# Supplementary material for: Long-term dietary patterns are associated with pro-inflammatory and anti-inflammatory features of the gut microbiome
Source: Gut. 2021 Apr 2;70(7):1287–98. doi: 10.1136/gutjnl-2020-322670 (PMC8223641; doi:10.1136/gutjnl-2020-322670)
Supplement: Supplementary data [file gutjnl-2020-322670supp003.xlsx]

## Sheet: S2_food_clusters
Table S2. Composition of clusters
Dietary patterns identified through unsupervised clustering
Methods
Unsupervised hierarchical clustering based on squared Euclidean distances was used to cluster the dietary intake data.
1. Meat_Potatoes_Gravy	2. Sugar_Sweets	3. Fastfood	4. Meat	5. Spreads_sweet	6. Sweetened_tea_yoghurtdrink	7. Eggs_Alcoholic_drinks	8. Wine_Alcohol	9. Cheese_Butter	10. Fish_Nuts	11. Ready_meals	12. Dairy_lf	13. Bread_Legumes	14. Dairy_Lean_beef	15. Vegetables_Fruit_Tea	16. Pasta_Pizza	17. Icecream_Beer_non-alcoholic	18. Savoury_snacks	19. Rolls_Spreads	20. Pastry_Cream	21. Pastry_Sweets	22. Dairy_Cereals	23. Fruit_Juice_Milk	24. Coffee_milk_Soup	25. Porridge_ready_Fish_fried_Chocolatemilk
beef_high_fat	coffeemilk_lf	crisps	chicken	carb_en%	crackers	beer	alcohol_en%	butter	fat_en%	group_prepared_meal	4.cheese_20-30%	bread	12.beef_lean	fruit	cheese_topping	16.beer_non_alcoholic	23.mayonaise	2.butter_bread	applesauce	biscuits	11.group_cereals	10.fruitjuice	15coffeemilk_ff	13.chocolatemilk
coffeecreamer	group_sugar_sweets	group_meat	minced_meat	chocolatespreads	sugar_tea	breakfast_drink	alcohol_g/day	cheese_48%	fish_fatty	ready_meals_chinese	4.milk_skimmed	group_breads	12.buttermilk	group_tea	group_pasta	16.icecream_dairy	23.white_sauces	2.cheese_40%	custard_ff	cake	11.group_dairy	10.group_fruits	15.group_soup	13.fish_white_fried
gravy	sugar_coffee	group_nonalc_drinks	other_meat_poultry	margarine_lf_bread	yoghurtdrink_flavour_sugar	egg_baked	wine_fort	creamcheese	fish_lean	ready_meals_other	4.saladdressing_no_fat	group_legumes	12.curd_cheese_fruit	group_vegetables	group_sauces		23.white_sauces_snack	2.group_cheese	pastry	candybars	11.milk_semiskimmed	10.milk_whole	15.milk_coffee	13.porridge_ready_made
group_coffee	sugar_yoghurt	group_savoury_snacks	pork_lean	other_custard_curds	yoghurtdrink_other	egg_cooked	wine_red		fish_other	softdrink_no_sugar		plant_protein_en%	12.animal_protein_en%	vegetables_cooked_nobutter	pizza		23.salad_toast	2.group_rice	whipped_cream	chocolate	11.yoghurt_lf_fruits		15.soup
group_potatoes		mayonaise_snack	pork_processed	spiced_cake		group_alcohol	wine_white		fish_prepared_fat			peanutbutter	12.protein_en%	vegetables_stirfried	sandwichspread		23.saladdressing_fat	2.group_spreads		group_pastry			15.yoghurt_ff
pork_high_fat		meals_fast_food	sausage_smoked	spreads_sweet		group_eggs			group_fish			soup_legumes	12.yoghurt_lf		sauce_hot		23.snack_cheese	2.rolls		sweets
potato_cooked_mashed		bacon_belly_pork	sausage_smoked			other_alcohol			group_nuts								23.snack_meats	2.plant_protein_g/d
vegetables_cooked_butter		meat_cold_cuts				spirits			herring_salted									2.energy_kcal/day
		potato_baked_fries							nuts_topping									2.carb_g/d
		snack_savoury_hot							snack_nut									2.fat_g/d
		softdrink_sugar
		animal_protein_g/d
		protein_g/d

## Sheet: S2_pw_clusters
Table S2. Composition of clusters
Pathway clusters identified through unsupervised clustering
Methods
Unsupervised hierarchical clustering based on squared Euclidean distances was used to cluster pathway abundance
P1_AA-synthesis and starch degradation	P2_Aerobic respiration, ECA-, LPS-, heme-synthesis	P3_AA-synthesis	P4_Ferment. acetylene and pyruvate to acetate, urea cycle	P5_Biotin and FA-synthesis (E. coli)	P6_Ferment. glutamate and pyruvate	P7_Colanic acid building blocks synthesis	P8_Creatinine degradation I	P9_Enterobactin-, LPS-, quinone-synthesis (E.coli)	P10_FA and beta-oxidation	P11_Mixed acid fermentation	P12_Ferment. pyruvate and glycerol	P13_Ferment. to butanoate	P14_Sucrose degradation, heme synthesis (aerobic)	P15_Methanogenesis	P16_Bifidobacterium shunt	P17_Polyamine synthesis	P18_Formaldehyde assimilation	P19_Biotin biosynthesis II (Bacillus subtilis)	P20_Terpenoid synthesis via mevalonate	P21_Glycogen degradation	P22_Peptidoglycan synthesis IV (Enterococcus faecium)	P23_L-glutamine synthesis	P24_L-phenylalanine synthesis	P25_L-tyrosine synthesis	P26_Thiamin synthesis	P27_dTTP synthesis	P28_UTP and CTP degradation	P29_DMK synthesis	P30_Mannan degradation	P31_Anhydromuropeptides recycling
1. peptidoglycan biosynthesis I (meso-diaminopimelate containing)	2. 3-phenylpropanoate and 3-(3-hydroxyphenyl)propanoate degradation	3. 4-deoxy-L-threo-hex-4-enopyranuronate degradation	4. acetylene degradation	5. (5Z)-dodec-5-enoate biosynthesis	6. acetyl-CoA fermentation to butanoate II	7. colanic acid building blocks biosynthesis	8. creatinine degradation I	9. &gamma;-glutamyl cycle	10. C4 photosynthetic carbon assimilation cycle, NAD-ME type	11. C4 photosynthetic carbon assimilation cycle, PEPCK type	12. 4-amino-2-methyl-5-phosphomethylpyrimidine biosynthesis (yeast)	13. 4-aminobutanoate degradation V	14. heme biosynthesis I (aerobic)	15. 7-(3-amino-3-carboxypropyl)-wyosine biosynthesis	16. Bifidobacterium shunt	17. superpathway of polyamine biosynthesis II	18. formaldehyde assimilation II (RuMP Cycle)	19. biotin biosynthesis II (Bacillus subtilis)	20. mevalonate pathway I	21. glycogen degradation II (eukaryotic)	22. peptidoglycan biosynthesis IV (Enterococcus faecium)	23. L-glutamine biosynthesis III	24. superpathway of L-phenylalanine biosynthesis	25. superpathway of L-tyrosine biosynthesis	26. superpathway of thiamin diphosphate biosynthesis I	27. pyrimidine deoxyribonucleotides biosynthesis from CTP	28. superpathway of pyrimidine ribonucleosides degradation	29. 1,4-dihydroxy-6-naphthoate biosynthesis II	30. mannan degradation	31. anhydromuropeptides recycling
1. peptidoglycan biosynthesis III (mycobacteria)	2. 4-hydroxyphenylacetate degradation	3. adenosine nucleotides degradation II	4. CMP-3-deoxy-D-manno-octulosonate biosynthesis I	5. 1,4-dihydroxy-2-naphthoate biosynthesis I	6. L-glutamate degradation V (via hydroxyglutarate)	7. glycogen degradation I (bacterial)		9. ADP-L-glycero-&beta;-D-manno-heptose biosynthesis	10. C4 photosynthetic carbon assimilation cycle, NADP-ME type	11. mixed acid fermentation	12. 6-hydroxymethyl-dihydropterin diphosphate biosynthesis I	13. GABA shunt	14. sucrose degradation IV (sucrose phosphorylase)	15. all-trans-farnesol biosynthesis			18. formaldehyde oxidation I		20. superpathway of geranylgeranyldiphosphate biosynthesis I (via mevalonate)						26. thiazole biosynthesis I (E. coli)	27. pyrimidine deoxyribonucleotides de novo biosynthesis IV		29. TCA cycle III (animals)
1. phosphopantothenate biosynthesis I	2. aerobactin biosynthesis	3. adenosylcobalamin salvage from cobinamide I	4. heme biosynthesis II (anaerobic)	5. 8-amino-7-oxononanoate biosynthesis I	6. pyruvate fermentation to butanoate	7. mannitol cycle		9. dTDP-N-acetylthomosamine biosynthesis	10. fatty acid &beta;-oxidation I	11. TCA cycle VI (obligate autotrophs)	12. 6-hydroxymethyl-dihydropterin diphosphate biosynthesis III (Chlamydia)	13. phytate degradation I	14. superpathay of heme biosynthesis from glutamate	15. factor 420 biosynthesis
1. preQ0 biosynthesis	2. aerobic respiration I (cytochrome c)	3. anaerobic energy metabolism (invertebrates, cytosol)	4. L-citrulline biosynthesis	5. biotin biosynthesis I	6. superpathway of Clostridium acetobutylicum acidogenic fermentation	7. superpathway of GDP-mannose-derived O-antigen building blocks biosynthesis		9. enterobactin biosynthesis	10. fatty acid &beta;-oxidation II (peroxisome)		12. flavin biosynthesis I (bacteria and plants)	13. pyruvate fermentation to propanoate I		15. flavin biosynthesis II (archaea)
1. purine ribonucleosides degradation	2. aerobic respiration II (cytochrome c) (yeast)	3. aspartate superpathway	4. L-histidine degradation I	5. fatty acid elongation -- saturated				9. glucose and glucose-1-phosphate degradation	10. fucose degradation		12. formaldehyde assimilation III (dihydroxyacetone cycle)	13. superpathway of sulfur amino acid biosynthesis (Saccharomyces cerevisiae)		15. methanogenesis from H2 and CO2
1. pyruvate fermentation to acetate and lactate II	2. allantoin degradation IV (anaerobic)	3. cis-vaccenate biosynthesis	4. L-histidine degradation III	5. mycolate biosynthesis				9. glyoxylate cycle	10. NAD salvage pathway II		12. gluconeogenesis I			15. taxadiene biosynthesis (engineered)
1. pyruvate fermentation to isobutanol (engineered)	2. allantoin degradation to glyoxylate III	3. coenzyme A biosynthesis I	4. L-ornithine de novo biosynthesis	5. octanoyl-[acyl-carrier protein] biosynthesis (mitochondria, yeast)				9. ketogluconate metabolism	10. sulfate reduction I (assimilatory)		12. gluconeogenesis III
1. queuosine biosynthesis	2. arginine, ornithine and proline interconversion	3. D-fructuronate degradation	4. phosphatidylglycerol biosynthesis I (plastidic)	5. oleate biosynthesis IV (anaerobic)				9. L-glutamate and L-glutamine biosynthesis	10. superpathway of glycolysis and Entner-Doudoroff		12. glycerol degradation to butanol
1. S-adenosyl-L-methionine cycle I	2. cholate degradation (bacteria, anaerobic)	3. D-galacturonate degradation I	4. phosphatidylglycerol biosynthesis II (non-plastidic)	5. palmitate biosynthesis II (bacteria and plants)				9. lipid IVA biosynthesis	10. superpathway of L-methionine biosynthesis (by sulfhydrylation)		12. guanosine nucleotides degradation II
1. stachyose degradation	2. chorismate biosynthesis II (archaea)	3. flavin biosynthesis III (fungi)	4. superpathway of fermentation (Chlamydomonas reinhardtii)	5. palmitoleate biosynthesis I (from (5Z)-dodec-5-enoate)				9. NAD/NADH phosphorylation and dephosphorylation	10. superpathway of sulfate assimilation and cysteine biosynthesis		12. incomplete reductive TCA cycle
1. starch degradation V	2. cinnamate and 3-hydroxycinnamate degradation to 2-oxopent-4-enoate	3. GDP-mannose biosynthesis	4. superpathway of L-alanine biosynthesis	5. superpathway of fatty acid biosynthesis initiation (E. coli)				9. NAD/NADP-NADH/NADPH mitochondrial interconversion (yeast)			12. ppGpp biosynthesis
1. sucrose degradation III (sucrose invertase)	2. D-glucarate degradation I	3. glutaryl-CoA degradation	4. superpathway of phospholipid biosynthesis I (bacteria)	5. superpathway of menaquinol-13 biosynthesis				9. nitrate reduction VI (assimilatory)			12. purine nucleobases degradation I (anaerobic)
1. superpathway of 5-aminoimidazole ribonucleotide biosynthesis	2. enterobacterial common antigen biosynthesis	3. glycolysis I (from glucose 6-phosphate)	4. urea cycle	5. superpathway of menaquinol-7 biosynthesis				9. phosphatidylcholine acyl editing			12. pyridoxal 5'-phosphate biosynthesis I
1. superpathway of adenosine nucleotides de novo biosynthesis I	2. heterolactic fermentation	3. glycolysis II (from fructose 6-phosphate)		5. superpathway of mycolate biosynthesis				9. polyisoprenoid biosynthesis (E. coli)			12. pyruvate fermentation to acetone
1. superpathway of adenosine nucleotides de novo biosynthesis II	2. isoprene biosynthesis II (engineered)	3. glycolysis VI (metazoan)		5. superpathway of phylloquinol biosynthesis				9. pyridoxal 5'-phosphate salvage II (plants)			12. superpathway of glycerol degradation to 1,3-propanediol
1. superpathway of aromatic amino acid biosynthesis	2. L-1,2-propanediol degradation	3. gondoate biosynthesis (anaerobic)		5. superpathway of unsaturated fatty acids biosynthesis (E. coli)				9. reductive TCA cycle I			12. superpathway of guanosine nucleotides degradation (plants)
1. superpathway of branched amino acid biosynthesis	2. L-arginine degradation II (AST pathway)	3. guanosine deoxyribonucleotides de novo biosynthesis II						9. Rubisco shunt			12. superpathway of pyridoxal 5'-phosphate biosynthesis and salvage
1. superpathway of L-isoleucine biosynthesis I	2. L-glutamate degradation VIII (to propanoate)	3. guanosine nucleotides degradation III						9. starch degradation III			12. superpathway of tetrahydrofolate biosynthesis
1. superpathway of L-lysine, L-threonine and L-methionine biosynthesis II	2. leucopelargonidin and leucocyanidin biosynthesis	3. hexitol fermentation to lactate, formate, ethanol and acetate						9. superpathway of acetyl-CoA biosynthesis			12. superpathway of tetrahydrofolate biosynthesis and salvage
1. superpathway of L-methionine biosynthesis (transsulfuration)	2. mannosylglycerate biosynthesis I	3. homolactic fermentation						9. superpathway of cytosolic glycolysis (plants), pyruvate dehydrogenase and TCA cycle			12. TCA cycle I (prokaryotic)
1. superpathway of L-serine and glycine biosynthesis I	2. methylphosphonate degradation I	3. inosine-5'-phosphate biosynthesis I						9. superpathway of demethylmenaquinol-6 biosynthesis I			12. TCA cycle II (plants and fungi)
1. superpathway of L-threonine biosynthesis	2. methylphosphonate degradation II	3. inosine-5'-phosphate biosynthesis II						9. superpathway of demethylmenaquinol-8 biosynthesis			12. TCA cycle V (2-oxoglutarate:ferredoxin oxidoreductase)
1. superpathway of pyrimidine ribonucleotides de novo biosynthesis	2. mevalonate pathway II (archaea)	3. inosine-5'-phosphate biosynthesis III						9. superpathway of demethylmenaquinol-9 biosynthesis			12. tetrapyrrole biosynthesis II (from glycine)
1. superpathway of S-adenosyl-L-methionine biosynthesis	2. molybdenum cofactor biosynthesis	3. isoprene biosynthesis I						9. superpathway of fatty acids biosynthesis (E. coli)
1. tetrapyrrole biosynthesis I (from glutamate)	2. myo-inositol degradation I	3. L-arginine biosynthesis II (acetyl cycle)						9. superpathway of fucose and rhamnose degradation
1. thiamin formation from pyrithiamine and oxythiamine (yeast)	2. phenylacetate degradation I (aerobic)	3. L-arginine biosynthesis III (via N-acetyl-L-citrulline)						9. superpathway of glycolysis, pyruvate dehydrogenase, TCA, and glyoxylate bypass
1. tRNA charging	2. phospholipid remodeling (phosphatidylethanolamine, yeast)	3. L-isoleucine biosynthesis II						9. superpathway of glyoxylate bypass and TCA
1. UDP-N-acetylmuramoyl-pentapeptide biosynthesis I (meso-diaminopimelate containing)	2. phytol degradation	3. L-isoleucine biosynthesis IV						9. superpathway of glyoxylate cycle and fatty acid degradation
1. UDP-N-acetylmuramoyl-pentapeptide biosynthesis II (lysine-containing)	2. polymyxin resistance	3. L-lysine biosynthesis I						9. superpathway of L-tryptophan biosynthesis
1. UMP biosynthesis	2. sulfoglycolysis	3. L-lysine biosynthesis II						9. superpathway of menaquinol-10 biosynthesis
1. urate biosynthesis/inosine 5'-phosphate degradation	2. superpathway of (Kdo)2-lipid A biosynthesis	3. L-methionine biosynthesis I						9. superpathway of menaquinol-6 biosynthesis I
	2. superpathway of (R,R)-butanediol biosynthesis	3. L-methionine biosynthesis III						9. superpathway of menaquinol-8 biosynthesis I
	2. superpathway of allantoin degradation in plants	3. L-ornithine biosynthesis						9. superpathway of thiamin diphosphate biosynthesis II
	2. superpathway of D-glucarate and D-galactarate degradation	3. L-proline biosynthesis II (from arginine)						9. superpathway of UDP-glucose-derived O-antigen building blocks biosynthesis
	2. superpathway of glycol metabolism and degradation	3. L-rhamnose degradation I						9. TCA cycle IV (2-oxoglutarate decarboxylase)
	2. superpathway of heme biosynthesis from glycine	3. lactose and galactose degradation I						9. TCA cycle VII (acetate-producers)
	2. superpathway of heme biosynthesis from uroporphyrinogen-III	3. methylerythritol phosphate pathway II						9. TCA cycle VIII (helicobacter)
	2. superpathway of L-arginine and L-ornithine degradation	3. myo-, chiro- and scillo-inositol degradation						9. thiazole biosynthesis II (Bacillus)
	2. superpathway of lipopolysaccharide biosynthesis	3. NAD salvage pathway I						9. trehalose degradation V
	2. superpathway of menaquinol-8 biosynthesis II	3. O-antigen building blocks biosynthesis (E. coli)
	2. superpathway of methylglyoxal degradation	3. pantothenate and coenzyme A biosynthesis III
	2. superpathway of ornithine degradation	3. pentose phosphate pathway
	2. superpathway of ubiquinol-6 biosynthesis (eukaryotic)	3. peptidoglycan maturation (meso-diaminopimelate containing)
	2. superpathway of ubiquinol-8 biosynthesis (prokaryotic)	3. petroselinate biosynthesis
	2. teichoic acid (poly-glycerol) biosynthesis	3. purine nucleotides degradation II (aerobic)
	2. tRNA processing	3. putrescine biosynthesis IV
	2. ubiquinol-8 biosynthesis (prokaryotic)	3. pyrimidine deoxyribonucleosides salvage
	2. unsaturated, even numbered fatty acid &beta;-oxidation	3. pyrimidine deoxyribonucleotide phosphorylation
		3. pyrimidine deoxyribonucleotides de novo biosynthesis I
		3. pyrimidine deoxyribonucleotides de novo biosynthesis II
		3. pyrimidine deoxyribonucleotides de novo biosynthesis III
		3. seleno-amino acid biosynthesis
		3. stearate biosynthesis II (bacteria and plants)
		3. superpathway of &beta;-D-glucuronide and D-glucuronate degradation
		3. superpathway of arginine and polyamine biosynthesis
		3. superpathway of geranylgeranyl diphosphate biosynthesis II (via MEP)
		3. superpathway of glucose and xylose degradation
		3. superpathway of guanosine nucleotides de novo biosynthesis I
		3. superpathway of guanosine nucleotides de novo biosynthesis II
		3. superpathway of hexitol degradation (bacteria)
		3. superpathway of hexuronide and hexuronate degradation
		3. superpathway of histidine, purine, and pyrimidine biosynthesis
		3. superpathway of L-aspartate and L-asparagine biosynthesis
		3. superpathway of L-lysine, L-threonine and L-methionine biosynthesis I
		3. superpathway of N-acetylglucosamine, N-acetylmannosamine and N-acetylneuraminate degradation
		3. superpathway of N-acetylneuraminate degradation
		3. superpathway of polyamine biosynthesis I
		3. superpathway of purine deoxyribonucleosides degradation
		3. superpathway of purine nucleotide salvage
		3. superpathway of purine nucleotides de novo biosynthesis I
		3. superpathway of purine nucleotides de novo biosynthesis II
		3. superpathway of pyrimidine deoxyribonucleosides degradation
		3. superpathway of pyrimidine deoxyribonucleotides de novo biosynthesis
		3. superpathway of pyrimidine deoxyribonucleotides de novo biosynthesis (E. coli)
		3. superpathway of pyrimidine nucleobases salvage
		3. superpathway of pyrimidine ribonucleosides salvage
		3. superpathway of thiamin diphosphate biosynthesis III (eukaryotes)
		3. thiamin salvage II
		3. UDP-N-acetyl-D-glucosamine biosynthesis I

## Sheet: S2_bacterial_clusters
Table S2. Composition of clusters
Bacterial clusters identified through unsupervised clustering
Methods
Unsupervised hierarchical clustering based on Bray-curtis dissimilarity was used to cluster bacteria at the species and strain level
S1_Acetate/butyrate producers	S2_Bifidobacterium animalis	S3_Faecalibacterium prausnitzii, Bifidobacterium bifidum	S4_Bifidobacterium catenulatum	S5_Streptococcus, Bifidobacterium dentium	S6_Bifidobcterium pseudocatenulatum	S7_Alistipes, Bacteroides	S8_Eggerthella lenta, Gordonibacter pamelaeae	S9_Bacteroides, Roseburia	S10_Bacteroides eggerthii	S11_Bacteroides faecis	S12_Bacteroides finegoldii	S13_Escherichia coli, Bacteroides fragilis	S14_Odoribacter	S15_Parabacteroides johnsonii	S16_Propionate/succinate producers	S17_Alistipes	S18_Lactobacillus delbrueckii	S19_Streptococci, L. sakei	S20_Lactococcus lactis	S21_Clostridium bolteae, Coprobacillus	S22_Mucin degraders	S23_B. hydrogenotrophica	S24_Ruminococcus gnavus, Lachnospiraceae bacterium 1 1 57FAA	S25_Lachnospiraceae bacterium 3 1 57FAA	S26_Roseburia	S27_Turicibacter_sanguinis	S28_Haemophilus, Veillonella	S29_Sutterella wadsworthensis
1.Bifidobacterium_adolescentis	2.Bifidobacterium_animalis.t__unclassified	3.Bifidobacterium_bifidum.t__unclassified	4.Bifidobacterium_catenulatum.t__GCF_000173455	5.Bifidobacterium_dentium.t__unclassified	6.Bifidobacterium_pseudocatenulatum.t__GCF_000173435	7.Adlercreutzia_equolifaciens.t__GCF_000478885	8.Eggerthella_lenta.t__GCF_000024265	9.Alistipes_putredinis.t__GCF_000154465	10.Bacteroides_eggerthii.t__unclassified	11.Bacteroides_faecis.t__GCF_000226135	12.Bacteroides_finegoldii.t__unclassified	13.Bacteroides_fragilis	14.Odoribacter_unclassified	15.Parabacteroides_johnsonii.t__unclassified	16.Eubacterium_biforme.t__GCF_000156655	17.Alistipes_unclassified	18.Lactobacillus_delbrueckii.t__unclassified	19.Lactobacillus_sakei	20.Lactococcus_lactis.t__unclassified	21.Clostridium_bolteae	22.Akkermansia_muciniphila.t__GCF_000020225	23.Blautia_hydrogenotrophica.t__GCF_000157975	24.Lachnospiraceae_bacterium_1_1_57FAA.t__GCF_000218445	25.Lachnospiraceae_bacterium_3_1_57FAA_CT1.t__GCF_000218405	26.Roseburia_unclassified	27.Turicibacter_sanguinis.t__GCF_000178255	28.Haemophilus_parainfluenzae.t__unclassified	29.Sutterella_wadsworthensis
1.Bifidobacterium_adolescentis.t__unclassified		3.Faecalibacterium_prausnitzii.t__GCF_000166035		5.Streptococcus_anginosus.t__unclassified		7.Alistipes_finegoldii.t__GCF_000265365	8.Eggerthella_unclassified	9.Bacteroides_caccae.t__unclassified				13.Bacteroides_fragilis.t__unclassified			16.Phascolarctobacterium_succinatutens.t__GCF_000188175			19.Lactobacillus_sakei.t__unclassified		21.Coprobacillus_unclassified	22.Eubacterium_siraeum		24.Ruminococcus_gnavus.t__unclassified			27.Turicibacter_unclassified	28.Veillonella_parvula.t__unclassified	29.Sutterella_wadsworthensis.t__unclassified
1.Bifidobacterium_longum				5.Streptococcus_mutans.t__unclassified		7.Alistipes_indistinctus.t__GCF_000231275	8.Gordonibacter_pamelaeae.t__GCF_000210055	9.Bacteroides_dorei.t__unclassified				13.Escherichia_coli.t__unclassified			16.Prevotella_copri.t__GCF_000157935			19.Streptococcus_australis.t__unclassified		21.Lachnospiraceae_bacterium_1_4_56FAA.t__GCF_000218385	22.Eubacterium_siraeum.t__unclassified						28.Veillonella_unclassified
1.Bifidobacterium_longum.t__unclassified				5.Streptococcus_vestibularis.t__unclassified		7.Alistipes_onderdonkii.t__GCF_000374505		9.Bacteroides_massiliensis.t__unclassified				13.Escherichia_unclassified						19.Streptococcus_sanguinis.t__unclassified		21.Lachnospiraceae_bacterium_2_1_58FAA.t__GCF_000218465	22.Ruminococcus_lactaris.t__unclassified
1.Collinsella_aerofaciens.t__GCF_000169035						7.Alistipes_shahii.t__GCF_000210575		9.Bacteroides_ovatus				13.Parabacteroides_unclassified									22.Ruminococcus_obeum.t__GCF_000153905
1.Coprococcus_catus.t__GCF_000210555						7.Anaerostipes_hadrus.t__GCF_000332875		9.Bacteroides_ovatus.t__unclassified
1.Coprococcus_comes.t__GCF_000155875						7.Bacteroidales_bacterium_ph8.t__GCF_000311925		9.Bacteroides_stercoris
1.Dialister_invisus.t__GCF_000160055						7.Bacteroides_cellulosilyticus.t__unclassified		9.Bacteroides_stercoris.t__unclassified
1.Dorea_formicigenerans						7.Bacteroides_thetaiotaomicron.t__unclassified		9.Bacteroides_uniformis
1.Dorea_formicigenerans.t__unclassified						7.Bacteroides_xylanisolvens.t__unclassified		9.Bacteroides_uniformis.t__unclassified
1.Dorea_longicatena.t__GCF_000154065						7.Bilophila_unclassified		9.Bacteroides_vulgatus.t__unclassified
1.Eubacterium_hallii.t__GCF_000173975						7.Clostridium_leptum.t__GCF_000154345		9.Barnesiella_intestinihominis.t__GCF_000296465
1.Eubacterium_rectale.t__unclassified						7.Lachnospiraceae_bacterium_3_1_46FAA.t__GCF_000209405		9.Clostridium_bartlettii.t__GCF_000154445
1.Faecalibacterium_prausnitzii						7.Lachnospiraceae_bacterium_5_1_63FAA.t__GCF_000185525		9.Eubacterium_eligens.t__GCF_000146185
1.Faecalibacterium_prausnitzii.t__GCF_000162015						7.Lachnospiraceae_bacterium_7_1_58FAA.t__GCF_000242155		9.Eubacterium_ramulus.t__GCF_000469345
1.Faecalibacterium_prausnitzii.t__unclassified						7.Oscillibacter_unclassified		9.Eubacterium_ventriosum.t__GCF_000153885
1.Ruminococcus_bromii.t__GCF_000209875						7.Parabacteroides_distasonis.t__unclassified		9.Lachnospiraceae_bacterium_8_1_57FAA.t__GCF_000185545
1.Ruminococcus_obeum						7.Paraprevotella_clara.t__GCF_000233955		9.Parabacteroides_merdae
1.Ruminococcus_obeum.t__unclassified						7.Paraprevotella_unclassified		9.Parabacteroides_merdae.t__unclassified
1.Ruminococcus_sp_5_1_39BFAA.t__GCF_000159975								9.Peptostreptococcaceae_noname_unclassified
1.Ruminococcus_torques								9.Roseburia_hominis.t__GCF_000225345
1.Ruminococcus_torques.t__unclassified								9.Roseburia_intestinalis.t__unclassified
1.Streptococcus_thermophilus.t__unclassified								9.Roseburia_inulinivorans.t__GCF_000174195
1.Subdoligranulum_unclassified								9.Ruminococcus_callidus.t__GCF_000468015
								9.Streptococcus_parasanguinis.t__unclassified
								9.Streptococcus_salivarius.t__unclassified
