# Supplementary material for: Long-term dietary patterns are associated with pro-inflammatory and anti-inflammatory features of the gut microbiome
Source: Gut. 2021 Apr 2;70(7):1287–98. doi: 10.1136/gutjnl-2020-322670 (PMC8223641; doi:10.1136/gutjnl-2020-322670)
Supplement: Supplementary data [file gutjnl-2020-322670supp004.xlsx]

## Sheet: S3_Pw_clusters
Table S3. Associations of pathway clusters with food clusters
Shown are all associations per cohort and pooled results of the meta-analysis. Statistically significant results of the meta-analysis are coloured:
Red = positive association (FDR < 0.05, het-p > 0.05); blue = negative association (FDR < 0.05, het-p > 0.05); Light red and light blue inidicate heterogeneous results (FDR < 0.05 but het-p < 0.05)
Methods
Unsupervised hierarchical clustering ased on squared Euclidean distances was used to identify clusters of foods and pathways.
In each cohort, a multivariate linear model of food clusters versus microbial clusters was constructed, adding age, sex, caloric intake and sequencing depth as covariates.
Next, an inverse-variance meta-analysis was performed, followed by multiple testing correction and a Cochran’s Q test
Pathway cluster	Food cluster	N.CD	non-zeros.CD	Mean.CD	SD.CD	Coef.CD	SE.CD	Pval.CD	Qval.CD	food.CD	N.UC	non-zeros.UC	Mean.UC	SD.UC	Coef.UC	SE.UC	Pval.UC	Qval.UC	food.UC	N.IBS	non-zeros.IBS	Mean.IBS	SD.IBS	Coef.IBS	SE.IBS	Pval.IBS	Qval.IBS	food.IBS	N.HC	non-zeros.HC	Mean.HC	SD.HC	Coef.HC	SE.HC	Pval.HC	Qval.HC	food.HC	inverse_var.cd	inverse_var.uc	inverse_var.ibs	inverse_var.hc	se	beta	Z	P	FDR	Het.Q	Het.I2	Het.Pval
P22_Peptidoglycan synthesis IV (Enterococcus faecium)	Dairy_Cereals	205	205	-0.161259	0.558239	0.395936	0.131458	0.00293321	0.0909296	Dairy_Cereals	126	126	-0.0521211	0.621192	0.547099	0.153022	0.000505149	0.0156596	Dairy_Cereals	223	223	-0.0111794	0.671357	0.00214943	0.102215	0.983242	0.983242	Dairy_Cereals	871	871	0.0462207	0.622802	0.156394	0.0561628	0.00547553	0.169742	Dairy_Cereals	57.8662	42.7062	95.7136	317.031	0.0441374	0.187142	4.23999	2.23533e-05	0.000692951	11.6313	0.742076	0.0029805
P25_L-tyrosine synthesis	Fish_Nuts	205	205	-0.135461	0.55016	-0.312434	0.125749	0.0137955	0.106915	Fish_Nuts	126	126	0.0141888	0.575752	-0.342767	0.171851	0.0483581	0.254269	Fish_Nuts	223	223	0.0520077	0.656703	-0.0672973	0.102605	0.512593	0.940283	Fish_Nuts	871	871	0.0168252	0.570004	-0.190473	0.0590339	0.00130021	0.0267834	Fish_Nuts	63.2399	33.8606	94.9859	286.944	0.0456897	-0.192915	-4.22228	2.41843e-05	0.000749715	3.16429	0.0519209	0.205533
P22_Peptidoglycan synthesis IV (Enterococcus faecium)	Sweetened_tea_yoghurtdrink	205	205	0.111425	1.12755	0.0351927	0.0665837	0.597708	0.772039	Sweetened_tea_yoghurtdrink	126	126	0.0674218	0.540567	0.198594	0.189391	0.296473	0.61271	Sweetened_tea_yoghurtdrink	223	223	0.00250442	0.480442	0.366668	0.133023	0.006341	0.196571	Sweetened_tea_yoghurtdrink	871	871	-0.0373747	0.434722	0.323433	0.0777383	3.49208e-05	0.00108255	Sweetened_tea_yoghurtdrink	225.561	27.8794	56.5129	165.474	0.0458625	0.184499	4.02288	5.7492e-05	0.00178225	10.1033	0.703067	0.00639877
P13_Ferment. to butanoate	Eggs_Alcoholic_drinks	205	205	-0.104303	0.43925	-0.102772	0.114009	0.368445	0.715499	Eggs_Alcoholic_drinks	126	126	-0.134042	0.302491	0.1146	0.241806	0.636409	0.896758	Eggs_Alcoholic_drinks	223	223	-0.0546888	0.448173	-0.152903	0.105183	0.147477	0.70834	Eggs_Alcoholic_drinks	871	871	0.0583724	0.606478	-0.141312	0.0416297	0.000718841	0.0222841	Eggs_Alcoholic_drinks	76.9345	17.1028	90.3879	577.024	0.0362393	-0.133046	-3.67131	0.00024131	0.0074806	1.19446	0	0.550334
P22_Peptidoglycan synthesis IV (Enterococcus faecium)	Bread_Legumes	205	205	-0.0736819	0.691941	-0.125356	0.117252	0.286314	0.465013	Bread_Legumes	126	126	0.0277121	0.583927	-0.416374	0.181389	0.0234423	0.363356	Bread_Legumes	223	223	-0.116311	0.444079	0.0268423	0.160393	0.867248	0.96661	Bread_Legumes	871	871	0.0435099	0.579569	-0.214001	0.0658144	0.00119204	0.0292085	Bread_Legumes	72.7376	30.3932	38.8715	230.865	0.0517872	-0.188096	-3.6321	0.000281126	0.00871491	3.82087	0.214839	0.148016
P4_Ferment. acetylene to acetate	Fish_Nuts	205	205	-0.135461	0.55016	0.0619112	0.0584705	0.290954	0.501858	Fish_Nuts	126	126	0.0141888	0.575752	0.0971413	0.0701949	0.168964	0.523788	Fish_Nuts	223	223	0.0520077	0.656703	0.126431	0.0420944	0.00298368	0.0924942	Fish_Nuts	871	871	0.0168252	0.570004	0.0407159	0.0241676	0.0924017	0.318336	Fish_Nuts	292.501	202.95	564.354	1712.12	0.0189937	0.064535	3.39771	0.000679525	0.0105326	3.35126	0.104813	0.187191
P19_Biotin biosynthesis II (Bacillus subtilis)	Bread_Legumes	205	205	-0.0736819	0.691941	0.174594	0.106755	0.103532	0.246884	Bread_Legumes	126	126	0.0277121	0.583927	0.104976	0.157008	0.505034	0.680698	Bread_Legumes	223	223	-0.116311	0.444079	0.0190851	0.166283	0.90873	0.96661	Bread_Legumes	871	871	0.0435099	0.579569	0.210733	0.0675976	0.00188442	0.0292085	Bread_Legumes	87.7456	40.5655	36.1662	218.846	0.0510761	0.173187	3.39076	0.000696979	0.0108032	1.35628	0	0.50756
P13_Ferment. to butanoate	Spreads_sweet	205	205	-0.0555374	0.536875	-0.0337887	0.0951092	0.72277	0.858992	Spreads_sweet	126	126	0.0129582	0.465282	0.0413531	0.153172	0.78764	0.94189	Spreads_sweet	223	223	-0.0241369	0.470388	0.0558154	0.107764	0.605027	0.965036	Spreads_sweet	871	871	0.0180257	0.519839	0.192828	0.045832	2.85439e-05	0.00088486	Spreads_sweet	110.549	42.6228	86.11	476.06	0.0373889	0.132288	3.53817	0.000402917	0.0124904	5.64995	0.469022	0.0593102
P24_L-phenylalanine synthesis	Fish_Nuts	205	205	-0.135461	0.55016	-0.0421972	0.117441	0.719747	0.796863	Fish_Nuts	126	126	0.0141888	0.575752	-0.381018	0.164478	0.0222254	0.25173	Fish_Nuts	223	223	0.0520077	0.656703	0.00418563	0.0962633	0.965358	0.991392	Fish_Nuts	871	871	0.0168252	0.570004	-0.192124	0.0611233	0.00172796	0.0267834	Fish_Nuts	72.5039	36.9646	107.914	267.662	0.0454056	-0.140433	-3.09286	0.0019824	0.0204848	5.8114	0.483773	0.0547106
P12_Ferment. pyruvate and glycerol	Fish_Nuts	205	205	-0.135461	0.55016	0.222001	0.0744783	0.00323589	0.0916253	Fish_Nuts	126	126	0.0141888	0.575752	0.0692858	0.0780294	0.376347	0.596453	Fish_Nuts	223	223	0.0520077	0.656703	0.0709504	0.0458074	0.122867	0.634812	Fish_Nuts	871	871	0.0168252	0.570004	0.0387526	0.024753	0.117815	0.365227	Fish_Nuts	180.277	164.242	476.572	1632.09	0.02019	0.0605182	2.99744	0.00272257	0.0210999	5.53871	0.458358	0.0627023
P13_Ferment. to butanoate	Savoury_snacks	205	205	-0.0114351	0.501597	-0.252277	0.097442	0.0103364	0.32043	Savoury_snacks	126	126	0.0331572	0.582506	0.0167397	0.122084	0.891169	0.960509	Savoury_snacks	223	223	-0.010086	0.411775	-0.220664	0.116705	0.0599869	0.206622	Savoury_snacks	871	871	0.000932337	0.495994	-0.107316	0.0502365	0.0329412	0.340392	Savoury_snacks	105.319	67.0937	73.4205	396.243	0.0394645	-0.131092	-3.32177	0.000894485	0.027729	3.82601	0.215894	0.147636
P1_AA-synthesis and starch degradation	Sweetened_tea_yoghurtdrink	205	205	0.111425	1.12755	-0.138884	0.0669309	0.0392753	0.270679	Sweetened_tea_yoghurtdrink	126	126	0.0674218	0.540567	-0.360347	0.167065	0.0330053	0.255791	Sweetened_tea_yoghurtdrink	223	223	0.00250442	0.480442	0.00899628	0.1399	0.948787	0.99476	Sweetened_tea_yoghurtdrink	871	871	-0.0373747	0.434722	-0.131746	0.0721808	0.0683118	0.577794	Sweetened_tea_yoghurtdrink	223.227	35.8286	51.0931	191.936	0.0446284	-0.136911	-3.06779	0.00215649	0.0334256	2.8824	0	0.236644
P22_Peptidoglycan synthesis IV (Enterococcus faecium)	Dairy_Lean_beef	205	205	-0.201195	0.55624	0.226333	0.130486	0.0843706	0.796221	Dairy_Lean_beef	126	126	-0.146976	0.56817	0.332859	0.175726	0.0606065	0.942544	Dairy_Lean_beef	223	223	0.0254258	0.537627	0.152883	0.127877	0.233178	0.80317	Dairy_Lean_beef	871	871	0.0612162	0.608226	0.0972407	0.0577498	0.0925759	0.478309	Dairy_Lean_beef	58.7317	32.3838	61.1522	299.846	0.0470301	0.138413	2.94308	0.00324966	0.0335798	2.19949	0	0.332955
P28_UTP and CTP degradation	Dairy_Lean_beef	205	205	-0.201195	0.55624	-0.0882016	0.150601	0.558765	0.936721	Dairy_Lean_beef	126	126	-0.146976	0.56817	-0.0754229	0.157035	0.631893	0.942544	Dairy_Lean_beef	223	223	0.0254258	0.537627	-0.264387	0.12235	0.0317974	0.531381	Dairy_Lean_beef	871	871	0.0612162	0.608226	-0.1216	0.0522081	0.0200807	0.207501	Dairy_Lean_beef	44.0904	40.5515	66.8025	366.881	0.0439237	-0.133549	-3.04048	0.00236201	0.0335798	1.42362	0	0.490754
P23_L-glutamine synthesis	Dairy_Lean_beef	205	205	-0.201195	0.55624	0.165645	0.138043	0.231584	0.936721	Dairy_Lean_beef	126	126	-0.146976	0.56817	0.177796	0.167313	0.290072	0.942544	Dairy_Lean_beef	223	223	0.0254258	0.537627	0.132545	0.131406	0.314259	0.86715	Dairy_Lean_beef	871	871	0.0612162	0.608226	0.135504	0.0557848	0.0153414	0.207501	Dairy_Lean_beef	52.4774	35.7226	57.9118	321.342	0.046252	0.141753	3.0648	0.00217819	0.0335798	0.0938216	0	0.954172
P20_Terpenoid synthesis via mevalonate	Fish_Nuts	205	205	-0.135461	0.55016	-0.153531	0.113473	0.177585	0.476394	Fish_Nuts	126	126	0.0141888	0.575752	-0.416573	0.139181	0.00335451	0.10399	Fish_Nuts	223	223	0.0520077	0.656703	-0.0458303	0.0959697	0.633451	0.940283	Fish_Nuts	871	871	0.0168252	0.570004	-0.0756991	0.0558552	0.175684	0.398971	Fish_Nuts	77.6635	51.6224	108.575	320.533	0.0423184	-0.112229	-2.65202	0.00800108	0.0346173	5.82043	0.484574	0.0544641
P5_Biotin and FA-synthesis (E. coli)	Fish_Nuts	205	205	-0.135461	0.55016	-0.270997	0.102527	0.00886696	0.0916253	Fish_Nuts	126	126	0.0141888	0.575752	-0.11189	0.142973	0.435407	0.596453	Fish_Nuts	223	223	0.0520077	0.656703	-0.1245	0.0880626	0.158862	0.70353	Fish_Nuts	871	871	0.0168252	0.570004	-0.0486199	0.0510693	0.341344	0.622451	Fish_Nuts	95.1319	48.9207	128.949	383.425	0.0390308	-0.100469	-2.5741	0.0100502	0.0346173	3.87805	0.226416	0.143844
P22_Peptidoglycan synthesis IV (Enterococcus faecium)	Fish_Nuts	205	205	-0.135461	0.55016	0.0341567	0.129715	0.792575	0.818994	Fish_Nuts	126	126	0.0141888	0.575752	-0.333311	0.172759	0.05605	0.254269	Fish_Nuts	223	223	0.0520077	0.656703	-0.155319	0.0982625	0.115414	0.634812	Fish_Nuts	871	871	0.0168252	0.570004	-0.111894	0.0603066	0.0638752	0.318336	Fish_Nuts	59.4323	33.5056	103.568	274.961	0.0460548	-0.118758	-2.57862	0.00991945	0.0346173	3.08345	0.0270636	0.214012
P9_Enterobactin-, LPS-, quinone-synthesis (E.coli)	Fish_Nuts	205	205	-0.135461	0.55016	-0.16772	0.114815	0.145652	0.476394	Fish_Nuts	126	126	0.0141888	0.575752	-0.137374	0.118259	0.247689	0.596453	Fish_Nuts	223	223	0.0520077	0.656703	-0.0919507	0.0814779	0.26034	0.884647	Fish_Nuts	871	871	0.0168252	0.570004	-0.074775	0.0443865	0.0924202	0.318336	Fish_Nuts	75.8583	71.504	150.633	507.571	0.035233	-0.0922955	-2.61958	0.00880384	0.0346173	0.732672	0	0.69327
P2_Aerobic respiration, ECA-, LPS-, heme-synthesis	Fish_Nuts	205	205	-0.135461	0.55016	-0.109601	0.0913285	0.231535	0.476394	Fish_Nuts	126	126	0.0141888	0.575752	-0.088225	0.0670444	0.190796	0.537697	Fish_Nuts	223	223	0.0520077	0.656703	-0.049056	0.0551426	0.374655	0.884647	Fish_Nuts	871	871	0.0168252	0.570004	-0.0515726	0.0285236	0.070943	0.318336	Fish_Nuts	119.891	222.472	328.871	1229.11	0.0229395	-0.0590889	-2.57586	0.00999903	0.0346173	0.597307	0	0.741816
P28_UTP and CTP degradation	Bread_Legumes	205	205	-0.0736819	0.691941	0.192875	0.134122	0.151988	0.336546	Bread_Legumes	126	126	0.0277121	0.583927	0.0540032	0.163277	0.741413	0.834951	Bread_Legumes	223	223	-0.116311	0.444079	0.128205	0.154359	0.407132	0.96661	Bread_Legumes	871	871	0.0435099	0.579569	0.147969	0.059739	0.0134421	0.138902	Bread_Legumes	55.5908	37.5102	41.97	280.21	0.0490715	0.143495	2.92421	0.00345328	0.0356839	0.451381	0	0.797965
P22_Peptidoglycan synthesis IV (Enterococcus faecium)	Spreads_sweet	205	205	-0.0555374	0.536875	0.123749	0.138976	0.374308	0.767382	Spreads_sweet	126	126	0.0129582	0.465282	0.31363	0.222711	0.161646	0.897772	Spreads_sweet	223	223	-0.0241369	0.470388	0.369915	0.14562	0.0117757	0.365046	Spreads_sweet	871	871	0.0180257	0.519839	0.104445	0.0672402	0.120713	0.287855	Spreads_sweet	51.7749	20.1612	47.1583	221.178	0.0542109	0.156568	2.88813	0.00387537	0.0400455	3.30052	0.0910513	0.192
P8_Creatinine degradation I	Spreads_sweet	205	205	-0.0555374	0.536875	-0.103834	0.119086	0.384302	0.767382	Spreads_sweet	126	126	0.0129582	0.465282	-0.250332	0.184022	0.176273	0.897772	Spreads_sweet	223	223	-0.0241369	0.470388	-0.0925028	0.153131	0.546423	0.965036	Spreads_sweet	871	871	0.0180257	0.519839	-0.172865	0.068695	0.0120358	0.0955773	Spreads_sweet	70.5146	29.5299	42.6457	211.909	0.0531045	-0.155924	-2.93617	0.00332291	0.0400455	0.686875	0	0.709328
P9_Enterobactin-, LPS-, quinone-synthesis (E.coli)	Sweetened_tea_yoghurtdrink	205	205	0.111425	1.12755	0.10183	0.0588409	0.0850719	0.344416	Sweetened_tea_yoghurtdrink	126	126	0.0674218	0.540567	0.384395	0.124117	0.00243402	0.0308831	Sweetened_tea_yoghurtdrink	223	223	0.00250442	0.480442	-0.021052	0.111892	0.850939	0.99476	Sweetened_tea_yoghurtdrink	871	871	-0.0373747	0.434722	0.0849755	0.0576938	0.141149	0.577794	Sweetened_tea_yoghurtdrink	288.83	64.9143	79.8727	300.429	0.0369095	0.106549	2.88677	0.00389219	0.0402193	6.45804	0.535463	0.0395963
P25_L-tyrosine synthesis	Cheese_Butter	205	205	-0.0931494	0.425837	-0.186222	0.162529	0.253265	0.55791	Cheese_Butter	126	126	-0.00880917	0.675371	-0.101401	0.148616	0.496363	0.88394	Cheese_Butter	223	223	-0.0538434	0.563146	-0.0154402	0.122186	0.899559	0.961096	Cheese_Butter	871	871	0.0356952	0.679706	-0.155131	0.050009	0.00198412	0.0615077	Cheese_Butter	37.8562	45.2759	66.9815	399.856	0.0426413	-0.135835	-3.18552	0.00144493	0.0447928	1.26957	0	0.53005
P15_Methanogenesis	Sweetened_tea_yoghurtdrink	205	205	0.111425	1.12755	0.152775	0.042671	0.000440153	0.0136448	Sweetened_tea_yoghurtdrink	126	126	0.0674218	0.540567	-0.013732	0.134871	0.919073	0.954156	Sweetened_tea_yoghurtdrink	223	223	0.00250442	0.480442	-0.0278496	0.129675	0.830152	0.99476	Sweetened_tea_yoghurtdrink	871	871	-0.0373747	0.434722	-0.0316924	0.0747276	0.671594	0.867476	Sweetened_tea_yoghurtdrink	549.204	54.9749	59.4687	179.076	0.0344475	0.0899683	2.61175	0.00900793	0.0470177	6.23371	0.518745	0.0442963
P25_L-tyrosine synthesis	Sweetened_tea_yoghurtdrink	205	205	0.111425	1.12755	0.0936373	0.0652394	0.152775	0.473603	Sweetened_tea_yoghurtdrink	126	126	0.0674218	0.540567	0.553395	0.182593	0.00298869	0.0308831	Sweetened_tea_yoghurtdrink	223	223	0.00250442	0.480442	0.0366882	0.140624	0.79442	0.99476	Sweetened_tea_yoghurtdrink	871	871	-0.0373747	0.434722	0.097504	0.0770919	0.206292	0.577794	Sweetened_tea_yoghurtdrink	234.952	29.9939	50.5689	168.261	0.0454651	0.117534	2.58515	0.0097336	0.0470177	6.23029	0.518481	0.0443721
P2_Aerobic respiration, ECA-, LPS-, heme-synthesis	Sweetened_tea_yoghurtdrink	205	205	0.111425	1.12755	0.0961113	0.0465782	0.040369	0.270679	Sweetened_tea_yoghurtdrink	126	126	0.0674218	0.540567	0.132239	0.0730784	0.072956	0.323091	Sweetened_tea_yoghurtdrink	223	223	0.00250442	0.480442	-0.0716198	0.0754926	0.343829	0.99476	Sweetened_tea_yoghurtdrink	871	871	-0.0373747	0.434722	0.0674986	0.0370597	0.0688995	0.577794	Sweetened_tea_yoghurtdrink	460.929	187.25	175.465	728.107	0.0253857	0.0680789	2.68178	0.00732306	0.0470177	4.55758	0.341757	0.102408
P3_AA-synthesis	Sweetened_tea_yoghurtdrink	205	205	0.111425	1.12755	-0.0973995	0.0499076	0.0523895	0.270679	Sweetened_tea_yoghurtdrink	126	126	0.0674218	0.540567	-0.224333	0.116075	0.0556355	0.323091	Sweetened_tea_yoghurtdrink	223	223	0.00250442	0.480442	0.0170769	0.103628	0.869262	0.99476	Sweetened_tea_yoghurtdrink	871	871	-0.0373747	0.434722	-0.0663528	0.0532584	0.213151	0.577794	Sweetened_tea_yoghurtdrink	401.482	74.22	93.1213	352.553	0.0329444	-0.0841749	-2.55506	0.0106169	0.0470177	2.59487	0	0.273232
P4_Ferment. acetylene to acetate	Bread_Legumes	205	205	-0.0736819	0.691941	0.0656203	0.0529402	0.216614	0.41969	Bread_Legumes	126	126	0.0277121	0.583927	0.14286	0.0736038	0.0546109	0.367008	Bread_Legumes	223	223	-0.116311	0.444079	0.130697	0.0695879	0.0617067	0.96661	Bread_Legumes	871	871	0.0435099	0.579569	0.0307637	0.0265194	0.246352	0.58479	Bread_Legumes	356.803	184.586	206.506	1421.91	0.0214679	0.0555425	2.58724	0.00967494	0.0499872	3.48303	0.138682	0.175255
P2_Aerobic respiration, ECA-, LPS-, heme-synthesis	Bread_Legumes	205	205	-0.0736819	0.691941	-0.174524	0.0821489	0.0348635	0.217326	Bread_Legumes	126	126	0.0277121	0.583927	-0.09161	0.0708943	0.198854	0.546841	Bread_Legumes	223	223	-0.116311	0.444079	-0.042597	0.089617	0.635035	0.96661	Bread_Legumes	871	871	0.0435099	0.579569	-0.0496172	0.0312697	0.112935	0.417355	Bread_Legumes	148.183	198.965	124.514	1022.71	0.0258685	-0.0670092	-2.59038	0.009587	0.0499872	2.21688	0	0.330073
P9_Enterobactin-, LPS-, quinone-synthesis (E.coli)	Bread_Legumes	205	205	-0.0736819	0.691941	-0.196376	0.10369	0.0596909	0.217326	Bread_Legumes	126	126	0.0277121	0.583927	-0.105962	0.125268	0.399304	0.589449	Bread_Legumes	223	223	-0.116311	0.444079	-0.0556539	0.132578	0.675061	0.96661	Bread_Legumes	871	871	0.0435099	0.579569	-0.087934	0.0486267	0.0708997	0.414293	Bread_Legumes	93.0101	63.7263	56.8924	422.912	0.0396357	-0.102699	-2.59107	0.00956777	0.0499872	1.03499	0	0.596011
P31_Anhydromuropeptides recycling	Spreads_sweet	205	205	-0.0555374	0.536875	0.0513571	0.107756	0.634167	0.858992	Spreads_sweet	126	126	0.0129582	0.465282	-0.075023	0.199025	0.706875	0.94189	Spreads_sweet	223	223	-0.0241369	0.470388	0.126803	0.152479	0.406542	0.965036	Spreads_sweet	871	871	0.0180257	0.519839	0.206976	0.0688233	0.00271166	0.0420307	Spreads_sweet	86.1221	25.2455	43.0112	211.12	0.0523067	0.141395	2.70319	0.00686779	0.0532254	2.79773	0	0.246876
P8_Creatinine degradation I	Bread_Legumes	205	205	-0.0736819	0.691941	0.335251	0.0979078	0.00074884	0.023214	Bread_Legumes	126	126	0.0277121	0.583927	-0.0386939	0.15301	0.80079	0.856017	Bread_Legumes	223	223	-0.116311	0.444079	0.157754	0.166017	0.343055	0.96661	Bread_Legumes	871	871	0.0435099	0.579569	0.0338745	0.0677909	0.61742	0.789433	Bread_Legumes	104.32	42.7132	36.2821	217.599	0.049943	0.115773	2.31811	0.0204432	0.0603164	7.56772	0.603579	0.0227348
P12_Ferment. pyruvate and glycerol	Bread_Legumes	205	205	-0.0736819	0.691941	0.134039	0.068347	0.0512633	0.217326	Bread_Legumes	126	126	0.0277121	0.583927	0.123091	0.0819414	0.135676	0.46733	Bread_Legumes	223	223	-0.116311	0.444079	-0.0335153	0.0747241	0.654225	0.96661	Bread_Legumes	871	871	0.0435099	0.579569	0.0455328	0.027122	0.0935501	0.414293	Bread_Legumes	214.072	148.934	179.093	1359.43	0.0229324	0.0541263	2.36026	0.0182622	0.0603164	3.55144	0.155272	0.169362
P20_Terpenoid synthesis via mevalonate	Bread_Legumes	205	205	-0.0736819	0.691941	-0.116321	0.102989	0.260068	0.447896	Bread_Legumes	126	126	0.0277121	0.583927	-0.356008	0.14893	0.018384	0.363356	Bread_Legumes	223	223	-0.116311	0.444079	-0.0712009	0.155773	0.64807	0.96661	Bread_Legumes	871	871	0.0435099	0.579569	-0.0701411	0.0612247	0.252263	0.58479	Bread_Legumes	94.2793	45.0854	41.2113	266.776	0.0472798	-0.108782	-2.30081	0.0214026	0.0603164	3.21753	0.0676083	0.200134
P30_Mannan degradation	Bread_Legumes	205	205	-0.0736819	0.691941	0.301117	0.154855	0.0532438	0.217326	Bread_Legumes	126	126	0.0277121	0.583927	0.0656896	0.19167	0.732407	0.834951	Bread_Legumes	223	223	-0.116311	0.444079	0.0963601	0.166577	0.563546	0.96661	Bread_Legumes	871	871	0.0435099	0.579569	0.0890698	0.0517262	0.0854369	0.414293	Bread_Legumes	41.7012	27.2203	36.0386	373.747	0.0457051	0.106761	2.33587	0.0194983	0.0603164	1.74202	0	0.418528
P29_DMK synthesis	Bread_Legumes	205	205	-0.0736819	0.691941	0.151585	0.0890683	0.0903368	0.23337	Bread_Legumes	126	126	0.0277121	0.583927	0.183587	0.118866	0.125103	0.46733	Bread_Legumes	223	223	-0.116311	0.444079	0.100296	0.117999	0.396277	0.96661	Bread_Legumes	871	871	0.0435099	0.579569	0.0524752	0.0469584	0.264099	0.58479	Bread_Legumes	126.053	70.7761	71.8191	453.495	0.0372125	0.0873812	2.34817	0.0188658	0.0603164	1.73921	0	0.419117
P14_Sucrose degradation, heme synthesis (aerobic)	Wine_Alcohol	205	205	-0.27214	0.559289	-0.15653	0.105487	0.139424	0.20696	Wine_Alcohol	126	126	-0.21131	0.583969	-0.25448	0.135485	0.0627693	0.516421	Wine_Alcohol	223	223	-0.0117566	0.664384	-0.0777152	0.0765521	0.311144	0.889056	Wine_Alcohol	871	871	0.0981863	0.783786	-0.0605764	0.0330791	0.067406	0.267567	Wine_Alcohol	89.8666	54.4773	170.642	913.886	0.0285264	-0.0785693	-2.75427	0.00588235	0.0607843	2.52797	0	0.282526
P31_Anhydromuropeptides recycling	Wine_Alcohol	205	205	-0.27214	0.559289	-0.182905	0.0984878	0.0647703	0.131852	Wine_Alcohol	126	126	-0.21131	0.583969	-0.142063	0.150254	0.346311	0.670977	Wine_Alcohol	223	223	-0.0117566	0.664384	-0.110169	0.0994472	0.269166	0.889056	Wine_Alcohol	871	871	0.0981863	0.783786	-0.089945	0.0441914	0.0421199	0.21762	Wine_Alcohol	103.094	44.2941	101.115	512.064	0.0362603	-0.10827	-2.9859	0.00282741	0.0607843	0.797171	0	0.671269
P28_UTP and CTP degradation	Wine_Alcohol	205	205	-0.27214	0.559289	-0.0746008	0.147003	0.612381	0.612381	Wine_Alcohol	126	126	-0.21131	0.583969	-0.113085	0.149528	0.450962	0.721901	Wine_Alcohol	223	223	-0.0117566	0.664384	-0.0471096	0.0929504	0.612792	0.889056	Wine_Alcohol	871	871	0.0981863	0.783786	-0.103296	0.0388762	0.00802819	0.0763687	Wine_Alcohol	46.2752	44.7257	115.744	661.655	0.0339344	-0.0947823	-2.7931	0.00522051	0.0607843	0.344837	0	0.841627
P6_Ferment. glutamate and pyruvate	Fish_Nuts	205	205	-0.135461	0.55016	0.14126	0.115466	0.222632	0.476394	Fish_Nuts	126	126	0.0141888	0.575752	0.043888	0.160126	0.784491	0.838594	Fish_Nuts	223	223	0.0520077	0.656703	0.144574	0.0906417	0.112166	0.634812	Fish_Nuts	871	871	0.0168252	0.570004	0.0693343	0.0480608	0.149485	0.398971	Fish_Nuts	75.0047	39.0011	121.715	432.93	0.0386723	0.0896141	2.31727	0.0204891	0.0635163	0.82731	0	0.661229
P1_AA-synthesis and starch degradation	Fish_Nuts	205	205	-0.135461	0.55016	0.106713	0.131536	0.418177	0.58925	Fish_Nuts	126	126	0.0141888	0.575752	0.123922	0.156585	0.430268	0.596453	Fish_Nuts	223	223	0.0520077	0.656703	0.0860999	0.101997	0.399518	0.884647	Fish_Nuts	871	871	0.0168252	0.570004	0.0990156	0.0555526	0.0750387	0.318336	Fish_Nuts	57.7976	40.785	96.1233	324.035	0.0439061	0.0994382	2.26479	0.0235253	0.0662987	0.0446676	0	0.977914
P17_Polyamine synthesis	Vegetables_Fruit_Tea	205	205	-0.11222	0.77642	0.172106	0.0939546	0.0684761	0.326719	Vegetables_Fruit_Tea	126	126	-0.000156026	0.675955	0.192589	0.141422	0.17581	0.692696	Vegetables_Fruit_Tea	223	223	0.0418139	0.681131	0.0558608	0.0943507	0.55443	0.992246	Vegetables_Fruit_Tea	871	871	0.0161285	0.690431	0.110798	0.0501156	0.027307	0.198593	Vegetables_Fruit_Tea	113.283	49.9995	112.334	398.156	0.0385251	0.118016	3.06336	0.00218864	0.0678479	1.06421	0	0.587368
P21_Glycogen degradation	Bread_Legumes	205	205	-0.0736819	0.691941	0.352768	0.142642	0.0142329	0.159462	Bread_Legumes	126	126	0.0277121	0.583927	0.331819	0.207471	0.112373	0.46733	Bread_Legumes	223	223	-0.116311	0.444079	-0.0063777	0.152182	0.96661	0.96661	Bread_Legumes	871	871	0.0435099	0.579569	0.0656654	0.0585704	0.262541	0.58479	Bread_Legumes	49.1478	23.2319	43.179	291.503	0.0495644	0.107878	2.17651	0.0295169	0.076252	5.19561	0.42259	0.0744366
P2_Aerobic respiration, ECA-, LPS-, heme-synthesis	Meat_Potatoes_Gravy	205	205	0.0092388	0.66643	-0.0128964	0.0881586	0.883843	0.989803	Meat_Potatoes_Gravy	126	126	0.0317397	0.612627	0.198207	0.0727427	0.00743128	0.115185	Meat_Potatoes_Gravy	223	223	-0.12186	0.546907	-0.0436977	0.0784445	0.578065	0.853335	Meat_Potatoes_Gravy	871	871	0.0247565	0.537179	0.0955207	0.0342948	0.00546497	0.169414	Meat_Potatoes_Gravy	128.668	188.983	162.508	850.245	0.0274163	0.0826163	3.0134	0.00258334	0.0800836	6.43326	0.533674	0.0400898
P1_AA-synthesis and starch degradation	Spreads_sweet	205	205	-0.0555374	0.536875	-0.036059	0.148068	0.807847	0.858992	Spreads_sweet	126	126	0.0129582	0.465282	-0.0402224	0.200925	0.841674	0.94189	Spreads_sweet	223	223	-0.0241369	0.470388	-0.110983	0.152573	0.467762	0.965036	Spreads_sweet	871	871	0.0180257	0.519839	-0.15498	0.0618004	0.0123326	0.0955773	Spreads_sweet	45.6117	24.7704	42.9578	261.829	0.0516282	-0.127907	-2.47747	0.0132316	0.0820361	0.779444	0	0.677245
P8_Creatinine degradation I	Fish_Nuts	205	205	-0.135461	0.55016	0.106231	0.110905	0.339297	0.52591	Fish_Nuts	126	126	0.0141888	0.575752	0.145625	0.144255	0.314765	0.596453	Fish_Nuts	223	223	0.0520077	0.656703	0.0202174	0.102489	0.843806	0.940283	Fish_Nuts	871	871	0.0168252	0.570004	0.110543	0.0617589	0.0738188	0.318336	Fish_Nuts	81.3017	48.0552	95.2016	262.18	0.0453265	0.0956194	2.10957	0.0348954	0.0901465	0.728976	0	0.694552
P14_Sucrose degradation, heme synthesis (aerobic)	Dairy_Cereals	205	205	-0.161259	0.558239	0.0942565	0.110929	0.396511	0.826632	Dairy_Cereals	126	126	-0.0521211	0.621192	0.246631	0.128158	0.0566681	0.442063	Dairy_Cereals	223	223	-0.0111794	0.671357	0.129816	0.0808037	0.109606	0.846927	Dairy_Cereals	871	871	0.0462207	0.622802	0.068488	0.0433051	0.114124	0.917007	Dairy_Cereals	81.2665	60.885	153.157	533.239	0.0347409	0.0954425	2.74727	0.00600943	0.0931462	1.9602	0	0.375274
P25_L-tyrosine synthesis	Meat_Potatoes_Gravy	205	205	0.0092388	0.66643	-0.112762	0.122555	0.358639	0.989803	Meat_Potatoes_Gravy	126	126	0.0317397	0.612627	0.680503	0.183932	0.000327053	0.0101386	Meat_Potatoes_Gravy	223	223	-0.12186	0.546907	0.228432	0.145121	0.116926	0.602171	Meat_Potatoes_Gravy	871	871	0.0247565	0.537179	0.135244	0.0714406	0.0586781	0.293558	Meat_Potatoes_Gravy	66.5787	29.5586	47.4831	195.934	0.0542682	0.147113	2.71085	0.00671119	0.104023	NS	NS	NS
P16_Bifidobacterium shunt	Wine_Alcohol	205	205	-0.27214	0.559289	0.345856	0.131426	0.00916539	0.0673133	Wine_Alcohol	126	126	-0.21131	0.583969	0.152484	0.159783	0.341843	0.670977	Wine_Alcohol	223	223	-0.0117566	0.664384	-0.0360136	0.10027	0.719821	0.889056	Wine_Alcohol	871	871	0.0981863	0.783786	0.0761081	0.0418094	0.0690496	0.267567	Wine_Alcohol	57.8943	39.1684	99.4617	572.074	0.0360703	0.0858096	2.37895	0.0173619	0.107644	NS	NS	NS
P13_Ferment. to butanoate	Wine_Alcohol	205	205	-0.27214	0.559289	-0.148654	0.0870206	0.0891476	0.153532	Wine_Alcohol	126	126	-0.21131	0.583969	0.211771	0.114412	0.066635	0.516421	Wine_Alcohol	223	223	-0.0117566	0.664384	0.0195544	0.0704014	0.781464	0.889056	Wine_Alcohol	871	871	0.0981863	0.783786	-0.084441	0.0295055	0.00431305	0.0763687	Wine_Alcohol	132.055	76.3937	201.761	1148.67	0.0253276	-0.0619047	-2.44416	0.014519	0.107644	NS	NS	NS
P3_AA-synthesis	Fish_Nuts	205	205	-0.135461	0.55016	0.120093	0.0977313	0.220595	0.476394	Fish_Nuts	126	126	0.0141888	0.575752	0.0597168	0.108538	0.583212	0.695368	Fish_Nuts	223	223	0.0520077	0.656703	0.0691862	0.0755334	0.3607	0.884647	Fish_Nuts	871	871	0.0168252	0.570004	0.0541167	0.0409854	0.187054	0.398971	Fish_Nuts	104.697	84.8853	175.276	595.307	0.0322721	0.0645568	2.00039	0.0454582	0.1084	NS	NS	NS
P20_Terpenoid synthesis via mevalonate	Sweetened_tea_yoghurtdrink	205	205	0.111425	1.12755	0.115247	0.057972	0.0481849	0.270679	Sweetened_tea_yoghurtdrink	126	126	0.0674218	0.540567	0.180113	0.155621	0.249416	0.580409	Sweetened_tea_yoghurtdrink	223	223	0.00250442	0.480442	0.127024	0.131205	0.334056	0.99476	Sweetened_tea_yoghurtdrink	871	871	-0.0373747	0.434722	0.0176039	0.0726474	0.80859	0.90899	Sweetened_tea_yoghurtdrink	297.553	41.2916	58.0893	189.479	0.0412951	0.0894311	2.16566	0.0303371	0.117556	NS	NS	NS
P10_FA and beta-oxidation	Fish_Nuts	205	205	-0.135461	0.55016	0.109595	0.0617815	0.0776155	0.312482	Fish_Nuts	126	126	0.0141888	0.575752	0.155039	0.0890511	0.0842881	0.326616	Fish_Nuts	223	223	0.0520077	0.656703	0.0278418	0.0416939	0.504995	0.940283	Fish_Nuts	871	871	0.0168252	0.570004	0.0204779	0.0241812	0.397316	0.684266	Fish_Nuts	261.989	126.102	575.249	1710.18	0.0193401	0.0371421	1.92047	0.0547983	0.121339	NS	NS	NS
P16_Bifidobacterium shunt	Eggs_Alcoholic_drinks	205	205	-0.104303	0.43925	0.459222	0.171174	0.00791523	0.0886186	Eggs_Alcoholic_drinks	126	126	-0.134042	0.302491	0.69835	0.328421	0.0355196	0.505429	Eggs_Alcoholic_drinks	223	223	-0.0546888	0.448173	-0.0628998	0.150493	0.676392	0.873112	Eggs_Alcoholic_drinks	871	871	0.0583724	0.606478	0.111826	0.0590927	0.0587729	0.364392	Eggs_Alcoholic_drinks	34.1293	9.27125	44.1535	286.373	0.0517138	0.137445	2.65779	0.00786537	0.121913	NS	NS	NS
P31_Anhydromuropeptides recycling	Eggs_Alcoholic_drinks	205	205	-0.104303	0.43925	-0.0471833	0.129422	0.715821	0.879842	Eggs_Alcoholic_drinks	126	126	-0.134042	0.302491	-0.0884095	0.314474	0.779091	0.922419	Eggs_Alcoholic_drinks	223	223	-0.0546888	0.448173	-0.136888	0.149407	0.360573	0.70834	Eggs_Alcoholic_drinks	871	871	0.0583724	0.606478	-0.15052	0.062409	0.0160802	0.166162	Eggs_Alcoholic_drinks	59.7008	10.1119	44.7982	256.747	0.0518924	-0.130571	-2.51619	0.011863	0.122584	NS	NS	NS
P6_Ferment. glutamate and pyruvate	Pasta_Pizza	205	205	-0.126846	0.636288	0.298977	0.104762	0.00477615	0.0164512	Pasta_Pizza	126	126	-0.0709619	0.607965	0.311533	0.169687	0.0688431	0.928157	Pasta_Pizza	223	223	0.00315542	0.506156	0.109393	0.140346	0.436563	0.734359	Pasta_Pizza	871	871	0.0399249	0.617093	0.060329	0.0512993	0.239911	0.857822	Pasta_Pizza	91.1149	34.73	50.769	379.994	0.0423863	0.119544	2.82035	0.00479709	0.127209	NS	NS	NS
P18_Formaldehyde assimilation	Pasta_Pizza	205	205	-0.126846	0.636288	0.549821	0.112825	2.23795e-06	6.93764e-05	Pasta_Pizza	126	126	-0.0709619	0.607965	0.0274772	0.163818	0.867078	0.933709	Pasta_Pizza	223	223	0.00315542	0.506156	0.155232	0.143264	0.279773	0.734359	Pasta_Pizza	871	871	0.0399249	0.617093	0.0222387	0.0543102	0.682292	0.857822	Pasta_Pizza	78.5584	37.2627	48.7223	339.029	0.0445624	0.117798	2.64343	0.00820706	0.127209	NS	NS	NS
P24_L-phenylalanine synthesis	Bread_Legumes	205	205	-0.0736819	0.691941	-0.191584	0.105608	0.0711677	0.217326	Bread_Legumes	126	126	0.0277121	0.583927	-0.213812	0.176537	0.22822	0.546841	Bread_Legumes	223	223	-0.116311	0.444079	0.11344	0.156053	0.468052	0.96661	Bread_Legumes	871	871	0.0435099	0.579569	-0.083434	0.0673006	0.215415	0.58479	Bread_Legumes	89.6612	32.0868	41.0633	220.781	0.0510582	-0.0985439	-1.93003	0.0536029	0.127822	NS	NS	NS
P6_Ferment. glutamate and pyruvate	Dairy_Lean_beef	205	205	-0.201195	0.55624	0.215938	0.116445	0.0651579	0.796221	Dairy_Lean_beef	126	126	-0.146976	0.56817	0.039799	0.162798	0.807285	0.942544	Dairy_Lean_beef	223	223	0.0254258	0.537627	-0.00374371	0.11836	0.974796	0.974796	Dairy_Lean_beef	871	871	0.0612162	0.608226	0.0933664	0.0459529	0.0424806	0.26338	Dairy_Lean_beef	73.7496	37.7315	71.3826	473.559	0.0390309	0.0934981	2.39549	0.0165981	0.128635	NS	NS	NS
P22_Peptidoglycan synthesis IV (Enterococcus faecium)	Meat	205	205	0.0153272	0.592254	0.170467	0.123339	0.168491	0.354997	Meat	126	126	0.00509592	0.600788	0.396089	0.16656	0.0189831	0.294238	Meat	223	223	-0.0138947	0.560121	0.207883	0.118633	0.0811316	0.283221	Meat	871	871	-0.0016754	0.624155	0.0734944	0.0581875	0.206907	0.670365	Meat	65.7349	36.0462	71.0539	295.352	0.0462158	0.132342	2.86357	0.00418901	0.129859	NS	NS	NS
P18_Formaldehyde assimilation	Porridge_ready_Fish_fried_Chocolatemilk	205	205	0.0773975	0.762121	0.111295	0.0930924	0.2333	0.516594	Porridge_ready_Fish_fried_Chocolatemilk	126	126	0.129518	0.829902	0.0390611	0.108075	0.718416	0.975487	Porridge_ready_Fish_fried_Chocolatemilk	223	223	-0.0295003	0.594099	0.207771	0.1032	0.0453207	0.428588	Porridge_ready_Fish_fried_Chocolatemilk	871	871	-0.0289628	0.569582	0.0878944	0.0508185	0.0840629	0.461559	Porridge_ready_Fish_fried_Chocolatemilk	115.391	85.6154	93.8941	387.219	0.0382886	0.102225	2.66985	0.00758856	0.134827	NS	NS	NS
P22_Peptidoglycan synthesis IV (Enterococcus faecium)	Porridge_ready_Fish_fried_Chocolatemilk	205	205	0.0773975	0.762121	0.162129	0.0929362	0.0826123	0.389822	Porridge_ready_Fish_fried_Chocolatemilk	126	126	0.129518	0.829902	0.0891654	0.124095	0.47383	0.975487	Porridge_ready_Fish_fried_Chocolatemilk	223	223	-0.0295003	0.594099	0.00639851	0.110461	0.953861	0.953861	Porridge_ready_Fish_fried_Chocolatemilk	871	871	-0.0289628	0.569582	0.106535	0.060317	0.0777067	0.461559	Porridge_ready_Fish_fried_Chocolatemilk	115.779	64.9368	81.9555	274.866	0.0431316	0.101144	2.345	0.0190271	0.134827	NS	NS	NS
P20_Terpenoid synthesis via mevalonate	Porridge_ready_Fish_fried_Chocolatemilk	205	205	0.0773975	0.762121	0.178606	0.0813004	0.0291849	0.301578	Porridge_ready_Fish_fried_Chocolatemilk	126	126	0.129518	0.829902	-0.0442	0.102209	0.666192	0.975487	Porridge_ready_Fish_fried_Chocolatemilk	223	223	-0.0295003	0.594099	0.13859	0.106912	0.19625	0.608375	Porridge_ready_Fish_fried_Chocolatemilk	871	871	-0.0289628	0.569582	0.0909602	0.0558281	0.103616	0.461559	Porridge_ready_Fish_fried_Chocolatemilk	151.292	95.7243	87.4872	320.844	0.0390629	0.0978099	2.50391	0.012283	0.134827	NS	NS	NS
P13_Ferment. to butanoate	Porridge_ready_Fish_fried_Chocolatemilk	205	205	0.0773975	0.762121	-0.139237	0.063213	0.0287669	0.301578	Porridge_ready_Fish_fried_Chocolatemilk	126	126	0.129518	0.829902	-0.0377286	0.0847888	0.657142	0.975487	Porridge_ready_Fish_fried_Chocolatemilk	223	223	-0.0295003	0.594099	-0.11813	0.0802069	0.142249	0.551215	Porridge_ready_Fish_fried_Chocolatemilk	871	871	-0.0289628	0.569582	-0.0319062	0.0415343	0.442585	0.833965	Porridge_ready_Fish_fried_Chocolatemilk	250.258	139.099	155.445	579.676	0.0298212	-0.0684327	-2.29477	0.0217463	0.134827	NS	NS	NS
P6_Ferment. glutamate and pyruvate	Porridge_ready_Fish_fried_Chocolatemilk	205	205	0.0773975	0.762121	-0.0515262	0.0835766	0.53826	0.781524	Porridge_ready_Fish_fried_Chocolatemilk	126	126	0.129518	0.829902	-0.11418	0.113076	0.314644	0.975487	Porridge_ready_Fish_fried_Chocolatemilk	223	223	-0.0295003	0.594099	-0.108155	0.101641	0.288473	0.638055	Porridge_ready_Fish_fried_Chocolatemilk	871	871	-0.0289628	0.569582	-0.0837027	0.0480337	0.0817619	0.461559	Porridge_ready_Fish_fried_Chocolatemilk	143.163	78.2088	96.7969	433.419	0.0364762	-0.0838942	-2.29997	0.02145	0.134827	NS	NS	NS
P14_Sucrose degradation, heme synthesis (aerobic)	Bread_Legumes	205	205	-0.0736819	0.691941	-0.19987	0.0961757	0.0389764	0.217326	Bread_Legumes	126	126	0.0277121	0.583927	-0.309326	0.147129	0.0376076	0.367008	Bread_Legumes	223	223	-0.116311	0.444079	-0.0494725	0.127511	0.698406	0.96661	Bread_Legumes	871	871	0.0435099	0.579569	-0.0169975	0.0508991	0.738502	0.789433	Bread_Legumes	108.111	46.1958	61.5044	385.994	0.0407636	-0.0756082	-1.8548	0.0636252	0.140884	NS	NS	NS
P22_Peptidoglycan synthesis IV (Enterococcus faecium)	Meat_Potatoes_Gravy	205	205	0.0092388	0.66643	0.10494	0.124568	0.400558	0.989803	Meat_Potatoes_Gravy	126	126	0.0317397	0.612627	0.158869	0.194424	0.415475	0.617696	Meat_Potatoes_Gravy	223	223	-0.12186	0.546907	0.275181	0.139185	0.0492979	0.602171	Meat_Potatoes_Gravy	871	871	0.0247565	0.537179	0.0891184	0.0727771	0.221082	0.48731	Meat_Potatoes_Gravy	64.4444	26.4547	51.6198	188.804	0.0549382	0.126753	2.3072	0.0210437	0.150661	NS	NS	NS
P24_L-phenylalanine synthesis	Meat_Potatoes_Gravy	205	205	0.0092388	0.66643	0.0208185	0.11299	0.854004	0.989803	Meat_Potatoes_Gravy	126	126	0.0317397	0.612627	0.244548	0.185508	0.189927	0.392516	Meat_Potatoes_Gravy	223	223	-0.12186	0.546907	0.152053	0.136401	0.266191	0.602171	Meat_Potatoes_Gravy	871	871	0.0247565	0.537179	0.135989	0.0739553	0.0662872	0.293558	Meat_Potatoes_Gravy	78.3289	29.0585	53.7483	182.836	0.0539186	0.121444	2.25235	0.0243001	0.150661	NS	NS	NS
P9_Enterobactin-, LPS-, quinone-synthesis (E.coli)	Meat_Potatoes_Gravy	205	205	0.0092388	0.66643	-0.0515078	0.110967	0.643033	0.989803	Meat_Potatoes_Gravy	126	126	0.0317397	0.612627	0.324011	0.128821	0.0132185	0.136591	Meat_Potatoes_Gravy	223	223	-0.12186	0.546907	-0.0683995	0.116027	0.556129	0.853335	Meat_Potatoes_Gravy	871	871	0.0247565	0.537179	0.13369	0.0533996	0.012478	0.193409	Meat_Potatoes_Gravy	81.2099	60.2598	74.282	350.69	0.0420167	0.100884	2.40103	0.0163488	0.150661	NS	NS	NS
P24_L-phenylalanine synthesis	Porridge_ready_Fish_fried_Chocolatemilk	205	205	0.0773975	0.762121	0.145172	0.0841694	0.0861228	0.389822	Porridge_ready_Fish_fried_Chocolatemilk	126	126	0.129518	0.829902	0.130837	0.118584	0.272095	0.975487	Porridge_ready_Fish_fried_Chocolatemilk	223	223	-0.0295003	0.594099	0.013669	0.107594	0.899024	0.928992	Porridge_ready_Fish_fried_Chocolatemilk	871	871	-0.0289628	0.569582	0.0771097	0.0614146	0.209615	0.649805	Porridge_ready_Fish_fried_Chocolatemilk	141.154	71.1125	86.3825	265.129	0.0421159	0.091207	2.16562	0.0303403	0.156758	NS	NS	NS
P14_Sucrose degradation, heme synthesis (aerobic)	Cheese_Butter	205	205	-0.0931494	0.425837	-0.138928	0.136623	0.31045	0.55791	Cheese_Butter	126	126	-0.00880917	0.675371	-0.309192	0.117539	0.00964272	0.179018	Cheese_Butter	223	223	-0.0538434	0.563146	-0.083986	0.0933228	0.369144	0.932114	Cheese_Butter	871	871	0.0356952	0.679706	-0.0573958	0.0392846	0.144372	0.497281	Cheese_Butter	53.5738	72.3825	114.822	647.97	0.0335437	-0.0862529	-2.57136	0.0101299	0.157014	NS	NS	NS
P8_Creatinine degradation I	Wine_Alcohol	205	205	-0.27214	0.559289	0.111468	0.109644	0.310565	0.418587	Wine_Alcohol	126	126	-0.21131	0.583969	-0.00364028	0.140431	0.979363	0.979363	Wine_Alcohol	223	223	-0.0117566	0.664384	-0.11257	0.099787	0.260523	0.889056	Wine_Alcohol	871	871	0.0981863	0.783786	0.11375	0.0439762	0.00985402	0.0763687	Wine_Alcohol	83.1816	50.7075	100.427	517.089	0.0364807	0.0753274	2.06486	0.0389364	0.161338	NS	NS	NS
P23_L-glutamine synthesis	Wine_Alcohol	205	205	-0.27214	0.559289	0.1908	0.134524	0.157657	0.222152	Wine_Alcohol	126	126	-0.21131	0.583969	-0.0954565	0.160052	0.552024	0.744033	Wine_Alcohol	223	223	-0.0117566	0.664384	-0.112289	0.0987698	0.256846	0.889056	Wine_Alcohol	871	871	0.0981863	0.783786	-0.0900187	0.0416078	0.0307753	0.190807	Wine_Alcohol	55.2586	39.0373	102.507	577.632	0.0359342	-0.0732031	-2.03714	0.0416356	0.161338	NS	NS	NS
P24_L-phenylalanine synthesis	Wine_Alcohol	205	205	-0.27214	0.559289	-0.238176	0.114944	0.0395454	0.102159	Wine_Alcohol	126	126	-0.21131	0.583969	-0.302842	0.160607	0.0617664	0.516421	Wine_Alcohol	223	223	-0.0117566	0.664384	-0.103566	0.0937285	0.270401	0.889056	Wine_Alcohol	871	871	0.0981863	0.783786	-0.0312425	0.0438464	0.47632	0.838228	Wine_Alcohol	75.6878	38.7676	113.83	520.155	0.0365529	-0.077237	-2.11302	0.0345989	0.161338	NS	NS	NS
P14_Sucrose degradation, heme synthesis (aerobic)	Dairy_Lean_beef	205	205	-0.201195	0.55624	-0.0533306	0.108623	0.62399	0.936721	Dairy_Lean_beef	126	126	-0.146976	0.56817	0.0692856	0.144021	0.631336	0.942544	Dairy_Lean_beef	223	223	0.0254258	0.537627	-0.0290188	0.102005	0.776312	0.952536	Dairy_Lean_beef	871	871	0.0612162	0.608226	0.126274	0.0442595	0.00443377	0.137447	Dairy_Lean_beef	84.7529	48.2113	96.1065	510.49	0.0367716	0.0817958	2.22443	0.0261198	0.161943	NS	NS	NS
P1_AA-synthesis and starch degradation	Cheese_Butter	205	205	-0.0931494	0.425837	0.157641	0.168195	0.349771	0.55791	Cheese_Butter	126	126	-0.00880917	0.675371	0.0244329	0.133811	0.855426	0.88394	Cheese_Butter	223	223	-0.0538434	0.563146	0.0526668	0.121492	0.665082	0.932114	Cheese_Butter	871	871	0.0356952	0.679706	0.10764	0.046991	0.0222234	0.344463	Cheese_Butter	35.3486	55.8491	67.7493	452.867	0.0404287	0.0968461	2.39548	0.0165988	0.164038	NS	NS	NS
P16_Bifidobacterium shunt	Cheese_Butter	205	205	-0.0931494	0.425837	0.167899	0.17224	0.330846	0.55791	Cheese_Butter	126	126	-0.00880917	0.675371	0.120907	0.140609	0.391571	0.88394	Cheese_Butter	223	223	-0.0538434	0.563146	0.117613	0.12195	0.335901	0.932114	Cheese_Butter	871	871	0.0356952	0.679706	0.0801333	0.049638	0.106815	0.473039	Cheese_Butter	33.7078	50.5795	67.2409	405.856	0.0423568	0.0936624	2.21127	0.027017	0.164038	NS	NS	NS
P3_AA-synthesis	Cheese_Butter	205	205	-0.0931494	0.425837	0.136548	0.12491	0.275641	0.55791	Cheese_Butter	126	126	-0.00880917	0.675371	0.0297518	0.0926012	0.748549	0.88394	Cheese_Butter	223	223	-0.0538434	0.563146	0.0145405	0.0900304	0.871845	0.961096	Cheese_Butter	871	871	0.0356952	0.679706	0.0705411	0.0346562	0.0421093	0.43513	Cheese_Butter	64.0925	116.618	123.373	832.604	0.0296606	0.064	2.15775	0.0309475	0.164038	NS	NS	NS
P5_Biotin and FA-synthesis (E. coli)	Cheese_Butter	205	205	-0.0931494	0.425837	-0.230123	0.132212	0.0833052	0.368923	Cheese_Butter	126	126	-0.00880917	0.675371	-0.0706928	0.122018	0.563431	0.88394	Cheese_Butter	223	223	-0.0538434	0.563146	-0.107555	0.104996	0.3068	0.932114	Cheese_Butter	871	871	0.0356952	0.679706	-0.0582065	0.0432199	0.178413	0.539473	Cheese_Butter	57.2085	67.1661	90.7098	535.343	0.0365044	-0.0783952	-2.14755	0.0317492	0.164038	NS	NS	NS
P19_Biotin biosynthesis II (Bacillus subtilis)	Spreads_sweet	205	205	-0.0555374	0.536875	0.108047	0.127039	0.396068	0.767382	Spreads_sweet	126	126	0.0129582	0.465282	0.1373	0.190171	0.471711	0.94189	Spreads_sweet	223	223	-0.0241369	0.470388	-0.0114614	0.153189	0.940428	0.968561	Spreads_sweet	871	871	0.0180257	0.519839	0.133469	0.0689754	0.0533138	0.287855	Spreads_sweet	61.9616	27.6509	42.6132	210.19	0.054041	0.111142	2.05662	0.0397232	0.16446	NS	NS	NS
P28_UTP and CTP degradation	Spreads_sweet	205	205	-0.0555374	0.536875	0.0486764	0.159618	0.760719	0.858992	Spreads_sweet	126	126	0.0129582	0.465282	-0.014457	0.197912	0.94189	0.94189	Spreads_sweet	223	223	-0.0241369	0.470388	0.26041	0.141325	0.0667473	0.689722	Spreads_sweet	871	871	0.0180257	0.519839	0.0998815	0.0608686	0.101174	0.287855	Spreads_sweet	39.2497	25.5304	50.0679	269.907	0.050981	0.107961	2.11766	0.0342035	0.16446	NS	NS	NS
P5_Biotin and FA-synthesis (E. coli)	Spreads_sweet	205	205	-0.0555374	0.536875	0.0612578	0.111877	0.584619	0.858992	Spreads_sweet	126	126	0.0129582	0.465282	0.237992	0.182188	0.193948	0.897772	Spreads_sweet	223	223	-0.0241369	0.470388	0.0689422	0.132197	0.602542	0.965036	Spreads_sweet	871	871	0.0180257	0.519839	0.0914424	0.056852	0.108106	0.287855	Spreads_sweet	79.8943	30.1274	57.2214	309.392	0.0458044	0.0929448	2.02917	0.0424412	0.16446	NS	NS	NS
P12_Ferment. pyruvate and glycerol	Cheese_Butter	205	205	-0.0931494	0.425837	0.224369	0.0960886	0.0205442	0.34038	Cheese_Butter	126	126	-0.00880917	0.675371	-0.000328921	0.0667349	0.996076	0.996076	Cheese_Butter	223	223	-0.0538434	0.563146	0.0265774	0.0547679	0.627972	0.932114	Cheese_Butter	871	871	0.0356952	0.679706	0.0339974	0.0209575	0.105124	0.473039	Cheese_Butter	108.307	224.54	333.387	2276.78	0.0184333	0.0375438	2.03674	0.0416766	0.166209	NS	NS	NS
P2_Aerobic respiration, ECA-, LPS-, heme-synthesis	Cheese_Butter	205	205	-0.0931494	0.425837	-0.107183	0.116809	0.359942	0.55791	Cheese_Butter	126	126	-0.00880917	0.675371	-0.0155302	0.0571287	0.786224	0.88394	Cheese_Butter	223	223	-0.0538434	0.563146	-0.0348434	0.0656802	0.596307	0.932114	Cheese_Butter	871	871	0.0356952	0.679706	-0.0434949	0.0241525	0.0720754	0.473039	Cheese_Butter	73.2904	306.402	231.81	1714.26	0.0207356	-0.0409554	-1.97512	0.0482542	0.166209	NS	NS	NS
P9_Enterobactin-, LPS-, quinone-synthesis (E.coli)	Cheese_Butter	205	205	-0.0931494	0.425837	-0.240601	0.146423	0.101922	0.371521	Cheese_Butter	126	126	-0.00880917	0.675371	-0.0211183	0.101358	0.835306	0.88394	Cheese_Butter	223	223	-0.0538434	0.563146	-0.0234293	0.0972054	0.80976	0.932114	Cheese_Butter	871	871	0.0356952	0.679706	-0.0651141	0.0375804	0.0835124	0.473039	Cheese_Butter	46.6425	97.3389	105.832	708.071	0.0323105	-0.0645828	-1.99882	0.045628	0.166209	NS	NS	NS
P11_Mixed acid fermentation	Fastfood	205	205	0.059247	0.613728	-0.149845	0.190386	0.432183	0.991927	Fastfood	126	126	0.0181697	0.719587	0.51899	0.242602	0.0344402	0.52958	Fastfood	223	223	-0.0641103	0.381483	0.294424	0.222118	0.186389	0.444466	Fastfood	871	871	8.79047e-06	0.532809	0.18207	0.0839366	0.0303445	0.277958	Fastfood	27.5887	16.9907	20.2691	141.937	0.0695408	0.176483	2.53783	0.0111542	0.171171	NS	NS	NS
P13_Ferment. to butanoate	Fastfood	205	205	0.059247	0.613728	-0.0233124	0.116962	0.84222	0.991927	Fastfood	126	126	0.0181697	0.719587	-0.214137	0.163759	0.193497	0.692105	Fastfood	223	223	-0.0641103	0.381483	-0.603551	0.156736	0.000154977	0.0048043	Fastfood	871	871	8.79047e-06	0.532809	-0.076585	0.0644595	0.235116	0.697171	Fastfood	73.0983	37.2896	40.7063	240.673	0.0505227	-0.134492	-2.66201	0.00776754	0.171171	NS	NS	NS
P31_Anhydromuropeptides recycling	Fastfood	205	205	0.059247	0.613728	-0.235019	0.131511	0.0754487	0.991927	Fastfood	126	126	0.0181697	0.719587	-0.292014	0.212691	0.172328	0.692105	Fastfood	223	223	-0.0641103	0.381483	-0.109208	0.229327	0.634403	0.829501	Fastfood	871	871	8.79047e-06	0.532809	-0.104477	0.0963323	0.278424	0.697171	Fastfood	57.8195	22.1056	19.0148	107.76	0.0695553	-0.161485	-2.32168	0.0202504	0.171171	NS	NS	NS
P17_Polyamine synthesis	Fastfood	205	205	0.059247	0.613728	-0.0089446	0.175552	0.959415	0.991927	Fastfood	126	126	0.0181697	0.719587	-0.245471	0.217605	0.261544	0.776232	Fastfood	223	223	-0.0641103	0.381483	-0.0861532	0.215709	0.689994	0.855593	Fastfood	871	871	8.79047e-06	0.532809	-0.215814	0.0951114	0.02351	0.277958	Fastfood	32.4482	21.1185	21.4914	110.544	0.0734021	-0.168008	-2.28888	0.0220866	0.171171	NS	NS	NS
P13_Ferment. to butanoate	Bread_Legumes	205	205	-0.0736819	0.691941	-0.0466914	0.0802697	0.561439	0.669409	Bread_Legumes	126	126	0.0277121	0.583927	0.117536	0.126004	0.3528	0.546841	Bread_Legumes	223	223	-0.116311	0.444079	0.0979806	0.11686	0.402705	0.96661	Bread_Legumes	871	871	0.0435099	0.579569	0.0842384	0.0454393	0.0640988	0.414293	Bread_Legumes	155.202	62.9841	73.226	484.324	0.035904	0.0620439	1.72805	0.0839795	0.172502	NS	NS	NS
P3_AA-synthesis	Bread_Legumes	205	205	-0.0736819	0.691941	0.156753	0.0882179	0.0771156	0.217326	Bread_Legumes	126	126	0.0277121	0.583927	0.0919915	0.114508	0.423352	0.596542	Bread_Legumes	223	223	-0.116311	0.444079	0.0358852	0.122809	0.770411	0.96661	Bread_Legumes	871	871	0.0435099	0.579569	0.0337973	0.0449424	0.452248	0.771332	Bread_Legumes	128.495	76.2659	66.3039	495.093	0.0361277	0.0603921	1.67163	0.0945979	0.172502	NS	NS	NS
P26_Thiamin synthesis	Bread_Legumes	205	205	-0.0736819	0.691941	-0.15389	0.119572	0.199588	0.412483	Bread_Legumes	126	126	0.0277121	0.583927	-0.186799	0.18345	0.310604	0.546841	Bread_Legumes	223	223	-0.116311	0.444079	-0.17563	0.157691	0.266614	0.96661	Bread_Legumes	871	871	0.0435099	0.579569	-0.0402094	0.0642931	0.531868	0.771332	Bread_Legumes	69.9422	29.7142	40.2147	241.92	0.0511785	-0.0867081	-1.69423	0.0902216	0.172502	NS	NS	NS
P23_L-glutamine synthesis	Dairy_Cereals	205	205	-0.161259	0.558239	0.185267	0.141042	0.190509	0.721032	Dairy_Cereals	126	126	-0.0521211	0.621192	-0.0333541	0.151697	0.826343	0.918322	Dairy_Cereals	223	223	-0.0111794	0.671357	0.0807996	0.104793	0.441522	0.846927	Dairy_Cereals	871	871	0.0462207	0.622802	0.115667	0.0544488	0.0339263	0.525857	Dairy_Cereals	50.2691	43.4558	91.0617	337.306	0.0437649	0.103883	2.37366	0.0176128	0.181999	NS	NS	NS
P7_Colanic acid building blocks synthesis	Porridge_ready_Fish_fried_Chocolatemilk	205	205	0.0773975	0.762121	-0.0571341	0.0695982	0.412678	0.68885	Porridge_ready_Fish_fried_Chocolatemilk	126	126	0.129518	0.829902	-0.102245	0.103244	0.32401	0.975487	Porridge_ready_Fish_fried_Chocolatemilk	223	223	-0.0295003	0.594099	-0.124103	0.0839829	0.140933	0.551215	Porridge_ready_Fish_fried_Chocolatemilk	871	871	-0.0289628	0.569582	-0.0495019	0.0488426	0.311106	0.760182	Porridge_ready_Fish_fried_Chocolatemilk	206.445	93.814	141.781	419.182	0.0340755	-0.0693582	-2.03543	0.0418079	0.185149	NS	NS	NS
P25_L-tyrosine synthesis	Sugar_Sweets	205	205	0.184389	1.11711	0.091588	0.0720967	0.205443	0.636875	Sugar_Sweets	126	126	0.0308263	0.62208	-0.147119	0.162008	0.365649	0.928887	Sugar_Sweets	223	223	-0.0900997	0.489801	-0.048625	0.152212	0.749689	0.957766	Sugar_Sweets	871	871	-0.0242716	0.577625	0.185285	0.0622638	0.0030036	0.0465558	Sugar_Sweets	192.384	38.1	43.1619	257.946	0.0433721	0.10856	2.50299	0.0123151	0.190883	NS	NS	NS
P30_Mannan degradation	Sugar_Sweets	205	205	0.184389	1.11711	-0.0144243	0.0977735	0.882865	0.943752	Sugar_Sweets	126	126	0.0308263	0.62208	0.031573	0.168898	0.852027	0.928887	Sugar_Sweets	223	223	-0.0900997	0.489801	-0.0154663	0.152248	0.919179	0.957766	Sugar_Sweets	871	871	-0.0242716	0.577625	-0.158124	0.0495367	0.00146361	0.0453718	Sugar_Sweets	104.606	35.0551	43.1414	407.517	0.0411582	-0.11097	-2.69618	0.00701404	0.190883	NS	NS	NS
P30_Mannan degradation	Fish_Nuts	205	205	-0.135461	0.55016	0.301192	0.171143	0.0799641	0.312482	Fish_Nuts	126	126	0.0141888	0.575752	-0.0554115	0.181438	0.76059	0.838594	Fish_Nuts	223	223	0.0520077	0.656703	0.0532922	0.102646	0.604162	0.940283	Fish_Nuts	871	871	0.0168252	0.570004	0.061534	0.0472386	0.193051	0.398971	Fish_Nuts	34.1413	30.3768	94.9107	448.132	0.04057	0.0678668	1.67283	0.0943602	0.195011	NS	NS	NS
P5_Biotin and FA-synthesis (E. coli)	Sweetened_tea_yoghurtdrink	205	205	0.111425	1.12755	0.0450401	0.0534768	0.400666	0.696408	Sweetened_tea_yoghurtdrink	126	126	0.0674218	0.540567	0.250202	0.153775	0.106345	0.366301	Sweetened_tea_yoghurtdrink	223	223	0.00250442	0.480442	0.113187	0.120902	0.350218	0.99476	Sweetened_tea_yoghurtdrink	871	871	-0.0373747	0.434722	0.0631847	0.0663545	0.341247	0.755618	Sweetened_tea_yoghurtdrink	349.679	42.2892	68.4124	227.122	0.0381384	0.0704353	1.84683	0.0647714	0.197255	NS	NS	NS
P12_Ferment. pyruvate and glycerol	Sweetened_tea_yoghurtdrink	205	205	0.111425	1.12755	-0.0362965	0.0390074	0.353244	0.696408	Sweetened_tea_yoghurtdrink	126	126	0.0674218	0.540567	-0.265156	0.081384	0.00145907	0.0308831	Sweetened_tea_yoghurtdrink	223	223	0.00250442	0.480442	0.0242038	0.0630524	0.701452	0.99476	Sweetened_tea_yoghurtdrink	871	871	-0.0373747	0.434722	-0.0227629	0.0323078	0.481271	0.809487	Sweetened_tea_yoghurtdrink	657.214	150.981	251.534	958.044	0.022262	-0.0394533	-1.77223	0.0763567	0.197255	NS	NS	NS
P19_Biotin biosynthesis II (Bacillus subtilis)	Sweetened_tea_yoghurtdrink	205	205	0.111425	1.12755	-0.157345	0.0598667	0.00925184	0.143404	Sweetened_tea_yoghurtdrink	126	126	0.0674218	0.540567	-0.134612	0.161014	0.404801	0.660465	Sweetened_tea_yoghurtdrink	223	223	0.00250442	0.480442	0.00919521	0.140296	0.947803	0.99476	Sweetened_tea_yoghurtdrink	871	871	-0.0373747	0.434722	0.0386207	0.0805895	0.631898	0.867476	Sweetened_tea_yoghurtdrink	279.016	38.572	50.8055	153.973	0.0437535	-0.0817058	-1.86741	0.0618438	0.197255	NS	NS	NS
P27_dTTP synthesis	Sweetened_tea_yoghurtdrink	205	205	0.111425	1.12755	-0.0737259	0.0738874	0.319581	0.696408	Sweetened_tea_yoghurtdrink	126	126	0.0674218	0.540567	-0.0518606	0.182769	0.777092	0.926532	Sweetened_tea_yoghurtdrink	223	223	0.00250442	0.480442	-0.0383599	0.135597	0.777526	0.99476	Sweetened_tea_yoghurtdrink	871	871	-0.0373747	0.434722	-0.118609	0.0757687	0.117852	0.577794	Sweetened_tea_yoghurtdrink	183.172	29.936	54.3876	174.189	0.0475821	-0.0855899	-1.79878	0.0720531	0.197255	NS	NS	NS
P27_dTTP synthesis	Eggs_Alcoholic_drinks	205	205	-0.104303	0.43925	0.151477	0.185577	0.415333	0.715499	Eggs_Alcoholic_drinks	126	126	-0.134042	0.302491	-0.1986	0.340374	0.560668	0.896758	Eggs_Alcoholic_drinks	223	223	-0.0546888	0.448173	-0.129038	0.144887	0.374126	0.70834	Eggs_Alcoholic_drinks	871	871	0.0583724	0.606478	0.155938	0.05866	0.00799773	0.123965	Eggs_Alcoholic_drinks	29.0371	8.6315	47.6364	290.613	0.0515767	0.111341	2.15874	0.0308701	0.207814	NS	NS	NS
P11_Mixed acid fermentation	Eggs_Alcoholic_drinks	205	205	-0.104303	0.43925	0.485881	0.183015	0.00857599	0.0886186	Eggs_Alcoholic_drinks	126	126	-0.134042	0.302491	0.286094	0.361816	0.430669	0.830735	Eggs_Alcoholic_drinks	223	223	-0.0546888	0.448173	0.135032	0.14521	0.353453	0.70834	Eggs_Alcoholic_drinks	871	871	0.0583724	0.606478	0.061093	0.0546325	0.26377	0.584061	Eggs_Alcoholic_drinks	29.8557	7.63879	47.4247	335.041	0.0487973	0.103734	2.12582	0.0335184	0.207814	NS	NS	NS
P15_Methanogenesis	Spreads_sweet	205	205	-0.0555374	0.536875	0.04345	0.0403006	0.282395	0.767382	Spreads_sweet	126	126	0.0129582	0.465282	0.0130287	0.159179	0.934903	0.94189	Spreads_sweet	223	223	-0.0241369	0.470388	0.115744	0.141389	0.413902	0.965036	Spreads_sweet	871	871	0.0180257	0.519839	0.0999918	0.0640045	0.118592	0.287855	Spreads_sweet	615.71	39.4665	50.0226	244.106	0.0324562	0.060534	1.8651	0.0621673	0.214132	NS	NS	NS
P1_AA-synthesis and starch degradation	Eggs_Alcoholic_drinks	205	205	-0.104303	0.43925	0.0928386	0.16964	0.58481	0.788222	Eggs_Alcoholic_drinks	126	126	-0.134042	0.302491	0.373446	0.315609	0.239047	0.673678	Eggs_Alcoholic_drinks	223	223	-0.0546888	0.448173	0.187809	0.149189	0.209429	0.70834	Eggs_Alcoholic_drinks	871	871	0.0583724	0.606478	0.0808126	0.056067	0.149846	0.464521	Eggs_Alcoholic_drinks	34.7493	10.0393	44.9292	318.116	0.0495175	0.100828	2.03621	0.0417289	0.215599	NS	NS	NS
P1_AA-synthesis and starch degradation	Meat_Potatoes_Gravy	205	205	0.0092388	0.66643	0.0193814	0.127441	0.879278	0.989803	Meat_Potatoes_Gravy	126	126	0.0317397	0.612627	-0.390635	0.170803	0.0239451	0.148459	Meat_Potatoes_Gravy	223	223	-0.12186	0.546907	0.113855	0.144969	0.43309	0.745878	Meat_Potatoes_Gravy	871	871	0.0247565	0.537179	-0.144138	0.0669172	0.0315182	0.271395	Meat_Potatoes_Gravy	61.5716	34.2776	47.5825	223.318	0.0522174	-0.106252	-2.03479	0.0418715	0.216336	NS	NS	NS
P22_Peptidoglycan synthesis IV (Enterococcus faecium)	Rolls_Spreads	205	205	0.00970005	1.07387	-0.121745	0.130671	0.352626	0.726473	Rolls_Spreads	126	126	0.0143831	0.689611	-0.896438	0.387216	0.0223073	0.345762	Rolls_Spreads	223	223	-0.16152	0.433979	0.0874216	0.327232	0.789604	0.94514	Rolls_Spreads	871	871	0.0374261	0.602796	-0.335418	0.135719	0.0136497	0.423142	Rolls_Spreads	58.5658	6.66951	9.33874	54.2896	0.0880917	-0.236701	-2.68699	0.00720998	0.223509	NS	NS	NS
P24_L-phenylalanine synthesis	Fastfood	205	205	0.059247	0.613728	0.0748071	0.154944	0.629768	0.991927	Fastfood	126	126	0.0181697	0.719587	0.0511531	0.231586	0.82556	0.964171	Fastfood	223	223	-0.0641103	0.381483	0.339908	0.215014	0.115366	0.357636	Fastfood	871	871	8.79047e-06	0.532809	0.158754	0.0952921	0.0960801	0.496414	Fastfood	41.6534	18.6456	21.6304	110.125	0.0721585	0.150504	2.08574	0.0370023	0.229414	NS	NS	NS
P28_UTP and CTP degradation	Fish_Nuts	205	205	-0.135461	0.55016	0.156912	0.148329	0.291401	0.501858	Fish_Nuts	126	126	0.0141888	0.575752	0.0160494	0.154609	0.917496	0.94808	Fish_Nuts	223	223	0.0520077	0.656703	-0.0819354	0.095091	0.38983	0.884647	Fish_Nuts	871	871	0.0168252	0.570004	-0.10283	0.0545975	0.0599776	0.318336	Fish_Nuts	45.4514	41.834	110.591	335.471	0.0433007	-0.0670383	-1.5482	0.121573	0.235548	NS	NS	NS
P14_Sucrose degradation, heme synthesis (aerobic)	Spreads_sweet	205	205	-0.0555374	0.536875	0.179328	0.11442	0.11864	0.735567	Spreads_sweet	126	126	0.0129582	0.465282	-0.0243058	0.181501	0.893693	0.94189	Spreads_sweet	223	223	-0.0241369	0.470388	0.133723	0.117157	0.254964	0.965036	Spreads_sweet	871	871	0.0180257	0.519839	0.0501848	0.0517341	0.332291	0.515051	Spreads_sweet	76.3824	30.3559	72.8553	373.634	0.0425156	0.0749291	1.76239	0.0780033	0.24181	NS	NS	NS
P25_L-tyrosine synthesis	Spreads_sweet	205	205	-0.0555374	0.536875	0.116499	0.136801	0.395459	0.767382	Spreads_sweet	126	126	0.0129582	0.465282	0.284449	0.222082	0.202723	0.897772	Spreads_sweet	223	223	-0.0241369	0.470388	-0.156661	0.153203	0.307648	0.965036	Spreads_sweet	871	871	0.0180257	0.519839	0.111917	0.0660673	0.090628	0.287855	Spreads_sweet	53.4348	20.2757	42.6055	229.101	0.0538057	0.0896256	1.66573	0.0957679	0.2474	NS	NS	NS
P3_AA-synthesis	Spreads_sweet	205	205	-0.0555374	0.536875	-0.0224611	0.105285	0.831283	0.858992	Spreads_sweet	126	126	0.0129582	0.465282	0.0195693	0.139098	0.888353	0.94189	Spreads_sweet	223	223	-0.0241369	0.470388	-0.0816997	0.113023	0.470543	0.965036	Spreads_sweet	871	871	0.0180257	0.519839	-0.0785624	0.0456385	0.0855343	0.287855	Spreads_sweet	90.2132	51.6842	78.2834	480.107	0.0377887	-0.0644435	-1.70536	0.0881266	0.2474	NS	NS	NS
P8_Creatinine degradation I	Eggs_Alcoholic_drinks	205	205	-0.104303	0.43925	0.227869	0.142356	0.111028	0.545366	Eggs_Alcoholic_drinks	126	126	-0.134042	0.302491	0.261347	0.29195	0.372485	0.830735	Eggs_Alcoholic_drinks	223	223	-0.0546888	0.448173	0.0571049	0.150172	0.704123	0.873112	Eggs_Alcoholic_drinks	871	871	0.0583724	0.606478	0.0702929	0.062359	0.259958	0.584061	Eggs_Alcoholic_drinks	49.3459	11.7323	44.3424	257.159	0.0525168	0.0963078	1.83385	0.0666768	0.251149	NS	NS	NS
P3_AA-synthesis	Eggs_Alcoholic_drinks	205	205	-0.104303	0.43925	0.0854734	0.126293	0.499328	0.715499	Eggs_Alcoholic_drinks	126	126	-0.134042	0.302491	0.335101	0.217605	0.126205	0.55971	Eggs_Alcoholic_drinks	223	223	-0.0546888	0.448173	0.101481	0.110702	0.360317	0.70834	Eggs_Alcoholic_drinks	871	871	0.0583724	0.606478	0.048566	0.0413462	0.240471	0.584061	Eggs_Alcoholic_drinks	62.6961	21.1184	81.5996	584.963	0.0365057	0.0654681	1.79337	0.0729142	0.251149	NS	NS	NS
P26_Thiamin synthesis	Eggs_Alcoholic_drinks	205	205	-0.104303	0.43925	-0.048012	0.170706	0.778806	0.879842	Eggs_Alcoholic_drinks	126	126	-0.134042	0.302491	-0.483131	0.34985	0.169856	0.658191	Eggs_Alcoholic_drinks	223	223	-0.0546888	0.448173	-0.0161986	0.142795	0.909787	0.943039	Eggs_Alcoholic_drinks	871	871	0.0583724	0.606478	-0.104587	0.0590828	0.0770485	0.398084	Eggs_Alcoholic_drinks	34.3165	8.17027	49.0429	286.47	0.0514345	-0.0961654	-1.86967	0.06153	0.251149	NS	NS	NS
P29_DMK synthesis	Wine_Alcohol	205	205	-0.27214	0.559289	0.144174	0.0973518	0.140199	0.20696	Wine_Alcohol	126	126	-0.21131	0.583969	0.0855796	0.109867	0.437549	0.721901	Wine_Alcohol	223	223	-0.0117566	0.664384	-0.024846	0.0710834	0.727028	0.889056	Wine_Alcohol	871	871	0.0981863	0.783786	-0.0794791	0.0304777	0.00927035	0.0763687	Wine_Alcohol	105.515	82.8452	197.908	1076.55	0.026146	-0.0466074	-1.78258	0.0746539	0.257141	NS	NS	NS
P19_Biotin biosynthesis II (Bacillus subtilis)	Sugar_Sweets	205	205	0.184389	1.11711	-0.0962416	0.066876	0.151692	0.636875	Sugar_Sweets	126	126	0.0308263	0.62208	-0.115259	0.138164	0.405813	0.928887	Sugar_Sweets	223	223	-0.0900997	0.489801	-0.0884555	0.151752	0.56057	0.874796	Sugar_Sweets	871	871	-0.0242716	0.577625	-0.0907415	0.0652964	0.164982	0.637924	Sugar_Sweets	223.594	52.3856	43.4241	234.542	0.042488	-0.0951009	-2.2383	0.0252014	0.260415	NS	NS	NS
P11_Mixed acid fermentation	Spreads_sweet	205	205	-0.0555374	0.536875	-0.0363561	0.155067	0.814874	0.858992	Spreads_sweet	126	126	0.0129582	0.465282	-0.164024	0.229155	0.475518	0.94189	Spreads_sweet	223	223	-0.0241369	0.470388	0.0058572	0.14844	0.968561	0.968561	Spreads_sweet	871	871	0.0180257	0.519839	-0.0976704	0.0603114	0.105718	0.287855	Spreads_sweet	41.5873	19.0433	45.3833	274.917	0.0512362	-0.0819596	-1.59964	0.109678	0.261539	NS	NS	NS
P28_UTP and CTP degradation	Eggs_Alcoholic_drinks	205	205	-0.104303	0.43925	-0.127061	0.1915	0.507773	0.715499	Eggs_Alcoholic_drinks	126	126	-0.134042	0.302491	0.305608	0.311391	0.328357	0.830735	Eggs_Alcoholic_drinks	223	223	-0.0546888	0.448173	0.12485	0.139347	0.371263	0.70834	Eggs_Alcoholic_drinks	871	871	0.0583724	0.606478	-0.125415	0.0550143	0.0228699	0.177241	Eggs_Alcoholic_drinks	27.2687	10.313	51.4997	330.406	0.0488248	-0.0842005	-1.72454	0.0846096	0.26229	NS	NS	NS
P2_Aerobic respiration, ECA-, LPS-, heme-synthesis	Sugar_Sweets	205	205	0.184389	1.11711	0.111983	0.0513542	0.0303858	0.636875	Sugar_Sweets	126	126	0.0308263	0.62208	-0.0153651	0.0624085	0.805961	0.928887	Sugar_Sweets	223	223	-0.0900997	0.489801	0.178652	0.0809866	0.0284369	0.251414	Sugar_Sweets	871	871	-0.0242716	0.577625	0.0203408	0.0301062	0.499453	0.918668	Sugar_Sweets	379.183	256.751	152.466	1103.28	0.022992	0.0466236	2.02782	0.0425782	0.263985	NS	NS	NS
P23_L-glutamine synthesis	Sugar_Sweets	205	205	0.184389	1.11711	-0.0423181	0.0774511	0.585413	0.749186	Sugar_Sweets	126	126	0.0308263	0.62208	-0.0226163	0.15387	0.883392	0.928887	Sugar_Sweets	223	223	-0.0900997	0.489801	-0.0974091	0.150251	0.51747	0.874796	Sugar_Sweets	871	871	-0.0242716	0.577625	-0.130136	0.0614587	0.0345067	0.356569	Sugar_Sweets	166.704	42.2369	44.2961	264.748	0.0439381	-0.0903073	-2.05533	0.0398471	0.263985	NS	NS	NS
P1_AA-synthesis and starch degradation	Bread_Legumes	205	205	-0.0736819	0.691941	0.215723	0.118439	0.0700561	0.217326	Bread_Legumes	126	126	0.0277121	0.583927	0.155323	0.165256	0.349159	0.546841	Bread_Legumes	223	223	-0.116311	0.444079	0.00727918	0.165819	0.965026	0.96661	Bread_Legumes	871	871	0.0435099	0.579569	0.0283282	0.0609794	0.642368	0.789433	Bread_Legumes	71.2875	36.6174	36.369	268.926	0.0491949	0.0700601	1.42413	0.154407	0.265924	NS	NS	NS
P15_Methanogenesis	Wine_Alcohol	205	205	-0.27214	0.559289	-0.0717427	0.0390068	0.0675097	0.131852	Wine_Alcohol	126	126	-0.21131	0.583969	-0.0279209	0.120524	0.817195	0.892215	Wine_Alcohol	223	223	-0.0117566	0.664384	-0.0712934	0.0923438	0.440929	0.889056	Wine_Alcohol	871	871	0.0981863	0.783786	-0.012835	0.0410373	0.754536	0.965888	Wine_Alcohol	657.232	68.8418	117.269	593.802	0.0263785	-0.0452673	-1.71607	0.086149	0.267062	NS	NS	NS
P12_Ferment. pyruvate and glycerol	Pasta_Pizza	205	205	-0.126846	0.636288	0.228155	0.068535	0.00103923	0.00536934	Pasta_Pizza	126	126	-0.0709619	0.607965	0.0312338	0.084042	0.710813	0.928157	Pasta_Pizza	223	223	0.00315542	0.506156	-0.0176219	0.0709922	0.804196	0.923337	Pasta_Pizza	871	871	0.0399249	0.617093	0.0347276	0.0264231	0.189098	0.857822	Pasta_Pizza	212.9	141.582	198.417	1432.3	0.0224439	0.0499901	2.22733	0.025925	0.267891	NS	NS	NS
P31_Anhydromuropeptides recycling	Vegetables_Fruit_Tea	205	205	-0.11222	0.77642	0.000555328	0.071542	0.993814	0.993814	Vegetables_Fruit_Tea	126	126	-0.000156026	0.675955	0.210234	0.138319	0.131161	0.692696	Vegetables_Fruit_Tea	223	223	0.0418139	0.681131	-0.102295	0.100163	0.308257	0.992246	Vegetables_Fruit_Tea	871	871	0.0161285	0.690431	0.14334	0.0505515	0.0046817	0.145133	Vegetables_Fruit_Tea	195.379	52.2682	99.6744	391.321	0.0367945	0.0771589	2.09702	0.0359917	0.268073	NS	NS	NS
P23_L-glutamine synthesis	Vegetables_Fruit_Tea	205	205	-0.11222	0.77642	0.0107452	0.0973685	0.912238	0.975151	Vegetables_Fruit_Tea	126	126	-0.000156026	0.675955	0.230152	0.146923	0.119871	0.692696	Vegetables_Fruit_Tea	223	223	0.0418139	0.681131	0.0206079	0.0997248	0.836479	0.992246	Vegetables_Fruit_Tea	871	871	0.0161285	0.690431	0.0802016	0.0477536	0.0934184	0.26327	Vegetables_Fruit_Tea	105.478	46.3254	100.553	438.518	0.0380453	0.0709786	1.86563	0.0620925	0.268073	NS	NS	NS
P6_Ferment. glutamate and pyruvate	Vegetables_Fruit_Tea	205	205	-0.11222	0.77642	-0.142853	0.0819219	0.0827441	0.326719	Vegetables_Fruit_Tea	126	126	-0.000156026	0.675955	0.0837738	0.14357	0.560649	0.861231	Vegetables_Fruit_Tea	223	223	0.0418139	0.681131	0.140969	0.0891105	0.115117	0.992246	Vegetables_Fruit_Tea	871	871	0.0161285	0.690431	0.0843035	0.0392567	0.0320311	0.198593	Vegetables_Fruit_Tea	149.005	48.5144	125.934	648.893	0.0320693	0.0568061	1.77136	0.0765016	0.268073	NS	NS	NS
P14_Sucrose degradation, heme synthesis (aerobic)	Vegetables_Fruit_Tea	205	205	-0.11222	0.77642	-0.018626	0.0763789	0.807588	0.946042	Vegetables_Fruit_Tea	126	126	-0.000156026	0.675955	0.160242	0.126439	0.207484	0.692696	Vegetables_Fruit_Tea	223	223	0.0418139	0.681131	0.0323021	0.0772224	0.676142	0.992246	Vegetables_Fruit_Tea	871	871	0.0161285	0.690431	0.0689815	0.0379256	0.069278	0.26327	Vegetables_Fruit_Tea	171.417	62.5518	167.692	695.24	0.0301937	0.0548875	1.81785	0.0690878	0.268073	NS	NS	NS
P7_Colanic acid building blocks synthesis	Vegetables_Fruit_Tea	205	205	-0.11222	0.77642	0.0371022	0.0687398	0.589974	0.795183	Vegetables_Fruit_Tea	126	126	-0.000156026	0.675955	-0.0310448	0.131221	0.813383	0.928794	Vegetables_Fruit_Tea	223	223	0.0418139	0.681131	0.0779054	0.0740422	0.293889	0.992246	Vegetables_Fruit_Tea	871	871	0.0161285	0.690431	0.0580622	0.0399289	0.14627	0.327916	Vegetables_Fruit_Tea	211.633	58.0757	182.407	627.228	0.0304383	0.0525113	1.72517	0.084496	0.268073	NS	NS	NS
P4_Ferment. acetylene to acetate	Vegetables_Fruit_Tea	205	205	-0.11222	0.77642	0.0562922	0.0415695	0.177217	0.422595	Vegetables_Fruit_Tea	126	126	-0.000156026	0.675955	0.0271356	0.0634594	0.669704	0.861231	Vegetables_Fruit_Tea	223	223	0.0418139	0.681131	0.0305489	0.0421574	0.469457	0.992246	Vegetables_Fruit_Tea	871	871	0.0161285	0.690431	0.0200336	0.0197958	0.311816	0.498127	Vegetables_Fruit_Tea	578.696	248.318	562.669	2551.84	0.0159283	0.0273057	1.71429	0.0864752	0.268073	NS	NS	NS
P24_L-phenylalanine synthesis	Vegetables_Fruit_Tea	205	205	-0.11222	0.77642	-0.0665702	0.0835369	0.426461	0.711516	Vegetables_Fruit_Tea	126	126	-0.000156026	0.675955	-0.0163863	0.150893	0.913705	0.944161	Vegetables_Fruit_Tea	223	223	0.0418139	0.681131	0.102887	0.0943705	0.276813	0.992246	Vegetables_Fruit_Tea	871	871	0.0161285	0.690431	-0.130039	0.050089	0.00958696	0.148598	Vegetables_Fruit_Tea	143.299	43.9202	112.287	398.579	0.0378483	-0.0723942	-1.91275	0.0557802	0.268073	NS	NS	NS
P28_UTP and CTP degradation	Vegetables_Fruit_Tea	205	205	-0.11222	0.77642	0.0339217	0.105911	0.749089	0.928871	Vegetables_Fruit_Tea	126	126	-0.000156026	0.675955	-0.274722	0.136499	0.0463913	0.692696	Vegetables_Fruit_Tea	223	223	0.0418139	0.681131	-0.137274	0.0931707	0.142104	0.992246	Vegetables_Fruit_Tea	871	871	0.0161285	0.690431	-0.0637676	0.0446999	0.154064	0.327916	Vegetables_Fruit_Tea	89.1488	53.6715	115.197	500.481	0.0363097	-0.0783768	-2.15856	0.030884	0.268073	NS	NS	NS
P25_L-tyrosine synthesis	Vegetables_Fruit_Tea	205	205	-0.11222	0.77642	-0.18477	0.0899904	0.0413595	0.326719	Vegetables_Fruit_Tea	126	126	-0.000156026	0.675955	-0.0616799	0.156689	0.694541	0.861231	Vegetables_Fruit_Tea	223	223	0.0418139	0.681131	-0.00692615	0.100961	0.94537	0.992246	Vegetables_Fruit_Tea	871	871	0.0161285	0.690431	-0.0664515	0.0485271	0.171239	0.331776	Vegetables_Fruit_Tea	123.483	40.731	98.1045	424.65	0.0381532	-0.0789357	-2.06891	0.0385543	0.268073	NS	NS	NS
P29_DMK synthesis	Pastry_Sweets	205	205	-0.0467602	0.641192	-0.161867	0.0917025	0.0790762	0.589099	Pastry_Sweets	126	126	0.0864701	0.764689	-0.091357	0.120682	0.450531	0.698324	Pastry_Sweets	223	223	0.04413	0.575045	-0.00308317	0.09295	0.973569	0.993966	Pastry_Sweets	871	871	-0.0122277	0.629675	-0.0814159	0.0437656	0.0631861	0.795174	Pastry_Sweets	118.915	68.6613	115.745	522.077	0.0348071	-0.0828489	-2.38023	0.0173019	0.26818	NS	NS	NS
P23_L-glutamine synthesis	Pastry_Sweets	205	205	-0.0467602	0.641192	-0.215132	0.126734	0.0911641	0.589099	Pastry_Sweets	126	126	0.0864701	0.764689	-0.168512	0.17537	0.338538	0.698324	Pastry_Sweets	223	223	0.04413	0.575045	-0.216057	0.128668	0.0945558	0.458453	Pastry_Sweets	871	871	-0.0122277	0.629675	-0.0678716	0.0597501	0.256303	0.795174	Pastry_Sweets	62.2607	32.5154	60.4031	280.106	0.0479306	-0.117016	-2.44136	0.0146322	0.26818	NS	NS	NS
P4_Ferment. acetylene to acetate	Meat_Potatoes_Gravy	205	205	0.0092388	0.66643	-0.020935	0.0563796	0.710793	0.989803	Meat_Potatoes_Gravy	126	126	0.0317397	0.612627	-0.181271	0.0768755	0.0199916	0.148459	Meat_Potatoes_Gravy	223	223	-0.12186	0.546907	-0.0237602	0.0611889	0.69817	0.883152	Meat_Potatoes_Gravy	871	871	0.0247565	0.537179	-0.0281251	0.0292271	0.336172	0.578962	Meat_Potatoes_Gravy	314.598	169.209	267.088	1170.65	0.0228126	-0.0398271	-1.74584	0.0808387	0.278444	NS	NS	NS
P3_AA-synthesis	Meat_Potatoes_Gravy	205	205	0.0092388	0.66643	0.0256533	0.0943432	0.78597	0.989803	Meat_Potatoes_Gravy	126	126	0.0317397	0.612627	-0.254894	0.118522	0.0335125	0.173148	Meat_Potatoes_Gravy	223	223	-0.12186	0.546907	0.099795	0.107327	0.353496	0.723733	Meat_Potatoes_Gravy	871	871	0.0247565	0.537179	-0.102092	0.049333	0.0388005	0.271395	Meat_Potatoes_Gravy	112.351	71.1876	86.8126	410.889	0.0383133	-0.0712644	-1.86004	0.0628797	0.278444	NS	NS	NS
P16_Bifidobacterium shunt	Meat_Potatoes_Gravy	205	205	0.0092388	0.66643	-0.14598	0.129624	0.261445	0.989803	Meat_Potatoes_Gravy	126	126	0.0317397	0.612627	0.110725	0.18361	0.547617	0.678307	Meat_Potatoes_Gravy	223	223	-0.12186	0.546907	-0.048354	0.145935	0.740708	0.883152	Meat_Potatoes_Gravy	871	871	0.0247565	0.537179	-0.124018	0.070646	0.0795296	0.308177	Meat_Potatoes_Gravy	59.5156	29.6625	46.955	200.367	0.054514	-0.0966517	-1.77297	0.0762334	0.278444	NS	NS	NS
P30_Mannan degradation	Pasta_Pizza	205	205	-0.126846	0.636288	0.308871	0.15754	0.0513234	0.0922623	Pasta_Pizza	126	126	-0.0709619	0.607965	-0.0431126	0.194928	0.825335	0.933709	Pasta_Pizza	223	223	0.00315542	0.506156	-0.00479101	0.158329	0.975888	0.978564	Pasta_Pizza	871	871	0.0399249	0.617093	0.0906601	0.0503566	0.0721517	0.857822	Pasta_Pizza	40.2918	26.3179	39.8915	394.355	0.0446831	0.0935827	2.09436	0.0362276	0.280764	NS	NS	NS
P15_Methanogenesis	Pasta_Pizza	205	205	-0.126846	0.636288	-0.0907075	0.0333778	0.00721109	0.0223544	Pasta_Pizza	126	126	-0.0709619	0.607965	-0.120882	0.133122	0.365671	0.928157	Pasta_Pizza	223	223	0.00315542	0.506156	0.117511	0.145773	0.421055	0.734359	Pasta_Pizza	871	871	0.0399249	0.617093	0.0439615	0.0613526	0.473852	0.857822	Pasta_Pizza	897.602	56.4286	47.0596	265.665	0.0280966	-0.0560734	-1.99574	0.0459624	0.282107	NS	NS	NS
P9_Enterobactin-, LPS-, quinone-synthesis (E.coli)	Pasta_Pizza	205	205	-0.126846	0.636288	-0.411891	0.102368	8.13784e-05	0.000921862	Pasta_Pizza	126	126	-0.0709619	0.607965	0.027873	0.127715	0.82761	0.933709	Pasta_Pizza	223	223	0.00315542	0.506156	0.165376	0.125467	0.188864	0.734359	Pasta_Pizza	871	871	0.0399249	0.617093	-0.0505236	0.0474049	0.286817	0.857822	Pasta_Pizza	95.4276	61.3077	63.5249	444.993	0.038771	-0.0745192	-1.92204	0.0546013	0.282107	NS	NS	NS
P8_Creatinine degradation I	Sweetened_tea_yoghurtdrink	205	205	0.111425	1.12755	-0.0431321	0.0570077	0.450183	0.696408	Sweetened_tea_yoghurtdrink	126	126	0.0674218	0.540567	-0.281057	0.155011	0.0723086	0.323091	Sweetened_tea_yoghurtdrink	223	223	0.00250442	0.480442	0.191225	0.139758	0.172647	0.99476	Sweetened_tea_yoghurtdrink	871	871	-0.0373747	0.434722	-0.138064	0.0802548	0.085732	0.577794	Sweetened_tea_yoghurtdrink	307.704	41.6176	51.1972	155.259	0.0424179	-0.0658795	-1.55311	0.120398	0.287103	NS	NS	NS
P12_Ferment. pyruvate and glycerol	Sugar_Sweets	205	205	0.184389	1.11711	-0.0690226	0.0428502	0.108819	0.636875	Sugar_Sweets	126	126	0.0308263	0.62208	0.0730425	0.0725511	0.316069	0.928887	Sugar_Sweets	223	223	-0.0900997	0.489801	-0.0938922	0.0679789	0.168639	0.522781	Sugar_Sweets	871	871	-0.0242716	0.577625	-0.0341229	0.026097	0.191377	0.637924	Sugar_Sweets	544.621	189.982	216.398	1468.31	0.0203308	-0.03891	-1.91385	0.0556396	0.287471	NS	NS	NS
P24_L-phenylalanine synthesis	Dairy_Lean_beef	205	205	-0.201195	0.55624	0.185498	0.118318	0.11852	0.796221	Dairy_Lean_beef	126	126	-0.146976	0.56817	-0.199378	0.169937	0.243022	0.942544	Dairy_Lean_beef	223	223	0.0254258	0.537627	0.238894	0.123914	0.0551723	0.531381	Dairy_Lean_beef	871	871	0.0612162	0.608226	0.0662362	0.0588015	0.260293	0.733554	Dairy_Lean_beef	71.4325	34.6276	65.1266	289.216	0.0466048	0.0891862	1.91367	0.0556626	0.28759	NS	NS	NS
P21_Glycogen degradation	Pasta_Pizza	205	205	-0.126846	0.636288	0.115653	0.147123	0.432746	0.462591	Pasta_Pizza	126	126	-0.0709619	0.607965	0.0854819	0.213031	0.688939	0.928157	Pasta_Pizza	223	223	0.00315542	0.506156	-0.323638	0.142856	0.0244701	0.597031	Pasta_Pizza	871	871	0.0399249	0.617093	-0.0953378	0.0569779	0.0946412	0.857822	Pasta_Pizza	46.1995	22.035	49.0005	308.026	0.0484922	-0.0893528	-1.84262	0.0653844	0.289559	NS	NS	NS
P17_Polyamine synthesis	Eggs_Alcoholic_drinks	205	205	-0.104303	0.43925	-0.0493219	0.171416	0.773852	0.879842	Eggs_Alcoholic_drinks	126	126	-0.134042	0.302491	0.515138	0.317573	0.107404	0.55971	Eggs_Alcoholic_drinks	223	223	-0.0546888	0.448173	0.133363	0.140493	0.343548	0.70834	Eggs_Alcoholic_drinks	871	871	0.0583724	0.606478	0.0723877	0.0619176	0.242686	0.584061	Eggs_Alcoholic_drinks	34.0326	9.91549	50.6631	260.839	0.0530409	0.0817764	1.54176	0.123132	0.290594	NS	NS	NS
P10_FA and beta-oxidation	Eggs_Alcoholic_drinks	205	205	-0.104303	0.43925	0.096583	0.0799424	0.228428	0.545366	Eggs_Alcoholic_drinks	126	126	-0.134042	0.302491	0.152535	0.182253	0.404318	0.830735	Eggs_Alcoholic_drinks	223	223	-0.0546888	0.448173	-0.105716	0.0607624	0.0833143	0.70834	Eggs_Alcoholic_drinks	871	871	0.0583724	0.606478	-0.0368721	0.0243483	0.130303	0.464521	Eggs_Alcoholic_drinks	156.475	30.1057	270.85	1686.8	0.0215955	-0.0331699	-1.53596	0.124548	0.290594	NS	NS	NS
P15_Methanogenesis	Eggs_Alcoholic_drinks	205	205	-0.104303	0.43925	-0.0129071	0.0495283	0.794696	0.879842	Eggs_Alcoholic_drinks	126	126	-0.134042	0.302491	-0.0488507	0.251415	0.846267	0.922419	Eggs_Alcoholic_drinks	223	223	-0.0546888	0.448173	-0.19971	0.138138	0.149696	0.70834	Eggs_Alcoholic_drinks	871	871	0.0583724	0.606478	-0.0855448	0.0579408	0.140195	0.464521	Eggs_Alcoholic_drinks	407.655	15.8204	52.4052	297.873	0.03595	-0.0542573	-1.50925	0.131236	0.290594	NS	NS	NS
P5_Biotin and FA-synthesis (E. coli)	Eggs_Alcoholic_drinks	205	205	-0.104303	0.43925	-0.0905104	0.134288	0.501093	0.715499	Eggs_Alcoholic_drinks	126	126	-0.134042	0.302491	-0.0604582	0.28978	0.835087	0.922419	Eggs_Alcoholic_drinks	223	223	-0.0546888	0.448173	0.0321529	0.12964	0.804356	0.943039	Eggs_Alcoholic_drinks	871	871	0.0583724	0.606478	-0.0798583	0.0514635	0.121088	0.464521	Eggs_Alcoholic_drinks	55.4528	11.9087	59.5007	377.574	0.0445243	-0.0673591	-1.51286	0.130315	0.290594	NS	NS	NS
P24_L-phenylalanine synthesis	Pastry_Sweets	205	205	-0.0467602	0.641192	0.140194	0.109235	0.200841	0.81081	Pastry_Sweets	126	126	0.0864701	0.764689	0.188304	0.17816	0.292664	0.698324	Pastry_Sweets	223	223	0.04413	0.575045	0.0563663	0.122812	0.646718	0.984127	Pastry_Sweets	871	871	-0.0122277	0.629675	0.0861705	0.0627921	0.170321	0.795174	Pastry_Sweets	83.8057	31.5049	66.3011	253.624	0.0479334	0.0994257	2.07425	0.0380563	0.294936	NS	NS	NS
P8_Creatinine degradation I	Pastry_Sweets	205	205	-0.0467602	0.641192	-0.172884	0.103061	0.0950159	0.589099	Pastry_Sweets	126	126	0.0864701	0.764689	-0.118941	0.153852	0.440989	0.698324	Pastry_Sweets	223	223	0.04413	0.575045	-0.0322715	0.130811	0.805371	0.984127	Pastry_Sweets	871	871	-0.0122277	0.629675	-0.0889523	0.063199	0.15964	0.795174	Pastry_Sweets	94.1486	42.2468	58.4404	250.368	0.0473937	-0.102107	-2.15444	0.0312054	0.294936	NS	NS	NS
P10_FA and beta-oxidation	Bread_Legumes	205	205	-0.0736819	0.691941	-0.030782	0.0564016	0.585842	0.672633	Bread_Legumes	126	126	0.0277121	0.583927	0.0195973	0.0958823	0.838401	0.866348	Bread_Legumes	223	223	-0.116311	0.444079	0.0449784	0.0678336	0.507993	0.96661	Bread_Legumes	871	871	0.0435099	0.579569	0.0412627	0.0265965	0.121168	0.417355	Bread_Legumes	314.352	108.774	217.325	1413.68	0.0220641	0.0294832	1.33625	0.181466	0.296076	NS	NS	NS
P20_Terpenoid synthesis via mevalonate	Meat_Potatoes_Gravy	205	205	0.0092388	0.66643	0.144397	0.109168	0.18745	0.989803	Meat_Potatoes_Gravy	126	126	0.0317397	0.612627	0.310404	0.157836	0.0515346	0.199696	Meat_Potatoes_Gravy	223	223	-0.12186	0.546907	0.0371164	0.136422	0.785826	0.902244	Meat_Potatoes_Gravy	871	871	0.0247565	0.537179	0.0261064	0.0673954	0.698584	0.832927	Meat_Potatoes_Gravy	83.9092	40.141	53.7321	220.161	0.0501291	0.081213	1.62008	0.105215	0.296516	NS	NS	NS
P19_Biotin biosynthesis II (Bacillus subtilis)	Meat_Potatoes_Gravy	205	205	0.0092388	0.66643	-0.00633224	0.114051	0.955779	0.989803	Meat_Potatoes_Gravy	126	126	0.0317397	0.612627	-0.147814	0.164927	0.371918	0.606813	Meat_Potatoes_Gravy	223	223	-0.12186	0.546907	-0.195142	0.144982	0.179713	0.602171	Meat_Potatoes_Gravy	871	871	0.0247565	0.537179	-0.0858126	0.0747202	0.2511	0.48731	Meat_Potatoes_Gravy	76.8777	36.7637	47.5745	179.112	0.0542065	-0.0898394	-1.65735	0.0974479	0.296516	NS	NS	NS
P14_Sucrose degradation, heme synthesis (aerobic)	Eggs_Alcoholic_drinks	205	205	-0.104303	0.43925	-0.190744	0.137576	0.167159	0.545366	Eggs_Alcoholic_drinks	126	126	-0.134042	0.302491	-0.348564	0.284959	0.223647	0.673678	Eggs_Alcoholic_drinks	223	223	-0.0546888	0.448173	-0.0906785	0.115015	0.431321	0.742831	Eggs_Alcoholic_drinks	871	871	0.0583724	0.606478	-0.0317714	0.0468388	0.497754	0.90767	Eggs_Alcoholic_drinks	52.8338	12.315	75.5942	455.814	0.0409425	-0.059855	-1.46193	0.143761	0.297105	NS	NS	NS
P19_Biotin biosynthesis II (Bacillus subtilis)	Rolls_Spreads	205	205	0.00970005	1.07387	0.129321	0.119335	0.279818	0.726473	Rolls_Spreads	126	126	0.0143831	0.689611	0.341095	0.334467	0.309867	0.775689	Rolls_Spreads	223	223	-0.16152	0.433979	-0.0681344	0.339263	0.841019	0.94514	Rolls_Spreads	871	871	0.0374261	0.602796	0.279908	0.139495	0.0451054	0.699134	Rolls_Spreads	70.2205	8.9391	8.68814	51.3903	0.0847464	0.186175	2.19685	0.028031	0.30215	NS	NS	NS
P7_Colanic acid building blocks synthesis	Rolls_Spreads	205	205	0.00970005	1.07387	0.103738	0.0972154	0.28722	0.726473	Rolls_Spreads	126	126	0.0143831	0.689611	0.956418	0.318142	0.0032217	0.0998727	Rolls_Spreads	223	223	-0.16152	0.433979	0.234615	0.249572	0.348227	0.835311	Rolls_Spreads	871	871	0.0374261	0.602796	0.0935745	0.110109	0.395652	0.908916	Rolls_Spreads	105.811	9.88003	16.0549	82.4809	0.0683224	0.148959	2.18023	0.0292403	0.30215	NS	NS	NS
P23_L-glutamine synthesis	Spreads_sweet	205	205	-0.0555374	0.536875	-0.196699	0.14608	0.179668	0.767382	Spreads_sweet	126	126	0.0129582	0.465282	-0.202333	0.210848	0.339179	0.94189	Spreads_sweet	223	223	-0.0241369	0.470388	-0.0608389	0.151648	0.688678	0.965036	Spreads_sweet	871	871	0.0180257	0.519839	-0.0450569	0.0651396	0.489312	0.651653	Spreads_sweet	46.8616	22.4937	43.4839	235.673	0.0535662	-0.0775671	-1.44806	0.1476	0.305041	NS	NS	NS
P16_Bifidobacterium shunt	Spreads_sweet	205	205	-0.0555374	0.536875	-0.0738534	0.145012	0.611113	0.858992	Spreads_sweet	126	126	0.0129582	0.465282	-0.0810414	0.211658	0.70248	0.94189	Spreads_sweet	223	223	-0.0241369	0.470388	-0.0276492	0.153586	0.857302	0.968561	Spreads_sweet	871	871	0.0180257	0.519839	-0.0893696	0.0653512	0.171815	0.324813	Spreads_sweet	47.5544	22.3218	42.3932	234.149	0.0537278	-0.0791499	-1.47316	0.140707	0.305041	NS	NS	NS
P5_Biotin and FA-synthesis (E. coli)	Dairy_Cereals	205	205	-0.161259	0.558239	0.141361	0.107611	0.190483	0.721032	Dairy_Cereals	126	126	-0.0521211	0.621192	0.153388	0.130781	0.243173	0.797383	Dairy_Cereals	223	223	-0.0111794	0.671357	0.0753193	0.0913573	0.410591	0.846927	Dairy_Cereals	871	871	0.0462207	0.622802	0.0551674	0.0476663	0.247442	0.917007	Dairy_Cereals	86.3546	58.4671	119.816	440.127	0.0376685	0.0773031	2.0522	0.0401506	0.311168	NS	NS	NS
P15_Methanogenesis	Fish_Nuts	205	205	-0.135461	0.55016	-0.0648051	0.036889	0.0806404	0.312482	Fish_Nuts	126	126	0.0141888	0.575752	0.142708	0.123673	0.25083	0.596453	Fish_Nuts	223	223	0.0520077	0.656703	-0.0250277	0.0946905	0.791791	0.940283	Fish_Nuts	871	871	0.0168252	0.570004	-0.0198031	0.0575156	0.730698	0.888933	Fish_Nuts	734.863	65.3806	111.529	302.293	0.0286998	-0.0387707	-1.35091	0.176726	0.322264	NS	NS	NS
P7_Colanic acid building blocks synthesis	Cheese_Butter	205	205	-0.0931494	0.425837	-0.0616687	0.123272	0.617441	0.832203	Cheese_Butter	126	126	-0.00880917	0.675371	-0.18218	0.123536	0.142909	0.88394	Cheese_Butter	223	223	-0.0538434	0.563146	0.0489395	0.0897771	0.586229	0.932114	Cheese_Butter	871	871	0.0356952	0.679706	-0.0631931	0.0413264	0.1266	0.490573	Cheese_Butter	65.807	65.5258	124.071	585.525	0.0344842	-0.0558013	-1.61817	0.105626	0.327441	NS	NS	NS
P4_Ferment. acetylene to acetate	Pasta_Pizza	205	205	-0.126846	0.636288	0.141095	0.053141	0.00857037	0.0241529	Pasta_Pizza	126	126	-0.0709619	0.607965	0.0663366	0.0757576	0.382974	0.928157	Pasta_Pizza	223	223	0.00315542	0.506156	0.0198047	0.0664579	0.765987	0.923337	Pasta_Pizza	871	871	0.0399249	0.617093	0.0103942	0.025839	0.687587	0.857822	Pasta_Pizza	354.112	174.24	226.416	1497.78	0.0210699	0.0362141	1.71876	0.0856581	0.331925	NS	NS	NS
P6_Ferment. glutamate and pyruvate	Wine_Alcohol	205	205	-0.27214	0.559289	0.336975	0.112099	0.00298758	0.0312913	Wine_Alcohol	126	126	-0.21131	0.583969	0.156783	0.154612	0.312603	0.670977	Wine_Alcohol	223	223	-0.0117566	0.664384	0.00117373	0.0890197	0.989492	0.989492	Wine_Alcohol	871	871	0.0981863	0.783786	0.0210019	0.0343247	0.540792	0.838228	Wine_Alcohol	79.5785	41.8324	126.191	848.763	0.0302011	0.046835	1.55077	0.120956	0.340876	NS	NS	NS
P10_FA and beta-oxidation	Meat	205	205	0.0153272	0.592254	-0.197219	0.0577707	0.000776853	0.013927	Meat	126	126	0.00509592	0.600788	-0.0377836	0.0888105	0.67129	0.928545	Meat	223	223	-0.0138947	0.560121	-0.0990345	0.0500067	0.0489249	0.281057	Meat	871	871	-0.0016754	0.624155	-0.00295811	0.023552	0.900079	0.993652	Meat	299.63	126.786	399.893	1802.79	0.0195028	-0.0413903	-2.12228	0.0338143	0.349415	NS	NS	NS
P31_Anhydromuropeptides recycling	Meat	205	205	0.0153272	0.592254	-0.314636	0.0933257	0.000898514	0.013927	Meat	126	126	0.00509592	0.600788	-0.122478	0.150745	0.418122	0.928545	Meat	223	223	-0.0138947	0.560121	-0.0966821	0.123299	0.43382	0.707812	Meat	871	871	-0.0016754	0.624155	0.000141005	0.0598398	0.99812	0.99812	Meat	114.815	44.0062	65.7782	279.267	0.0445495	-0.0949356	-2.13102	0.0330878	0.349415	NS	NS	NS
P26_Thiamin synthesis	Sweetened_tea_yoghurtdrink	205	205	0.111425	1.12755	0.0406547	0.067975	0.550464	0.74193	Sweetened_tea_yoghurtdrink	126	126	0.0674218	0.540567	0.140958	0.188701	0.456532	0.673928	Sweetened_tea_yoghurtdrink	223	223	0.00250442	0.480442	-0.0142762	0.13342	0.914886	0.99476	Sweetened_tea_yoghurtdrink	871	871	-0.0373747	0.434722	0.107861	0.076162	0.157075	0.577794	Sweetened_tea_yoghurtdrink	216.422	28.0834	56.177	172.395	0.0459763	0.0645769	1.40457	0.16015	0.349419	NS	NS	NS
P18_Formaldehyde assimilation	Sweetened_tea_yoghurtdrink	205	205	0.111425	1.12755	-0.0554903	0.0663588	0.404036	0.696408	Sweetened_tea_yoghurtdrink	126	126	0.0674218	0.540567	-0.015477	0.165423	0.925615	0.954156	Sweetened_tea_yoghurtdrink	223	223	0.00250442	0.480442	0.0880747	0.12747	0.490338	0.99476	Sweetened_tea_yoghurtdrink	871	871	-0.0373747	0.434722	-0.107447	0.0660426	0.104114	0.577794	Sweetened_tea_yoghurtdrink	227.093	36.5432	61.544	229.272	0.0424686	-0.0584022	-1.37519	0.169074	0.349419	NS	NS	NS
P25_L-tyrosine synthesis	Bread_Legumes	205	205	-0.0736819	0.691941	-0.0987339	0.115516	0.393734	0.568101	Bread_Legumes	126	126	0.0277121	0.583927	-0.294262	0.18258	0.109657	0.46733	Bread_Legumes	223	223	-0.116311	0.444079	0.0541451	0.166661	0.745583	0.96661	Bread_Legumes	871	871	0.0435099	0.579569	-0.0389603	0.065064	0.549464	0.771332	Bread_Legumes	74.9404	29.9981	36.0025	236.221	0.0514916	-0.0622553	-1.20904	0.226648	0.351305	NS	NS	NS
P8_Creatinine degradation I	Porridge_ready_Fish_fried_Chocolatemilk	205	205	0.0773975	0.762121	-0.0815083	0.0800269	0.309672	0.623969	Porridge_ready_Fish_fried_Chocolatemilk	126	126	0.129518	0.829902	-0.0636185	0.102537	0.536144	0.975487	Porridge_ready_Fish_fried_Chocolatemilk	223	223	-0.0295003	0.594099	-0.0227218	0.114556	0.84296	0.901095	Porridge_ready_Fish_fried_Chocolatemilk	871	871	-0.0289628	0.569582	-0.0784966	0.0618148	0.204473	0.649805	Porridge_ready_Fish_fried_Chocolatemilk	156.145	95.1119	76.2016	261.707	0.0411985	-0.0696791	-1.6913	0.090779	0.351769	NS	NS	NS
P17_Polyamine synthesis	Wine_Alcohol	205	205	-0.27214	0.559289	0.0930617	0.131388	0.479589	0.565145	Wine_Alcohol	126	126	-0.21131	0.583969	0.0190554	0.153899	0.901667	0.931722	Wine_Alcohol	223	223	-0.0117566	0.664384	0.14043	0.0933057	0.133765	0.889056	Wine_Alcohol	871	871	0.0981863	0.783786	0.0346603	0.04382	0.429178	0.831533	Wine_Alcohol	57.9283	42.2209	114.864	520.781	0.0368656	0.0548743	1.48849	0.13662	0.352936	NS	NS	NS
P24_L-phenylalanine synthesis	Sugar_Sweets	205	205	0.184389	1.11711	0.0440508	0.0665294	0.508657	0.749186	Sugar_Sweets	126	126	0.0308263	0.62208	0.152317	0.155838	0.330335	0.928887	Sugar_Sweets	223	223	-0.0900997	0.489801	-0.0927749	0.142558	0.515872	0.874796	Sugar_Sweets	871	871	-0.0242716	0.577625	0.117415	0.0646539	0.0697079	0.432189	Sugar_Sweets	225.93	41.1766	49.2061	239.227	0.042427	0.0715486	1.68639	0.0917202	0.360844	NS	NS	NS
P9_Enterobactin-, LPS-, quinone-synthesis (E.coli)	Sugar_Sweets	205	205	0.184389	1.11711	0.101583	0.065043	0.119929	0.636875	Sugar_Sweets	126	126	0.0308263	0.62208	-0.0606617	0.110537	0.58417	0.928887	Sugar_Sweets	223	223	-0.0900997	0.489801	0.223862	0.120176	0.0638434	0.29667	Sugar_Sweets	871	871	-0.0242716	0.577625	0.0263198	0.0468416	0.574337	0.918668	Sugar_Sweets	236.374	81.8433	69.2415	455.761	0.0344373	0.0551966	1.60281	0.108976	0.360844	NS	NS	NS
P18_Formaldehyde assimilation	Sugar_Sweets	205	205	0.184389	1.11711	-0.0971701	0.0730569	0.185021	0.636875	Sugar_Sweets	126	126	0.0308263	0.62208	0.0292474	0.141926	0.837081	0.928887	Sugar_Sweets	223	223	-0.0900997	0.489801	-0.31976	0.136421	0.0199861	0.251414	Sugar_Sweets	871	871	-0.0242716	0.577625	-0.0164896	0.0536416	0.758611	0.918668	Sugar_Sweets	187.36	49.6453	53.7326	347.534	0.039582	-0.062146	-1.57006	0.116401	0.360844	NS	NS	NS
P27_dTTP synthesis	Sugar_Sweets	205	205	0.184389	1.11711	-0.080097	0.0815694	0.327317	0.714635	Sugar_Sweets	126	126	0.0308263	0.62208	-0.228854	0.155485	0.143673	0.928887	Sugar_Sweets	223	223	-0.0900997	0.489801	-0.0303972	0.146796	0.836148	0.957766	Sugar_Sweets	871	871	-0.0242716	0.577625	-0.052554	0.0615118	0.393136	0.918668	Sugar_Sweets	150.295	41.364	46.406	264.291	0.0446164	-0.0732641	-1.64209	0.100571	0.360844	NS	NS	NS
P9_Enterobactin-, LPS-, quinone-synthesis (E.coli)	Eggs_Alcoholic_drinks	205	205	-0.104303	0.43925	-0.178975	0.148229	0.228702	0.545366	Eggs_Alcoholic_drinks	126	126	-0.134042	0.302491	-0.437779	0.23712	0.0673229	0.521752	Eggs_Alcoholic_drinks	223	223	-0.0546888	0.448173	-0.0766597	0.119652	0.522399	0.852336	Eggs_Alcoholic_drinks	871	871	0.0583724	0.606478	-0.0236949	0.044834	0.597286	0.97452	Eggs_Alcoholic_drinks	45.5128	17.7853	69.8495	497.49	0.0398208	-0.0524458	-1.31705	0.187823	0.363907	NS	NS	NS
P23_L-glutamine synthesis	Fish_Nuts	205	205	-0.135461	0.55016	0.258482	0.135483	0.0578501	0.312482	Fish_Nuts	126	126	0.0141888	0.575752	0.111272	0.165037	0.501465	0.637735	Fish_Nuts	223	223	0.0520077	0.656703	-0.0467057	0.101408	0.645569	0.940283	Fish_Nuts	871	871	0.0168252	0.570004	0.0463394	0.0584522	0.428127	0.698523	Fish_Nuts	54.4789	36.7143	97.2415	292.684	0.0455904	0.0565103	1.23952	0.215153	0.364443	NS	NS	NS
P17_Polyamine synthesis	Fish_Nuts	205	205	-0.135461	0.55016	0.0908767	0.132871	0.494803	0.639121	Fish_Nuts	126	126	0.0141888	0.575752	0.122027	0.158377	0.44253	0.596453	Fish_Nuts	223	223	0.0520077	0.656703	-0.0573152	0.0959797	0.551023	0.940283	Fish_Nuts	871	871	0.0168252	0.570004	0.085205	0.0613703	0.16538	0.398971	Fish_Nuts	56.6424	39.867	108.553	265.512	0.0460984	0.0561303	1.21762	0.223369	0.364443	NS	NS	NS
P1_AA-synthesis and starch degradation	Fastfood	205	205	0.059247	0.613728	0.126477	0.173981	0.468109	0.991927	Fastfood	126	126	0.0181697	0.719587	0.137005	0.215947	0.527003	0.907617	Fastfood	223	223	-0.0641103	0.381483	0.651206	0.225205	0.00422261	0.0654505	Fastfood	871	871	8.79047e-06	0.532809	0.0376697	0.0864032	0.662963	0.880985	Fastfood	33.0368	21.444	19.7171	133.949	0.069313	0.120117	1.73297	0.0831016	0.368022	NS	NS	NS
P28_UTP and CTP degradation	Fastfood	205	205	0.059247	0.613728	-0.147231	0.196019	0.453476	0.991927	Fastfood	126	126	0.0181697	0.719587	0.379062	0.210205	0.0738503	0.52958	Fastfood	223	223	-0.0641103	0.381483	-0.0995119	0.213873	0.642194	0.829501	Fastfood	871	871	8.79047e-06	0.532809	-0.204334	0.084661	0.0160045	0.277958	Fastfood	26.0258	22.6316	21.8619	139.519	0.0690003	-0.123487	-1.78966	0.0735082	0.368022	NS	NS	NS
P10_FA and beta-oxidation	Fastfood	205	205	0.059247	0.613728	-0.123435	0.0818687	0.133222	0.991927	Fastfood	126	126	0.0181697	0.719587	-0.0864222	0.125152	0.491213	0.907617	Fastfood	223	223	-0.0641103	0.381483	-0.132115	0.0935078	0.159132	0.411092	Fastfood	871	871	8.79047e-06	0.532809	-0.0205562	0.0376169	0.584892	0.863412	Fastfood	149.198	63.8443	114.368	706.697	0.0310969	-0.0518036	-1.66588	0.0957382	0.370986	NS	NS	NS
P2_Aerobic respiration, ECA-, LPS-, heme-synthesis	Eggs_Alcoholic_drinks	205	205	-0.104303	0.43925	-0.144567	0.117689	0.220754	0.545366	Eggs_Alcoholic_drinks	126	126	-0.134042	0.302491	-0.267006	0.134155	0.0489125	0.505429	Eggs_Alcoholic_drinks	223	223	-0.0546888	0.448173	-0.0776614	0.0807929	0.337501	0.70834	Eggs_Alcoholic_drinks	871	871	0.0583724	0.606478	-0.0097129	0.0288211	0.736193	0.975509	Eggs_Alcoholic_drinks	72.1987	55.563	153.198	1203.87	0.0259514	-0.0329087	-1.26809	0.204767	0.373399	NS	NS	NS
P14_Sucrose degradation, heme synthesis (aerobic)	Fish_Nuts	205	205	-0.135461	0.55016	-0.0107795	0.107255	0.920046	0.920046	Fish_Nuts	126	126	0.0141888	0.575752	-0.196002	0.140669	0.166088	0.523788	Fish_Nuts	223	223	0.0520077	0.656703	-0.133482	0.0780643	0.0887149	0.634812	Fish_Nuts	871	871	0.0168252	0.570004	0.00115066	0.0464522	0.980243	0.980243	Fish_Nuts	86.9293	50.5359	164.095	463.434	0.0361552	-0.0421083	-1.16465	0.244159	0.378446	NS	NS	NS
P20_Terpenoid synthesis via mevalonate	Cheese_Butter	205	205	-0.0931494	0.425837	-0.309112	0.143921	0.03294	0.34038	Cheese_Butter	126	126	-0.00880917	0.675371	-0.0517761	0.122904	0.67431	0.88394	Cheese_Butter	223	223	-0.0538434	0.563146	-0.241352	0.113054	0.0338954	0.932114	Cheese_Butter	871	871	0.0356952	0.679706	-0.00104545	0.0473451	0.982388	0.995317	Cheese_Butter	48.2781	66.2015	78.2395	446.117	0.0395645	-0.0590146	-1.49161	0.135802	0.382716	NS	NS	NS
P29_DMK synthesis	Meat_Potatoes_Gravy	205	205	0.0092388	0.66643	0.0174979	0.0952008	0.854357	0.989803	Meat_Potatoes_Gravy	126	126	0.0317397	0.612627	0.0979441	0.125965	0.438365	0.617696	Meat_Potatoes_Gravy	223	223	-0.12186	0.546907	0.120182	0.103158	0.245287	0.602171	Meat_Potatoes_Gravy	871	871	0.0247565	0.537179	0.0451104	0.0516711	0.382889	0.593478	Meat_Potatoes_Gravy	110.336	63.0231	93.9705	374.546	0.0394707	0.0565419	1.4325	0.151999	0.392665	NS	NS	NS
P27_dTTP synthesis	Vegetables_Fruit_Tea	205	205	-0.11222	0.77642	0.159205	0.102098	0.120507	0.415078	Vegetables_Fruit_Tea	126	126	-0.000156026	0.675955	0.0464769	0.15125	0.759159	0.905151	Vegetables_Fruit_Tea	223	223	0.0418139	0.681131	0.123826	0.0969928	0.20309	0.992246	Vegetables_Fruit_Tea	871	871	0.0161285	0.690431	0.0187032	0.0477651	0.695475	0.82008	Vegetables_Fruit_Tea	95.9318	43.7128	106.297	438.307	0.038229	0.0565066	1.47811	0.139379	0.392795	NS	NS	NS
P4_Ferment. acetylene to acetate	Sweetened_tea_yoghurtdrink	205	205	0.111425	1.12755	-0.00795057	0.0301085	0.792004	0.846625	Sweetened_tea_yoghurtdrink	126	126	0.0674218	0.540567	-0.0860061	0.076335	0.26212	0.580409	Sweetened_tea_yoghurtdrink	223	223	0.00250442	0.480442	-0.0554192	0.0586948	0.346126	0.99476	Sweetened_tea_yoghurtdrink	871	871	-0.0373747	0.434722	-0.0210474	0.0314319	0.50328	0.809487	Sweetened_tea_yoghurtdrink	1103.12	171.614	290.269	1012.18	0.0196982	-0.0236384	-1.20003	0.230129	0.396333	NS	NS	NS
P6_Ferment. glutamate and pyruvate	Sweetened_tea_yoghurtdrink	205	205	0.111425	1.12755	-0.0654181	0.0593429	0.271631	0.696408	Sweetened_tea_yoghurtdrink	126	126	0.0674218	0.540567	-0.228378	0.172469	0.187965	0.580409	Sweetened_tea_yoghurtdrink	223	223	0.00250442	0.480442	-0.0344625	0.124827	0.782748	0.99476	Sweetened_tea_yoghurtdrink	871	871	-0.0373747	0.434722	-0.00946767	0.0625198	0.879668	0.90899	Sweetened_tea_yoghurtdrink	283.963	33.6183	64.1776	255.838	0.0396029	-0.0484442	-1.22325	0.221235	0.396333	NS	NS	NS
P30_Mannan degradation	Sweetened_tea_yoghurtdrink	205	205	0.111425	1.12755	-0.0990825	0.0882982	0.263157	0.696408	Sweetened_tea_yoghurtdrink	126	126	0.0674218	0.540567	0.0795138	0.196728	0.686799	0.887116	Sweetened_tea_yoghurtdrink	223	223	0.00250442	0.480442	0.0780986	0.140549	0.579011	0.99476	Sweetened_tea_yoghurtdrink	871	871	-0.0373747	0.434722	-0.0747495	0.0613848	0.223662	0.577794	Sweetened_tea_yoghurtdrink	128.261	25.8384	50.6224	265.386	0.0461212	-0.0564506	-1.22396	0.220967	0.396333	NS	NS	NS
P19_Biotin biosynthesis II (Bacillus subtilis)	Porridge_ready_Fish_fried_Chocolatemilk	205	205	0.0773975	0.762121	-0.117845	0.0851774	0.168056	0.516594	Porridge_ready_Fish_fried_Chocolatemilk	126	126	0.129518	0.829902	-0.0294326	0.105519	0.780778	0.975487	Porridge_ready_Fish_fried_Chocolatemilk	223	223	-0.0295003	0.594099	0.101293	0.114309	0.376527	0.648464	Porridge_ready_Fish_fried_Chocolatemilk	871	871	-0.0289628	0.569582	-0.100738	0.0619379	0.104223	0.461559	Porridge_ready_Fish_fried_Chocolatemilk	137.832	89.8125	76.5316	260.667	0.0420761	-0.0662008	-1.57336	0.115636	0.398302	NS	NS	NS
P30_Mannan degradation	Fastfood	205	205	0.059247	0.613728	-0.22729	0.227034	0.317982	0.991927	Fastfood	126	126	0.0181697	0.719587	-0.0105666	0.250085	0.966368	0.966368	Fastfood	223	223	-0.0641103	0.381483	-0.394637	0.229169	0.0864883	0.357636	Fastfood	871	871	8.79047e-06	0.532809	-0.064965	0.0733847	0.376258	0.777601	Fastfood	19.4007	15.9891	19.0409	185.69	0.0645334	-0.1006	-1.55888	0.119025	0.409974	NS	NS	NS
P16_Bifidobacterium shunt	Bread_Legumes	205	205	-0.0736819	0.691941	0.294971	0.120734	0.0154319	0.159462	Bread_Legumes	126	126	0.0277121	0.583927	-0.167071	0.174134	0.339267	0.546841	Bread_Legumes	223	223	-0.116311	0.444079	0.0185157	0.166725	0.911675	0.96661	Bread_Legumes	871	871	0.0435099	0.579569	0.0234546	0.0643301	0.715501	0.789433	Bread_Legumes	68.6025	32.9786	35.9749	241.641	0.0513532	0.0555376	1.08148	0.279482	0.412569	NS	NS	NS
P3_AA-synthesis	Sugar_Sweets	205	205	0.184389	1.11711	-0.0954467	0.0552038	0.0853622	0.636875	Sugar_Sweets	126	126	0.0308263	0.62208	0.0369867	0.101083	0.715081	0.928887	Sugar_Sweets	223	223	-0.0900997	0.489801	-0.203979	0.111325	0.0682802	0.29667	Sugar_Sweets	871	871	-0.0242716	0.577625	-0.00467779	0.0432327	0.913862	0.976887	Sugar_Sweets	328.142	97.8685	80.6884	535.028	0.030983	-0.0447927	-1.44572	0.148256	0.417811	NS	NS	NS
P25_L-tyrosine synthesis	Pasta_Pizza	205	205	-0.126846	0.636288	-0.303414	0.115772	0.0094498	0.024412	Pasta_Pizza	126	126	-0.0709619	0.607965	-0.129431	0.187257	0.490778	0.928157	Pasta_Pizza	223	223	0.00315542	0.506156	0.0925788	0.1582	0.559021	0.825222	Pasta_Pizza	871	871	0.0399249	0.617093	-0.0315939	0.0633553	0.618133	0.857822	Pasta_Pizza	74.6097	28.5184	39.9563	249.135	0.0504935	-0.0777646	-1.54009	0.123538	0.42552	NS	NS	NS
P14_Sucrose degradation, heme synthesis (aerobic)	Meat	205	205	0.0153272	0.592254	-0.0611525	0.102365	0.550921	0.724315	Meat	126	126	0.00509592	0.600788	0.263913	0.135655	0.0540569	0.418941	Meat	223	223	-0.0138947	0.560121	-0.0443883	0.0949563	0.64064	0.826675	Meat	871	871	-0.0016754	0.624155	0.0928061	0.0446609	0.0380023	0.589035	Meat	95.433	54.3409	110.905	501.354	0.0362254	0.0657598	1.8153	0.0694786	0.430767	NS	NS	NS
P6_Ferment. glutamate and pyruvate	Meat	205	205	0.0153272	0.592254	-0.204988	0.109754	0.0632736	0.225507	Meat	126	126	0.00509592	0.600788	0.084657	0.155438	0.587014	0.928545	Meat	223	223	-0.0138947	0.560121	-0.0762037	0.110094	0.489571	0.7227	Meat	871	871	-0.0016754	0.624155	-0.0618055	0.0463307	0.182553	0.670365	Meat	83.0152	41.3893	82.5036	465.866	0.0385536	-0.0722284	-1.87345	0.0610057	0.430767	NS	NS	NS
P21_Glycogen degradation	Spreads_sweet	205	205	-0.0555374	0.536875	0.0433819	0.171471	0.800531	0.858992	Spreads_sweet	126	126	0.0129582	0.465282	0.17763	0.253518	0.484871	0.94189	Spreads_sweet	223	223	-0.0241369	0.470388	0.0343139	0.140177	0.806851	0.965036	Spreads_sweet	871	871	0.0180257	0.519839	-0.105574	0.0594949	0.0763299	0.287855	Spreads_sweet	34.0108	15.559	50.8915	282.515	0.0510992	-0.0622515	-1.21825	0.22313	0.432314	NS	NS	NS
P9_Enterobactin-, LPS-, quinone-synthesis (E.coli)	Spreads_sweet	205	205	-0.0555374	0.536875	0.0511277	0.123842	0.680164	0.858992	Spreads_sweet	126	126	0.0129582	0.465282	0.0114165	0.152223	0.94034	0.94189	Spreads_sweet	223	223	-0.0241369	0.470388	0.00704477	0.122185	0.954075	0.968561	Spreads_sweet	871	871	0.0180257	0.519839	0.0589193	0.049501	0.234268	0.403462	Spreads_sweet	65.2025	43.1561	66.983	408.105	0.0413999	0.0485794	1.17342	0.240628	0.438792	NS	NS	NS
P8_Creatinine degradation I	Pasta_Pizza	205	205	-0.126846	0.636288	0.197203	0.101556	0.0535717	0.0922623	Pasta_Pizza	126	126	-0.0709619	0.607965	0.0773276	0.155448	0.619781	0.928157	Pasta_Pizza	223	223	0.00315542	0.506156	-0.129562	0.157758	0.412394	0.734359	Pasta_Pizza	871	871	0.0399249	0.617093	0.038635	0.0660028	0.558462	0.857822	Pasta_Pizza	96.9592	41.3839	40.1806	229.549	0.049503	0.0636737	1.28626	0.198353	0.440195	NS	NS	NS
P1_AA-synthesis and starch degradation	Pasta_Pizza	205	205	-0.126846	0.636288	0.411264	0.118327	0.000626143	0.00485261	Pasta_Pizza	126	126	-0.0709619	0.607965	-0.0901767	0.168433	0.593374	0.928157	Pasta_Pizza	223	223	0.00315542	0.506156	-0.193643	0.156938	0.218582	0.734359	Pasta_Pizza	871	871	0.0399249	0.617093	0.0317897	0.0593714	0.592484	0.857822	Pasta_Pizza	71.4223	35.2488	40.6016	283.691	0.0481703	0.0634648	1.31751	0.187669	0.440195	NS	NS	NS
P3_AA-synthesis	Pasta_Pizza	205	205	-0.126846	0.636288	0.299756	0.0879399	0.000790186	0.00489915	Pasta_Pizza	126	126	-0.0709619	0.607965	-0.0610435	0.116601	0.601574	0.928157	Pasta_Pizza	223	223	0.00315542	0.506156	-0.159753	0.116156	0.170447	0.734359	Pasta_Pizza	871	871	0.0399249	0.617093	0.0266099	0.0437643	0.543329	0.857822	Pasta_Pizza	129.309	73.5526	74.1169	522.107	0.0353756	0.045457	1.28498	0.198798	0.440195	NS	NS	NS
P2_Aerobic respiration, ECA-, LPS-, heme-synthesis	Pasta_Pizza	205	205	-0.126846	0.636288	-0.325305	0.0813224	8.92124e-05	0.000921862	Pasta_Pizza	126	126	-0.0709619	0.607965	-0.00939382	0.0719782	0.89639	0.933709	Pasta_Pizza	223	223	0.00315542	0.506156	0.158102	0.0844792	0.0626225	0.647099	Pasta_Pizza	871	871	0.0399249	0.617093	-0.0263362	0.0304777	0.387764	0.857822	Pasta_Pizza	151.21	193.018	140.12	1076.56	0.0253112	-0.0366464	-1.44784	0.147663	0.440195	NS	NS	NS
P28_UTP and CTP degradation	Pasta_Pizza	205	205	-0.126846	0.636288	0.207292	0.136386	0.130126	0.170249	Pasta_Pizza	126	126	-0.0709619	0.607965	-0.0201585	0.166071	0.903589	0.933709	Pasta_Pizza	223	223	0.00315542	0.506156	-0.201194	0.146199	0.170187	0.734359	Pasta_Pizza	871	871	0.0399249	0.617093	-0.0963786	0.0582803	0.0985498	0.857822	Pasta_Pizza	53.76	36.2588	46.7857	294.413	0.0481562	-0.0634831	-1.31828	0.187412	0.440195	NS	NS	NS
P11_Mixed acid fermentation	Porridge_ready_Fish_fried_Chocolatemilk	205	205	0.0773975	0.762121	0.0837444	0.104124	0.422198	0.68885	Porridge_ready_Fish_fried_Chocolatemilk	126	126	0.129518	0.829902	0.0289123	0.127159	0.820522	0.975487	Porridge_ready_Fish_fried_Chocolatemilk	223	223	-0.0295003	0.594099	0.0841046	0.110817	0.448707	0.708632	Porridge_ready_Fish_fried_Chocolatemilk	871	871	-0.0289628	0.569582	0.0511548	0.0541777	0.345329	0.76263	Porridge_ready_Fish_fried_Chocolatemilk	92.2351	61.8452	81.43	340.69	0.0416594	0.0586408	1.40762	0.159243	0.448775	NS	NS	NS
P27_dTTP synthesis	Porridge_ready_Fish_fried_Chocolatemilk	205	205	0.0773975	0.762121	-0.061558	0.104011	0.55463	0.781524	Porridge_ready_Fish_fried_Chocolatemilk	126	126	0.129518	0.829902	-0.050154	0.11942	0.675252	0.975487	Porridge_ready_Fish_fried_Chocolatemilk	223	223	-0.0295003	0.594099	-0.263405	0.109246	0.0167363	0.428588	Porridge_ready_Fish_fried_Chocolatemilk	871	871	-0.0289628	0.569582	-0.00557695	0.0583964	0.923938	0.964667	Porridge_ready_Fish_fried_Chocolatemilk	92.4357	70.1206	83.7898	293.244	0.0430495	-0.0609964	-1.41689	0.156516	0.448775	NS	NS	NS
P21_Glycogen degradation	Wine_Alcohol	205	205	-0.27214	0.559289	0.129644	0.157742	0.412133	0.532338	Wine_Alcohol	126	126	-0.21131	0.583969	-0.0494553	0.192331	0.797514	0.892215	Wine_Alcohol	223	223	-0.0117566	0.664384	0.0571267	0.0914669	0.532915	0.889056	Wine_Alcohol	871	871	0.0981863	0.783786	0.0326082	0.0381475	0.392903	0.831533	Wine_Alcohol	40.1886	27.0335	119.529	687.174	0.033827	0.0378855	1.11998	0.262722	0.44914	NS	NS	NS
P1_AA-synthesis and starch degradation	Wine_Alcohol	205	205	-0.27214	0.559289	0.306378	0.128412	0.0179802	0.0673133	Wine_Alcohol	126	126	-0.21131	0.583969	0.164583	0.151444	0.279323	0.670977	Wine_Alcohol	223	223	-0.0117566	0.664384	0.026377	0.0997366	0.791671	0.889056	Wine_Alcohol	871	871	0.0981863	0.783786	0.0050586	0.0397077	0.898657	0.965888	Wine_Alcohol	60.644	43.6008	100.529	634.234	0.0345237	0.0376825	1.0915	0.275054	0.44914	NS	NS	NS
P18_Formaldehyde assimilation	Wine_Alcohol	205	205	-0.27214	0.559289	0.232874	0.126932	0.0680529	0.131852	Wine_Alcohol	126	126	-0.21131	0.583969	0.0892928	0.147634	0.546437	0.744033	Wine_Alcohol	223	223	-0.0117566	0.664384	0.0903418	0.0907815	0.320768	0.889056	Wine_Alcohol	871	871	0.0981863	0.783786	0.00949602	0.0363202	0.793806	0.965888	Wine_Alcohol	62.0663	45.8804	121.34	758.06	0.0318248	0.0371816	1.16832	0.242677	0.44914	NS	NS	NS
P12_Ferment. pyruvate and glycerol	Wine_Alcohol	205	205	-0.27214	0.559289	0.186008	0.0740887	0.0128524	0.0673133	Wine_Alcohol	126	126	-0.21131	0.583969	0.140363	0.0747996	0.0630128	0.516421	Wine_Alcohol	223	223	-0.0117566	0.664384	0.0118445	0.0449657	0.792483	0.889056	Wine_Alcohol	871	871	0.0981863	0.783786	0.00143867	0.0176937	0.935214	0.965888	Wine_Alcohol	182.178	178.732	494.582	3194.22	0.015714	0.0171438	1.09099	0.275279	0.44914	NS	NS	NS
P10_FA and beta-oxidation	Wine_Alcohol	205	205	-0.27214	0.559289	-0.0476091	0.061464	0.439508	0.54499	Wine_Alcohol	126	126	-0.21131	0.583969	-0.0427527	0.0871514	0.624651	0.806841	Wine_Alcohol	223	223	-0.0117566	0.664384	-0.0158138	0.0407326	0.698225	0.889056	Wine_Alcohol	871	871	0.0981863	0.783786	-0.0153372	0.0172372	0.373839	0.831533	Wine_Alcohol	264.703	131.659	602.719	3365.63	0.0151364	-0.0181871	-1.20155	0.229538	0.44914	NS	NS	NS
P25_L-tyrosine synthesis	Wine_Alcohol	205	205	-0.27214	0.559289	-0.268946	0.124823	0.0323926	0.100417	Wine_Alcohol	126	126	-0.21131	0.583969	-0.117278	0.168991	0.48903	0.721901	Wine_Alcohol	223	223	-0.0117566	0.664384	-0.126659	0.0999138	0.20627	0.889056	Wine_Alcohol	871	871	0.0981863	0.783786	0.00181262	0.0423728	0.965888	0.965888	Wine_Alcohol	64.1821	35.0164	100.173	556.963	0.0363616	-0.0436928	-1.20162	0.229511	0.44914	NS	NS	NS
P19_Biotin biosynthesis II (Bacillus subtilis)	Wine_Alcohol	205	205	-0.27214	0.559289	-0.0727147	0.117147	0.535497	0.592871	Wine_Alcohol	126	126	-0.21131	0.583969	-0.243106	0.142615	0.0908502	0.563272	Wine_Alcohol	223	223	-0.0117566	0.664384	0.0461083	0.0999857	0.645154	0.889056	Wine_Alcohol	871	871	0.0981863	0.783786	-0.0396313	0.0442397	0.370592	0.831533	Wine_Alcohol	72.8687	49.1668	100.029	510.947	0.0369356	-0.044868	-1.21476	0.224456	0.44914	NS	NS	NS
P23_L-glutamine synthesis	Bread_Legumes	205	205	-0.0736819	0.691941	0.0875029	0.123759	0.480366	0.620473	Bread_Legumes	126	126	0.0277121	0.583927	0.32784	0.172109	0.0591948	0.367008	Bread_Legumes	223	223	-0.116311	0.444079	0.0176912	0.16467	0.914544	0.96661	Bread_Legumes	871	871	0.0435099	0.579569	0.00648258	0.0640748	0.919437	0.919437	Bread_Legumes	65.2901	33.7593	36.8785	243.571	0.0513328	0.0500979	0.975943	0.329093	0.463721	NS	NS	NS
P26_Thiamin synthesis	Fish_Nuts	205	205	-0.135461	0.55016	-0.0607432	0.132404	0.646899	0.742736	Fish_Nuts	126	126	0.0141888	0.575752	-0.389297	0.170729	0.024361	0.25173	Fish_Nuts	223	223	0.0520077	0.656703	0.0249683	0.0974184	0.797962	0.940283	Fish_Nuts	871	871	0.0168252	0.570004	-0.0265451	0.0586786	0.651107	0.841013	Fish_Nuts	57.0423	34.3072	105.37	290.43	0.0453074	-0.0449537	-0.992195	0.321102	0.474008	NS	NS	NS
P17_Polyamine synthesis	Meat	205	205	0.0153272	0.592254	-0.302603	0.125249	0.0165944	0.139448	Meat	126	126	0.00509592	0.600788	0.234686	0.152767	0.127115	0.78811	Meat	223	223	-0.0138947	0.560121	-0.0451336	0.116083	0.697801	0.831994	Meat	871	871	-0.0016754	0.624155	-0.0831534	0.0591492	0.160135	0.670365	Meat	63.7462	42.8488	74.2102	285.826	0.0462927	-0.0779	-1.68277	0.0924199	0.477503	NS	NS	NS
P26_Thiamin synthesis	Meat_Potatoes_Gravy	205	205	0.0092388	0.66643	-0.0868096	0.127274	0.495989	0.989803	Meat_Potatoes_Gravy	126	126	0.0317397	0.612627	-0.150845	0.193329	0.436781	0.617696	Meat_Potatoes_Gravy	223	223	-0.12186	0.546907	0.152066	0.138067	0.271948	0.602171	Meat_Potatoes_Gravy	871	871	0.0247565	0.537179	-0.110688	0.0706413	0.117502	0.404729	Meat_Potatoes_Gravy	61.7334	26.7549	52.4587	200.393	0.0541261	-0.0691361	-1.27732	0.201491	0.480477	NS	NS	NS
P2_Aerobic respiration, ECA-, LPS-, heme-synthesis	Spreads_sweet	205	205	-0.0555374	0.536875	0.0272544	0.0983621	0.782004	0.858992	Spreads_sweet	126	126	0.0129582	0.465282	0.0172769	0.0864034	0.841865	0.94189	Spreads_sweet	223	223	-0.0241369	0.470388	0.0500276	0.0825317	0.545041	0.965036	Spreads_sweet	871	871	0.0180257	0.519839	0.0279565	0.03183	0.380021	0.535484	Spreads_sweet	103.358	133.949	146.811	987.024	0.0270059	0.0292235	1.08211	0.279202	0.480848	NS	NS	NS
P19_Biotin biosynthesis II (Bacillus subtilis)	Vegetables_Fruit_Tea	205	205	-0.11222	0.77642	0.0314827	0.08442	0.709598	0.916564	Vegetables_Fruit_Tea	126	126	-0.000156026	0.675955	-0.148129	0.132956	0.267453	0.692696	Vegetables_Fruit_Tea	223	223	0.0418139	0.681131	-0.00425073	0.100712	0.966373	0.992246	Vegetables_Fruit_Tea	871	871	0.0161285	0.690431	0.092681	0.0506456	0.0675953	0.26327	Vegetables_Fruit_Tea	140.317	56.5697	98.5911	389.867	0.0381984	0.0463301	1.21288	0.225176	0.498339	NS	NS	NS
P30_Mannan degradation	Vegetables_Fruit_Tea	205	205	-0.11222	0.77642	0.170752	0.122238	0.164003	0.422595	Vegetables_Fruit_Tea	126	126	-0.000156026	0.675955	0.0693545	0.162799	0.670862	0.861231	Vegetables_Fruit_Tea	223	223	0.0418139	0.681131	0.0976009	0.100748	0.33374	0.992246	Vegetables_Fruit_Tea	871	871	0.0161285	0.690431	0.0207836	0.0386728	0.591114	0.808649	Vegetables_Fruit_Tea	66.9253	37.7308	98.5215	668.636	0.0338679	0.0430791	1.27197	0.203383	0.498339	NS	NS	NS
P5_Biotin and FA-synthesis (E. coli)	Vegetables_Fruit_Tea	205	205	-0.11222	0.77642	-0.133895	0.0736828	0.0706925	0.326719	Vegetables_Fruit_Tea	126	126	-0.000156026	0.675955	0.0792349	0.128456	0.538518	0.861231	Vegetables_Fruit_Tea	223	223	0.0418139	0.681131	0.0386209	0.086925	0.657267	0.992246	Vegetables_Fruit_Tea	871	871	0.0161285	0.690431	0.0898331	0.041685	0.0314336	0.198593	Vegetables_Fruit_Tea	184.191	60.6026	132.346	575.493	0.0323994	0.0387864	1.19713	0.231255	0.498339	NS	NS	NS
P1_AA-synthesis and starch degradation	Vegetables_Fruit_Tea	205	205	-0.11222	0.77642	0.128691	0.0943045	0.173919	0.422595	Vegetables_Fruit_Tea	126	126	-0.000156026	0.675955	-0.137732	0.140355	0.328413	0.783138	Vegetables_Fruit_Tea	223	223	0.0418139	0.681131	-0.0194225	0.10042	0.846817	0.992246	Vegetables_Fruit_Tea	871	871	0.0161285	0.690431	-0.0777128	0.0454855	0.0878992	0.26327	Vegetables_Fruit_Tea	112.444	50.7628	99.1655	483.342	0.0366196	-0.0429241	-1.17216	0.241132	0.498339	NS	NS	NS
P3_AA-synthesis	Fastfood	205	205	0.059247	0.613728	0.0411331	0.12943	0.750968	0.991927	Fastfood	126	126	0.0181697	0.719587	0.0638396	0.149622	0.670382	0.945591	Fastfood	223	223	-0.0641103	0.381483	0.419848	0.167602	0.012979	0.134117	Fastfood	871	871	8.79047e-06	0.532809	0.00420305	0.0637009	0.947408	0.978988	Fastfood	59.6942	44.6693	35.5995	246.439	0.0508722	0.0550961	1.08303	0.278795	0.500509	NS	NS	NS
P4_Ferment. acetylene to acetate	Fastfood	205	205	0.059247	0.613728	-0.0255143	0.0773583	0.741883	0.991927	Fastfood	126	126	0.0181697	0.719587	0.00837994	0.0974819	0.931638	0.966368	Fastfood	223	223	-0.0641103	0.381483	-0.0527515	0.0979086	0.590592	0.829501	Fastfood	871	871	8.79047e-06	0.532809	-0.0481115	0.0377382	0.202697	0.697171	Fastfood	167.104	105.233	104.318	702.164	0.0304457	-0.0395495	-1.29902	0.193938	0.500509	NS	NS	NS
P15_Methanogenesis	Fastfood	205	205	0.059247	0.613728	0.00375658	0.0504039	0.940671	0.991927	Fastfood	126	126	0.0181697	0.719587	-0.293519	0.169235	0.0854161	0.52958	Fastfood	223	223	-0.0641103	0.381483	-0.234293	0.212154	0.270663	0.524409	Fastfood	871	871	8.79047e-06	0.532809	-0.0907644	0.0892557	0.309483	0.697171	Fastfood	393.615	34.9158	22.2177	125.525	0.0416568	-0.0440215	-1.05677	0.290618	0.500509	NS	NS	NS
P29_DMK synthesis	Fastfood	205	205	0.059247	0.613728	-0.0405411	0.130595	0.756555	0.991927	Fastfood	126	126	0.0181697	0.719587	-0.0837566	0.156364	0.593191	0.945591	Fastfood	223	223	-0.0641103	0.381483	0.00593914	0.163589	0.971072	0.971072	Fastfood	871	871	8.79047e-06	0.532809	-0.0744555	0.0665366	0.263444	0.697171	Fastfood	58.634	40.9002	37.3675	225.88	0.0525022	-0.0617419	-1.17599	0.2396	0.500509	NS	NS	NS
P5_Biotin and FA-synthesis (E. coli)	Fastfood	205	205	0.059247	0.613728	0.117753	0.137404	0.392483	0.991927	Fastfood	126	126	0.0181697	0.719587	-0.181838	0.196795	0.357342	0.852124	Fastfood	223	223	-0.0641103	0.381483	-0.298861	0.197696	0.13206	0.37217	Fastfood	871	871	8.79047e-06	0.532809	-0.0797393	0.0792891	0.314852	0.697171	Fastfood	52.9667	25.821	25.586	159.065	0.0616113	-0.0713207	-1.15759	0.247031	0.500509	NS	NS	NS
P18_Formaldehyde assimilation	Fastfood	205	205	0.059247	0.613728	-0.00317784	0.170813	0.985175	0.991927	Fastfood	126	126	0.0181697	0.719587	-0.217563	0.209215	0.300477	0.776232	Fastfood	223	223	-0.0641103	0.381483	-0.135694	0.209136	0.517135	0.777859	Fastfood	871	871	8.79047e-06	0.532809	-0.0575339	0.0790176	0.46674	0.797918	Fastfood	34.2736	22.8461	22.8634	160.159	0.0645306	-0.072442	-1.1226	0.261607	0.500509	NS	NS	NS
P26_Thiamin synthesis	Fastfood	205	205	0.059247	0.613728	-0.00653892	0.174823	0.970201	0.991927	Fastfood	126	126	0.0181697	0.719587	-0.102283	0.240095	0.670864	0.945591	Fastfood	223	223	-0.0641103	0.381483	-0.267211	0.218123	0.221885	0.491317	Fastfood	871	871	8.79047e-06	0.532809	-0.0630245	0.0910941	0.48921	0.797918	Fastfood	32.7193	17.3474	21.0183	120.509	0.0722452	-0.0793325	-1.0981	0.272161	0.500509	NS	NS	NS
P6_Ferment. glutamate and pyruvate	Fastfood	205	205	0.059247	0.613728	0.295497	0.15151	0.0525389	0.991927	Fastfood	126	126	0.0181697	0.719587	-0.166433	0.220171	0.451175	0.907617	Fastfood	223	223	-0.0641103	0.381483	-0.12967	0.20462	0.526937	0.777859	Fastfood	871	871	8.79047e-06	0.532809	-0.156626	0.0745223	0.0358656	0.277958	Fastfood	43.5632	20.6292	23.8837	180.064	0.0610687	-0.0815256	-1.33498	0.181883	0.500509	NS	NS	NS
P19_Biotin biosynthesis II (Bacillus subtilis)	Fastfood	205	205	0.059247	0.613728	-0.0060009	0.156478	0.969447	0.991927	Fastfood	126	126	0.0181697	0.719587	0.137037	0.20476	0.504618	0.907617	Fastfood	223	223	-0.0641103	0.381483	0.0584783	0.230118	0.799641	0.918106	Fastfood	871	871	8.79047e-06	0.532809	-0.188839	0.0961032	0.049739	0.308382	Fastfood	40.8405	23.8512	18.8843	108.274	0.072197	-0.0850591	-1.17815	0.238736	0.500509	NS	NS	NS
P26_Thiamin synthesis	Porridge_ready_Fish_fried_Chocolatemilk	205	205	0.0773975	0.762121	-0.227395	0.0942511	0.0167439	0.301578	Porridge_ready_Fish_fried_Chocolatemilk	126	126	0.129518	0.829902	-0.0472564	0.123556	0.702791	0.975487	Porridge_ready_Fish_fried_Chocolatemilk	223	223	-0.0295003	0.594099	0.0566954	0.108837	0.602953	0.805783	Porridge_ready_Fish_fried_Chocolatemilk	871	871	-0.0289628	0.569582	-0.0222398	0.0586798	0.704779	0.964667	Porridge_ready_Fish_fried_Chocolatemilk	112.571	65.5043	84.4206	290.417	0.0425277	-0.0549204	-1.2914	0.196564	0.507789	NS	NS	NS
P6_Ferment. glutamate and pyruvate	Cheese_Butter	205	205	-0.0931494	0.425837	0.291146	0.146568	0.0483591	0.368923	Cheese_Butter	126	126	-0.00880917	0.675371	0.286402	0.134017	0.0346226	0.357767	Cheese_Butter	223	223	-0.0538434	0.563146	0.0757085	0.108345	0.485443	0.932114	Cheese_Butter	871	871	0.0356952	0.679706	0.000239189	0.040744	0.995317	0.995317	Cheese_Butter	46.5499	55.6779	85.1887	602.382	0.0355829	0.0456986	1.28428	0.199043	0.514193	NS	NS	NS
P20_Terpenoid synthesis via mevalonate	Pastry_Sweets	205	205	-0.0467602	0.641192	0.00938707	0.10643	0.929807	0.979632	Pastry_Sweets	126	126	0.0864701	0.764689	0.281385	0.151451	0.0656311	0.698324	Pastry_Sweets	223	223	0.04413	0.575045	0.0313431	0.122542	0.798367	0.984127	Pastry_Sweets	871	871	-0.0122277	0.629675	0.0704681	0.0571277	0.217717	0.795174	Pastry_Sweets	88.2817	43.5968	66.5935	306.412	0.0445045	0.0728399	1.63669	0.101696	0.52474	NS	NS	NS
P12_Ferment. pyruvate and glycerol	Pastry_Sweets	205	205	-0.0467602	0.641192	-0.0274913	0.0713608	0.70047	0.944112	Pastry_Sweets	126	126	0.0864701	0.764689	-0.070506	0.0830994	0.397875	0.698324	Pastry_Sweets	223	223	0.04413	0.575045	-0.138978	0.0580291	0.017471	0.37038	Pastry_Sweets	871	871	-0.0122277	0.629675	-0.0108167	0.0253455	0.669654	0.928625	Pastry_Sweets	196.372	144.812	296.968	1556.67	0.0213452	-0.0335875	-1.57354	0.115593	0.52474	NS	NS	NS
P30_Mannan degradation	Pastry_Sweets	205	205	-0.0467602	0.641192	-0.128976	0.16077	0.423372	0.81081	Pastry_Sweets	126	126	0.0864701	0.764689	-0.00784185	0.193246	0.967698	0.977654	Pastry_Sweets	223	223	0.04413	0.575045	-0.0223943	0.13109	0.864515	0.984127	Pastry_Sweets	871	871	-0.0122277	0.629675	-0.070411	0.0482941	0.145213	0.795174	Pastry_Sweets	38.6891	26.778	58.1915	428.758	0.0425468	-0.0664216	-1.56114	0.11849	0.52474	NS	NS	NS
P1_AA-synthesis and starch degradation	Sugar_Sweets	205	205	0.184389	1.11711	-0.124712	0.0741141	0.0940083	0.636875	Sugar_Sweets	126	126	0.0308263	0.62208	0.00961705	0.146104	0.947628	0.947628	Sugar_Sweets	223	223	-0.0900997	0.489801	-0.309028	0.149983	0.0405506	0.251414	Sugar_Sweets	871	871	-0.0242716	0.577625	0.0198449	0.0586509	0.735178	0.918668	Sugar_Sweets	182.053	46.8464	44.4546	290.703	0.0421054	-0.0535805	-1.27253	0.203184	0.524892	NS	NS	NS
P15_Methanogenesis	Savoury_snacks	205	205	-0.0114351	0.501597	-0.0450869	0.04134	0.276875	0.898958	Savoury_snacks	126	126	0.0331572	0.582506	0.0188589	0.126835	0.882049	0.960509	Savoury_snacks	223	223	-0.010086	0.411775	-0.0552482	0.154474	0.720951	0.925301	Savoury_snacks	871	871	0.000932337	0.495994	-0.148977	0.0695452	0.0324592	0.340392	Savoury_snacks	585.138	62.1612	41.907	206.76	0.0334083	-0.0651001	-1.94862	0.0513405	0.530519	NS	NS	NS
P28_UTP and CTP degradation	Savoury_snacks	205	205	-0.0114351	0.501597	-0.0335544	0.166234	0.84024	0.93221	Savoury_snacks	126	126	0.0331572	0.582506	-0.026574	0.157693	0.86646	0.960509	Savoury_snacks	223	223	-0.010086	0.411775	-0.0162784	0.15541	0.916675	0.947231	Savoury_snacks	871	871	0.000932337	0.495994	-0.146093	0.0661363	0.0274383	0.340392	Savoury_snacks	36.1878	40.2139	41.404	228.623	0.0537271	-0.104948	-1.95336	0.0507768	0.530519	NS	NS	NS
P29_DMK synthesis	Vegetables_Fruit_Tea	205	205	-0.11222	0.77642	-0.00353961	0.0704967	0.960006	0.992006	Vegetables_Fruit_Tea	126	126	-0.000156026	0.675955	0.16565	0.10086	0.10313	0.692696	Vegetables_Fruit_Tea	223	223	0.0418139	0.681131	-0.0332662	0.0715495	0.642441	0.992246	Vegetables_Fruit_Tea	871	871	0.0161285	0.690431	0.037355	0.0350563	0.286914	0.494129	Vegetables_Fruit_Tea	201.216	98.3025	195.338	813.708	0.0276441	0.0301624	1.0911	0.27523	0.533258	NS	NS	NS
P21_Glycogen degradation	Eggs_Alcoholic_drinks	205	205	-0.104303	0.43925	0.226393	0.205306	0.271486	0.601147	Eggs_Alcoholic_drinks	126	126	-0.134042	0.302491	-0.279033	0.40048	0.487309	0.839254	Eggs_Alcoholic_drinks	223	223	-0.0546888	0.448173	0.00116655	0.137418	0.993235	0.993235	Eggs_Alcoholic_drinks	871	871	0.0583724	0.606478	0.0481096	0.0539234	0.372543	0.721802	Eggs_Alcoholic_drinks	23.7244	6.23503	52.9554	343.91	0.0484033	0.0474161	0.979605	0.327281	0.533985	NS	NS	NS
P18_Formaldehyde assimilation	Eggs_Alcoholic_drinks	205	205	-0.104303	0.43925	0.559349	0.162042	0.000679883	0.0210764	Eggs_Alcoholic_drinks	126	126	-0.134042	0.302491	-0.150551	0.308109	0.625996	0.896758	Eggs_Alcoholic_drinks	223	223	-0.0546888	0.448173	0.132063	0.136282	0.333602	0.70834	Eggs_Alcoholic_drinks	871	871	0.0583724	0.606478	-0.0131573	0.0513424	0.797807	0.975509	Eggs_Alcoholic_drinks	38.0842	10.5339	53.842	379.357	0.0455574	0.0453195	0.994778	0.319844	0.533985	NS	NS	NS
P11_Mixed acid fermentation	Dairy_Lean_beef	205	205	-0.201195	0.55624	0.0157739	0.146415	0.914315	0.937169	Dairy_Lean_beef	126	126	-0.146976	0.56817	0.113882	0.182088	0.532882	0.942544	Dairy_Lean_beef	223	223	0.0254258	0.537627	0.088414	0.128741	0.492969	0.952536	Dairy_Lean_beef	871	871	0.0612162	0.608226	0.0685583	0.0518376	0.186332	0.641809	Dairy_Lean_beef	46.6476	30.1605	60.3345	372.143	0.0443118	0.0687599	1.55173	0.120727	0.534648	NS	NS	NS
P7_Colanic acid building blocks synthesis	Fastfood	205	205	0.059247	0.613728	-0.0184294	0.127456	0.885178	0.991927	Fastfood	126	126	0.0181697	0.719587	0.0408189	0.201438	0.839762	0.964171	Fastfood	223	223	-0.0641103	0.381483	-0.363837	0.167828	0.0312526	0.241741	Fastfood	871	871	8.79047e-06	0.532809	-0.0216348	0.0758789	0.775619	0.961767	Fastfood	61.5569	24.6444	35.5037	173.683	0.058184	-0.0568867	-0.977704	0.328221	0.535518	NS	NS	NS
P30_Mannan degradation	Dairy_Lean_beef	205	205	-0.201195	0.55624	0.111728	0.174592	0.522948	0.936721	Dairy_Lean_beef	126	126	-0.146976	0.56817	0.0941214	0.184325	0.610551	0.942544	Dairy_Lean_beef	223	223	0.0254258	0.537627	-0.023752	0.133329	0.858775	0.952536	Dairy_Lean_beef	871	871	0.0612162	0.608226	0.063815	0.0452123	0.158471	0.641809	Dairy_Lean_beef	32.8058	29.4326	56.2533	489.2	0.0405656	0.0597634	1.47325	0.140683	0.535586	NS	NS	NS
P25_L-tyrosine synthesis	Dairy_Lean_beef	205	205	-0.201195	0.55624	-0.249602	0.128173	0.0528962	0.796221	Dairy_Lean_beef	126	126	-0.146976	0.56817	-0.0981143	0.177354	0.581148	0.942544	Dairy_Lean_beef	223	223	0.0254258	0.537627	0.00428839	0.133335	0.974372	0.974796	Dairy_Lean_beef	871	871	0.0612162	0.608226	-0.039869	0.0568342	0.483182	0.856151	Dairy_Lean_beef	60.8704	31.792	56.2483	309.585	0.0467016	-0.0663348	-1.4204	0.155493	0.535586	NS	NS	NS
P17_Polyamine synthesis	Pasta_Pizza	205	205	-0.126846	0.636288	0.25224	0.121369	0.0389658	0.0754962	Pasta_Pizza	126	126	-0.0709619	0.607965	0.193731	0.169622	0.255673	0.928157	Pasta_Pizza	223	223	0.00315542	0.506156	-0.0253315	0.148066	0.864318	0.956924	Pasta_Pizza	871	871	0.0399249	0.617093	-0.00335595	0.0655521	0.959182	0.959182	Pasta_Pizza	67.8864	34.7564	45.613	232.716	0.0512334	0.0575386	1.12307	0.261409	0.540244	NS	NS	NS
P19_Biotin biosynthesis II (Bacillus subtilis)	Fish_Nuts	205	205	-0.135461	0.55016	0.0375937	0.118543	0.751477	0.803303	Fish_Nuts	126	126	0.0141888	0.575752	0.13738	0.148359	0.356307	0.596453	Fish_Nuts	223	223	0.0520077	0.656703	0.129938	0.102072	0.204381	0.791977	Fish_Nuts	871	871	0.0168252	0.570004	-0.0107441	0.0620323	0.862534	0.954948	Fish_Nuts	71.1615	45.433	95.9808	259.875	0.0460068	0.0393612	0.855552	0.392245	0.546036	NS	NS	NS
P18_Formaldehyde assimilation	Fish_Nuts	205	205	-0.135461	0.55016	0.344394	0.127112	0.00732892	0.0916253	Fish_Nuts	126	126	0.0141888	0.575752	0.129164	0.152071	0.39737	0.596453	Fish_Nuts	223	223	0.0520077	0.656703	-0.0325674	0.0931615	0.726993	0.940283	Fish_Nuts	871	871	0.0168252	0.570004	-0.00883389	0.0509061	0.862273	0.954948	Fish_Nuts	61.8911	43.2421	115.22	385.887	0.0406142	0.0325596	0.801681	0.422738	0.546036	NS	NS	NS
P31_Anhydromuropeptides recycling	Fish_Nuts	205	205	-0.135461	0.55016	0.0702621	0.100327	0.484538	0.639121	Fish_Nuts	126	126	0.0141888	0.575752	-0.145856	0.155004	0.348604	0.596453	Fish_Nuts	223	223	0.0520077	0.656703	-0.0213586	0.102128	0.834539	0.940283	Fish_Nuts	871	871	0.0168252	0.570004	-0.0661758	0.0620443	0.286455	0.555006	Fish_Nuts	99.3498	41.6212	95.8755	259.774	0.0448733	-0.0369069	-0.822469	0.41081	0.546036	NS	NS	NS
P3_AA-synthesis	Porridge_ready_Fish_fried_Chocolatemilk	205	205	0.0773975	0.762121	0.0849086	0.0705532	0.230224	0.516594	Porridge_ready_Fish_fried_Chocolatemilk	126	126	0.129518	0.829902	0.0426646	0.0769462	0.580287	0.975487	Porridge_ready_Fish_fried_Chocolatemilk	223	223	-0.0295003	0.594099	0.100497	0.0843142	0.234587	0.630808	Porridge_ready_Fish_fried_Chocolatemilk	871	871	-0.0289628	0.569582	0.0026413	0.0410261	0.948682	0.964667	Porridge_ready_Fish_fried_Chocolatemilk	200.894	168.898	140.669	594.128	0.0300884	0.0361852	1.20263	0.229121	0.546365	NS	NS	NS
P31_Anhydromuropeptides recycling	Sugar_Sweets	205	205	0.184389	1.11711	0.0756095	0.0566957	0.183859	0.636875	Sugar_Sweets	126	126	0.0308263	0.62208	0.0576694	0.144691	0.690919	0.928887	Sugar_Sweets	223	223	-0.0900997	0.489801	0.0139124	0.151402	0.92687	0.957766	Sugar_Sweets	871	871	-0.0242716	0.577625	0.0140702	0.065422	0.829764	0.918668	Sugar_Sweets	311.1	47.7657	43.6249	233.643	0.0396484	0.0474288	1.19624	0.231605	0.552288	NS	NS	NS
P26_Thiamin synthesis	Pasta_Pizza	205	205	-0.126846	0.636288	-0.353361	0.119574	0.00350215	0.0135708	Pasta_Pizza	126	126	-0.0709619	0.607965	-0.122377	0.186986	0.514062	0.928157	Pasta_Pizza	223	223	0.00315542	0.506156	0.135013	0.149915	0.368802	0.734359	Pasta_Pizza	871	871	0.0399249	0.617093	0.00364228	0.0626146	0.953627	0.959182	Pasta_Pizza	69.94	28.601	44.4947	255.063	0.0501192	-0.0534485	-1.06643	0.28623	0.554572	NS	NS	NS
P27_dTTP synthesis	Wine_Alcohol	205	205	-0.27214	0.559289	0.0980193	0.14246	0.492223	0.565145	Wine_Alcohol	126	126	-0.21131	0.583969	-0.174457	0.162634	0.28556	0.670977	Wine_Alcohol	223	223	-0.0117566	0.664384	-0.101543	0.0964552	0.293629	0.889056	Wine_Alcohol	871	871	0.0981863	0.783786	0.0650085	0.0416073	0.118553	0.408349	Wine_Alcohol	49.2737	37.8075	107.485	577.644	0.0359859	0.0322081	0.89502	0.370776	0.558459	NS	NS	NS
P3_AA-synthesis	Wine_Alcohol	205	205	-0.27214	0.559289	0.225266	0.0956915	0.0195426	0.0673133	Wine_Alcohol	126	126	-0.21131	0.583969	0.111028	0.10486	0.291807	0.670977	Wine_Alcohol	223	223	-0.0117566	0.664384	0.00769258	0.0738913	0.917181	0.980435	Wine_Alcohol	871	871	0.0981863	0.783786	-0.00194812	0.0292721	0.946954	0.965888	Wine_Alcohol	109.208	90.9449	183.153	1167.06	0.025397	0.021823	0.859275	0.390189	0.558459	NS	NS	NS
P4_Ferment. acetylene to acetate	Wine_Alcohol	205	205	-0.27214	0.559289	0.0856098	0.057667	0.139244	0.20696	Wine_Alcohol	126	126	-0.21131	0.583969	-0.0143453	0.0685747	0.834653	0.892215	Wine_Alcohol	223	223	-0.0117566	0.664384	-0.0515014	0.041788	0.219123	0.889056	Wine_Alcohol	871	871	0.0981863	0.783786	-0.013716	0.017285	0.427691	0.831533	Wine_Alcohol	300.708	212.653	572.659	3347.06	0.0150192	-0.0118897	-0.791635	0.428574	0.558459	NS	NS	NS
P9_Enterobactin-, LPS-, quinone-synthesis (E.coli)	Wine_Alcohol	205	205	-0.27214	0.559289	-0.273658	0.11249	0.0158691	0.0673133	Wine_Alcohol	126	126	-0.21131	0.583969	-0.126186	0.114705	0.273496	0.670977	Wine_Alcohol	223	223	-0.0117566	0.664384	-0.00281522	0.0797878	0.971886	0.989492	Wine_Alcohol	871	871	0.0981863	0.783786	0.00440966	0.0317209	0.889471	0.965888	Wine_Alcohol	79.0267	76.0034	157.082	993.822	0.0276719	-0.0208867	-0.754798	0.45037	0.558459	NS	NS	NS
P7_Colanic acid building blocks synthesis	Wine_Alcohol	205	205	-0.27214	0.559289	0.0521501	0.0954449	0.58541	0.604923	Wine_Alcohol	126	126	-0.21131	0.583969	-0.222628	0.140285	0.115151	0.594945	Wine_Alcohol	223	223	-0.0117566	0.664384	-0.0491203	0.0736559	0.505551	0.889056	Wine_Alcohol	871	871	0.0981863	0.783786	-0.0140134	0.0348666	0.687846	0.965888	Wine_Alcohol	109.773	50.8134	184.326	822.585	0.0292666	-0.0224148	-0.765883	0.443746	0.558459	NS	NS	NS
P5_Biotin and FA-synthesis (E. coli)	Wine_Alcohol	205	205	-0.27214	0.559289	-0.302865	0.100896	0.00302819	0.0312913	Wine_Alcohol	126	126	-0.21131	0.583969	-0.0507543	0.138873	0.715402	0.887098	Wine_Alcohol	223	223	-0.0117566	0.664384	0.0215699	0.0863669	0.803019	0.889056	Wine_Alcohol	871	871	0.0981863	0.783786	0.00687663	0.0364558	0.850428	0.965888	Wine_Alcohol	98.2309	51.8521	134.062	752.432	0.0310598	-0.0234585	-0.755268	0.450088	0.558459	NS	NS	NS
P16_Bifidobacterium shunt	Dairy_Cereals	205	205	-0.161259	0.558239	-0.0257837	0.14006	0.85413	0.856475	Dairy_Cereals	126	126	-0.0521211	0.621192	-0.287339	0.149539	0.0570404	0.442063	Dairy_Cereals	223	223	-0.0111794	0.671357	-0.121914	0.105923	0.251014	0.846927	Dairy_Cereals	871	871	0.0462207	0.622802	-0.040649	0.0547946	0.458383	0.957321	Dairy_Cereals	50.9768	44.719	89.1283	333.062	0.0439423	-0.074473	-1.69479	0.0901155	0.558716	NS	NS	NS
P14_Sucrose degradation, heme synthesis (aerobic)	Pasta_Pizza	205	205	-0.126846	0.636288	-0.311492	0.0964185	0.00144534	0.00640081	Pasta_Pizza	126	126	-0.0709619	0.607965	0.107346	0.152002	0.481423	0.928157	Pasta_Pizza	223	223	0.00315542	0.506156	0.0915421	0.120986	0.450091	0.734359	Pasta_Pizza	871	871	0.0399249	0.617093	-0.00725608	0.0495618	0.883636	0.959182	Pasta_Pizza	107.567	43.2813	68.317	407.105	0.0399594	-0.0408135	-1.02137	0.307078	0.559965	NS	NS	NS
P27_dTTP synthesis	Bread_Legumes	205	205	-0.0736819	0.691941	0.0577468	0.130657	0.658989	0.701411	Bread_Legumes	126	126	0.0277121	0.583927	-0.0558795	0.178022	0.754149	0.834951	Bread_Legumes	223	223	-0.116311	0.444079	0.206606	0.160134	0.198351	0.96661	Bread_Legumes	871	871	0.0435099	0.579569	0.0222553	0.0639875	0.72807	0.789433	Bread_Legumes	58.5781	31.5538	38.9971	244.236	0.0517527	0.0404754	0.782092	0.434161	0.560791	NS	NS	NS
P7_Colanic acid building blocks synthesis	Bread_Legumes	205	205	-0.0736819	0.691941	-0.0304373	0.0875152	0.728362	0.728362	Bread_Legumes	126	126	0.0277121	0.583927	0.157442	0.153816	0.308096	0.546841	Bread_Legumes	223	223	-0.116311	0.444079	0.0679289	0.122477	0.579723	0.96661	Bread_Legumes	871	871	0.0435099	0.579569	0.0348623	0.0535411	0.515134	0.771332	Bread_Legumes	130.567	42.2664	66.6636	348.839	0.0412275	0.0329236	0.798583	0.424532	0.560791	NS	NS	NS
P22_Peptidoglycan synthesis IV (Enterococcus faecium)	Wine_Alcohol	205	205	-0.27214	0.559289	-0.0732251	0.128195	0.568508	0.604923	Wine_Alcohol	126	126	-0.21131	0.583969	-0.0379783	0.170014	0.823617	0.892215	Wine_Alcohol	223	223	-0.0117566	0.664384	-0.0801191	0.0963407	0.406536	0.889056	Wine_Alcohol	871	871	0.0981863	0.783786	-0.0090288	0.0431126	0.834167	0.965888	Wine_Alcohol	60.8496	34.5965	107.741	538.012	0.036731	-0.025984	-0.707414	0.479309	0.571484	NS	NS	NS
P8_Creatinine degradation I	Cheese_Butter	205	205	-0.0931494	0.425837	-0.0141548	0.141958	0.920674	0.951363	Cheese_Butter	126	126	-0.00880917	0.675371	0.308416	0.12024	0.0115495	0.179018	Cheese_Butter	223	223	-0.0538434	0.563146	0.167876	0.121409	0.168169	0.932114	Cheese_Butter	871	871	0.0356952	0.679706	-0.0168951	0.0523875	0.747149	0.96193	Cheese_Butter	49.6228	69.168	67.8422	364.371	0.0426013	0.046938	1.1018	0.270549	0.571739	NS	NS	NS
P18_Formaldehyde assimilation	Cheese_Butter	205	205	-0.0931494	0.425837	0.308734	0.163845	0.0609813	0.368923	Cheese_Butter	126	126	-0.00880917	0.675371	0.0374422	0.129978	0.773794	0.88394	Cheese_Butter	223	223	-0.0538434	0.563146	-0.00973715	0.110864	0.930093	0.961096	Cheese_Butter	871	871	0.0356952	0.679706	0.0335724	0.04309	0.436121	0.693311	Cheese_Butter	37.2507	59.1915	81.362	538.576	0.0373618	0.0432813	1.15844	0.246686	0.571739	NS	NS	NS
P17_Polyamine synthesis	Cheese_Butter	205	205	-0.0931494	0.425837	-0.0957377	0.169751	0.573397	0.807969	Cheese_Butter	126	126	-0.00880917	0.675371	0.111305	0.134962	0.411168	0.88394	Cheese_Butter	223	223	-0.0538434	0.563146	-0.113775	0.11402	0.31946	0.932114	Cheese_Butter	871	871	0.0356952	0.679706	-0.0519929	0.0519927	0.317588	0.569218	Cheese_Butter	34.7035	54.901	76.9202	369.927	0.0431752	-0.0469695	-1.08788	0.276648	0.571739	NS	NS	NS
P4_Ferment. acetylene to acetate	Porridge_ready_Fish_fried_Chocolatemilk	205	205	0.0773975	0.762121	0.0550654	0.0421422	0.192838	0.516594	Porridge_ready_Fish_fried_Chocolatemilk	126	126	0.129518	0.829902	-0.00751893	0.0501551	0.881085	0.975487	Porridge_ready_Fish_fried_Chocolatemilk	223	223	-0.0295003	0.594099	-0.0582234	0.053984	0.282	0.638055	Porridge_ready_Fish_fried_Chocolatemilk	871	871	-0.0289628	0.569582	-0.0400722	0.0242271	0.098486	0.461559	Porridge_ready_Fish_fried_Chocolatemilk	563.073	397.53	343.139	1703.72	0.0182348	-0.0200281	-1.09835	0.272053	0.572253	NS	NS	NS
P29_DMK synthesis	Porridge_ready_Fish_fried_Chocolatemilk	205	205	0.0773975	0.762121	-0.00162662	0.0714459	0.981859	0.981859	Porridge_ready_Fish_fried_Chocolatemilk	126	126	0.129518	0.829902	0.0054788	0.0805501	0.945885	0.986609	Porridge_ready_Fish_fried_Chocolatemilk	223	223	-0.0295003	0.594099	-0.0196296	0.0813852	0.809633	0.901095	Porridge_ready_Fish_fried_Chocolatemilk	871	871	-0.0289628	0.569582	-0.0594468	0.0428358	0.16556	0.641546	Porridge_ready_Fish_fried_Chocolatemilk	195.905	154.123	150.977	544.988	0.0309197	-0.0333039	-1.07711	0.281432	0.572253	NS	NS	NS
P25_L-tyrosine synthesis	Eggs_Alcoholic_drinks	205	205	-0.104303	0.43925	-0.0651632	0.164502	0.692438	0.879842	Eggs_Alcoholic_drinks	126	126	-0.134042	0.302491	-0.538363	0.349766	0.126386	0.55971	Eggs_Alcoholic_drinks	223	223	-0.0546888	0.448173	-0.17832	0.150041	0.235944	0.70834	Eggs_Alcoholic_drinks	871	871	0.0583724	0.606478	-0.00896143	0.0598975	0.881105	0.975509	Eggs_Alcoholic_drinks	36.9537	8.17419	44.4202	278.729	0.052109	-0.0467787	-0.89771	0.36934	0.572478	NS	NS	NS
P16_Bifidobacterium shunt	Pasta_Pizza	205	205	-0.126846	0.636288	0.262123	0.123283	0.0347194	0.0717535	Pasta_Pizza	126	126	-0.0709619	0.607965	0.0849292	0.177552	0.633283	0.928157	Pasta_Pizza	223	223	0.00315542	0.506156	0.130227	0.158105	0.411028	0.734359	Pasta_Pizza	871	871	0.0399249	0.617093	-0.0317565	0.0626322	0.612262	0.857822	Pasta_Pizza	65.7952	31.721	40.0046	254.921	0.0504792	0.0434582	0.860913	0.389286	0.581746	NS	NS	NS
P27_dTTP synthesis	Pasta_Pizza	205	205	-0.126846	0.636288	0.220225	0.132089	0.0970385	0.139823	Pasta_Pizza	126	126	-0.0709619	0.607965	-0.264501	0.179454	0.143122	0.928157	Pasta_Pizza	223	223	0.00315542	0.506156	-0.206659	0.152024	0.175436	0.734359	Pasta_Pizza	871	871	0.0399249	0.617093	0.0827467	0.0622439	0.184068	0.857822	Pasta_Pizza	57.3149	31.0522	43.2688	258.111	0.0506534	0.0431684	0.852231	0.394086	0.581746	NS	NS	NS
P5_Biotin and FA-synthesis (E. coli)	Pasta_Pizza	205	205	-0.126846	0.636288	-0.230216	0.0948028	0.0160558	0.0382868	Pasta_Pizza	126	126	-0.0709619	0.607965	0.0931137	0.153731	0.545864	0.928157	Pasta_Pizza	223	223	0.00315542	0.506156	0.0374943	0.13635	0.783589	0.923337	Pasta_Pizza	871	871	0.0399249	0.617093	-0.00734094	0.0545166	0.892916	0.959182	Pasta_Pizza	111.265	42.3132	53.7884	336.467	0.0428812	-0.0406894	-0.948887	0.342678	0.581746	NS	NS	NS
P24_L-phenylalanine synthesis	Pasta_Pizza	205	205	-0.126846	0.636288	-0.193131	0.107472	0.0738477	0.120488	Pasta_Pizza	126	126	-0.0709619	0.607965	0.0651933	0.180483	0.718573	0.928157	Pasta_Pizza	223	223	0.00315542	0.506156	-0.0702111	0.148316	0.636411	0.896761	Pasta_Pizza	871	871	0.0399249	0.617093	0.00376439	0.065587	0.954243	0.959182	Pasta_Pizza	86.5776	30.6992	45.4595	232.468	0.0503024	-0.043107	-0.856957	0.391469	0.581746	NS	NS	NS
P8_Creatinine degradation I	Sugar_Sweets	205	205	0.184389	1.11711	-0.0565047	0.0628928	0.370043	0.714635	Sugar_Sweets	126	126	0.0308263	0.62208	-0.175316	0.133867	0.192825	0.928887	Sugar_Sweets	223	223	-0.0900997	0.489801	-0.124769	0.151702	0.411718	0.874796	Sugar_Sweets	871	871	-0.0242716	0.577625	0.0146008	0.0651986	0.822854	0.918668	Sugar_Sweets	252.812	55.8023	43.4526	235.247	0.0412634	-0.0443627	-1.07511	0.282325	0.583473	NS	NS	NS
P11_Mixed acid fermentation	Sugar_Sweets	205	205	0.184389	1.11711	-0.0585027	0.0818115	0.475391	0.749186	Sugar_Sweets	126	126	0.0308263	0.62208	0.0638995	0.16686	0.702433	0.928887	Sugar_Sweets	223	223	-0.0900997	0.489801	-0.259982	0.146099	0.0765599	0.29667	Sugar_Sweets	871	871	-0.0242716	0.577625	-0.0218667	0.0571164	0.701929	0.918668	Sugar_Sweets	149.407	35.9165	46.8493	306.534	0.0430848	-0.0470173	-1.09127	0.275153	0.583473	NS	NS	NS
P13_Ferment. to butanoate	Pasta_Pizza	205	205	-0.126846	0.636288	-0.12128	0.0812902	0.137297	0.170249	Pasta_Pizza	126	126	-0.0709619	0.607965	0.067891	0.128424	0.598026	0.928157	Pasta_Pizza	223	223	0.00315542	0.506156	-0.0083051	0.111167	0.940515	0.978564	Pasta_Pizza	871	871	0.0399249	0.617093	-0.0159266	0.0443277	0.719464	0.857822	Pasta_Pizza	151.33	60.6331	80.9191	508.921	0.0353156	-0.0287032	-0.812763	0.416354	0.58668	NS	NS	NS
P23_L-glutamine synthesis	Pasta_Pizza	205	205	-0.126846	0.636288	0.18879	0.12537	0.133688	0.170249	Pasta_Pizza	126	126	-0.0709619	0.607965	0.0117489	0.177607	0.947368	0.947368	Pasta_Pizza	223	223	0.00315542	0.506156	-0.0936199	0.15627	0.549738	0.825222	Pasta_Pizza	871	871	0.0399249	0.617093	0.0269232	0.0623817	0.666148	0.857822	Pasta_Pizza	63.6227	31.7014	40.9493	256.972	0.0504276	0.0393359	0.780047	0.435363	0.586794	NS	NS	NS
P30_Mannan degradation	Porridge_ready_Fish_fried_Chocolatemilk	205	205	0.0773975	0.762121	-0.0887397	0.12433	0.476221	0.738142	Porridge_ready_Fish_fried_Chocolatemilk	126	126	0.129518	0.829902	0.15771	0.127872	0.219856	0.975487	Porridge_ready_Fish_fried_Chocolatemilk	223	223	-0.0295003	0.594099	-0.224871	0.113783	0.0493867	0.428588	Porridge_ready_Fish_fried_Chocolatemilk	871	871	-0.0289628	0.569582	-0.0241183	0.0472771	0.610078	0.903917	Porridge_ready_Fish_fried_Chocolatemilk	64.6921	61.1577	77.2401	447.402	0.0392084	-0.0372874	-0.951006	0.341601	0.588313	NS	NS	NS
P16_Bifidobacterium shunt	Porridge_ready_Fish_fried_Chocolatemilk	205	205	0.0773975	0.762121	-0.0308026	0.0975563	0.752529	0.937806	Porridge_ready_Fish_fried_Chocolatemilk	126	126	0.129518	0.829902	-0.184651	0.116079	0.114301	0.975487	Porridge_ready_Fish_fried_Chocolatemilk	223	223	-0.0295003	0.594099	0.0398672	0.114787	0.728692	0.901095	Porridge_ready_Fish_fried_Chocolatemilk	871	871	-0.0289628	0.569582	-0.0297575	0.058701	0.612331	0.903917	Porridge_ready_Fish_fried_Chocolatemilk	105.073	74.2147	75.8949	290.208	0.04282	-0.0413474	-0.965611	0.334239	0.588313	NS	NS	NS
P8_Creatinine degradation I	Dairy_Lean_beef	205	205	-0.201195	0.55624	0.170975	0.11199	0.128423	0.796221	Dairy_Lean_beef	126	126	-0.146976	0.56817	0.0372487	0.147234	0.800709	0.942544	Dairy_Lean_beef	223	223	0.0254258	0.537627	-0.068012	0.132984	0.609572	0.952536	Dairy_Lean_beef	871	871	0.0612162	0.608226	0.0558121	0.0591989	0.346052	0.817139	Dairy_Lean_beef	79.7341	46.1298	56.5455	285.347	0.0462371	0.0586434	1.26832	0.204683	0.592578	NS	NS	NS
P10_FA and beta-oxidation	Dairy_Lean_beef	205	205	-0.201195	0.55624	0.0750121	0.0628377	0.234006	0.936721	Dairy_Lean_beef	126	126	-0.146976	0.56817	0.0521267	0.0928928	0.575761	0.942544	Dairy_Lean_beef	223	223	0.0254258	0.537627	-0.0195649	0.0542198	0.718569	0.952536	Dairy_Lean_beef	871	871	0.0612162	0.608226	0.0242625	0.0231909	0.295761	0.764049	Dairy_Lean_beef	253.256	115.887	340.161	1859.36	0.0197309	0.0247193	1.25282	0.21027	0.592578	NS	NS	NS
P21_Glycogen degradation	Sweetened_tea_yoghurtdrink	205	205	0.111425	1.12755	-0.0326487	0.0820271	0.69104	0.793416	Sweetened_tea_yoghurtdrink	126	126	0.0674218	0.540567	-0.268349	0.213847	0.211966	0.580409	Sweetened_tea_yoghurtdrink	223	223	0.00250442	0.480442	-0.0550846	0.128342	0.668202	0.99476	Sweetened_tea_yoghurtdrink	871	871	-0.0373747	0.434722	-0.0238971	0.0694933	0.731023	0.871605	Sweetened_tea_yoghurtdrink	148.623	21.8672	60.7105	207.069	0.0477672	-0.0433818	-0.908194	0.363776	0.593529	NS	NS	NS
P29_DMK synthesis	Fish_Nuts	205	205	-0.135461	0.55016	0.0855257	0.0987974	0.387715	0.572341	Fish_Nuts	126	126	0.0141888	0.575752	0.112906	0.113154	0.320379	0.596453	Fish_Nuts	223	223	0.0520077	0.656703	0.00675224	0.0728206	0.926208	0.990085	Fish_Nuts	871	871	0.0168252	0.570004	0.0037122	0.0428838	0.931038	0.962073	Fish_Nuts	102.449	78.1023	188.578	543.767	0.033097	0.0228636	0.690806	0.489687	0.607212	NS	NS	NS
P16_Bifidobacterium shunt	Pastry_Sweets	205	205	-0.0467602	0.641192	-0.105227	0.126003	0.404656	0.81081	Pastry_Sweets	126	126	0.0864701	0.764689	-0.163497	0.17552	0.353464	0.698324	Pastry_Sweets	223	223	0.04413	0.575045	0.0249684	0.131107	0.84914	0.984127	Pastry_Sweets	871	871	-0.0122277	0.629675	-0.0681176	0.0599925	0.256508	0.795174	Pastry_Sweets	62.985	32.46	58.1768	277.847	0.0481421	-0.068159	-1.41579	0.156838	0.607746	NS	NS	NS
P31_Anhydromuropeptides recycling	Pasta_Pizza	205	205	-0.126846	0.636288	-0.152391	0.0920048	0.0992289	0.139823	Pasta_Pizza	126	126	-0.0709619	0.607965	0.166718	0.166416	0.318449	0.928157	Pasta_Pizza	223	223	0.00315542	0.506156	0.151263	0.157113	0.336738	0.734359	Pasta_Pizza	871	871	0.0399249	0.617093	-0.0393176	0.0662285	0.552891	0.857822	Pasta_Pizza	118.135	36.1083	40.511	227.987	0.0486365	-0.0350543	-0.72074	0.471069	0.608465	NS	NS	NS
P21_Glycogen degradation	Rolls_Spreads	205	205	0.00970005	1.07387	0.0530534	0.161236	0.74247	0.967716	Rolls_Spreads	126	126	0.0143831	0.689611	0.579034	0.44462	0.195304	0.756801	Rolls_Spreads	223	223	-0.16152	0.433979	0.0124763	0.310512	0.967987	0.967987	Rolls_Spreads	871	871	0.0374261	0.602796	0.157377	0.120442	0.191673	0.908916	Rolls_Spreads	38.4659	5.05851	10.3715	68.9363	0.0902286	0.129837	1.43898	0.150156	0.610652	NS	NS	NS
P26_Thiamin synthesis	Rolls_Spreads	205	205	0.00970005	1.07387	0.0645021	0.13364	0.62987	0.967716	Rolls_Spreads	126	126	0.0143831	0.689611	0.253989	0.392762	0.519077	0.775689	Rolls_Spreads	223	223	-0.16152	0.433979	0.0921181	0.322611	0.775503	0.94514	Rolls_Spreads	871	871	0.0374261	0.602796	0.149112	0.132176	0.259578	0.908916	Rolls_Spreads	55.9924	6.48249	9.60821	57.239	0.0879354	0.113501	1.29074	0.196795	0.610652	NS	NS	NS
P28_UTP and CTP degradation	Rolls_Spreads	205	205	0.00970005	1.07387	0.155236	0.149738	0.301127	0.726473	Rolls_Spreads	126	126	0.0143831	0.689611	-0.527153	0.345501	0.1297	0.588729	Rolls_Spreads	223	223	-0.16152	0.433979	0.0624787	0.315425	0.843169	0.94514	Rolls_Spreads	871	871	0.0374261	0.602796	0.164983	0.123184	0.180817	0.908916	Rolls_Spreads	44.5999	8.37726	10.051	65.9011	0.0880693	0.108648	1.23367	0.217326	0.610652	NS	NS	NS
P8_Creatinine degradation I	Rolls_Spreads	205	205	0.00970005	1.07387	-0.00837226	0.112202	0.940594	0.977096	Rolls_Spreads	126	126	0.0143831	0.689611	0.235064	0.326133	0.472459	0.775689	Rolls_Spreads	223	223	-0.16152	0.433979	0.699117	0.336112	0.0386987	0.835311	Rolls_Spreads	871	871	0.0374261	0.602796	0.132778	0.139385	0.34106	0.908916	Rolls_Spreads	79.4323	9.40179	8.85182	51.4713	0.08188	0.0976669	1.19281	0.232946	0.610652	NS	NS	NS
P25_L-tyrosine synthesis	Rolls_Spreads	205	205	0.00970005	1.07387	0.12331	0.128587	0.33874	0.726473	Rolls_Spreads	126	126	0.0143831	0.689611	-0.110494	0.393967	0.779604	0.895101	Rolls_Spreads	223	223	-0.16152	0.433979	0.300441	0.339525	0.377197	0.835311	Rolls_Spreads	871	871	0.0374261	0.602796	0.0561888	0.133844	0.674729	0.978707	Rolls_Spreads	60.4796	6.4429	8.67473	55.822	0.087231	0.0950292	1.0894	0.275979	0.610652	NS	NS	NS
P23_L-glutamine synthesis	Rolls_Spreads	205	205	0.00970005	1.07387	0.0329997	0.137981	0.811226	0.967716	Rolls_Spreads	126	126	0.0143831	0.689611	0.0709238	0.372996	0.849516	0.908103	Rolls_Spreads	223	223	-0.16152	0.433979	0.264636	0.33552	0.431128	0.835311	Rolls_Spreads	871	871	0.0374261	0.602796	0.126197	0.131726	0.338316	0.908916	Rolls_Spreads	52.5248	7.18771	8.88307	57.6314	0.0890069	0.0940113	1.05623	0.290865	0.610652	NS	NS	NS
P9_Enterobactin-, LPS-, quinone-synthesis (E.coli)	Rolls_Spreads	205	205	0.00970005	1.07387	0.0914264	0.116332	0.432856	0.789326	Rolls_Spreads	126	126	0.0143831	0.689611	0.249602	0.267336	0.352352	0.775689	Rolls_Spreads	223	223	-0.16152	0.433979	0.228727	0.270177	0.39816	0.835311	Rolls_Spreads	871	871	0.0374261	0.602796	0.0026753	0.100209	0.978707	0.978707	Rolls_Spreads	73.8924	13.9921	13.6995	99.5842	0.0705051	0.067844	0.962256	0.335921	0.610652	NS	NS	NS
P14_Sucrose degradation, heme synthesis (aerobic)	Rolls_Spreads	205	205	0.00970005	1.07387	0.117364	0.107944	0.278234	0.726473	Rolls_Spreads	126	126	0.0143831	0.689611	0.1794	0.319508	0.575511	0.775689	Rolls_Spreads	223	223	-0.16152	0.433979	0.337613	0.259252	0.194209	0.835311	Rolls_Spreads	871	871	0.0374261	0.602796	-0.0405981	0.104691	0.698268	0.978707	Rolls_Spreads	85.8221	9.79572	14.8784	91.2385	0.070406	0.0651788	0.925757	0.354572	0.610652	NS	NS	NS
P13_Ferment. to butanoate	Rolls_Spreads	205	205	0.00970005	1.07387	0.147146	0.0888603	0.0993118	0.726473	Rolls_Spreads	126	126	0.0143831	0.689611	-0.133401	0.26978	0.62187	0.803249	Rolls_Spreads	223	223	-0.16152	0.433979	0.0440966	0.238809	0.853674	0.94514	Rolls_Spreads	871	871	0.0374261	0.602796	-0.016038	0.0936475	0.86406	0.978707	Rolls_Spreads	126.644	13.7398	17.5347	114.027	0.06064	0.0579041	0.954884	0.339636	0.610652	NS	NS	NS
P15_Methanogenesis	Rolls_Spreads	205	205	0.00970005	1.07387	0.0508515	0.037679	0.178821	0.726473	Rolls_Spreads	126	126	0.0143831	0.689611	-0.163948	0.280169	0.559527	0.775689	Rolls_Spreads	223	223	-0.16152	0.433979	0.0728213	0.3136	0.816593	0.94514	Rolls_Spreads	871	871	0.0374261	0.602796	-0.0147808	0.129645	0.909256	0.978707	Rolls_Spreads	704.37	12.7397	10.1683	59.4964	0.0356513	0.0426942	1.19755	0.231092	0.610652	NS	NS	NS
P12_Ferment. pyruvate and glycerol	Rolls_Spreads	205	205	0.00970005	1.07387	-0.135453	0.0762221	0.0770903	0.726473	Rolls_Spreads	126	126	0.0143831	0.689611	0.113652	0.176318	0.520425	0.775689	Rolls_Spreads	223	223	-0.16152	0.433979	-0.130779	0.152279	0.391393	0.835311	Rolls_Spreads	871	871	0.0374261	0.602796	-0.0229365	0.0558746	0.681541	0.978707	Rolls_Spreads	172.123	32.1667	43.1241	320.311	0.0419692	-0.0575018	-1.37009	0.170657	0.610652	NS	NS	NS
P3_AA-synthesis	Rolls_Spreads	205	205	0.00970005	1.07387	-0.0907198	0.0988134	0.359682	0.726473	Rolls_Spreads	126	126	0.0143831	0.689611	-0.251878	0.244107	0.304225	0.775689	Rolls_Spreads	223	223	-0.16152	0.433979	-0.251406	0.250047	0.315808	0.835311	Rolls_Spreads	871	871	0.0374261	0.602796	0.0101612	0.0924711	0.912526	0.978707	Rolls_Spreads	102.416	16.7819	15.994	116.947	0.0629768	-0.0648485	-1.02972	0.303141	0.610652	NS	NS	NS
P24_L-phenylalanine synthesis	Rolls_Spreads	205	205	0.00970005	1.07387	-0.0143449	0.118578	0.903833	0.977096	Rolls_Spreads	126	126	0.0143831	0.689611	0.0780549	0.379225	0.837274	0.908103	Rolls_Spreads	223	223	-0.16152	0.433979	-0.535849	0.316717	0.0921026	0.835311	Rolls_Spreads	871	871	0.0374261	0.602796	-0.11131	0.138501	0.421804	0.908916	Rolls_Spreads	71.1205	6.95355	9.96916	52.1307	0.084463	-0.0829121	-0.981638	0.326278	0.610652	NS	NS	NS
P1_AA-synthesis and starch degradation	Rolls_Spreads	205	205	0.00970005	1.07387	-0.148309	0.132542	0.264511	0.726473	Rolls_Spreads	126	126	0.0143831	0.689611	-0.28806	0.353221	0.416388	0.775689	Rolls_Spreads	223	223	-0.16152	0.433979	-0.419841	0.337136	0.214358	0.835311	Rolls_Spreads	871	871	0.0374261	0.602796	0.00475343	0.125444	0.969782	0.978707	Rolls_Spreads	56.924	8.01506	8.79813	63.548	0.085347	-0.103019	-1.20706	0.227411	0.610652	NS	NS	NS
P20_Terpenoid synthesis via mevalonate	Rolls_Spreads	205	205	0.00970005	1.07387	0.0274546	0.115047	0.811632	0.967716	Rolls_Spreads	126	126	0.0143831	0.689611	-0.566545	0.321388	0.0804792	0.588729	Rolls_Spreads	223	223	-0.16152	0.433979	-0.25328	0.317527	0.425937	0.835311	Rolls_Spreads	871	871	0.0374261	0.602796	-0.187682	0.125866	0.136294	0.908916	Rolls_Spreads	75.5522	9.68144	9.91836	63.1221	0.0794868	-0.112272	-1.41246	0.157815	0.610652	NS	NS	NS
P26_Thiamin synthesis	Vegetables_Fruit_Tea	205	205	-0.11222	0.77642	-0.110753	0.0940226	0.240227	0.49647	Vegetables_Fruit_Tea	126	126	-0.000156026	0.675955	0.116934	0.156167	0.455457	0.861231	Vegetables_Fruit_Tea	223	223	0.0418139	0.681131	-0.0899148	0.0955834	0.347907	0.992246	Vegetables_Fruit_Tea	871	871	0.0161285	0.690431	0.0986313	0.0478877	0.0397319	0.205281	Vegetables_Fruit_Tea	113.119	41.0038	109.455	436.066	0.0378061	0.0363537	0.961584	0.336259	0.613178	NS	NS	NS
P21_Glycogen degradation	Sugar_Sweets	205	205	0.184389	1.11711	-0.0408281	0.0905381	0.652517	0.749186	Sugar_Sweets	126	126	0.0308263	0.62208	0.0456937	0.18465	0.804974	0.928887	Sugar_Sweets	223	223	-0.0900997	0.489801	0.0662395	0.138915	0.633961	0.893308	Sugar_Sweets	871	871	-0.0242716	0.577625	-0.0713034	0.0563129	0.205782	0.637924	Sugar_Sweets	121.994	29.3294	51.8202	315.344	0.0439168	-0.043768	-0.996611	0.318953	0.617972	NS	NS	NS
P15_Methanogenesis	Bread_Legumes	205	205	-0.0736819	0.691941	-0.0367988	0.0354046	0.300008	0.465013	Bread_Legumes	126	126	0.0277121	0.583927	-0.0687804	0.131233	0.60117	0.776512	Bread_Legumes	223	223	-0.116311	0.444079	0.025082	0.153705	0.870526	0.96661	Bread_Legumes	871	871	0.0435099	0.579569	0.0377513	0.0630169	0.549285	0.771332	Bread_Legumes	797.773	58.0647	42.3276	251.817	0.0294886	-0.0198113	-0.67183	0.501692	0.622098	NS	NS	NS
P11_Mixed acid fermentation	Vegetables_Fruit_Tea	205	205	-0.11222	0.77642	0.0188956	0.1029	0.854489	0.946042	Vegetables_Fruit_Tea	126	126	-0.000156026	0.675955	0.032801	0.161004	0.838911	0.928794	Vegetables_Fruit_Tea	223	223	0.0418139	0.681131	0.0113002	0.0975864	0.907921	0.992246	Vegetables_Fruit_Tea	871	871	0.0161285	0.690431	-0.057157	0.0442984	0.1973	0.359783	Vegetables_Fruit_Tea	94.4436	38.577	105.008	509.595	0.0365728	-0.0332926	-0.910311	0.362659	0.624579	NS	NS	NS
P22_Peptidoglycan synthesis IV (Enterococcus faecium)	Pastry_Sweets	205	205	-0.0467602	0.641192	0.117641	0.120844	0.331492	0.81081	Pastry_Sweets	126	126	0.0864701	0.764689	0.21359	0.185742	0.252461	0.698324	Pastry_Sweets	223	223	0.04413	0.575045	0.01633	0.126138	0.897112	0.984127	Pastry_Sweets	871	871	-0.0122277	0.629675	0.0374082	0.0617788	0.544994	0.928625	Pastry_Sweets	68.4775	28.9853	62.8509	262.012	0.0486605	0.0593723	1.22013	0.222414	0.630266	NS	NS	NS
P9_Enterobactin-, LPS-, quinone-synthesis (E.coli)	Pastry_Sweets	205	205	-0.0467602	0.641192	0.0744928	0.107643	0.489721	0.81081	Pastry_Sweets	126	126	0.0864701	0.764689	-0.0346583	0.126574	0.784695	0.886289	Pastry_Sweets	223	223	0.04413	0.575045	0.191369	0.103491	0.0657984	0.458453	Pastry_Sweets	871	871	-0.0122277	0.629675	0.0212421	0.0454582	0.640411	0.928625	Pastry_Sweets	86.3035	62.4184	93.3671	483.922	0.0371132	0.044645	1.20294	0.228999	0.630266	NS	NS	NS
P7_Colanic acid building blocks synthesis	Pastry_Sweets	205	205	-0.0467602	0.641192	-0.109496	0.0898451	0.224394	0.81081	Pastry_Sweets	126	126	0.0864701	0.764689	-0.0336698	0.155651	0.829109	0.886289	Pastry_Sweets	223	223	0.04413	0.575045	0.0999358	0.0961466	0.29977	0.844807	Pastry_Sweets	871	871	-0.0122277	0.629675	-0.067025	0.0499246	0.179778	0.795174	Pastry_Sweets	123.883	41.2756	108.176	401.209	0.038503	-0.0460085	-1.19493	0.232114	0.630266	NS	NS	NS
P21_Glycogen degradation	Pastry_Sweets	205	205	-0.0467602	0.641192	-0.155482	0.148774	0.297249	0.81081	Pastry_Sweets	126	126	0.0864701	0.764689	-0.366952	0.208621	0.0811364	0.698324	Pastry_Sweets	223	223	0.04413	0.575045	0.0691578	0.119586	0.563654	0.984127	Pastry_Sweets	871	871	-0.0122277	0.629675	-0.0439712	0.0546769	0.421503	0.928625	Pastry_Sweets	45.1801	22.9765	69.9263	334.497	0.0460005	-0.0535957	-1.16511	0.243974	0.630266	NS	NS	NS
P22_Peptidoglycan synthesis IV (Enterococcus faecium)	Fastfood	205	205	0.059247	0.613728	-0.00612615	0.171211	0.971493	0.991927	Fastfood	126	126	0.0181697	0.719587	0.028936	0.241681	0.904899	0.966368	Fastfood	223	223	-0.0641103	0.381483	-0.017408	0.222003	0.937572	0.968824	Fastfood	871	871	8.79047e-06	0.532809	0.0998535	0.093761	0.287183	0.697171	Fastfood	34.1143	17.1205	20.29	113.751	0.0734667	0.0609451	0.82956	0.406788	0.630521	NS	NS	NS
P12_Ferment. pyruvate and glycerol	Meat_Potatoes_Gravy	205	205	0.0092388	0.66643	-0.0223522	0.0736258	0.761758	0.989803	Meat_Potatoes_Gravy	126	126	0.0317397	0.612627	-0.147531	0.0859595	0.0886899	0.305487	Meat_Potatoes_Gravy	223	223	-0.12186	0.546907	0.0748049	0.065254	0.252907	0.602171	Meat_Potatoes_Gravy	871	871	0.0247565	0.537179	-0.0332439	0.0298782	0.266169	0.48731	Meat_Potatoes_Gravy	184.476	135.336	234.847	1120.19	0.024435	-0.0261286	-1.06931	0.28493	0.630917	NS	NS	NS
P13_Ferment. to butanoate	Sweetened_tea_yoghurtdrink	205	205	0.111425	1.12755	0.0772646	0.0451921	0.0888816	0.344416	Sweetened_tea_yoghurtdrink	126	126	0.0674218	0.540567	0.0257615	0.129801	0.843014	0.945663	Sweetened_tea_yoghurtdrink	223	223	0.00250442	0.480442	-0.235611	0.0974506	0.0164425	0.254858	Sweetened_tea_yoghurtdrink	871	871	-0.0373747	0.434722	0.0334421	0.0539728	0.535677	0.809487	Sweetened_tea_yoghurtdrink	489.638	59.3532	105.301	343.281	0.0316612	0.0260941	0.824164	0.409846	0.635262	NS	NS	NS
P13_Ferment. to butanoate	Sugar_Sweets	205	205	0.184389	1.11711	0.0359932	0.050187	0.474103	0.749186	Sugar_Sweets	126	126	0.0308263	0.62208	0.237537	0.109266	0.031674	0.879833	Sugar_Sweets	223	223	-0.0900997	0.489801	0.298872	0.104958	0.00482906	0.149701	Sugar_Sweets	871	871	-0.0242716	0.577625	-0.0629555	0.043731	0.150341	0.637924	Sugar_Sweets	397.024	83.7581	90.7753	522.903	0.0302273	0.0259456	0.858349	0.3907	0.637458	NS	NS	NS
P15_Methanogenesis	Sugar_Sweets	205	205	0.184389	1.11711	0.0246124	0.0267685	0.359075	0.714635	Sugar_Sweets	126	126	0.0308263	0.62208	0.13899	0.115037	0.229335	0.928887	Sugar_Sweets	223	223	-0.0900997	0.489801	0.110395	0.140187	0.431857	0.874796	Sugar_Sweets	871	871	-0.0242716	0.577625	-0.0501914	0.0605887	0.407675	0.918668	Sugar_Sweets	1395.57	75.5663	50.8844	272.406	0.0236068	0.0205059	0.868641	0.385043	0.637458	NS	NS	NS
P17_Polyamine synthesis	Sugar_Sweets	205	205	0.184389	1.11711	-0.067279	0.0752662	0.372465	0.714635	Sugar_Sweets	126	126	0.0308263	0.62208	-0.105477	0.147445	0.475774	0.928887	Sugar_Sweets	223	223	-0.0900997	0.489801	-0.0790587	0.142291	0.579049	0.874796	Sugar_Sweets	871	871	-0.0242716	0.577625	-0.000437518	0.0647425	0.99461	0.99461	Sugar_Sweets	176.523	45.998	49.3905	238.573	0.0442598	-0.0406225	-0.91782	0.358713	0.637458	NS	NS	NS
P26_Thiamin synthesis	Spreads_sweet	205	205	-0.0555374	0.536875	0.0601153	0.142127	0.672774	0.858992	Spreads_sweet	126	126	0.0129582	0.465282	-0.0933327	0.223063	0.676392	0.94189	Spreads_sweet	223	223	-0.0241369	0.470388	-0.0500614	0.145646	0.73139	0.965036	Spreads_sweet	871	871	0.0180257	0.519839	0.0739379	0.0653456	0.258162	0.421212	Spreads_sweet	49.5051	20.0977	47.1414	234.19	0.0533811	0.0457516	0.857075	0.391404	0.637879	NS	NS	NS
P30_Mannan degradation	Spreads_sweet	205	205	-0.0555374	0.536875	-0.179254	0.184683	0.332926	0.767382	Spreads_sweet	126	126	0.0129582	0.465282	-0.0432874	0.232306	0.852495	0.94189	Spreads_sweet	223	223	-0.0241369	0.470388	0.281921	0.152379	0.0656537	0.689722	Spreads_sweet	871	871	0.0180257	0.519839	0.0314647	0.0526792	0.550471	0.682584	Spreads_sweet	29.3187	18.5301	43.0678	360.347	0.0470744	0.0386078	0.820145	0.412133	0.637879	NS	NS	NS
P10_FA and beta-oxidation	Spreads_sweet	205	205	-0.0555374	0.536875	-0.0419713	0.0699276	0.549052	0.858992	Spreads_sweet	126	126	0.0129582	0.465282	-0.185618	0.114167	0.106651	0.897772	Spreads_sweet	223	223	-0.0241369	0.470388	0.0190631	0.0624166	0.760342	0.965036	Spreads_sweet	871	871	0.0180257	0.519839	0.0364644	0.0270575	0.178123	0.324813	Spreads_sweet	204.504	76.7219	256.685	1365.92	0.0229185	0.0167433	0.730559	0.465049	0.637879	NS	NS	NS
P12_Ferment. pyruvate and glycerol	Spreads_sweet	205	205	-0.0555374	0.536875	-0.075032	0.0854039	0.380707	0.767382	Spreads_sweet	126	126	0.0129582	0.465282	-0.128876	0.099516	0.197797	0.897772	Spreads_sweet	223	223	-0.0241369	0.470388	-0.0166309	0.0688613	0.809385	0.965036	Spreads_sweet	871	871	0.0180257	0.519839	-0.0025001	0.0276215	0.927901	0.927901	Spreads_sweet	137.102	100.975	210.887	1310.71	0.0238388	-0.0170966	-0.717177	0.473265	0.637879	NS	NS	NS
P6_Ferment. glutamate and pyruvate	Spreads_sweet	205	205	-0.0555374	0.536875	-0.171629	0.123804	0.167208	0.767382	Spreads_sweet	126	126	0.0129582	0.465282	-0.139355	0.204638	0.497194	0.94189	Spreads_sweet	223	223	-0.0241369	0.470388	0.041009	0.136295	0.763791	0.965036	Spreads_sweet	871	871	0.0180257	0.519839	-0.0120635	0.0536175	0.822038	0.849439	Spreads_sweet	65.2423	23.8797	53.8322	347.846	0.0451386	-0.0336469	-0.745414	0.456022	0.637879	NS	NS	NS
P31_Anhydromuropeptides recycling	Rolls_Spreads	205	205	0.00970005	1.07387	0.1295	0.100977	0.201168	0.726473	Rolls_Spreads	126	126	0.0143831	0.689611	-0.526027	0.347699	0.132939	0.588729	Rolls_Spreads	223	223	-0.16152	0.433979	0.243644	0.33785	0.471588	0.859954	Rolls_Spreads	871	871	0.0374261	0.602796	0.0106458	0.139936	0.939376	0.978707	Rolls_Spreads	98.0744	8.27168	8.76098	51.0674	0.0775743	0.0663625	0.85547	0.392291	0.640054	NS	NS	NS
P12_Ferment. pyruvate and glycerol	Porridge_ready_Fish_fried_Chocolatemilk	205	205	0.0773975	0.762121	0.100405	0.0544874	0.0668645	0.389822	Porridge_ready_Fish_fried_Chocolatemilk	126	126	0.129518	0.829902	0.0172261	0.0554777	0.756716	0.975487	Porridge_ready_Fish_fried_Chocolatemilk	223	223	-0.0295003	0.594099	0.0983632	0.0510481	0.0553017	0.428588	Porridge_ready_Fish_fried_Chocolatemilk	871	871	-0.0289628	0.569582	-0.0222687	0.0247763	0.369015	0.76263	Porridge_ready_Fish_fried_Chocolatemilk	336.828	324.91	383.743	1629.02	0.0193365	0.0152874	0.790598	0.429179	0.640245	NS	NS	NS
P2_Aerobic respiration, ECA-, LPS-, heme-synthesis	Porridge_ready_Fish_fried_Chocolatemilk	205	205	0.0773975	0.762121	-0.0808269	0.0659103	0.221529	0.516594	Porridge_ready_Fish_fried_Chocolatemilk	126	126	0.129518	0.829902	-0.055506	0.0513824	0.282271	0.975487	Porridge_ready_Fish_fried_Chocolatemilk	223	223	-0.0295003	0.594099	-0.0381357	0.061693	0.537123	0.792896	Porridge_ready_Fish_fried_Chocolatemilk	871	871	-0.0289628	0.569582	0.0102596	0.0285749	0.719652	0.964667	Porridge_ready_Fish_fried_Chocolatemilk	230.194	378.766	262.741	1224.7	0.0218405	-0.0176896	-0.809945	0.417972	0.640245	NS	NS	NS
P9_Enterobactin-, LPS-, quinone-synthesis (E.coli)	Porridge_ready_Fish_fried_Chocolatemilk	205	205	0.0773975	0.762121	-0.12652	0.0828323	0.128243	0.496942	Porridge_ready_Fish_fried_Chocolatemilk	126	126	0.129518	0.829902	-0.0195671	0.0842903	0.816825	0.975487	Porridge_ready_Fish_fried_Chocolatemilk	223	223	-0.0295003	0.594099	-0.0448337	0.0912872	0.623832	0.805783	Porridge_ready_Fish_fried_Chocolatemilk	871	871	-0.0289628	0.569582	0.00578508	0.0444583	0.896499	0.964667	Porridge_ready_Fish_fried_Chocolatemilk	145.747	140.749	120	505.935	0.0331055	-0.0259167	-0.782851	0.433714	0.640245	NS	NS	NS
P23_L-glutamine synthesis	Sweetened_tea_yoghurtdrink	205	205	0.111425	1.12755	0.0560953	0.0701023	0.424554	0.696408	Sweetened_tea_yoghurtdrink	126	126	0.0674218	0.540567	-0.152958	0.178792	0.393974	0.660465	Sweetened_tea_yoghurtdrink	223	223	0.00250442	0.480442	0.01271	0.138932	0.927193	0.99476	Sweetened_tea_yoghurtdrink	871	871	-0.0373747	0.434722	0.0491651	0.0759562	0.517621	0.809487	Sweetened_tea_yoghurtdrink	203.486	31.2827	51.8075	173.33	0.04663	0.0343764	0.737217	0.460991	0.644145	NS	NS	NS
P24_L-phenylalanine synthesis	Sweetened_tea_yoghurtdrink	205	205	0.111425	1.12755	0.0367876	0.0602785	0.542363	0.74193	Sweetened_tea_yoghurtdrink	126	126	0.0674218	0.540567	0.0959474	0.182125	0.59929	0.827956	Sweetened_tea_yoghurtdrink	223	223	0.00250442	0.480442	-0.159377	0.131377	0.226402	0.99476	Sweetened_tea_yoghurtdrink	871	871	-0.0373747	0.434722	0.0790327	0.0798247	0.322413	0.755618	Sweetened_tea_yoghurtdrink	275.217	30.1482	57.9374	156.937	0.0438428	0.0311135	0.709661	0.477914	0.644145	NS	NS	NS
P31_Anhydromuropeptides recycling	Sweetened_tea_yoghurtdrink	205	205	0.111425	1.12755	0.037147	0.051522	0.47176	0.696408	Sweetened_tea_yoghurtdrink	126	126	0.0674218	0.540567	0.0851674	0.168555	0.61429	0.827956	Sweetened_tea_yoghurtdrink	223	223	0.00250442	0.480442	0.00091968	0.139867	0.99476	0.99476	Sweetened_tea_yoghurtdrink	871	871	-0.0373747	0.434722	0.0134571	0.080666	0.867547	0.90899	Sweetened_tea_yoghurtdrink	376.716	35.1978	51.1174	153.68	0.0402679	0.0309815	0.769386	0.441664	0.644145	NS	NS	NS
P31_Anhydromuropeptides recycling	Bread_Legumes	205	205	-0.0736819	0.691941	-0.0601364	0.090944	0.509219	0.631431	Bread_Legumes	126	126	0.0277121	0.583927	0.172329	0.16361	0.294322	0.546841	Bread_Legumes	223	223	-0.116311	0.444079	0.0817105	0.165686	0.622394	0.96661	Bread_Legumes	871	871	0.0435099	0.579569	0.0439741	0.0680165	0.518113	0.771332	Bread_Legumes	120.907	37.3578	36.4275	216.158	0.0493353	0.0283528	0.574697	0.565497	0.649274	NS	NS	NS
P5_Biotin and FA-synthesis (E. coli)	Bread_Legumes	205	205	-0.0736819	0.691941	-0.0790654	0.0943767	0.403168	0.568101	Bread_Legumes	126	126	0.0277121	0.583927	-0.150132	0.150814	0.321509	0.546841	Bread_Legumes	223	223	-0.116311	0.444079	-0.103904	0.143416	0.469541	0.96661	Bread_Legumes	871	871	0.0435099	0.579569	0.0225447	0.0559859	0.687279	0.789433	Bread_Legumes	112.272	43.9659	48.6191	319.039	0.0436896	-0.0254566	-0.58267	0.560116	0.649274	NS	NS	NS
P20_Terpenoid synthesis via mevalonate	Pasta_Pizza	205	205	-0.126846	0.636288	-0.183748	0.104317	0.0796991	0.123534	Pasta_Pizza	126	126	-0.0709619	0.607965	-0.157438	0.154314	0.309664	0.928157	Pasta_Pizza	223	223	0.00315542	0.506156	-0.128434	0.14776	0.385696	0.734359	Pasta_Pizza	871	871	0.0399249	0.617093	0.055924	0.0596279	0.348566	0.857822	Pasta_Pizza	91.8954	41.9943	45.8023	281.255	0.0465773	-0.0296144	-0.635812	0.524899	0.650875	NS	NS	NS
P16_Bifidobacterium shunt	Sweetened_tea_yoghurtdrink	205	205	0.111425	1.12755	-0.0628089	0.0692885	0.365776	0.696408	Sweetened_tea_yoghurtdrink	126	126	0.0674218	0.540567	-0.290451	0.177479	0.104347	0.366301	Sweetened_tea_yoghurtdrink	223	223	0.00250442	0.480442	0.00150341	0.140669	0.991483	0.99476	Sweetened_tea_yoghurtdrink	871	871	-0.0373747	0.434722	0.0457946	0.0762669	0.548362	0.809487	Sweetened_tea_yoghurtdrink	208.294	31.7474	50.536	171.921	0.0464991	-0.0310375	-0.667485	0.504463	0.651598	NS	NS	NS
P28_UTP and CTP degradation	Sugar_Sweets	205	205	0.184389	1.11711	-0.0405242	0.0842797	0.631166	0.749186	Sugar_Sweets	126	126	0.0308263	0.62208	-0.102953	0.143587	0.474765	0.928887	Sugar_Sweets	223	223	-0.0900997	0.489801	0.0136661	0.141196	0.922984	0.957766	Sugar_Sweets	871	871	-0.0242716	0.577625	-0.0286845	0.0576431	0.618877	0.918668	Sugar_Sweets	140.784	48.5029	50.1596	300.958	0.043017	-0.0345038	-0.802096	0.422498	0.654871	NS	NS	NS
P29_DMK synthesis	Rolls_Spreads	205	205	0.00970005	1.07387	0.00682878	0.0999114	0.945577	0.977096	Rolls_Spreads	126	126	0.0143831	0.689611	0.21508	0.255594	0.401748	0.775689	Rolls_Spreads	223	223	-0.16152	0.433979	0.0839456	0.241099	0.728043	0.94514	Rolls_Spreads	871	871	0.0374261	0.602796	0.0651845	0.0966325	0.500136	0.969013	Rolls_Spreads	100.177	15.3072	17.2032	107.091	0.0645795	0.0517192	0.800861	0.423212	0.655978	NS	NS	NS
P29_DMK synthesis	Sweetened_tea_yoghurtdrink	205	205	0.111425	1.12755	0.0174494	0.0508208	0.731696	0.810092	Sweetened_tea_yoghurtdrink	126	126	0.0674218	0.540567	-0.102999	0.122874	0.403555	0.660465	Sweetened_tea_yoghurtdrink	223	223	0.00250442	0.480442	-0.140465	0.0992645	0.158486	0.99476	Sweetened_tea_yoghurtdrink	871	871	-0.0373747	0.434722	-0.0123071	0.0557177	0.825235	0.90899	Sweetened_tea_yoghurtdrink	387.184	66.2341	101.487	322.117	0.0337672	-0.0208497	-0.617455	0.536935	0.665799	NS	NS	NS
P17_Polyamine synthesis	Sweetened_tea_yoghurtdrink	205	205	0.111425	1.12755	-0.0322304	0.0682817	0.637429	0.790412	Sweetened_tea_yoghurtdrink	126	126	0.0674218	0.540567	0.0317189	0.172174	0.854148	0.945663	Sweetened_tea_yoghurtdrink	223	223	0.00250442	0.480442	-0.0163041	0.131536	0.901468	0.99476	Sweetened_tea_yoghurtdrink	871	871	-0.0373747	0.434722	-0.036459	0.0798178	0.647946	0.867476	Sweetened_tea_yoghurtdrink	214.483	33.7337	57.7974	156.964	0.0464751	-0.0270163	-0.581308	0.561033	0.668924	NS	NS	NS
P29_DMK synthesis	Cheese_Butter	205	205	-0.0931494	0.425837	0.1158	0.126144	0.359729	0.55791	Cheese_Butter	126	126	-0.00880917	0.675371	0.0212697	0.0968383	0.826524	0.88394	Cheese_Butter	223	223	-0.0538434	0.563146	-0.061438	0.0865361	0.478486	0.932114	Cheese_Butter	871	871	0.0356952	0.679706	-0.0422208	0.0362833	0.24489	0.569218	Cheese_Butter	62.8449	106.636	133.538	759.602	0.0306768	-0.0289188	-0.942691	0.345839	0.670063	NS	NS	NS
P17_Polyamine synthesis	Bread_Legumes	205	205	-0.0736819	0.691941	0.136718	0.12018	0.25665	0.447896	Bread_Legumes	126	126	0.0277121	0.583927	-0.159447	0.167106	0.341918	0.546841	Bread_Legumes	223	223	-0.116311	0.444079	-0.0847443	0.155804	0.587058	0.96661	Bread_Legumes	871	871	0.0435099	0.579569	0.0380256	0.0673121	0.572279	0.771332	Bread_Legumes	69.237	35.8109	41.1948	220.706	0.0522032	0.023593	0.451946	0.651308	0.673018	NS	NS	NS
P11_Mixed acid fermentation	Bread_Legumes	205	205	-0.0736819	0.691941	0.0542901	0.130904	0.678784	0.701411	Bread_Legumes	126	126	0.0277121	0.583927	0.22524	0.18842	0.234282	0.546841	Bread_Legumes	223	223	-0.116311	0.444079	0.0452734	0.161103	0.778961	0.96661	Bread_Legumes	871	871	0.0435099	0.579569	-0.00705197	0.0593988	0.905523	0.919437	Bread_Legumes	58.3573	28.1674	38.5296	283.429	0.0494781	0.022665	0.458082	0.646893	0.673018	NS	NS	NS
P6_Ferment. glutamate and pyruvate	Bread_Legumes	205	205	-0.0736819	0.691941	-0.0826077	0.104883	0.431859	0.582071	Bread_Legumes	126	126	0.0277121	0.583927	0.00184769	0.169225	0.991307	0.991307	Bread_Legumes	223	223	-0.116311	0.444079	0.0971418	0.147831	0.511804	0.96661	Bread_Legumes	871	871	0.0435099	0.579569	0.0374885	0.052713	0.477164	0.771332	Bread_Legumes	90.9048	34.9196	45.7581	359.886	0.0433772	0.0197409	0.455099	0.649038	0.673018	NS	NS	NS
P10_FA and beta-oxidation	Cheese_Butter	205	205	-0.0931494	0.425837	0.0237031	0.0796516	0.766332	0.92533	Cheese_Butter	126	126	-0.00880917	0.675371	0.0572318	0.0766537	0.456773	0.88394	Cheese_Butter	223	223	-0.0538434	0.563146	0.0754289	0.049435	0.128517	0.932114	Cheese_Butter	871	871	0.0356952	0.679706	0.00142324	0.0209315	0.945805	0.995317	Cheese_Butter	157.62	170.19	409.196	2282.44	0.0181985	0.0157612	0.866069	0.386453	0.673882	NS	NS	NS
P11_Mixed acid fermentation	Cheese_Butter	205	205	-0.0931494	0.425837	0.0453877	0.1845	0.805932	0.92533	Cheese_Butter	126	126	-0.00880917	0.675371	0.0775307	0.152769	0.612733	0.88394	Cheese_Butter	223	223	-0.0538434	0.563146	-0.052963	0.118054	0.654143	0.932114	Cheese_Butter	871	871	0.0356952	0.679706	-0.0446639	0.0458737	0.330514	0.569218	Cheese_Butter	29.3771	42.8479	71.7531	475.197	0.0401877	-0.032897	-0.818583	0.413024	0.673882	NS	NS	NS
P24_L-phenylalanine synthesis	Cheese_Butter	205	205	-0.0931494	0.425837	-0.00854222	0.15003	0.954653	0.954653	Cheese_Butter	126	126	-0.00880917	0.675371	0.109227	0.142964	0.446355	0.88394	Cheese_Butter	223	223	-0.0538434	0.563146	-0.1523	0.114058	0.18318	0.932114	Cheese_Butter	871	871	0.0356952	0.679706	-0.0356495	0.0520363	0.493472	0.728458	Cheese_Butter	44.4268	48.9271	76.8692	369.307	0.0430519	-0.036899	-0.857081	0.3914	0.673882	NS	NS	NS
P14_Sucrose degradation, heme synthesis (aerobic)	Fastfood	205	205	0.059247	0.613728	-0.138786	0.141203	0.326859	0.991927	Fastfood	126	126	0.0181697	0.719587	0.34361	0.192845	0.0773122	0.52958	Fastfood	223	223	-0.0641103	0.381483	-0.291667	0.175429	0.0978383	0.357636	Fastfood	871	871	8.79047e-06	0.532809	-0.0298106	0.0721179	0.679446	0.880985	Fastfood	50.1545	26.8896	32.4935	192.271	0.0575618	-0.0428424	-0.744286	0.456703	0.674181	NS	NS	NS
P23_L-glutamine synthesis	Fastfood	205	205	0.059247	0.613728	-0.175629	0.179992	0.330369	0.991927	Fastfood	126	126	0.0181697	0.719587	0.290972	0.226269	0.200934	0.692105	Fastfood	223	223	-0.0641103	0.381483	0.38619	0.226405	0.0894853	0.357636	Fastfood	871	871	8.79047e-06	0.532809	0.0161884	0.0907883	0.858522	0.978988	Fastfood	30.8668	19.5321	19.5087	121.322	0.072314	0.0510396	0.705805	0.480309	0.6768	NS	NS	NS
P10_FA and beta-oxidation	Porridge_ready_Fish_fried_Chocolatemilk	205	205	0.0773975	0.762121	-0.00972317	0.0449426	0.82894	0.937806	Porridge_ready_Fish_fried_Chocolatemilk	126	126	0.129518	0.829902	0.0118794	0.0639337	0.852914	0.975487	Porridge_ready_Fish_fried_Chocolatemilk	223	223	-0.0295003	0.594099	-0.0130019	0.0467208	0.781057	0.901095	Porridge_ready_Fish_fried_Chocolatemilk	871	871	-0.0289628	0.569582	-0.0176291	0.0241897	0.466333	0.833965	Porridge_ready_Fish_fried_Chocolatemilk	495.09	244.647	458.121	1708.99	0.0185477	-0.0130698	-0.70466	0.481022	0.677803	NS	NS	NS
P7_Colanic acid building blocks synthesis	Pasta_Pizza	205	205	-0.126846	0.636288	0.0457719	0.0890143	0.607677	0.607677	Pasta_Pizza	126	126	-0.0709619	0.607965	0.0729736	0.156926	0.642761	0.928157	Pasta_Pizza	223	223	0.00315542	0.506156	-0.00313127	0.116405	0.978564	0.978564	Pasta_Pizza	871	871	0.0399249	0.617093	-0.0608465	0.0521034	0.243208	0.857822	Pasta_Pizza	126.206	40.6076	73.7996	368.356	0.0405231	-0.0228325	-0.563445	0.573132	0.68335	NS	NS	NS
P11_Mixed acid fermentation	Sweetened_tea_yoghurtdrink	205	205	0.111425	1.12755	0.0128258	0.0742021	0.862945	0.89171	Sweetened_tea_yoghurtdrink	126	126	0.0674218	0.540567	-0.232682	0.193415	0.231337	0.580409	Sweetened_tea_yoghurtdrink	223	223	0.00250442	0.480442	0.108709	0.135746	0.424111	0.99476	Sweetened_tea_yoghurtdrink	871	871	-0.0373747	0.434722	0.0455351	0.0704134	0.518009	0.809487	Sweetened_tea_yoghurtdrink	181.622	26.7313	54.2681	201.692	0.0464082	0.0241066	0.519448	0.603448	0.692848	NS	NS	NS
P4_Ferment. acetylene to acetate	Dairy_Lean_beef	205	205	-0.201195	0.55624	0.0227514	0.0593956	0.702093	0.936721	Dairy_Lean_beef	126	126	-0.146976	0.56817	-0.0342417	0.0718609	0.634585	0.942544	Dairy_Lean_beef	223	223	0.0254258	0.537627	-0.00306308	0.0558343	0.956301	0.974796	Dairy_Lean_beef	871	871	0.0612162	0.608226	0.0312465	0.0231982	0.178356	0.641809	Dairy_Lean_beef	283.46	193.649	320.774	1858.19	0.0194035	0.0214217	1.10401	0.269588	0.696435	NS	NS	NS
P11_Mixed acid fermentation	Pasta_Pizza	205	205	-0.126846	0.636288	0.121679	0.132972	0.36126	0.399967	Pasta_Pizza	126	126	-0.0709619	0.607965	0.134499	0.192314	0.485673	0.928157	Pasta_Pizza	223	223	0.00315542	0.506156	-0.152925	0.152683	0.317659	0.734359	Pasta_Pizza	871	871	0.0399249	0.617093	0.0220754	0.0578308	0.70276	0.857822	Pasta_Pizza	56.5558	27.0383	42.8962	299.007	0.0484788	0.0248159	0.511892	0.608727	0.698908	NS	NS	NS
P17_Polyamine synthesis	Spreads_sweet	205	205	-0.0555374	0.536875	-0.143306	0.142422	0.315536	0.767382	Spreads_sweet	126	126	0.0129582	0.465282	-0.23611	0.202085	0.244974	0.94189	Spreads_sweet	223	223	-0.0241369	0.470388	-0.0692481	0.143553	0.630018	0.965036	Spreads_sweet	871	871	0.0180257	0.519839	0.0238412	0.068457	0.727726	0.822256	Spreads_sweet	49.3001	24.4867	48.5258	213.385	0.054579	-0.0331237	-0.606894	0.543921	0.702565	NS	NS	NS
P14_Sucrose degradation, heme synthesis (aerobic)	Sweetened_tea_yoghurtdrink	205	205	0.111425	1.12755	0.0221911	0.0550629	0.68737	0.793416	Sweetened_tea_yoghurtdrink	126	126	0.0674218	0.540567	0.1158	0.153434	0.451894	0.673928	Sweetened_tea_yoghurtdrink	223	223	0.00250442	0.480442	0.0247682	0.107605	0.818171	0.99476	Sweetened_tea_yoghurtdrink	871	871	-0.0373747	0.434722	-0.00643172	0.0603551	0.915159	0.915159	Sweetened_tea_yoghurtdrink	329.824	42.4774	86.3649	274.519	0.0369312	0.017201	0.465758	0.641389	0.710109	NS	NS	NS
P2_Aerobic respiration, ECA-, LPS-, heme-synthesis	Rolls_Spreads	205	205	0.00970005	1.07387	0.117957	0.0921403	0.201969	0.726473	Rolls_Spreads	126	126	0.0143831	0.689611	0.119775	0.150677	0.428287	0.775689	Rolls_Spreads	223	223	-0.16152	0.433979	0.102391	0.182817	0.576008	0.939802	Rolls_Spreads	871	871	0.0374261	0.602796	-0.0319119	0.0644027	0.620369	0.978707	Rolls_Spreads	117.788	44.0458	29.9202	241.097	0.0480652	0.0335893	0.698829	0.484659	0.715449	NS	NS	NS
P10_FA and beta-oxidation	Pasta_Pizza	205	205	-0.126846	0.636288	0.0780286	0.0573374	0.175103	0.208776	Pasta_Pizza	126	126	-0.0709619	0.607965	0.074367	0.0973749	0.446559	0.928157	Pasta_Pizza	223	223	0.00315542	0.506156	0.0180908	0.0643171	0.778769	0.923337	Pasta_Pizza	871	871	0.0399249	0.617093	-0.0104219	0.0257844	0.686169	0.857822	Pasta_Pizza	304.175	105.464	241.739	1504.14	0.0215389	0.00940593	0.436694	0.662333	0.733297	NS	NS	NS
P7_Colanic acid building blocks synthesis	Spreads_sweet	205	205	-0.0555374	0.536875	-0.195531	0.10274	0.0584617	0.453079	Spreads_sweet	126	126	0.0129582	0.465282	0.065601	0.187079	0.726459	0.94189	Spreads_sweet	223	223	-0.0241369	0.470388	-0.00559598	0.11291	0.960517	0.968561	Spreads_sweet	871	871	0.0180257	0.519839	0.0822288	0.0543871	0.13092	0.288234	Spreads_sweet	94.7378	28.5726	78.4395	338.072	0.0430403	0.0198407	0.460981	0.644812	0.734323	NS	NS	NS
P29_DMK synthesis	Spreads_sweet	205	205	-0.0555374	0.536875	-0.00439446	0.106243	0.967048	0.967048	Spreads_sweet	126	126	0.0129582	0.465282	-0.0760771	0.145276	0.601471	0.94189	Spreads_sweet	223	223	-0.0241369	0.470388	-0.045164	0.108843	0.678592	0.965036	Spreads_sweet	871	871	0.0180257	0.519839	0.0433036	0.0477634	0.364857	0.535484	Spreads_sweet	88.5935	47.3821	84.4107	438.337	0.0389626	0.016965	0.435418	0.663259	0.734323	NS	NS	NS
P4_Ferment. acetylene to acetate	Spreads_sweet	205	205	-0.0555374	0.536875	-0.122934	0.0623293	0.0499572	0.453079	Spreads_sweet	126	126	0.0129582	0.465282	0.0262143	0.0905354	0.772662	0.94189	Spreads_sweet	223	223	-0.0241369	0.470388	-0.03838	0.0643872	0.551745	0.965036	Spreads_sweet	871	871	0.0180257	0.519839	0.011292	0.0269611	0.675448	0.805342	Spreads_sweet	257.404	122.001	241.213	1375.7	0.0223813	-0.0111049	-0.496168	0.619776	0.734323	NS	NS	NS
P18_Formaldehyde assimilation	Spreads_sweet	205	205	-0.0555374	0.536875	-0.412964	0.135809	0.00267728	0.0829958	Spreads_sweet	126	126	0.0129582	0.465282	-0.0637163	0.195156	0.744623	0.94189	Spreads_sweet	223	223	-0.0241369	0.470388	0.165452	0.138885	0.23484	0.965036	Spreads_sweet	871	871	0.0180257	0.519839	0.0141155	0.0567242	0.803541	0.849439	Spreads_sweet	54.2178	26.2565	51.8433	310.787	0.0475058	-0.0250471	-0.527242	0.598025	0.734323	NS	NS	NS
P5_Biotin and FA-synthesis (E. coli)	Fruit_Juice_Milk	205	205	0.0499406	0.971662	0.100012	0.0594134	0.0938812	0.422035	Fruit_Juice_Milk	126	126	0.0470696	0.883709	-0.0870711	0.110281	0.431355	0.993163	Fruit_Juice_Milk	223	223	-0.0460608	0.585582	0.137902	0.102123	0.17831	0.976547	Fruit_Juice_Milk	871	871	-0.00752221	0.66348	0.0563506	0.0455184	0.216062	0.940602	Fruit_Juice_Milk	283.29	82.2239	95.8859	482.643	0.0325465	0.0652439	2.00464	0.0450019	0.745627	NS	NS	NS
P17_Polyamine synthesis	Fruit_Juice_Milk	205	205	0.0499406	0.971662	0.143883	0.0756222	0.0585297	0.422035	Fruit_Juice_Milk	126	126	0.0470696	0.883709	0.00504554	0.12247	0.967206	0.993163	Fruit_Juice_Milk	223	223	-0.0460608	0.585582	-0.0167037	0.111345	0.88089	0.976547	Fruit_Juice_Milk	871	871	-0.00752221	0.66348	0.0543664	0.0547493	0.320984	0.940602	Fruit_Juice_Milk	174.864	66.6718	80.6601	333.613	0.0390491	0.0644797	1.65125	0.0986883	0.745627	NS	NS	NS
P31_Anhydromuropeptides recycling	Fruit_Juice_Milk	205	205	0.0499406	0.971662	0.11556	0.0570351	0.0440867	0.422035	Fruit_Juice_Milk	126	126	0.0470696	0.883709	0.0220154	0.11999	0.854734	0.993163	Fruit_Juice_Milk	223	223	-0.0460608	0.585582	0.0496214	0.118351	0.675431	0.976547	Fruit_Juice_Milk	871	871	-0.00752221	0.66348	0.00281241	0.0553568	0.959492	0.985397	Fruit_Juice_Milk	307.408	69.4559	71.3933	326.331	0.0359306	0.0535945	1.49161	0.135801	0.745627	NS	NS	NS
P14_Sucrose degradation, heme synthesis (aerobic)	Fruit_Juice_Milk	205	205	0.0499406	0.971662	0.0536133	0.0614077	0.383677	0.684154	Fruit_Juice_Milk	126	126	0.0470696	0.883709	-0.000939245	0.109383	0.993163	0.993163	Fruit_Juice_Milk	223	223	-0.0460608	0.585582	0.140321	0.0906001	0.122888	0.976547	Fruit_Juice_Milk	871	871	-0.00752221	0.66348	0.00501635	0.0414178	0.903627	0.985397	Fruit_Juice_Milk	265.188	83.5789	121.827	582.944	0.0308088	0.0324224	1.05237	0.292628	0.745627	NS	NS	NS
P25_L-tyrosine synthesis	Fruit_Juice_Milk	205	205	0.0499406	0.971662	0.0850989	0.0729937	0.245075	0.538822	Fruit_Juice_Milk	126	126	0.0470696	0.883709	0.0401755	0.134692	0.766007	0.993163	Fruit_Juice_Milk	223	223	-0.0460608	0.585582	-0.0413614	0.119025	0.72855	0.976547	Fruit_Juice_Milk	871	871	-0.00752221	0.66348	0.0142126	0.0529499	0.788443	0.985397	Fruit_Juice_Milk	187.685	55.1211	70.5872	356.672	0.0386315	0.0303492	0.785608	0.432097	0.745627	NS	NS	NS
P9_Enterobactin-, LPS-, quinone-synthesis (E.coli)	Fruit_Juice_Milk	205	205	0.0499406	0.971662	0.0961396	0.0658608	0.145938	0.422035	Fruit_Juice_Milk	126	126	0.0470696	0.883709	-0.0483179	0.0916278	0.598939	0.993163	Fruit_Juice_Milk	223	223	-0.0460608	0.585582	-0.00755246	0.0947243	0.936525	0.976547	Fruit_Juice_Milk	871	871	-0.00752221	0.66348	0.0210623	0.0396347	0.595272	0.940602	Fruit_Juice_Milk	230.54	119.109	111.449	636.573	0.0301831	0.0263967	0.874551	0.381818	0.745627	NS	NS	NS
P15_Methanogenesis	Fruit_Juice_Milk	205	205	0.0499406	0.971662	0.0145041	0.0212865	0.496499	0.702737	Fruit_Juice_Milk	126	126	0.0470696	0.883709	0.0633902	0.0957518	0.509224	0.993163	Fruit_Juice_Milk	223	223	-0.0460608	0.585582	0.00654826	0.109782	0.952491	0.976547	Fruit_Juice_Milk	871	871	-0.00752221	0.66348	0.0527861	0.0512547	0.303355	0.940602	Fruit_Juice_Milk	2206.95	109.07	82.9737	380.656	0.0189673	0.0214273	1.1297	0.258602	0.745627	NS	NS	NS
P4_Ferment. acetylene to acetate	Fruit_Juice_Milk	205	205	0.0499406	0.971662	-0.0578554	0.0333833	0.084633	0.422035	Fruit_Juice_Milk	126	126	0.0470696	0.883709	0.0736896	0.054161	0.176201	0.993163	Fruit_Juice_Milk	223	223	-0.0460608	0.585582	-0.0119004	0.0498036	0.811373	0.976547	Fruit_Juice_Milk	871	871	-0.00752221	0.66348	-0.0132222	0.0215857	0.540337	0.940602	Fruit_Juice_Milk	897.31	340.9	403.162	2146.2	0.0162487	-0.0158331	-0.974418	0.329849	0.745627	NS	NS	NS
P3_AA-synthesis	Fruit_Juice_Milk	205	205	0.0499406	0.971662	-0.086855	0.0559352	0.122065	0.422035	Fruit_Juice_Milk	126	126	0.0470696	0.883709	0.0294553	0.0837865	0.725791	0.993163	Fruit_Juice_Milk	223	223	-0.0460608	0.585582	0.0103941	0.0877244	0.905793	0.976547	Fruit_Juice_Milk	871	871	-0.00752221	0.66348	-0.0157169	0.0365767	0.667524	0.940602	Fruit_Juice_Milk	319.617	142.446	129.945	747.464	0.0273233	-0.0253545	-0.927944	0.353437	0.745627	NS	NS	NS
P12_Ferment. pyruvate and glycerol	Fruit_Juice_Milk	205	205	0.0499406	0.971662	-0.0295434	0.04359	0.498717	0.702737	Fruit_Juice_Milk	126	126	0.0470696	0.883709	0.0228343	0.0603516	0.705835	0.993163	Fruit_Juice_Milk	223	223	-0.0460608	0.585582	-0.0139157	0.0533842	0.794594	0.976547	Fruit_Juice_Milk	871	871	-0.00752221	0.66348	-0.0339327	0.0220729	0.124586	0.940602	Fruit_Juice_Milk	526.292	274.551	350.893	2052.49	0.017666	-0.0261557	-1.48057	0.138722	0.745627	NS	NS	NS
P1_AA-synthesis and starch degradation	Fruit_Juice_Milk	205	205	0.0499406	0.971662	-0.119328	0.075048	0.113425	0.422035	Fruit_Juice_Milk	126	126	0.0470696	0.883709	0.0642231	0.120959	0.596435	0.993163	Fruit_Juice_Milk	223	223	-0.0460608	0.585582	-0.0245029	0.118416	0.836265	0.976547	Fruit_Juice_Milk	871	871	-0.00752221	0.66348	-0.00625629	0.0496544	0.899764	0.985397	Fruit_Juice_Milk	177.551	68.3479	71.3142	405.588	0.0371955	-0.0291673	-0.784162	0.432945	0.745627	NS	NS	NS
P30_Mannan degradation	Fruit_Juice_Milk	205	205	0.0499406	0.971662	-0.149541	0.0983629	0.130024	0.422035	Fruit_Juice_Milk	126	126	0.0470696	0.883709	0.0610996	0.139901	0.663088	0.993163	Fruit_Juice_Milk	223	223	-0.0460608	0.585582	-0.0573293	0.118997	0.630455	0.976547	Fruit_Juice_Milk	871	871	-0.00752221	0.66348	-0.0131925	0.0421582	0.75441	0.985397	Fruit_Juice_Milk	103.356	51.0929	70.6197	562.647	0.0356299	-0.030221	-0.84819	0.396332	0.745627	NS	NS	NS
P29_DMK synthesis	Fruit_Juice_Milk	205	205	0.0499406	0.971662	-0.0670426	0.0565796	0.23746	0.538822	Fruit_Juice_Milk	126	126	0.0470696	0.883709	0.0285306	0.0876067	0.745244	0.993163	Fruit_Juice_Milk	223	223	-0.0460608	0.585582	-0.0554965	0.084331	0.511185	0.976547	Fruit_Juice_Milk	871	871	-0.00752221	0.66348	-0.0203476	0.0382304	0.5947	0.940602	Fruit_Juice_Milk	312.378	130.294	140.613	684.2	0.0280885	-0.0307306	-1.09406	0.273927	0.745627	NS	NS	NS
P21_Glycogen degradation	Fruit_Juice_Milk	205	205	0.0499406	0.971662	-0.144578	0.0910782	0.114009	0.422035	Fruit_Juice_Milk	126	126	0.0470696	0.883709	0.145373	0.15251	0.342404	0.993163	Fruit_Juice_Milk	223	223	-0.0460608	0.585582	0.00319887	0.108688	0.976547	0.976547	Fruit_Juice_Milk	871	871	-0.00752221	0.66348	-0.0287436	0.0476821	0.546788	0.940602	Fruit_Juice_Milk	120.551	42.9935	84.6513	439.835	0.0381238	-0.0342289	-0.897837	0.369272	0.745627	NS	NS	NS
P27_dTTP synthesis	Fruit_Juice_Milk	205	205	0.0499406	0.971662	-0.0991614	0.0824324	0.230428	0.538822	Fruit_Juice_Milk	126	126	0.0470696	0.883709	0.219362	0.128481	0.0903437	0.993163	Fruit_Juice_Milk	223	223	-0.0460608	0.585582	0.0722691	0.1147	0.529313	0.976547	Fruit_Juice_Milk	871	871	-0.00752221	0.66348	-0.0787002	0.0520001	0.130527	0.940602	Fruit_Juice_Milk	147.165	60.5789	76.0098	369.822	0.0391158	-0.038123	-0.97462	0.329749	0.745627	NS	NS	NS
P11_Mixed acid fermentation	Fruit_Juice_Milk	205	205	0.0499406	0.971662	0.0020721	0.0828829	0.98008	0.988075	Fruit_Juice_Milk	126	126	0.0470696	0.883709	-0.118691	0.137962	0.391332	0.993163	Fruit_Juice_Milk	223	223	-0.0460608	0.585582	-0.0232111	0.115069	0.840329	0.976547	Fruit_Juice_Milk	871	871	-0.00752221	0.66348	-0.0545624	0.0482963	0.258898	0.940602	Fruit_Juice_Milk	145.569	52.5388	75.5233	428.719	0.0377332	-0.0442502	-1.17271	0.240911	0.745627	NS	NS	NS
P16_Bifidobacterium shunt	Fruit_Juice_Milk	205	205	0.0499406	0.971662	-0.170947	0.0765958	0.0267434	0.422035	Fruit_Juice_Milk	126	126	0.0470696	0.883709	0.0162899	0.127618	0.898643	0.993163	Fruit_Juice_Milk	223	223	-0.0460608	0.585582	-0.185748	0.118408	0.118173	0.976547	Fruit_Juice_Milk	871	871	-0.00752221	0.66348	0.0130922	0.0523461	0.802563	0.985397	Fruit_Juice_Milk	170.447	61.4011	71.3239	364.948	0.0386877	-0.0547917	-1.41626	0.1567	0.745627	NS	NS	NS
P19_Biotin biosynthesis II (Bacillus subtilis)	Fruit_Juice_Milk	205	205	0.0499406	0.971662	-0.0468417	0.0679351	0.491308	0.702737	Fruit_Juice_Milk	126	126	0.0470696	0.883709	0.0344087	0.114806	0.764916	0.993163	Fruit_Juice_Milk	223	223	-0.0460608	0.585582	0.00953261	0.118761	0.936099	0.976547	Fruit_Juice_Milk	871	871	-0.00752221	0.66348	-0.122793	0.055153	0.0262433	0.813542	Fruit_Juice_Milk	216.676	75.8701	70.9009	328.747	0.0380089	-0.0682337	-1.7952	0.0726217	0.745627	NS	NS	NS
P20_Terpenoid synthesis via mevalonate	Wine_Alcohol	205	205	-0.27214	0.559289	-0.235347	0.111489	0.036026	0.101528	Wine_Alcohol	126	126	-0.21131	0.583969	-0.181728	0.138879	0.193194	0.670977	Wine_Alcohol	223	223	-0.0117566	0.664384	-0.0661088	0.0936464	0.480982	0.889056	Wine_Alcohol	871	871	0.0981863	0.783786	0.0359284	0.0398757	0.367834	0.831533	Wine_Alcohol	80.4513	51.8471	114.03	628.902	0.0338017	-0.0151948	-0.449528	0.653051	0.749799	NS	NS	NS
P6_Ferment. glutamate and pyruvate	Eggs_Alcoholic_drinks	205	205	-0.104303	0.43925	0.330534	0.147529	0.0261657	0.202784	Eggs_Alcoholic_drinks	126	126	-0.134042	0.302491	-0.138827	0.323633	0.668717	0.900415	Eggs_Alcoholic_drinks	223	223	-0.0546888	0.448173	-0.01468	0.133618	0.912618	0.943039	Eggs_Alcoholic_drinks	871	871	0.0583724	0.606478	-0.000623182	0.048532	0.989758	0.989758	Eggs_Alcoholic_drinks	45.9458	9.54762	56.0105	424.565	0.0431906	0.0238297	0.551734	0.581131	0.750627	NS	NS	NS
P12_Ferment. pyruvate and glycerol	Eggs_Alcoholic_drinks	205	205	-0.104303	0.43925	0.145081	0.0975527	0.13855	0.545366	Eggs_Alcoholic_drinks	126	126	-0.134042	0.302491	0.310525	0.155737	0.0484296	0.505429	Eggs_Alcoholic_drinks	223	223	-0.0546888	0.448173	0.0286753	0.0674778	0.671288	0.873112	Eggs_Alcoholic_drinks	871	871	0.0583724	0.606478	-0.00464977	0.0250177	0.852599	0.975509	Eggs_Alcoholic_drinks	105.08	41.2305	219.623	1597.73	0.0225666	0.0137075	0.607424	0.54357	0.750627	NS	NS	NS
P22_Peptidoglycan synthesis IV (Enterococcus faecium)	Eggs_Alcoholic_drinks	205	205	-0.104303	0.43925	0.114043	0.167017	0.495511	0.715499	Eggs_Alcoholic_drinks	126	126	-0.134042	0.302491	-0.264911	0.353876	0.455564	0.830735	Eggs_Alcoholic_drinks	223	223	-0.0546888	0.448173	-0.276524	0.14362	0.0554874	0.70834	Eggs_Alcoholic_drinks	871	871	0.0583724	0.606478	0.00220905	0.0609455	0.971094	0.989758	Eggs_Alcoholic_drinks	35.8492	7.98543	48.4811	269.225	0.0525922	-0.0299787	-0.570021	0.568663	0.750627	NS	NS	NS
P19_Biotin biosynthesis II (Bacillus subtilis)	Eggs_Alcoholic_drinks	205	205	-0.104303	0.43925	-0.013856	0.152821	0.927847	0.933638	Eggs_Alcoholic_drinks	126	126	-0.134042	0.302491	0.373056	0.299124	0.214768	0.673678	Eggs_Alcoholic_drinks	223	223	-0.0546888	0.448173	0.0189595	0.15015	0.899635	0.943039	Eggs_Alcoholic_drinks	871	871	0.0583724	0.606478	-0.0616806	0.0625312	0.324214	0.670042	Eggs_Alcoholic_drinks	42.819	11.1763	44.3556	255.745	0.0531422	-0.0320746	-0.603561	0.546136	0.750627	NS	NS	NS
P16_Bifidobacterium shunt	Sugar_Sweets	205	205	0.184389	1.11711	0.0312247	0.0766122	0.684028	0.757317	Sugar_Sweets	126	126	0.0308263	0.62208	0.217449	0.152695	0.157021	0.928887	Sugar_Sweets	223	223	-0.0900997	0.489801	-0.164265	0.151865	0.280607	0.790802	Sugar_Sweets	871	871	-0.0242716	0.577625	0.0224913	0.061863	0.71627	0.918668	Sugar_Sweets	170.374	42.8894	43.3596	261.299	0.0439408	0.0258739	0.588835	0.555972	0.755078	NS	NS	NS
P4_Ferment. acetylene to acetate	Sugar_Sweets	205	205	0.184389	1.11711	-0.000227588	0.033242	0.994544	0.994544	Sugar_Sweets	126	126	0.0308263	0.62208	-0.0250354	0.065807	0.704293	0.928887	Sugar_Sweets	223	223	-0.0900997	0.489801	0.00834082	0.0639315	0.89632	0.957766	Sugar_Sweets	871	871	-0.0242716	0.577625	-0.019117	0.0254849	0.453382	0.918668	Sugar_Sweets	904.95	230.917	244.664	1539.69	0.0185051	-0.0114308	-0.617712	0.536765	0.755078	NS	NS	NS
P29_DMK synthesis	Sugar_Sweets	205	205	0.184389	1.11711	-0.0346143	0.0560631	0.537666	0.749186	Sugar_Sweets	126	126	0.0308263	0.62208	0.027784	0.105713	0.793136	0.928887	Sugar_Sweets	223	223	-0.0900997	0.489801	0.0584504	0.107875	0.588488	0.874796	Sugar_Sweets	871	871	-0.0242716	0.577625	-0.0301356	0.0451785	0.504929	0.918668	Sugar_Sweets	318.16	89.4841	85.9327	489.933	0.0318868	-0.0185746	-0.582516	0.560219	0.755078	NS	NS	NS
P23_L-glutamine synthesis	Porridge_ready_Fish_fried_Chocolatemilk	205	205	0.0773975	0.762121	0.0339046	0.0986527	0.731453	0.937806	Porridge_ready_Fish_fried_Chocolatemilk	126	126	0.129518	0.829902	-0.00286939	0.117223	0.980512	0.986609	Porridge_ready_Fish_fried_Chocolatemilk	223	223	-0.0295003	0.594099	-0.0267042	0.113389	0.814036	0.901095	Porridge_ready_Fish_fried_Chocolatemilk	871	871	-0.0289628	0.569582	0.0397886	0.0584569	0.496276	0.833965	Porridge_ready_Fish_fried_Chocolatemilk	102.75	72.7731	77.7781	292.636	0.0427985	0.0235219	0.549595	0.582597	0.755683	NS	NS	NS
P15_Methanogenesis	Porridge_ready_Fish_fried_Chocolatemilk	205	205	0.0773975	0.762121	0.00659765	0.0274793	0.810527	0.937806	Porridge_ready_Fish_fried_Chocolatemilk	126	126	0.129518	0.829902	-0.0433041	0.0880738	0.623844	0.975487	Porridge_ready_Fish_fried_Chocolatemilk	223	223	-0.0295003	0.594099	-0.0953331	0.105658	0.36791	0.648464	Porridge_ready_Fish_fried_Chocolatemilk	871	871	-0.0289628	0.569582	-0.0597143	0.0574829	0.299179	0.760182	Porridge_ready_Fish_fried_Chocolatemilk	1324.3	128.916	89.5763	302.637	0.0232783	-0.0127107	-0.546031	0.585045	0.755683	NS	NS	NS
P13_Ferment. to butanoate	Vegetables_Fruit_Tea	205	205	-0.11222	0.77642	-0.0752029	0.0629038	0.233305	0.49647	Vegetables_Fruit_Tea	126	126	-0.000156026	0.675955	0.0931865	0.107103	0.386002	0.854719	Vegetables_Fruit_Tea	223	223	0.0418139	0.681131	-0.0173365	0.0708812	0.807009	0.992246	Vegetables_Fruit_Tea	871	871	0.0161285	0.690431	0.0480535	0.033948	0.157281	0.327916	Vegetables_Fruit_Tea	252.724	87.176	199.039	867.704	0.0266629	0.0194531	0.729594	0.465638	0.756591	NS	NS	NS
P3_AA-synthesis	Vegetables_Fruit_Tea	205	205	-0.11222	0.77642	0.141429	0.0691461	0.0421344	0.326719	Vegetables_Fruit_Tea	126	126	-0.000156026	0.675955	-0.114244	0.0969878	0.241158	0.692696	Vegetables_Fruit_Tea	223	223	0.0418139	0.681131	-0.00642502	0.0743925	0.931255	0.992246	Vegetables_Fruit_Tea	871	871	0.0161285	0.690431	-0.0472914	0.0335215	0.158669	0.327916	Vegetables_Fruit_Tea	209.153	106.308	180.693	889.926	0.02686	-0.0186219	-0.693297	0.488123	0.756591	NS	NS	NS
P18_Formaldehyde assimilation	Dairy_Lean_beef	205	205	-0.201195	0.55624	0.0774008	0.131048	0.555438	0.936721	Dairy_Lean_beef	126	126	-0.146976	0.56817	-0.0329067	0.155034	0.832268	0.942544	Dairy_Lean_beef	223	223	0.0254258	0.537627	0.207431	0.120155	0.0857066	0.531381	Dairy_Lean_beef	871	871	0.0612162	0.608226	-0.0988767	0.0486156	0.0422715	0.26338	Dairy_Lean_beef	58.2293	41.6053	69.2651	423.106	0.0410926	-0.0410832	-0.999772	0.317421	0.756927	NS	NS	NS
P10_FA and beta-oxidation	Sugar_Sweets	205	205	0.184389	1.11711	0.0244159	0.035235	0.489157	0.749186	Sugar_Sweets	126	126	0.0308263	0.62208	0.0596327	0.083579	0.476952	0.928887	Sugar_Sweets	223	223	-0.0900997	0.489801	0.0603663	0.0617332	0.329239	0.850533	Sugar_Sweets	871	871	-0.0242716	0.577625	-0.0100389	0.025471	0.693583	0.918668	Sugar_Sweets	805.472	143.155	262.399	1541.37	0.019061	0.0103798	0.544561	0.586056	0.756989	NS	NS	NS
P1_AA-synthesis and starch degradation	Savoury_snacks	205	205	-0.0114351	0.501597	0.0657591	0.147421	0.656038	0.924418	Savoury_snacks	126	126	0.0331572	0.582506	-0.237731	0.158659	0.13666	0.843566	Savoury_snacks	223	223	-0.010086	0.411775	0.574664	0.162059	0.000479088	0.00672966	Savoury_snacks	871	871	0.000932337	0.495994	0.0546771	0.0674419	0.417745	0.942412	Savoury_snacks	46.0132	39.7258	38.076	219.857	0.0539421	0.0799709	1.48253	0.138199	0.762099	NS	NS	NS
P16_Bifidobacterium shunt	Savoury_snacks	205	205	-0.0114351	0.501597	0.138945	0.15078	0.357898	0.898958	Savoury_snacks	126	126	0.0331572	0.582506	0.00837371	0.168763	0.960509	0.960509	Savoury_snacks	223	223	-0.010086	0.411775	0.245542	0.166772	0.142384	0.389631	Savoury_snacks	871	871	0.000932337	0.495994	0.0182276	0.0711705	0.797925	0.942412	Savoury_snacks	43.9861	35.111	35.9544	197.424	0.0565708	0.0602689	1.06537	0.286708	0.762099	NS	NS	NS
P30_Mannan degradation	Savoury_snacks	205	205	-0.0114351	0.501597	-0.0405596	0.192745	0.833547	0.93221	Savoury_snacks	126	126	0.0331572	0.582506	-0.184663	0.184374	0.318567	0.960509	Savoury_snacks	223	223	-0.010086	0.411775	0.392505	0.165448	0.0185475	0.0821389	Savoury_snacks	871	871	0.000932337	0.495994	0.0428877	0.0573036	0.454405	0.942412	Savoury_snacks	26.9173	29.4173	36.5325	304.534	0.0501632	0.0525311	1.0472	0.295006	0.762099	NS	NS	NS
P3_AA-synthesis	Savoury_snacks	205	205	-0.0114351	0.501597	0.0535813	0.109581	0.625403	0.923215	Savoury_snacks	126	126	0.0331572	0.582506	-0.177934	0.109654	0.107282	0.843566	Savoury_snacks	223	223	-0.010086	0.411775	0.409527	0.120307	0.000790782	0.00672966	Savoury_snacks	871	871	0.000932337	0.495994	0.028581	0.0497261	0.565597	0.942412	Savoury_snacks	83.2785	83.1663	69.091	404.419	0.0395299	0.0461241	1.16682	0.243285	0.762099	NS	NS	NS
P12_Ferment. pyruvate and glycerol	Savoury_snacks	205	205	-0.0114351	0.501597	0.0686471	0.0850863	0.420753	0.898958	Savoury_snacks	126	126	0.0331572	0.582506	-0.119071	0.0791094	0.134916	0.843566	Savoury_snacks	223	223	-0.010086	0.411775	0.21779	0.0736818	0.00346299	0.0214705	Savoury_snacks	871	871	0.000932337	0.495994	0.0105859	0.0300483	0.724703	0.942412	Savoury_snacks	138.128	159.788	184.196	1107.54	0.0250812	0.0266072	1.06084	0.288762	0.762099	NS	NS	NS
P29_DMK synthesis	Savoury_snacks	205	205	-0.0114351	0.501597	-0.00655636	0.110631	0.952802	0.961977	Savoury_snacks	126	126	0.0331572	0.582506	-0.0630105	0.115754	0.587211	0.960509	Savoury_snacks	223	223	-0.010086	0.411775	0.0557232	0.118755	0.639377	0.861769	Savoury_snacks	871	871	0.000932337	0.495994	-0.0661356	0.0519385	0.203237	0.942412	Savoury_snacks	81.7046	74.6327	70.9083	370.699	0.0408949	-0.0431537	-1.05523	0.291319	0.762099	NS	NS	NS
P5_Biotin and FA-synthesis (E. coli)	Savoury_snacks	205	205	-0.0114351	0.501597	0.0232685	0.116575	0.841997	0.93221	Savoury_snacks	126	126	0.0331572	0.582506	0.185937	0.145218	0.202874	0.898443	Savoury_snacks	223	223	-0.010086	0.411775	-0.362615	0.142227	0.011476	0.0592927	Savoury_snacks	871	871	0.000932337	0.495994	-0.0578193	0.0619112	0.350612	0.942412	Savoury_snacks	73.5851	47.4195	49.4352	260.893	0.0481497	-0.0521207	-1.08247	0.279044	0.762099	NS	NS	NS
P19_Biotin biosynthesis II (Bacillus subtilis)	Savoury_snacks	205	205	-0.0114351	0.501597	-0.00632587	0.132527	0.961977	0.961977	Savoury_snacks	126	126	0.0331572	0.582506	-0.173677	0.151039	0.252479	0.960509	Savoury_snacks	223	223	-0.010086	0.411775	-0.0411172	0.167137	0.805907	0.925301	Savoury_snacks	871	871	0.000932337	0.495994	-0.06205	0.0751718	0.409348	0.942412	Savoury_snacks	56.9368	43.8351	35.7979	176.966	0.056475	-0.0651472	-1.15356	0.248682	0.762099	NS	NS	NS
P26_Thiamin synthesis	Savoury_snacks	205	205	-0.0114351	0.501597	-0.257309	0.146936	0.0814587	0.631305	Savoury_snacks	126	126	0.0331572	0.582506	-0.247501	0.176439	0.163271	0.843566	Savoury_snacks	223	223	-0.010086	0.411775	0.00481345	0.15897	0.975872	0.975872	Savoury_snacks	871	871	0.000932337	0.495994	-0.047805	0.0711243	0.501678	0.942412	Savoury_snacks	46.3171	32.1226	39.5705	197.681	0.0562819	-0.0922671	-1.63937	0.101136	0.762099	NS	NS	NS
P27_dTTP synthesis	Rolls_Spreads	205	205	0.00970005	1.07387	0.0455113	0.145545	0.754839	0.967716	Rolls_Spreads	126	126	0.0143831	0.689611	-0.126397	0.380146	0.740095	0.895101	Rolls_Spreads	223	223	-0.16152	0.433979	0.433214	0.326667	0.18618	0.835311	Rolls_Spreads	871	871	0.0374261	0.602796	0.0163447	0.131623	0.901203	0.978707	Rolls_Spreads	47.2068	6.91988	9.37106	57.7212	0.090827	0.0517815	0.570112	0.568602	0.766376	NS	NS	NS
P18_Formaldehyde assimilation	Rolls_Spreads	205	205	0.00970005	1.07387	-0.0435596	0.130614	0.739109	0.967716	Rolls_Spreads	126	126	0.0143831	0.689611	0.263755	0.343281	0.443796	0.775689	Rolls_Spreads	223	223	-0.16152	0.433979	0.353205	0.307679	0.252247	0.835311	Rolls_Spreads	871	871	0.0374261	0.602796	0.0511901	0.114728	0.655574	0.978707	Rolls_Spreads	58.6168	8.48597	10.5634	75.9732	0.0806768	0.0475465	0.589346	0.555629	0.766376	NS	NS	NS
P24_L-phenylalanine synthesis	Savoury_snacks	205	205	-0.0114351	0.501597	0.0462632	0.131263	0.724877	0.93221	Savoury_snacks	126	126	0.0331572	0.582506	0.0370663	0.171447	0.829202	0.960509	Savoury_snacks	223	223	-0.010086	0.411775	-0.0883567	0.156947	0.574037	0.829529	Savoury_snacks	871	871	0.000932337	0.495994	0.0950316	0.07445	0.20214	0.942412	Savoury_snacks	58.0381	34.0203	40.5968	180.414	0.0565171	0.0559112	0.989279	0.322526	0.769102	NS	NS	NS
P15_Methanogenesis	Meat_Potatoes_Gravy	205	205	0.0092388	0.66643	-0.00338911	0.0379813	0.928996	0.989803	Meat_Potatoes_Gravy	126	126	0.0317397	0.612627	0.215371	0.136808	0.11806	0.332716	Meat_Potatoes_Gravy	223	223	-0.12186	0.546907	0.2495	0.133507	0.0629958	0.602171	Meat_Potatoes_Gravy	871	871	0.0247565	0.537179	0.0175238	0.0693335	0.800524	0.919121	Meat_Potatoes_Gravy	693.202	53.4289	56.1037	208.024	0.031454	0.0265157	0.842998	0.399229	0.778	NS	NS	NS
P6_Ferment. glutamate and pyruvate	Meat_Potatoes_Gravy	205	205	0.0092388	0.66643	0.0190191	0.111472	0.864698	0.989803	Meat_Potatoes_Gravy	126	126	0.0317397	0.612627	0.260814	0.176424	0.141937	0.365303	Meat_Potatoes_Gravy	223	223	-0.12186	0.546907	-0.0600104	0.129491	0.643518	0.883152	Meat_Potatoes_Gravy	871	871	0.0247565	0.537179	-0.0821029	0.0579366	0.156809	0.40509	Meat_Potatoes_Gravy	80.4759	32.1281	59.6378	297.916	0.0461188	-0.0385586	-0.836071	0.403115	0.778	NS	NS	NS
P27_dTTP synthesis	Meat_Potatoes_Gravy	205	205	0.0092388	0.66643	0.0903284	0.138579	0.515271	0.989803	Meat_Potatoes_Gravy	126	126	0.0317397	0.612627	0.0642423	0.187262	0.732153	0.782646	Meat_Potatoes_Gravy	223	223	-0.12186	0.546907	-0.185686	0.140169	0.186653	0.602171	Meat_Potatoes_Gravy	871	871	0.0247565	0.537179	-0.0574409	0.0703672	0.414552	0.611958	Meat_Potatoes_Gravy	52.0718	28.5167	50.8977	201.957	0.0547632	-0.0435338	-0.794946	0.426645	0.778	NS	NS	NS
P18_Formaldehyde assimilation	Fruit_Juice_Milk	205	205	0.0499406	0.971662	0.0117662	0.074242	0.874235	0.981904	Fruit_Juice_Milk	126	126	0.0470696	0.883709	0.115815	0.11718	0.32497	0.993163	Fruit_Juice_Milk	223	223	-0.0460608	0.585582	-0.192753	0.107228	0.0736293	0.976547	Fruit_Juice_Milk	871	871	-0.00752221	0.66348	-0.0293418	0.0453792	0.518067	0.940602	Fruit_Juice_Milk	181.426	72.8267	86.9735	485.609	0.0347769	-0.0247255	-0.710976	0.477099	0.778425	NS	NS	NS
P18_Formaldehyde assimilation	Bread_Legumes	205	205	-0.0736819	0.691941	-0.0568369	0.117245	0.628373	0.695699	Bread_Legumes	126	126	0.0277121	0.583927	0.0712197	0.161014	0.659053	0.817226	Bread_Legumes	223	223	-0.116311	0.444079	0.14476	0.150931	0.338569	0.96661	Bread_Legumes	871	871	0.0435099	0.579569	-0.0341845	0.0557718	0.54008	0.771332	Bread_Legumes	72.7461	38.5722	43.8977	321.492	0.0458009	-0.0126345	-0.275858	0.782657	0.782657	NS	NS	NS
P22_Peptidoglycan synthesis IV (Enterococcus faecium)	Pasta_Pizza	205	205	-0.126846	0.636288	-0.0735649	0.119532	0.538967	0.556932	Pasta_Pizza	126	126	-0.0709619	0.607965	-0.146047	0.187953	0.438667	0.928157	Pasta_Pizza	223	223	0.00315542	0.506156	-0.314052	0.150844	0.0385182	0.597031	Pasta_Pizza	871	871	0.0399249	0.617093	0.068659	0.06443	0.286885	0.857822	Pasta_Pizza	69.9893	28.3074	43.9485	240.893	0.0510884	-0.0170842	-0.334405	0.738074	0.788976	NS	NS	NS
P27_dTTP synthesis	Spreads_sweet	205	205	-0.0555374	0.536875	-0.195373	0.154184	0.206585	0.767382	Spreads_sweet	126	126	0.0129582	0.465282	0.314479	0.213861	0.144048	0.897772	Spreads_sweet	223	223	-0.0241369	0.470388	0.118126	0.147869	0.42525	0.965036	Spreads_sweet	871	871	0.0180257	0.519839	-0.0434378	0.0650562	0.504506	0.651653	Spreads_sweet	42.0649	21.8643	45.7346	236.278	0.0537649	-0.017932	-0.333527	0.738737	0.789684	NS	NS	NS
P19_Biotin biosynthesis II (Bacillus subtilis)	Pasta_Pizza	205	205	-0.126846	0.636288	-0.107893	0.109082	0.323818	0.371791	Pasta_Pizza	126	126	-0.0709619	0.607965	-0.0446647	0.159876	0.780442	0.933709	Pasta_Pizza	223	223	0.00315542	0.506156	-0.0506259	0.157895	0.7488	0.923337	Pasta_Pizza	871	871	0.0399249	0.617093	0.0302893	0.0661788	0.647291	0.857822	Pasta_Pizza	84.0408	39.1229	40.1108	228.33	0.0505332	-0.0151416	-0.299637	0.764454	0.789936	NS	NS	NS
P14_Sucrose degradation, heme synthesis (aerobic)	Meat_Potatoes_Gravy	205	205	0.0092388	0.66643	-0.0426456	0.103123	0.679657	0.989803	Meat_Potatoes_Gravy	126	126	0.0317397	0.612627	0.194418	0.1566	0.216847	0.42014	Meat_Potatoes_Gravy	223	223	-0.12186	0.546907	-0.163878	0.111119	0.141717	0.602171	Meat_Potatoes_Gravy	871	871	0.0247565	0.537179	0.0798148	0.0559293	0.153921	0.40509	Meat_Potatoes_Gravy	94.034	40.7769	80.9886	319.685	0.0432142	0.0301801	0.698383	0.484938	0.791214	NS	NS	NS
P13_Ferment. to butanoate	Meat_Potatoes_Gravy	205	205	0.0092388	0.66643	-0.105851	0.0849275	0.214096	0.989803	Meat_Potatoes_Gravy	126	126	0.0317397	0.612627	0.184363	0.131965	0.164975	0.365303	Meat_Potatoes_Gravy	223	223	-0.12186	0.546907	0.00594344	0.102476	0.953803	0.985137	Meat_Potatoes_Gravy	871	871	0.0247565	0.537179	0.0555629	0.050049	0.267234	0.48731	Meat_Potatoes_Gravy	138.645	57.4221	95.2258	399.217	0.0380553	0.0270214	0.710055	0.47767	0.791214	NS	NS	NS
P15_Methanogenesis	Pastry_Sweets	205	205	-0.0467602	0.641192	-0.039405	0.0345614	0.255724	0.81081	Pastry_Sweets	126	126	0.0864701	0.764689	0.0809555	0.132194	0.541431	0.729755	Pastry_Sweets	223	223	0.04413	0.575045	0.0120577	0.12088	0.920635	0.984127	Pastry_Sweets	871	871	-0.0122277	0.629675	-0.0235476	0.0588139	0.68898	0.928625	Pastry_Sweets	837.178	57.2241	68.4373	289.095	0.0282624	-0.0274285	-0.970493	0.331801	0.791217	NS	NS	NS
P11_Mixed acid fermentation	Wine_Alcohol	205	205	-0.27214	0.559289	0.270511	0.141598	0.057517	0.131852	Wine_Alcohol	126	126	-0.21131	0.583969	0.123725	0.173544	0.477273	0.721901	Wine_Alcohol	223	223	-0.0117566	0.664384	0.0841822	0.096764	0.385276	0.889056	Wine_Alcohol	871	871	0.0981863	0.783786	-0.0237847	0.0386672	0.538642	0.838228	Wine_Alcohol	49.8755	33.2032	106.8	668.828	0.0341254	0.0124405	0.364553	0.715445	0.7921	NS	NS	NS
P25_L-tyrosine synthesis	Pastry_Sweets	205	205	-0.0467602	0.641192	-0.0496674	0.119163	0.677273	0.944112	Pastry_Sweets	126	126	0.0864701	0.764689	-0.162528	0.185381	0.382388	0.698324	Pastry_Sweets	223	223	0.04413	0.575045	0.10596	0.130898	0.419122	0.984127	Pastry_Sweets	871	871	-0.0122277	0.629675	0.0635479	0.0606916	0.295364	0.832389	Pastry_Sweets	70.4232	29.0985	58.3624	271.483	0.0482598	0.0354224	0.733993	0.462953	0.797308	NS	NS	NS
P10_FA and beta-oxidation	Pastry_Sweets	205	205	-0.0467602	0.641192	-0.0396917	0.0583225	0.496948	0.81081	Pastry_Sweets	126	126	0.0864701	0.764689	-0.0817098	0.0959342	0.396091	0.698324	Pastry_Sweets	223	223	0.04413	0.575045	-0.0285762	0.053279	0.592268	0.984127	Pastry_Sweets	871	871	-0.0122277	0.629675	0.0421903	0.0247117	0.0881297	0.795174	Pastry_Sweets	293.987	108.656	352.28	1637.55	0.0204445	0.0160815	0.786594	0.43152	0.797308	NS	NS	NS
P11_Mixed acid fermentation	Pastry_Sweets	205	205	-0.0467602	0.641192	-0.158537	0.134438	0.239704	0.81081	Pastry_Sweets	126	126	0.0864701	0.764689	-0.283083	0.189249	0.137324	0.698324	Pastry_Sweets	223	223	0.04413	0.575045	-0.196334	0.126013	0.12068	0.467635	Pastry_Sweets	871	871	-0.0122277	0.629675	0.03995	0.0554145	0.471148	0.928625	Pastry_Sweets	55.3295	27.9212	62.9753	325.651	0.0460347	-0.0339711	-0.737946	0.460547	0.797308	NS	NS	NS
P6_Ferment. glutamate and pyruvate	Pastry_Sweets	205	205	-0.0467602	0.641192	-0.0748786	0.108082	0.489246	0.81081	Pastry_Sweets	126	126	0.0864701	0.764689	-0.200923	0.169546	0.238333	0.698324	Pastry_Sweets	223	223	0.04413	0.575045	0.0379167	0.116343	0.744811	0.984127	Pastry_Sweets	871	871	-0.0122277	0.629675	-0.026915	0.0491974	0.584463	0.928625	Pastry_Sweets	85.604	34.7878	73.8788	413.158	0.0405744	-0.0357548	-0.881215	0.378202	0.797308	NS	NS	NS
P19_Biotin biosynthesis II (Bacillus subtilis)	Pastry_Sweets	205	205	-0.0467602	0.641192	0.0121163	0.110705	0.912958	0.979632	Pastry_Sweets	126	126	0.0864701	0.764689	0.12523	0.158104	0.429883	0.698324	Pastry_Sweets	223	223	0.04413	0.575045	0.0773568	0.130665	0.554452	0.984127	Pastry_Sweets	871	871	-0.0122277	0.629675	-0.108774	0.0633272	0.0862194	0.795174	Pastry_Sweets	81.5954	40.0048	58.5705	249.355	0.0482509	-0.0386334	-0.800678	0.423318	0.797308	NS	NS	NS
P1_AA-synthesis and starch degradation	Ready_meals	205	205	-0.0761095	0.668047	0.081614	0.112131	0.467567	0.905911	Ready_meals	126	126	-0.0726462	0.963861	0.191035	0.0965819	0.0502247	0.623848	Ready_meals	223	223	0.0593805	0.744316	0.0652378	0.0906539	0.472523	0.963447	Ready_meals	871	871	0.0135936	0.640699	0.0080065	0.0518142	0.877233	0.996983	Ready_meals	79.5338	107.203	121.682	372.48	0.0383229	0.0556488	1.4521	0.146473	0.798606	NS	NS	NS
P11_Mixed acid fermentation	Ready_meals	205	205	-0.0761095	0.668047	-0.102778	0.122693	0.403215	0.886688	Ready_meals	126	126	-0.0726462	0.963861	0.0203893	0.112137	0.856028	0.972055	Ready_meals	223	223	0.0593805	0.744316	0.0306671	0.0881716	0.728319	0.977777	Ready_meals	871	871	0.0135936	0.640699	0.0948351	0.0503645	0.0600393	0.98222	Ready_meals	66.4293	79.5241	128.63	394.231	0.0386676	0.0540144	1.39689	0.162446	0.798606	NS	NS	NS
P18_Formaldehyde assimilation	Ready_meals	205	205	-0.0761095	0.668047	0.0366139	0.110072	0.739759	0.969182	Ready_meals	126	126	-0.0726462	0.963861	0.11884	0.094733	0.212108	0.700289	Ready_meals	223	223	0.0593805	0.744316	0.0871002	0.0825763	0.292696	0.963447	Ready_meals	871	871	0.0135936	0.640699	-0.000181397	0.0473959	0.996947	0.996983	Ready_meals	82.5372	111.429	146.653	445.163	0.0356738	0.0368511	1.033	0.301602	0.798606	NS	NS	NS
P28_UTP and CTP degradation	Ready_meals	205	205	-0.0761095	0.668047	0.0515709	0.126476	0.683893	0.969182	Ready_meals	126	126	-0.0726462	0.963861	-0.0443439	0.096573	0.646939	0.771351	Ready_meals	223	223	0.0593805	0.744316	0.0439697	0.0845702	0.60365	0.963447	Ready_meals	871	871	0.0135936	0.640699	0.0528864	0.0509042	0.299123	0.98222	Ready_meals	62.5153	107.223	139.819	385.916	0.0379193	0.0359852	0.948997	0.342622	0.798606	NS	NS	NS
P6_Ferment. glutamate and pyruvate	Ready_meals	205	205	-0.0761095	0.668047	0.187667	0.0976869	0.0561468	0.580183	Ready_meals	126	126	-0.0726462	0.963861	0.15882	0.0990783	0.11157	0.623848	Ready_meals	223	223	0.0593805	0.744316	0.0463131	0.0809354	0.567763	0.963447	Ready_meals	871	871	0.0135936	0.640699	-0.0252005	0.0447916	0.573841	0.98222	Ready_meals	104.792	101.869	152.659	498.434	0.0341443	0.0353879	1.03642	0.300006	0.798606	NS	NS	NS
P3_AA-synthesis	Ready_meals	205	205	-0.0761095	0.668047	0.0491683	0.0833758	0.556048	0.969182	Ready_meals	126	126	-0.0726462	0.963861	0.131191	0.0668741	0.0521059	0.623848	Ready_meals	223	223	0.0593805	0.744316	0.0501194	0.0671471	0.456227	0.963447	Ready_meals	871	871	0.0135936	0.640699	-0.00455444	0.0381967	0.905116	0.996983	Ready_meals	143.853	223.606	221.792	685.405	0.0280094	0.0348349	1.24369	0.213614	0.798606	NS	NS	NS
P10_FA and beta-oxidation	Ready_meals	205	205	-0.0761095	0.668047	0.0130373	0.0530585	0.806157	0.969182	Ready_meals	126	126	-0.0726462	0.963861	-0.0669941	0.0726567	0.358377	0.700289	Ready_meals	223	223	0.0593805	0.744316	-0.0395878	0.0369961	0.28579	0.963447	Ready_meals	871	871	0.0135936	0.640699	-0.0130074	0.022539	0.564018	0.98222	Ready_meals	355.214	189.43	730.614	1968.48	0.0175581	-0.019295	-1.09892	0.271801	0.798606	NS	NS	NS
P15_Methanogenesis	Ready_meals	205	205	-0.0761095	0.668047	-0.00302058	0.0385493	0.937631	0.969182	Ready_meals	126	126	-0.0726462	0.963861	-0.08425	0.0773603	0.27831	0.700289	Ready_meals	223	223	0.0593805	0.744316	-0.0422815	0.0840872	0.615594	0.963447	Ready_meals	871	871	0.0135936	0.640699	-0.0412707	0.053534	0.440961	0.98222	Ready_meals	672.925	167.095	141.429	348.932	0.0274165	-0.0274289	-1.00045	0.317091	0.798606	NS	NS	NS
P7_Colanic acid building blocks synthesis	Ready_meals	205	205	-0.0761095	0.668047	-0.0130504	0.0821546	0.873947	0.969182	Ready_meals	126	126	-0.0726462	0.963861	-0.0985694	0.0909682	0.280733	0.700289	Ready_meals	223	223	0.0593805	0.744316	-0.0798869	0.0668664	0.233499	0.963447	Ready_meals	871	871	0.0135936	0.640699	0.00964342	0.0455003	0.832202	0.996983	Ready_meals	148.162	120.843	223.658	483.028	0.0320143	-0.0277283	-0.866124	0.386422	0.798606	NS	NS	NS
P2_Aerobic respiration, ECA-, LPS-, heme-synthesis	Ready_meals	205	205	-0.0761095	0.668047	-0.0991643	0.0776504	0.203069	0.856228	Ready_meals	126	126	-0.0726462	0.963861	-0.0682702	0.0414353	0.102134	0.623848	Ready_meals	223	223	0.0593805	0.744316	-0.0242466	0.0490501	0.621579	0.963447	Ready_meals	871	871	0.0135936	0.640699	-0.00942406	0.0266045	0.723254	0.98222	Ready_meals	165.849	582.451	415.642	1412.83	0.0196998	-0.0308925	-1.56816	0.116844	0.798606	NS	NS	NS
P9_Enterobactin-, LPS-, quinone-synthesis (E.coli)	Ready_meals	205	205	-0.0761095	0.668047	-0.0327774	0.0981605	0.738795	0.969182	Ready_meals	126	126	-0.0726462	0.963861	-0.135591	0.0733062	0.0668249	0.623848	Ready_meals	223	223	0.0593805	0.744316	-0.0420473	0.0725406	0.56276	0.963447	Ready_meals	871	871	0.0135936	0.640699	-0.00152626	0.0413929	0.970595	0.996983	Ready_meals	103.783	186.088	190.037	583.646	0.0306634	-0.0352731	-1.15033	0.250007	0.798606	NS	NS	NS
P13_Ferment. to butanoate	Ready_meals	205	205	-0.0761095	0.668047	-0.00459484	0.0753981	0.951467	0.969182	Ready_meals	126	126	-0.0726462	0.963861	-0.0876476	0.0743995	0.241101	0.700289	Ready_meals	223	223	0.0593805	0.744316	-0.0655006	0.063913	0.30658	0.963447	Ready_meals	871	871	0.0135936	0.640699	-0.019997	0.0386774	0.605275	0.98222	Ready_meals	175.905	180.659	244.806	668.476	0.0280624	-0.0362603	-1.29213	0.196311	0.798606	NS	NS	NS
P22_Peptidoglycan synthesis IV (Enterococcus faecium)	Ready_meals	205	205	-0.0761095	0.668047	-0.162023	0.10976	0.141481	0.856228	Ready_meals	126	126	-0.0726462	0.963861	0.0151889	0.109653	0.890063	0.972055	Ready_meals	223	223	0.0593805	0.744316	-0.0380834	0.0877591	0.664753	0.970276	Ready_meals	871	871	0.0135936	0.640699	-0.0171588	0.0562557	0.760428	0.98222	Ready_meals	83.0066	83.1679	129.842	315.985	0.0404226	-0.0368505	-0.911631	0.361963	0.798606	NS	NS	NS
P16_Bifidobacterium shunt	Ready_meals	205	205	-0.0761095	0.668047	-0.0319307	0.114976	0.781519	0.969182	Ready_meals	126	126	-0.0726462	0.963861	0.011802	0.103427	0.909342	0.972055	Ready_meals	223	223	0.0593805	0.744316	0.0366105	0.0912262	0.688583	0.970276	Ready_meals	871	871	0.0135936	0.640699	-0.0796559	0.0545941	0.144912	0.98222	Ready_meals	75.6457	93.4833	120.16	335.513	0.0400063	-0.0378337	-0.945693	0.344305	0.798606	NS	NS	NS
P20_Terpenoid synthesis via mevalonate	Ready_meals	205	205	-0.0761095	0.668047	-0.204605	0.0958761	0.0340618	0.570427	Ready_meals	126	126	-0.0726462	0.963861	-0.0574727	0.0900453	0.524518	0.700289	Ready_meals	223	223	0.0593805	0.744316	-0.076502	0.0851457	0.369923	0.963447	Ready_meals	871	871	0.0135936	0.640699	-0.000196917	0.052058	0.996983	0.996983	Ready_meals	108.788	123.333	137.935	368.999	0.0367842	-0.054085	-1.47033	0.141472	0.798606	NS	NS	NS
P15_Methanogenesis	Cheese_Butter	205	205	-0.0931494	0.425837	-0.0704869	0.0469799	0.135253	0.381168	Cheese_Butter	126	126	-0.00880917	0.675371	0.11459	0.105492	0.279547	0.88394	Cheese_Butter	223	223	-0.0538434	0.563146	-0.0565228	0.112606	0.616211	0.932114	Cheese_Butter	871	871	0.0356952	0.679706	0.0138777	0.048702	0.77575	0.96193	Cheese_Butter	453.082	89.8589	78.8634	421.606	0.030958	-0.0194037	-0.626775	0.530806	0.805459	NS	NS	NS
P22_Peptidoglycan synthesis IV (Enterococcus faecium)	Cheese_Butter	205	205	-0.0931494	0.425837	0.15694	0.165312	0.34359	0.55791	Cheese_Butter	126	126	-0.00880917	0.675371	-0.0548089	0.149453	0.714466	0.88394	Cheese_Butter	223	223	-0.0538434	0.563146	0.0298589	0.117557	0.799739	0.932114	Cheese_Butter	871	871	0.0356952	0.679706	-0.0508407	0.0511364	0.320396	0.569218	Cheese_Butter	36.5924	44.7706	72.3612	382.419	0.0431877	-0.026099	-0.604316	0.545634	0.805459	NS	NS	NS
P28_UTP and CTP degradation	Sweetened_tea_yoghurtdrink	205	205	0.111425	1.12755	-0.114797	0.0759581	0.132295	0.455682	Sweetened_tea_yoghurtdrink	126	126	0.0674218	0.540567	0.0607731	0.167603	0.71754	0.88975	Sweetened_tea_yoghurtdrink	223	223	0.00250442	0.480442	0.0903957	0.130294	0.488562	0.99476	Sweetened_tea_yoghurtdrink	871	871	-0.0373747	0.434722	0.0963708	0.0710084	0.17508	0.577794	Sweetened_tea_yoghurtdrink	173.321	35.5989	58.9045	198.326	0.0463166	0.0143824	0.310523	0.756163	0.808312	NS	NS	NS
P29_DMK synthesis	Pasta_Pizza	205	205	-0.126846	0.636288	0.197069	0.0902086	0.0300868	0.0666209	Pasta_Pizza	126	126	-0.0709619	0.607965	-0.208426	0.120555	0.0864011	0.928157	Pasta_Pizza	223	223	0.00315542	0.506156	-0.0886545	0.112095	0.429874	0.734359	Pasta_Pizza	871	871	0.0399249	0.617093	-0.0195914	0.0457504	0.668596	0.857822	Pasta_Pizza	122.886	68.8065	79.584	477.76	0.0365383	-0.00873035	-0.238937	0.811154	0.811154	NS	NS	NS
P20_Terpenoid synthesis via mevalonate	Eggs_Alcoholic_drinks	205	205	-0.104303	0.43925	0.100879	0.146747	0.492608	0.715499	Eggs_Alcoholic_drinks	126	126	-0.134042	0.302491	0.0417765	0.29172	0.886366	0.922419	Eggs_Alcoholic_drinks	223	223	-0.0546888	0.448173	-0.124843	0.140473	0.375128	0.70834	Eggs_Alcoholic_drinks	871	871	0.0583724	0.606478	0.0326534	0.0563839	0.562655	0.969017	Eggs_Alcoholic_drinks	46.4369	11.7508	50.6777	314.55	0.0485978	0.0215386	0.443201	0.657621	0.815449	NS	NS	NS
P5_Biotin and FA-synthesis (E. coli)	Coffee_milk_Soup	205	205	-0.0190486	0.599621	0.0707075	0.102402	0.490691	0.938852	Coffee_milk_Soup	126	126	0.00261508	0.755444	0.142711	0.109329	0.194275	0.66473	Coffee_milk_Soup	223	223	-0.00397076	0.684592	0.142031	0.0845649	0.0944838	0.804693	Coffee_milk_Soup	871	871	0.00528062	0.524601	-0.0291919	0.0553873	0.598293	0.739658	Coffee_milk_Soup	95.3636	83.6623	139.836	325.971	0.03938	0.045016	1.14312	0.25299	0.817193	NS	NS	NS
P2_Aerobic respiration, ECA-, LPS-, heme-synthesis	Coffee_milk_Soup	205	205	-0.0190486	0.599621	0.123976	0.0896591	0.168291	0.938852	Coffee_milk_Soup	126	126	0.00261508	0.755444	0.151674	0.049499	0.00271458	0.0841521	Coffee_milk_Soup	223	223	-0.00397076	0.684592	0.0991396	0.0527206	0.0613832	0.804693	Coffee_milk_Soup	871	871	0.00528062	0.524601	-0.0291474	0.0309666	0.346838	0.671999	Coffee_milk_Soup	124.397	408.139	359.782	1042.83	0.0227323	0.0426838	1.87767	0.0604261	0.817193	NS	NS	NS
P3_AA-synthesis	Coffee_milk_Soup	205	205	-0.0190486	0.599621	-0.104422	0.096137	0.278714	0.938852	Coffee_milk_Soup	126	126	0.00261508	0.755444	-0.156736	0.082242	0.0590694	0.516247	Coffee_milk_Soup	223	223	-0.00397076	0.684592	-0.106812	0.0724478	0.141841	0.804693	Coffee_milk_Soup	871	871	0.00528062	0.524601	0.043796	0.0444545	0.324808	0.671999	Coffee_milk_Soup	108.198	147.847	190.524	506.02	0.0324002	-0.0342853	-1.05818	0.289972	0.817193	NS	NS	NS
P29_DMK synthesis	Coffee_milk_Soup	205	205	-0.0190486	0.599621	-0.0447543	0.0972365	0.64583	0.938852	Coffee_milk_Soup	126	126	0.00261508	0.755444	-0.00259817	0.0872767	0.9763	0.9763	Coffee_milk_Soup	223	223	-0.00397076	0.684592	-0.049664	0.0699797	0.478657	0.834615	Coffee_milk_Soup	871	871	0.00528062	0.524601	-0.0384175	0.0464747	0.408673	0.694899	Coffee_milk_Soup	105.765	131.281	204.2	462.985	0.0332552	-0.036498	-1.09751	0.272418	0.817193	NS	NS	NS
P4_Ferment. acetylene to acetate	Coffee_milk_Soup	205	205	-0.0190486	0.599621	-0.0283443	0.0575958	0.623174	0.938852	Coffee_milk_Soup	126	126	0.00261508	0.755444	-0.0793934	0.0538623	0.143098	0.618084	Coffee_milk_Soup	223	223	-0.00397076	0.684592	-0.0499546	0.0412328	0.227018	0.834615	Coffee_milk_Soup	871	871	0.00528062	0.524601	-0.0252072	0.0262764	0.33767	0.671999	Coffee_milk_Soup	301.452	344.691	588.185	1448.34	0.0193071	-0.037948	-1.9655	0.0493568	0.817193	NS	NS	NS
P6_Ferment. glutamate and pyruvate	Coffee_milk_Soup	205	205	-0.0190486	0.599621	-0.0158568	0.11391	0.889429	0.985898	Coffee_milk_Soup	126	126	0.00261508	0.755444	-0.138063	0.12239	0.261545	0.675658	Coffee_milk_Soup	223	223	-0.00397076	0.684592	-0.0464841	0.0876577	0.596453	0.834615	Coffee_milk_Soup	871	871	0.00528062	0.524601	-0.0357563	0.052154	0.493154	0.694899	Coffee_milk_Soup	77.0689	66.7593	130.143	367.642	0.0394788	-0.0461869	-1.16992	0.242034	0.817193	NS	NS	NS
P24_L-phenylalanine synthesis	Coffee_milk_Soup	205	205	-0.0190486	0.599621	-0.0456952	0.115422	0.692605	0.938852	Coffee_milk_Soup	126	126	0.00261508	0.755444	0.0333672	0.129099	0.796493	0.961396	Coffee_milk_Soup	223	223	-0.00397076	0.684592	0.0458511	0.0925613	0.620848	0.834615	Coffee_milk_Soup	871	871	0.00528062	0.524601	-0.126101	0.0665066	0.0582852	0.574454	Coffee_milk_Soup	75.0627	60.0003	116.719	226.084	0.0457454	-0.0514488	-1.12468	0.260726	0.817193	NS	NS	NS
P1_AA-synthesis and starch degradation	Coffee_milk_Soup	205	205	-0.0190486	0.599621	-0.211181	0.128544	0.101997	0.938852	Coffee_milk_Soup	126	126	0.00261508	0.755444	-0.220108	0.118906	0.0666125	0.516247	Coffee_milk_Soup	223	223	-0.00397076	0.684592	-0.147061	0.0977818	0.134043	0.804693	Coffee_milk_Soup	871	871	0.00528062	0.524601	0.0630062	0.0604162	0.297301	0.671999	Coffee_milk_Soup	60.52	70.7281	104.588	273.964	0.0442894	-0.0519183	-1.17225	0.241097	0.817193	NS	NS	NS
P27_dTTP synthesis	Coffee_milk_Soup	205	205	-0.0190486	0.599621	-0.00806968	0.141756	0.954661	0.985898	Coffee_milk_Soup	126	126	0.00261508	0.755444	-0.0266353	0.129463	0.837345	0.961396	Coffee_milk_Soup	223	223	-0.00397076	0.684592	-0.105777	0.0950124	0.266814	0.834615	Coffee_milk_Soup	871	871	0.00528062	0.524601	-0.0455927	0.0632931	0.471509	0.694899	Coffee_milk_Soup	49.7643	59.6637	110.774	249.625	0.0461351	-0.0534008	-1.15749	0.247073	0.817193	NS	NS	NS
P30_Mannan degradation	Coffee_milk_Soup	205	205	-0.0190486	0.599621	-0.204491	0.168896	0.227426	0.938852	Coffee_milk_Soup	126	126	0.00261508	0.755444	-0.217596	0.138001	0.11748	0.618084	Coffee_milk_Soup	223	223	-0.00397076	0.684592	-0.214906	0.0977325	0.02894	0.804693	Coffee_milk_Soup	871	871	0.00528062	0.524601	0.0179288	0.0512607	0.726606	0.805931	Coffee_milk_Soup	35.0561	52.5092	104.694	380.567	0.0417819	-0.0598274	-1.4319	0.152173	0.817193	NS	NS	NS
P17_Polyamine synthesis	Coffee_milk_Soup	205	205	-0.0190486	0.599621	-0.101619	0.13055	0.437263	0.938852	Coffee_milk_Soup	126	126	0.00261508	0.755444	0.047274	0.121879	0.698795	0.961396	Coffee_milk_Soup	223	223	-0.00397076	0.684592	0.0356449	0.0923845	0.7	0.834615	Coffee_milk_Soup	871	871	0.00528062	0.524601	-0.156203	0.0663971	0.0188679	0.486499	Coffee_milk_Soup	58.6739	67.3192	117.166	226.831	0.0461271	-0.072417	-1.56994	0.116428	0.817193	NS	NS	NS
P18_Formaldehyde assimilation	Savoury_snacks	205	205	-0.0114351	0.501597	0.210104	0.143899	0.145844	0.898958	Savoury_snacks	126	126	0.0331572	0.582506	-0.0153671	0.155575	0.921481	0.960509	Savoury_snacks	223	223	-0.010086	0.411775	0.0822805	0.151941	0.588698	0.829529	Savoury_snacks	871	871	0.000932337	0.495994	0.0182262	0.0617101	0.767796	0.942412	Savoury_snacks	48.2932	41.3163	43.3163	262.596	0.0502823	0.0451603	0.898136	0.369113	0.817321	NS	NS	NS
P26_Thiamin synthesis	Pastry_Sweets	205	205	-0.0467602	0.641192	0.00316175	0.123687	0.979632	0.979632	Pastry_Sweets	126	126	0.0864701	0.764689	0.191634	0.184841	0.301936	0.698324	Pastry_Sweets	223	223	0.04413	0.575045	-0.00094161	0.124364	0.993966	0.993966	Pastry_Sweets	871	871	-0.0122277	0.629675	0.0197226	0.0600078	0.742487	0.959045	Pastry_Sweets	65.3662	29.2688	64.6564	277.705	0.0478367	0.0257022	0.53729	0.591067	0.820567	NS	NS	NS
P4_Ferment. acetylene to acetate	Pastry_Sweets	205	205	-0.0467602	0.641192	-0.038813	0.0546765	0.478618	0.81081	Pastry_Sweets	126	126	0.0864701	0.764689	-0.0177392	0.0753112	0.814187	0.886289	Pastry_Sweets	223	223	0.04413	0.575045	-0.0272892	0.0547814	0.618887	0.984127	Pastry_Sweets	871	871	-0.0122277	0.629675	-0.00383306	0.0247595	0.877006	0.999045	Pastry_Sweets	334.502	176.312	333.222	1631.24	0.0200996	-0.0127083	-0.632267	0.527212	0.820567	NS	NS	NS
P3_AA-synthesis	Pastry_Sweets	205	205	-0.0467602	0.641192	0.0082529	0.0915924	0.928295	0.979632	Pastry_Sweets	126	126	0.0864701	0.764689	0.0801441	0.115472	0.488988	0.72184	Pastry_Sweets	223	223	0.04413	0.575045	-0.172093	0.0958882	0.074089	0.458453	Pastry_Sweets	871	871	-0.0122277	0.629675	-0.00595322	0.0419533	0.887191	0.999045	Pastry_Sweets	119.201	74.9973	108.76	568.156	0.0338815	-0.0173397	-0.511776	0.608808	0.820567	NS	NS	NS
P14_Sucrose degradation, heme synthesis (aerobic)	Pastry_Sweets	205	205	-0.0467602	0.641192	-0.0134582	0.100139	0.893225	0.979632	Pastry_Sweets	126	126	0.0864701	0.764689	-0.0693285	0.150841	0.646625	0.835224	Pastry_Sweets	223	223	0.04413	0.575045	0.0137426	0.100306	0.891153	0.984127	Pastry_Sweets	871	871	-0.0122277	0.629675	-0.0295222	0.0474913	0.534346	0.928625	Pastry_Sweets	99.7234	43.9503	99.3906	443.377	0.0381679	-0.0234728	-0.614987	0.538563	0.820567	NS	NS	NS
P18_Formaldehyde assimilation	Pastry_Sweets	205	205	-0.0467602	0.641192	-0.113621	0.120581	0.347191	0.81081	Pastry_Sweets	126	126	0.0864701	0.764689	-0.13768	0.161905	0.396808	0.698324	Pastry_Sweets	223	223	0.04413	0.575045	-0.193276	0.118219	0.103522	0.458453	Pastry_Sweets	871	871	-0.0122277	0.629675	0.0376292	0.0520416	0.469838	0.928625	Pastry_Sweets	68.777	38.1488	71.5524	369.232	0.0427292	-0.0237394	-0.555577	0.5785	0.820567	NS	NS	NS
P9_Enterobactin-, LPS-, quinone-synthesis (E.coli)	Vegetables_Fruit_Tea	205	205	-0.11222	0.77642	-0.151176	0.0815085	0.0651146	0.326719	Vegetables_Fruit_Tea	126	126	-0.000156026	0.675955	0.0524187	0.106637	0.623928	0.861231	Vegetables_Fruit_Tea	223	223	0.0418139	0.681131	-0.0281463	0.0803059	0.726312	0.992246	Vegetables_Fruit_Tea	871	871	0.0161285	0.690431	0.00341202	0.0363677	0.925274	0.934394	Vegetables_Fruit_Tea	150.52	87.9392	155.062	756.081	0.0294935	-0.0173364	-0.587805	0.556663	0.821741	NS	NS	NS
P16_Bifidobacterium shunt	Fish_Nuts	205	205	-0.135461	0.55016	0.189609	0.134521	0.160244	0.476394	Fish_Nuts	126	126	0.0141888	0.575752	0.312672	0.162972	0.0574155	0.254269	Fish_Nuts	223	223	0.0520077	0.656703	-0.0195422	0.102716	0.849288	0.940283	Fish_Nuts	871	871	0.0168252	0.570004	-0.0428334	0.0586925	0.465714	0.721856	Fish_Nuts	55.261	37.6507	94.7817	290.292	0.0457396	0.0166613	0.364264	0.715661	0.822912	NS	NS	NS
P7_Colanic acid building blocks synthesis	Fish_Nuts	205	205	-0.135461	0.55016	0.0924157	0.0963639	0.338708	0.52591	Fish_Nuts	126	126	0.0141888	0.575752	0.0690292	0.146089	0.637418	0.73185	Fish_Nuts	223	223	0.0520077	0.656703	0.0348408	0.0754765	0.644822	0.940283	Fish_Nuts	871	871	0.0168252	0.570004	-0.0223832	0.0488663	0.647032	0.841013	Fish_Nuts	107.689	46.8559	175.54	418.775	0.0365426	0.0132588	0.362832	0.71673	0.822912	NS	NS	NS
P29_DMK synthesis	Ready_meals	205	205	-0.0761095	0.668047	-0.00325705	0.0841984	0.969182	0.969182	Ready_meals	126	126	-0.0726462	0.963861	-0.0433533	0.0709201	0.542159	0.700289	Ready_meals	223	223	0.0593805	0.744316	0.0683022	0.0645285	0.291013	0.963447	Ready_meals	871	871	0.0135936	0.640699	0.0297475	0.0399134	0.456293	0.98222	Ready_meals	141.056	198.821	240.158	627.715	0.0287748	0.0215254	0.748065	0.454421	0.82865	NS	NS	NS
P30_Mannan degradation	Ready_meals	205	205	-0.0761095	0.668047	0.06151	0.146644	0.67534	0.969182	Ready_meals	126	126	-0.0726462	0.963861	0.141027	0.112737	0.213391	0.700289	Ready_meals	223	223	0.0593805	0.744316	-0.0196359	0.0912373	0.8298	0.977777	Ready_meals	871	871	0.0135936	0.640699	-0.0628861	0.0439716	0.153035	0.98222	Ready_meals	46.5017	78.6805	120.131	517.196	0.0362141	-0.0274448	-0.757849	0.448541	0.82865	NS	NS	NS
P6_Ferment. glutamate and pyruvate	Sugar_Sweets	205	205	0.184389	1.11711	0.0610978	0.0655645	0.352531	0.714635	Sugar_Sweets	126	126	0.0308263	0.62208	0.154135	0.148403	0.301069	0.928887	Sugar_Sweets	223	223	-0.0900997	0.489801	0.0239118	0.135138	0.859718	0.957766	Sugar_Sweets	871	871	-0.0242716	0.577625	-0.0310411	0.0506952	0.540494	0.918668	Sugar_Sweets	232.628	45.4059	54.7573	389.105	0.0372188	0.0144658	0.388669	0.697521	0.829435	NS	NS	NS
P5_Biotin and FA-synthesis (E. coli)	Sugar_Sweets	205	205	0.184389	1.11711	-0.00614627	0.0591356	0.917326	0.947903	Sugar_Sweets	126	126	0.0308263	0.62208	-0.0464879	0.13333	0.72795	0.928887	Sugar_Sweets	223	223	-0.0900997	0.489801	0.1043	0.130948	0.426612	0.874796	Sugar_Sweets	871	871	-0.0242716	0.577625	0.0262707	0.0538363	0.625693	0.918668	Sugar_Sweets	285.958	56.2525	58.3177	345.024	0.0366236	0.0144509	0.39458	0.693153	0.829435	NS	NS	NS
P20_Terpenoid synthesis via mevalonate	Sugar_Sweets	205	205	0.184389	1.11711	0.0553506	0.0645074	0.391897	0.714635	Sugar_Sweets	126	126	0.0308263	0.62208	-0.0945361	0.134	0.481872	0.928887	Sugar_Sweets	223	223	-0.0900997	0.489801	0.00411722	0.142335	0.97695	0.97695	Sugar_Sweets	871	871	-0.0242716	0.577625	0.0013887	0.0589213	0.981202	0.99461	Sugar_Sweets	240.315	55.6914	49.36	288.042	0.0397336	0.0136404	0.343297	0.731375	0.829435	NS	NS	NS
P14_Sucrose degradation, heme synthesis (aerobic)	Sugar_Sweets	205	205	0.184389	1.11711	0.0305543	0.0607692	0.615666	0.749186	Sugar_Sweets	126	126	0.0308263	0.62208	-0.250041	0.129981	0.0567634	0.879833	Sugar_Sweets	223	223	-0.0900997	0.489801	0.0623842	0.116419	0.592603	0.874796	Sugar_Sweets	871	871	-0.0242716	0.577625	-0.0125486	0.0489483	0.79773	0.918668	Sugar_Sweets	270.79	59.189	73.7827	417.373	0.0348974	-0.00872021	-0.249882	0.802679	0.829435	NS	NS	NS
P7_Colanic acid building blocks synthesis	Sugar_Sweets	205	205	0.184389	1.11711	0.0310994	0.0547135	0.570402	0.749186	Sugar_Sweets	126	126	0.0308263	0.62208	-0.0444349	0.136025	0.744488	0.928887	Sugar_Sweets	223	223	-0.0900997	0.489801	0.236107	0.110784	0.0341946	0.251414	Sugar_Sweets	871	871	-0.0242716	0.577625	-0.0961451	0.0513965	0.0617303	0.432189	Sugar_Sweets	334.049	54.046	81.4788	378.559	0.0343374	-0.0108139	-0.314932	0.752814	0.829435	NS	NS	NS
P22_Peptidoglycan synthesis IV (Enterococcus faecium)	Sugar_Sweets	205	205	0.184389	1.11711	-0.0715913	0.0733769	0.330415	0.714635	Sugar_Sweets	126	126	0.0308263	0.62208	-0.0562447	0.163173	0.730929	0.928887	Sugar_Sweets	223	223	-0.0900997	0.489801	-0.244604	0.145552	0.0942925	0.324785	Sugar_Sweets	871	871	-0.0242716	0.577625	0.0858123	0.063609	0.177671	0.637924	Sugar_Sweets	185.73	37.5579	47.2026	247.151	0.0439527	-0.0111012	-0.252571	0.8006	0.829435	NS	NS	NS
P20_Terpenoid synthesis via mevalonate	Fruit_Juice_Milk	205	205	0.0499406	0.971662	-0.0735177	0.0651811	0.26072	0.538822	Fruit_Juice_Milk	126	126	0.0470696	0.883709	0.123464	0.110724	0.267054	0.993163	Fruit_Juice_Milk	223	223	-0.0460608	0.585582	0.0836396	0.111161	0.452616	0.976547	Fruit_Juice_Milk	871	871	-0.00752221	0.66348	0.0419683	0.0498345	0.399935	0.940602	Fruit_Juice_Milk	235.373	81.5667	80.9268	402.661	0.0353437	0.0205291	0.580843	0.561346	0.830535	NS	NS	NS
P6_Ferment. glutamate and pyruvate	Fruit_Juice_Milk	205	205	0.0499406	0.971662	-0.020736	0.0664664	0.755385	0.927785	Fruit_Juice_Milk	126	126	0.0470696	0.883709	0.0579369	0.123443	0.639677	0.993163	Fruit_Juice_Milk	223	223	-0.0460608	0.585582	0.044803	0.105642	0.671911	0.976547	Fruit_Juice_Milk	871	871	-0.00752221	0.66348	0.0266534	0.0428943	0.534518	0.940602	Fruit_Juice_Milk	226.358	65.6248	89.604	543.5	0.0328782	0.019035	0.578953	0.562621	0.830535	NS	NS	NS
P2_Aerobic respiration, ECA-, LPS-, heme-synthesis	Wine_Alcohol	205	205	-0.27214	0.559289	-0.218704	0.0893073	0.0151954	0.0673133	Wine_Alcohol	126	126	-0.21131	0.583969	-0.0582091	0.0650985	0.373083	0.680328	Wine_Alcohol	223	223	-0.0117566	0.664384	0.0156581	0.0539288	0.771827	0.889056	Wine_Alcohol	871	871	0.0981863	0.783786	0.021406	0.0203767	0.293776	0.831533	Wine_Alcohol	125.379	235.97	343.842	2408.42	0.0179212	0.00506871	0.282832	0.777305	0.830913	NS	NS	NS
P21_Glycogen degradation	Vegetables_Fruit_Tea	205	205	-0.11222	0.77642	0.084306	0.11364	0.459042	0.711516	Vegetables_Fruit_Tea	126	126	-0.000156026	0.675955	0.222429	0.176975	0.211252	0.692696	Vegetables_Fruit_Tea	223	223	0.0418139	0.681131	0.0741984	0.0920316	0.420995	0.992246	Vegetables_Fruit_Tea	871	871	0.0161285	0.690431	-0.0171416	0.0437501	0.695298	0.82008	Vegetables_Fruit_Tea	77.4347	31.9283	118.066	522.447	0.0365178	0.017916	0.490609	0.623703	0.838453	NS	NS	NS
P10_FA and beta-oxidation	Vegetables_Fruit_Tea	205	205	-0.11222	0.77642	-0.0303803	0.0447277	0.497786	0.734827	Vegetables_Fruit_Tea	126	126	-0.000156026	0.675955	0.174622	0.0797502	0.0305202	0.692696	Vegetables_Fruit_Tea	223	223	0.0418139	0.681131	-0.000399651	0.041075	0.992246	0.992246	Vegetables_Fruit_Tea	871	871	0.0161285	0.690431	0.00726077	0.0198242	0.714263	0.82008	Vegetables_Fruit_Tea	499.858	157.23	592.714	2544.54	0.0162342	0.00804051	0.495281	0.620402	0.838453	NS	NS	NS
P12_Ferment. pyruvate and glycerol	Vegetables_Fruit_Tea	205	205	-0.11222	0.77642	0.13201	0.0539373	0.0152582	0.326719	Vegetables_Fruit_Tea	126	126	-0.000156026	0.675955	-0.0777751	0.0699093	0.26814	0.692696	Vegetables_Fruit_Tea	223	223	0.0418139	0.681131	-0.000569536	0.0452775	0.989975	0.992246	Vegetables_Fruit_Tea	871	871	0.0161285	0.690431	-0.00166967	0.0202773	0.934394	0.934394	Vegetables_Fruit_Tea	343.733	204.612	487.792	2432.09	0.0169803	0.00724398	0.42661	0.669664	0.838453	NS	NS	NS
P15_Methanogenesis	Vegetables_Fruit_Tea	205	205	-0.11222	0.77642	-0.0401264	0.0269123	0.137692	0.422595	Vegetables_Fruit_Tea	126	126	-0.000156026	0.675955	0.00696567	0.111621	0.950345	0.950345	Vegetables_Fruit_Tea	223	223	0.0418139	0.681131	0.00164109	0.093097	0.985952	0.992246	Vegetables_Fruit_Tea	871	871	0.0161285	0.690431	0.0790768	0.0469743	0.0926576	0.26327	Vegetables_Fruit_Tea	1380.69	80.2612	115.38	453.188	0.0221974	-0.00927171	-0.417693	0.676172	0.838453	NS	NS	NS
P28_UTP and CTP degradation	Fruit_Juice_Milk	205	205	0.0499406	0.971662	-0.024067	0.0853066	0.778142	0.927785	Fruit_Juice_Milk	126	126	0.0470696	0.883709	-0.0308892	0.119234	0.79603	0.993163	Fruit_Juice_Milk	223	223	-0.0460608	0.585582	0.0845453	0.110268	0.44408	0.976547	Fruit_Juice_Milk	871	871	-0.00752221	0.66348	0.0292863	0.0487702	0.548334	0.940602	Fruit_Juice_Milk	137.415	70.3396	82.2428	420.427	0.0375181	0.0194054	0.517227	0.604998	0.839478	NS	NS	NS
P23_L-glutamine synthesis	Fruit_Juice_Milk	205	205	0.0499406	0.971662	0.00928537	0.0784209	0.905867	0.981904	Fruit_Juice_Milk	126	126	0.0470696	0.883709	0.0183045	0.127536	0.886117	0.993163	Fruit_Juice_Milk	223	223	-0.0460608	0.585582	-0.178581	0.116983	0.128329	0.976547	Fruit_Juice_Milk	871	871	-0.00752221	0.66348	-0.00616909	0.0521361	0.905836	0.985397	Fruit_Juice_Milk	162.606	61.48	73.0721	367.894	0.0387768	-0.0190717	-0.491832	0.622838	0.839478	NS	NS	NS
P17_Polyamine synthesis	Pastry_Sweets	205	205	-0.0467602	0.641192	0.00467043	0.124203	0.970042	0.979632	Pastry_Sweets	126	126	0.0864701	0.764689	-0.107396	0.168752	0.525719	0.729755	Pastry_Sweets	223	223	0.04413	0.575045	0.041846	0.122576	0.733142	0.984127	Pastry_Sweets	871	871	-0.0122277	0.629675	-0.0339633	0.0628163	0.58887	0.928625	Pastry_Sweets	64.8245	35.1157	66.5559	253.428	0.0487994	-0.0221247	-0.45338	0.650275	0.839938	NS	NS	NS
P26_Thiamin synthesis	Ready_meals	205	205	-0.0761095	0.668047	0.0891584	0.11251	0.429042	0.886688	Ready_meals	126	126	-0.0726462	0.963861	0.156944	0.108073	0.149054	0.660096	Ready_meals	223	223	0.0593805	0.744316	0.0109744	0.086556	0.899224	0.977777	Ready_meals	871	871	0.0135936	0.640699	-0.0204932	0.0546334	0.707676	0.98222	Ready_meals	78.9985	85.6183	133.477	335.029	0.0397426	0.0238179	0.599305	0.548969	0.850902	NS	NS	NS
P14_Sucrose degradation, heme synthesis (aerobic)	Ready_meals	205	205	-0.0761095	0.668047	-0.073174	0.0910896	0.422749	0.886688	Ready_meals	126	126	-0.0726462	0.963861	-0.00654841	0.0886456	0.941235	0.97261	Ready_meals	223	223	0.0593805	0.744316	0.00194704	0.0698176	0.977777	0.977777	Ready_meals	871	871	0.0135936	0.640699	-0.0203389	0.0432428	0.638229	0.98222	Ready_meals	120.521	127.258	205.15	534.777	0.031819	-0.0203803	-0.640506	0.521844	0.850902	NS	NS	NS
P19_Biotin biosynthesis II (Bacillus subtilis)	Ready_meals	205	205	-0.0761095	0.668047	-0.116108	0.100526	0.249476	0.856228	Ready_meals	126	126	-0.0726462	0.963861	-0.0587565	0.0929223	0.528382	0.700289	Ready_meals	223	223	0.0593805	0.744316	0.062912	0.0909183	0.489701	0.963447	Ready_meals	871	871	0.0135936	0.640699	-0.0190071	0.0577513	0.742145	0.98222	Ready_meals	98.9554	115.814	120.975	299.831	0.0396658	-0.0257757	-0.649821	0.515808	0.850902	NS	NS	NS
P31_Anhydromuropeptides recycling	Ready_meals	205	205	-0.0761095	0.668047	-0.177656	0.0845135	0.0368017	0.570427	Ready_meals	126	126	-0.0726462	0.963861	0.0467387	0.0971635	0.63137	0.771351	Ready_meals	223	223	0.0593805	0.744316	0.0665415	0.090627	0.463598	0.963447	Ready_meals	871	871	0.0135936	0.640699	-0.00857217	0.0578023	0.882139	0.996983	Ready_meals	140.006	105.924	121.754	299.302	0.0387205	-0.021569	-0.557044	0.577498	0.852497	NS	NS	NS
P22_Peptidoglycan synthesis IV (Enterococcus faecium)	Vegetables_Fruit_Tea	205	205	-0.11222	0.77642	0.0201528	0.0923895	0.827552	0.946042	Vegetables_Fruit_Tea	126	126	-0.000156026	0.675955	-0.111313	0.157127	0.480053	0.861231	Vegetables_Fruit_Tea	223	223	0.0418139	0.681131	0.00743001	0.0971466	0.939106	0.992246	Vegetables_Fruit_Tea	871	871	0.0161285	0.690431	-0.0196946	0.0494245	0.690376	0.82008	Vegetables_Fruit_Tea	117.153	40.504	105.961	409.369	0.0385475	-0.0140013	-0.363223	0.716438	0.854215	NS	NS	NS
P18_Formaldehyde assimilation	Meat_Potatoes_Gravy	205	205	0.0092388	0.66643	0.00159318	0.1245	0.989803	0.989803	Meat_Potatoes_Gravy	126	126	0.0317397	0.612627	-0.0911413	0.169318	0.591378	0.678989	Meat_Potatoes_Gravy	223	223	-0.12186	0.546907	0.104708	0.132229	0.429301	0.745878	Meat_Potatoes_Gravy	871	871	0.0247565	0.537179	-0.0566209	0.0613348	0.35619	0.581151	Meat_Potatoes_Gravy	64.5156	34.8813	57.1933	265.819	0.0486557	-0.0287367	-0.590613	0.55478	0.859909	NS	NS	NS
P7_Colanic acid building blocks synthesis	Eggs_Alcoholic_drinks	205	205	-0.104303	0.43925	-0.15801	0.123981	0.203983	0.545366	Eggs_Alcoholic_drinks	126	126	-0.134042	0.302491	-0.24154	0.294848	0.414296	0.830735	Eggs_Alcoholic_drinks	223	223	-0.0546888	0.448173	-0.0205565	0.110665	0.852811	0.943039	Eggs_Alcoholic_drinks	871	871	0.0583724	0.606478	0.0151822	0.0492894	0.75814	0.975509	Eggs_Alcoholic_drinks	65.0567	11.5028	81.6551	411.617	0.0418916	-0.0148943	-0.355545	0.722182	0.861063	NS	NS	NS
P24_L-phenylalanine synthesis	Pastry_Cream	205	205	-0.0651555	0.556024	0.0510217	0.118036	0.666024	0.964115	Pastry_Cream	126	126	0.0592037	0.832987	-0.114957	0.137799	0.405804	0.984894	Pastry_Cream	223	223	-0.0509842	0.476141	-0.0315349	0.137353	0.818627	0.961045	Pastry_Cream	871	871	0.0200538	0.596495	0.183986	0.0613345	0.00277978	0.0861733	Pastry_Cream	71.7745	52.6634	53.0056	265.822	0.0474972	0.101167	2.12997	0.0331745	0.864555	NS	NS	NS
P14_Sucrose degradation, heme synthesis (aerobic)	Pastry_Cream	205	205	-0.0651555	0.556024	0.0798218	0.107668	0.459345	0.953657	Pastry_Cream	126	126	0.0592037	0.832987	-0.0737469	0.116373	0.527477	0.984894	Pastry_Cream	223	223	-0.0509842	0.476141	0.0696706	0.112047	0.534729	0.872811	Pastry_Cream	871	871	0.0200538	0.596495	0.0661308	0.0465349	0.155648	0.830153	Pastry_Cream	86.263	73.8401	79.6521	461.787	0.0377549	0.0534935	1.41686	0.156523	0.864555	NS	NS	NS
P19_Biotin biosynthesis II (Bacillus subtilis)	Pastry_Cream	205	205	-0.0651555	0.556024	-0.01126	0.119189	0.92483	0.964115	Pastry_Cream	126	126	0.0592037	0.832987	0.0497912	0.122308	0.684662	0.984894	Pastry_Cream	223	223	-0.0509842	0.476141	0.186702	0.145651	0.201267	0.623928	Pastry_Cream	871	871	0.0200538	0.596495	0.0445426	0.062198	0.474097	0.830153	Pastry_Cream	70.3927	66.8482	47.138	258.492	0.0475183	0.0515962	1.08582	0.27756	0.864555	NS	NS	NS
P28_UTP and CTP degradation	Pastry_Cream	205	205	-0.0651555	0.556024	0.0181651	0.149516	0.903423	0.964115	Pastry_Cream	126	126	0.0592037	0.832987	0.0415338	0.127045	0.744296	0.984894	Pastry_Cream	223	223	-0.0509842	0.476141	0.093289	0.135781	0.492781	0.872811	Pastry_Cream	871	871	0.0200538	0.596495	0.0511416	0.0548431	0.351335	0.830153	Pastry_Cream	44.7329	61.9567	54.2404	332.472	0.0450194	0.0515787	1.1457	0.251919	0.864555	NS	NS	NS
P25_L-tyrosine synthesis	Pastry_Cream	205	205	-0.0651555	0.556024	0.173267	0.127761	0.176579	0.953657	Pastry_Cream	126	126	0.0592037	0.832987	-0.151396	0.142925	0.291606	0.984894	Pastry_Cream	223	223	-0.0509842	0.476141	0.0196691	0.146559	0.893364	0.961045	Pastry_Cream	871	871	0.0200538	0.596495	0.0602825	0.059528	0.311499	0.830153	Pastry_Cream	61.2634	48.9534	46.5561	282.2	0.0477289	0.0481375	1.00856	0.313185	0.864555	NS	NS	NS
P7_Colanic acid building blocks synthesis	Pastry_Cream	205	205	-0.0651555	0.556024	-0.00889609	0.0970879	0.927085	0.964115	Pastry_Cream	126	126	0.0592037	0.832987	0.0148346	0.120196	0.901981	0.984894	Pastry_Cream	223	223	-0.0509842	0.476141	0.128232	0.107407	0.233826	0.658964	Pastry_Cream	871	871	0.0200538	0.596495	0.0446153	0.0489929	0.362734	0.830153	Pastry_Cream	106.089	69.2186	86.6833	416.614	0.0383877	0.0438929	1.14341	0.252867	0.864555	NS	NS	NS
P31_Anhydromuropeptides recycling	Pastry_Cream	205	205	-0.0651555	0.556024	0.0632431	0.100874	0.531411	0.964115	Pastry_Cream	126	126	0.0592037	0.832987	-0.0887933	0.127632	0.487963	0.984894	Pastry_Cream	223	223	-0.0509842	0.476141	0.259717	0.144683	0.0740341	0.542133	Pastry_Cream	871	871	0.0200538	0.596495	0.0256582	0.0622621	0.680369	0.942779	Pastry_Cream	98.2737	61.3876	47.7709	257.96	0.0463544	0.0425233	0.917353	0.358958	0.864555	NS	NS	NS
P9_Enterobactin-, LPS-, quinone-synthesis (E.coli)	Pastry_Cream	205	205	-0.0651555	0.556024	0.0797425	0.115893	0.49221	0.953657	Pastry_Cream	126	126	0.0592037	0.832987	-0.0518505	0.0976445	0.596391	0.984894	Pastry_Cream	223	223	-0.0509842	0.476141	0.127123	0.116291	0.275544	0.711821	Pastry_Cream	871	871	0.0200538	0.596495	0.0437006	0.0445657	0.32707	0.830153	Pastry_Cream	74.4536	104.883	73.9444	503.499	0.0363509	0.0421551	1.15967	0.246183	0.864555	NS	NS	NS
P13_Ferment. to butanoate	Pastry_Cream	205	205	-0.0651555	0.556024	-0.0162866	0.0890929	0.855137	0.964115	Pastry_Cream	126	126	0.0592037	0.832987	0.116631	0.0978187	0.235488	0.984894	Pastry_Cream	223	223	-0.0509842	0.476141	0.178432	0.102195	0.0822283	0.542133	Pastry_Cream	871	871	0.0200538	0.596495	-0.000309306	0.0416716	0.99408	0.99408	Pastry_Cream	125.984	104.51	95.7498	575.863	0.0332944	0.0299787	0.900412	0.367901	0.864555	NS	NS	NS
P2_Aerobic respiration, ECA-, LPS-, heme-synthesis	Pastry_Cream	205	205	-0.0651555	0.556024	0.0490693	0.0920706	0.594661	0.964115	Pastry_Cream	126	126	0.0592037	0.832987	-0.00430904	0.055092	0.937791	0.984894	Pastry_Cream	223	223	-0.0509842	0.476141	0.0526963	0.0787516	0.504114	0.872811	Pastry_Cream	871	871	0.0200538	0.596495	0.0267158	0.0286473	0.351299	0.830153	Pastry_Cream	117.966	329.476	161.243	1218.52	0.0233941	0.0248573	1.06255	0.287988	0.864555	NS	NS	NS
P15_Methanogenesis	Pastry_Cream	205	205	-0.0651555	0.556024	-0.0508526	0.0399596	0.204784	0.953657	Pastry_Cream	126	126	0.0592037	0.832987	0.0705959	0.102024	0.490302	0.984894	Pastry_Cream	223	223	-0.0509842	0.476141	0.189983	0.13453	0.159324	0.623928	Pastry_Cream	871	871	0.0200538	0.596495	-0.0399396	0.0576733	0.4888	0.830153	Pastry_Cream	626.263	96.072	55.2538	300.643	0.030454	-0.0246469	-0.809317	0.418333	0.864555	NS	NS	NS
P8_Creatinine degradation I	Pastry_Cream	205	205	-0.0651555	0.556024	-0.00940375	0.111738	0.933015	0.964115	Pastry_Cream	126	126	0.0592037	0.832987	-0.0173716	0.119075	0.884255	0.984894	Pastry_Cream	223	223	-0.0509842	0.476141	-0.12761	0.14601	0.383097	0.848286	Pastry_Cream	871	871	0.0200538	0.596495	-0.0385536	0.0620419	0.534492	0.830153	Pastry_Cream	80.094	70.5271	46.9066	259.795	0.0467615	-0.0393161	-0.840778	0.400473	0.864555	NS	NS	NS
P3_AA-synthesis	Pastry_Cream	205	205	-0.0651555	0.556024	-0.0484596	0.0985531	0.623466	0.964115	Pastry_Cream	126	126	0.0592037	0.832987	0.00169504	0.0893356	0.984894	0.984894	Pastry_Cream	223	223	-0.0509842	0.476141	-0.148351	0.107525	0.169104	0.623928	Pastry_Cream	871	871	0.0200538	0.596495	-0.0310873	0.0411342	0.450002	0.830153	Pastry_Cream	102.958	125.3	86.4928	591.009	0.0332272	-0.0397248	-1.19555	0.231872	0.864555	NS	NS	NS
P27_dTTP synthesis	Pastry_Cream	205	205	-0.0651555	0.556024	-0.000955618	0.144979	0.994747	0.994747	Pastry_Cream	126	126	0.0592037	0.832987	0.0213098	0.138559	0.878029	0.984894	Pastry_Cream	223	223	-0.0509842	0.476141	0.0025035	0.14133	0.985883	0.985883	Pastry_Cream	871	871	0.0200538	0.596495	-0.0787823	0.0585084	0.17849	0.830153	Pastry_Cream	47.5763	52.0869	50.0648	292.121	0.0475733	-0.0493927	-1.03825	0.299156	0.864555	NS	NS	NS
P1_AA-synthesis and starch degradation	Pastry_Cream	205	205	-0.0651555	0.556024	-0.0981624	0.132445	0.459477	0.953657	Pastry_Cream	126	126	0.0592037	0.832987	0.00711353	0.129053	0.956134	0.984894	Pastry_Cream	223	223	-0.0509842	0.476141	-0.24861	0.14481	0.0874408	0.542133	Pastry_Cream	871	871	0.0200538	0.596495	-0.0414518	0.0557998	0.457764	0.830153	Pastry_Cream	57.0072	60.0429	47.6876	321.17	0.0453652	-0.0624348	-1.37627	0.168738	0.864555	NS	NS	NS
P26_Thiamin synthesis	Sugar_Sweets	205	205	0.184389	1.11711	0.102847	0.0747491	0.170401	0.636875	Sugar_Sweets	126	126	0.0308263	0.62208	-0.0206575	0.162285	0.898923	0.928887	Sugar_Sweets	223	223	-0.0900997	0.489801	0.0606333	0.144372	0.674915	0.909668	Sugar_Sweets	871	871	-0.0242716	0.577625	-0.0636272	0.0618035	0.303528	0.855398	Sugar_Sweets	178.973	37.9703	47.9774	261.803	0.0435721	0.00735434	0.168785	0.865965	0.865965	NS	NS	NS
P27_dTTP synthesis	Fish_Nuts	205	205	-0.135461	0.55016	0.177272	0.143678	0.218728	0.476394	Fish_Nuts	126	126	0.0141888	0.575752	0.110066	0.168272	0.514302	0.637735	Fish_Nuts	223	223	0.0520077	0.656703	-0.0411324	0.0989993	0.6782	0.940283	Fish_Nuts	871	871	0.0168252	0.570004	-0.00775559	0.0583969	0.894376	0.956057	Fish_Nuts	48.4415	35.3165	102.032	293.238	0.0456898	0.0125325	0.274295	0.783858	0.867843	NS	NS	NS
P23_L-glutamine synthesis	Meat_Potatoes_Gravy	205	205	0.0092388	0.66643	-0.0829849	0.131372	0.528322	0.989803	Meat_Potatoes_Gravy	126	126	0.0317397	0.612627	-0.110146	0.183498	0.549466	0.678307	Meat_Potatoes_Gravy	223	223	-0.12186	0.546907	0.230959	0.143317	0.108519	0.602171	Meat_Potatoes_Gravy	871	871	0.0247565	0.537179	0.0299196	0.0704785	0.671292	0.832927	Meat_Potatoes_Gravy	57.9422	29.6987	48.686	201.32	0.0544213	0.027213	0.500043	0.617045	0.869473	NS	NS	NS
P11_Mixed acid fermentation	Meat_Potatoes_Gravy	205	205	0.0092388	0.66643	-0.0976608	0.138809	0.482527	0.989803	Meat_Potatoes_Gravy	126	126	0.0317397	0.612627	-0.113747	0.199121	0.568903	0.678307	Meat_Potatoes_Gravy	223	223	-0.12186	0.546907	-0.00802408	0.14107	0.954693	0.985137	Meat_Potatoes_Gravy	871	871	0.0247565	0.537179	-0.00823813	0.0653415	0.899699	0.961748	Meat_Potatoes_Gravy	51.8998	25.2211	50.2494	234.219	0.0525887	-0.0284028	-0.540093	0.589133	0.869473	NS	NS	NS
P21_Glycogen degradation	Fish_Nuts	205	205	-0.135461	0.55016	0.0748461	0.159692	0.639803	0.742736	Fish_Nuts	126	126	0.0141888	0.575752	0.380515	0.195395	0.0538208	0.254269	Fish_Nuts	223	223	0.0520077	0.656703	0.0010127	0.093762	0.991392	0.991392	Fish_Nuts	871	871	0.0168252	0.570004	-0.0247288	0.0534821	0.643928	0.841013	Fish_Nuts	39.2135	26.1923	113.749	349.61	0.043488	0.00826701	0.190099	0.849232	0.877539	NS	NS	NS
P13_Ferment. to butanoate	Fish_Nuts	205	205	-0.135461	0.55016	-0.102812	0.088338	0.245881	0.476394	Fish_Nuts	126	126	0.0141888	0.575752	0.00696009	0.119696	0.953727	0.953727	Fish_Nuts	223	223	0.0520077	0.656703	0.0747228	0.0719373	0.30009	0.884647	Fish_Nuts	871	871	0.0168252	0.570004	-0.0134863	0.0415465	0.745557	0.888933	Fish_Nuts	128.146	69.798	193.238	579.336	0.0320995	-0.0062471	-0.194617	0.845693	0.877539	NS	NS	NS
P30_Mannan degradation	Wine_Alcohol	205	205	-0.27214	0.559289	0.552866	0.165996	0.00103281	0.0312913	Wine_Alcohol	126	126	-0.21131	0.583969	0.197077	0.175031	0.262432	0.670977	Wine_Alcohol	223	223	-0.0117566	0.664384	-0.122475	0.0999405	0.221722	0.889056	Wine_Alcohol	871	871	0.0981863	0.783786	-0.021863	0.0337291	0.517031	0.838228	Wine_Alcohol	36.2916	32.6415	100.119	879.003	0.0308893	-0.00475405	-0.153906	0.877684	0.877684	NS	NS	NS
P26_Thiamin synthesis	Wine_Alcohol	205	205	-0.27214	0.559289	-0.226432	0.13002	0.0831367	0.151602	Wine_Alcohol	126	126	-0.21131	0.583969	-0.186784	0.168189	0.268976	0.670977	Wine_Alcohol	223	223	-0.0117566	0.664384	0.02765	0.0951151	0.771558	0.889056	Wine_Alcohol	871	871	0.0981863	0.783786	0.0206585	0.0418656	0.621821	0.917926	Wine_Alcohol	59.1538	35.3514	110.535	570.538	0.0359077	-0.00664619	-0.185091	0.853158	0.877684	NS	NS	NS
P29_DMK synthesis	Pastry_Cream	205	205	-0.0651555	0.556024	-0.0916119	0.0992872	0.357283	0.953657	Pastry_Cream	126	126	0.0592037	0.832987	0.0927177	0.0930179	0.32088	0.984894	Pastry_Cream	223	223	-0.0509842	0.476141	0.227757	0.102762	0.0277056	0.542133	Pastry_Cream	871	871	0.0200538	0.596495	-0.00206893	0.0430104	0.961645	0.9937	Pastry_Cream	101.441	115.576	94.6971	540.57	0.0342537	0.0256631	0.749205	0.453734	0.879109	NS	NS	NS
P26_Thiamin synthesis	Fruit_Juice_Milk	205	205	0.0499406	0.971662	0.0435769	0.0759271	0.566663	0.731939	Fruit_Juice_Milk	126	126	0.0470696	0.883709	-0.0787778	0.134327	0.558666	0.993163	Fruit_Juice_Milk	223	223	-0.0460608	0.585582	-0.0238784	0.112933	0.832743	0.976547	Fruit_Juice_Milk	871	871	-0.00752221	0.66348	0.0255795	0.0523185	0.625023	0.940602	Fruit_Juice_Milk	173.463	55.4209	78.4082	365.334	0.0385579	0.015857	0.411252	0.680888	0.87948	NS	NS	NS
P20_Terpenoid synthesis via mevalonate	Coffee_milk_Soup	205	205	-0.0190486	0.599621	0.146933	0.111556	0.189314	0.938852	Coffee_milk_Soup	126	126	0.00261508	0.755444	0.00964252	0.110825	0.930811	0.961838	Coffee_milk_Soup	223	223	-0.00397076	0.684592	-0.0414874	0.0923363	0.653658	0.834615	Coffee_milk_Soup	871	871	0.00528062	0.524601	0.0536389	0.0605927	0.376274	0.686147	Coffee_milk_Soup	80.3549	81.4184	117.288	272.37	0.0425848	0.0405046	0.951152	0.341527	0.882279	NS	NS	NS
P17_Polyamine synthesis	Ready_meals	205	205	-0.0761095	0.668047	0.0942968	0.11296	0.404841	0.886688	Ready_meals	126	126	-0.0726462	0.963861	-0.000989909	0.0992537	0.992059	0.992059	Ready_meals	223	223	0.0593805	0.744316	0.0885939	0.0851258	0.299154	0.963447	Ready_meals	871	871	0.0135936	0.640699	-0.0274216	0.0571935	0.631737	0.98222	Ready_meals	78.3705	101.509	137.999	305.708	0.0400453	0.0178524	0.445804	0.655739	0.883821	NS	NS	NS
P25_L-tyrosine synthesis	Ready_meals	205	205	-0.0761095	0.668047	-0.0188663	0.108605	0.862266	0.969182	Ready_meals	126	126	-0.0726462	0.963861	-0.16894	0.108104	0.120745	0.623848	Ready_meals	223	223	0.0593805	0.744316	0.0863065	0.0910563	0.344267	0.963447	Ready_meals	871	871	0.0135936	0.640699	-0.0185892	0.0552884	0.736785	0.98222	Ready_meals	84.7815	85.5689	120.609	327.139	0.0402227	-0.0189733	-0.471707	0.637136	0.883821	NS	NS	NS
P21_Glycogen degradation	Cheese_Butter	205	205	-0.0931494	0.425837	0.27373	0.203128	0.179328	0.463264	Cheese_Butter	126	126	-0.00880917	0.675371	-0.110634	0.168875	0.513643	0.88394	Cheese_Butter	223	223	-0.0538434	0.563146	0.0265833	0.111534	0.811841	0.932114	Cheese_Butter	871	871	0.0356952	0.679706	0.00967829	0.04529	0.830834	0.984854	Cheese_Butter	24.2359	35.0645	80.3866	487.524	0.0399294	0.015322	0.383726	0.701181	0.888906	NS	NS	NS
P13_Ferment. to butanoate	Cheese_Butter	205	205	-0.0931494	0.425837	0.198487	0.112321	0.0787367	0.368923	Cheese_Butter	126	126	-0.00880917	0.675371	-0.0259048	0.102009	0.799973	0.88394	Cheese_Butter	223	223	-0.0538434	0.563146	0.0693863	0.085667	0.418854	0.932114	Cheese_Butter	871	871	0.0356952	0.679706	-0.0459505	0.0351467	0.191426	0.539473	Cheese_Butter	79.2644	96.0991	136.261	809.528	0.0298653	-0.0129331	-0.433049	0.664979	0.888906	NS	NS	NS
P28_UTP and CTP degradation	Cheese_Butter	205	205	-0.0931494	0.425837	-0.0498509	0.189928	0.793229	0.92533	Cheese_Butter	126	126	-0.00880917	0.675371	-0.0448849	0.13174	0.733919	0.88394	Cheese_Butter	223	223	-0.0538434	0.563146	0.0524301	0.113267	0.643909	0.932114	Cheese_Butter	871	871	0.0356952	0.679706	-0.0197745	0.0463198	0.669549	0.902435	Cheese_Butter	27.7217	57.6191	77.9453	466.086	0.0398608	-0.0144559	-0.362659	0.71686	0.888906	NS	NS	NS
P31_Anhydromuropeptides recycling	Cheese_Butter	205	205	-0.0931494	0.425837	-0.0234568	0.128273	0.855089	0.946706	Cheese_Butter	126	126	-0.00880917	0.675371	-0.0273166	0.132597	0.837131	0.88394	Cheese_Butter	223	223	-0.0538434	0.563146	0.0437937	0.121478	0.718819	0.932114	Cheese_Butter	871	871	0.0356952	0.679706	-0.0234947	0.052564	0.655007	0.902435	Cheese_Butter	60.7755	56.8762	67.7648	361.928	0.0427434	-0.0155569	-0.36396	0.715888	0.888906	NS	NS	NS
P19_Biotin biosynthesis II (Bacillus subtilis)	Cheese_Butter	205	205	-0.0931494	0.425837	0.040699	0.151401	0.78835	0.92533	Cheese_Butter	126	126	-0.00880917	0.675371	-0.201246	0.125584	0.111678	0.865508	Cheese_Butter	223	223	-0.0538434	0.563146	-0.0294589	0.121872	0.809225	0.932114	Cheese_Butter	871	871	0.0356952	0.679706	0.0511358	0.0524975	0.330299	0.569218	Cheese_Butter	43.6256	63.4061	67.3277	362.846	0.0431449	0.0103988	0.241021	0.809539	0.896275	NS	NS	NS
P30_Mannan degradation	Cheese_Butter	205	205	-0.0931494	0.425837	0.129599	0.220068	0.556594	0.807969	Cheese_Butter	126	126	-0.00880917	0.675371	0.141491	0.154188	0.360642	0.88394	Cheese_Butter	223	223	-0.0538434	0.563146	-0.0316332	0.122175	0.795945	0.932114	Cheese_Butter	871	871	0.0356952	0.679706	0.0017561	0.0400381	0.965026	0.995317	Cheese_Butter	20.6484	42.0627	66.9937	623.812	0.0364295	0.010091	0.277001	0.781779	0.896275	NS	NS	NS
P4_Ferment. acetylene to acetate	Cheese_Butter	205	205	-0.0931494	0.425837	0.117178	0.0744199	0.116948	0.371521	Cheese_Butter	126	126	-0.00880917	0.675371	-0.0482203	0.0601529	0.424352	0.88394	Cheese_Butter	223	223	-0.0538434	0.563146	0.0386932	0.0510036	0.448897	0.932114	Cheese_Butter	871	871	0.0356952	0.679706	-0.0155733	0.0204837	0.447298	0.693311	Cheese_Butter	180.56	276.368	384.413	2383.32	0.01761	-0.00446892	-0.253772	0.799672	0.896275	NS	NS	NS
P4_Ferment. acetylene to acetate	Pastry_Cream	205	205	-0.0651555	0.556024	-0.0437561	0.058859	0.458113	0.953657	Pastry_Cream	126	126	0.0592037	0.832987	-0.0538166	0.057954	0.354956	0.984894	Pastry_Cream	223	223	-0.0509842	0.476141	-0.00634699	0.0612483	0.917561	0.961045	Pastry_Cream	871	871	0.0200538	0.596495	0.0371777	0.0242408	0.125475	0.830153	Pastry_Cream	288.652	297.737	266.57	1701.79	0.0197845	0.0128871	0.651371	0.514807	0.897393	NS	NS	NS
P18_Formaldehyde assimilation	Pastry_Cream	205	205	-0.0651555	0.556024	-0.109638	0.129878	0.399592	0.953657	Pastry_Cream	126	126	0.0592037	0.832987	0.0841141	0.125149	0.502804	0.984894	Pastry_Cream	223	223	-0.0509842	0.476141	-0.0162394	0.132976	0.902915	0.961045	Pastry_Cream	871	871	0.0200538	0.596495	-0.0316359	0.0510458	0.535582	0.830153	Pastry_Cream	59.2831	63.8479	56.5527	383.777	0.0421277	-0.0251813	-0.597738	0.550015	0.897393	NS	NS	NS
P16_Bifidobacterium shunt	Pastry_Cream	205	205	-0.0651555	0.556024	-0.243857	0.134792	0.0719393	0.953657	Pastry_Cream	126	126	0.0592037	0.832987	0.107699	0.135654	0.428807	0.984894	Pastry_Cream	223	223	-0.0509842	0.476141	0.191218	0.146014	0.19172	0.623928	Pastry_Cream	871	871	0.0200538	0.596495	-0.050582	0.0588586	0.390368	0.830153	Pastry_Cream	55.0391	54.3422	46.9043	288.656	0.0474077	-0.029669	-0.625826	0.531429	0.897393	NS	NS	NS
P7_Colanic acid building blocks synthesis	Fruit_Juice_Milk	205	205	0.0499406	0.971662	-0.000829145	0.0554039	0.988075	0.988075	Fruit_Juice_Milk	126	126	0.0470696	0.883709	0.0441383	0.112723	0.696074	0.993163	Fruit_Juice_Milk	223	223	-0.0460608	0.585582	0.00532323	0.0875343	0.951564	0.976547	Fruit_Juice_Milk	871	871	-0.00752221	0.66348	-0.0291742	0.0435646	0.503243	0.940602	Fruit_Juice_Milk	325.776	78.7005	130.51	526.905	0.0306874	-0.010805	-0.352098	0.724765	0.898709	NS	NS	NS
P19_Biotin biosynthesis II (Bacillus subtilis)	Dairy_Cereals	205	205	-0.161259	0.558239	-0.0546011	0.122793	0.657049	0.856475	Dairy_Cereals	126	126	-0.0521211	0.621192	-0.0667229	0.136486	0.625832	0.918322	Dairy_Cereals	223	223	-0.0111794	0.671357	-0.211562	0.104987	0.0451258	0.846927	Dairy_Cereals	871	871	0.0462207	0.622802	-0.0142396	0.0579122	0.805831	0.957321	Dairy_Cereals	66.3211	53.6813	90.7247	298.167	0.0443288	-0.0602142	-1.35835	0.174351	0.900816	NS	NS	NS
P2_Aerobic respiration, ECA-, LPS-, heme-synthesis	Vegetables_Fruit_Tea	205	205	-0.11222	0.77642	-0.112405	0.0647922	0.0843146	0.326719	Vegetables_Fruit_Tea	126	126	-0.000156026	0.675955	0.0451622	0.0601396	0.4542	0.861231	Vegetables_Fruit_Tea	223	223	0.0418139	0.681131	-0.023928	0.0542804	0.65978	0.992246	Vegetables_Fruit_Tea	871	871	0.0161285	0.690431	0.0045193	0.0233759	0.846745	0.905141	Vegetables_Fruit_Tea	238.207	276.49	339.402	1830.05	0.0193018	-0.0052678	-0.272918	0.784916	0.9012	NS	NS	NS
P20_Terpenoid synthesis via mevalonate	Vegetables_Fruit_Tea	205	205	-0.11222	0.77642	0.0620544	0.0810684	0.444906	0.711516	Vegetables_Fruit_Tea	126	126	-0.000156026	0.675955	-0.0152599	0.129501	0.906394	0.944161	Vegetables_Fruit_Tea	223	223	0.0418139	0.681131	0.0817858	0.0942257	0.386365	0.992246	Vegetables_Fruit_Tea	871	871	0.0161285	0.690431	-0.0257929	0.0457298	0.572881	0.808649	Vegetables_Fruit_Tea	152.159	59.6287	112.632	478.19	0.0352978	0.00674047	0.19096	0.848557	0.909661	NS	NS	NS
P18_Formaldehyde assimilation	Vegetables_Fruit_Tea	205	205	-0.11222	0.77642	0.0761908	0.092027	0.408709	0.711516	Vegetables_Fruit_Tea	126	126	-0.000156026	0.675955	0.155563	0.13617	0.255555	0.692696	Vegetables_Fruit_Tea	223	223	0.0418139	0.681131	-0.0384721	0.0915676	0.674792	0.992246	Vegetables_Fruit_Tea	871	871	0.0161285	0.690431	-0.0125922	0.0416399	0.762414	0.844102	Vegetables_Fruit_Tea	118.078	53.9308	119.266	576.741	0.0339419	0.00637691	0.187877	0.850973	0.909661	NS	NS	NS
P11_Mixed acid fermentation	Coffee_milk_Soup	205	205	-0.0190486	0.599621	0.0272717	0.142003	0.847899	0.985898	Coffee_milk_Soup	126	126	0.00261508	0.755444	-0.0220203	0.137791	0.8733	0.961838	Coffee_milk_Soup	223	223	-0.00397076	0.684592	-0.0845518	0.0953388	0.376138	0.834615	Coffee_milk_Soup	871	871	0.00528062	0.524601	0.0849376	0.0586972	0.148246	0.574454	Coffee_milk_Soup	49.5909	52.6697	110.017	290.245	0.0446089	0.0309303	0.693366	0.48808	0.91119	NS	NS	NS
P9_Enterobactin-, LPS-, quinone-synthesis (E.coli)	Coffee_milk_Soup	205	205	-0.0190486	0.599621	0.095665	0.113249	0.399277	0.938852	Coffee_milk_Soup	126	126	0.00261508	0.755444	0.180334	0.0898527	0.0469976	0.516247	Coffee_milk_Soup	223	223	-0.00397076	0.684592	0.107031	0.0782817	0.172959	0.804693	Coffee_milk_Soup	871	871	0.00528062	0.524601	-0.057367	0.0481614	0.233925	0.671999	Coffee_milk_Soup	77.9701	123.862	163.185	431.123	0.035441	0.028298	0.798454	0.424607	0.91119	NS	NS	NS
P18_Formaldehyde assimilation	Coffee_milk_Soup	205	205	-0.0190486	0.599621	0.0444884	0.12718	0.726853	0.938852	Coffee_milk_Soup	126	126	0.00261508	0.755444	-0.0999564	0.116806	0.393843	0.770345	Coffee_milk_Soup	223	223	-0.00397076	0.684592	-0.0567637	0.0895715	0.526927	0.834615	Coffee_milk_Soup	871	871	0.00528062	0.524601	0.0839095	0.0551174	0.12828	0.574454	Coffee_milk_Soup	61.8252	73.2944	124.641	329.171	0.0412067	0.0271165	0.658061	0.510499	0.91119	NS	NS	NS
P14_Sucrose degradation, heme synthesis (aerobic)	Coffee_milk_Soup	205	205	-0.0190486	0.599621	0.0409149	0.105381	0.698241	0.938852	Coffee_milk_Soup	126	126	0.00261508	0.755444	0.0919588	0.1086	0.39881	0.770345	Coffee_milk_Soup	223	223	-0.00397076	0.684592	0.038274	0.0755639	0.613012	0.834615	Coffee_milk_Soup	871	871	0.00528062	0.524601	-0.00862294	0.0503607	0.864088	0.92368	Coffee_milk_Soup	90.0483	84.7896	175.134	394.291	0.0366553	0.0198647	0.541934	0.587864	0.91119	NS	NS	NS
P12_Ferment. pyruvate and glycerol	Coffee_milk_Soup	205	205	-0.0190486	0.599621	-0.027432	0.0747548	0.714041	0.938852	Coffee_milk_Soup	126	126	0.00261508	0.755444	-0.0844188	0.0596379	0.159505	0.618084	Coffee_milk_Soup	223	223	-0.00397076	0.684592	-0.0309535	0.0442636	0.485115	0.834615	Coffee_milk_Soup	871	871	0.00528062	0.524601	0.0577817	0.0268048	0.0313871	0.486499	Coffee_milk_Soup	178.946	281.161	510.395	1391.79	0.0205747	0.0152298	0.740221	0.459166	0.91119	NS	NS	NS
P10_FA and beta-oxidation	Coffee_milk_Soup	205	205	-0.0190486	0.599621	0.090767	0.0608245	0.137218	0.938852	Coffee_milk_Soup	126	126	0.00261508	0.755444	0.0327376	0.0690723	0.636403	0.961396	Coffee_milk_Soup	223	223	-0.00397076	0.684592	0.0393171	0.0400662	0.327541	0.834615	Coffee_milk_Soup	871	871	0.00528062	0.524601	-0.0195441	0.0262901	0.457441	0.694899	Coffee_milk_Soup	270.298	209.6	622.937	1446.83	0.0198043	0.0108293	0.546815	0.584506	0.91119	NS	NS	NS
P28_UTP and CTP degradation	Coffee_milk_Soup	205	205	-0.0190486	0.599621	-0.0149055	0.146195	0.918894	0.985898	Coffee_milk_Soup	126	126	0.00261508	0.755444	-0.143375	0.118043	0.226903	0.66473	Coffee_milk_Soup	223	223	-0.00397076	0.684592	-0.122279	0.0912651	0.181705	0.804693	Coffee_milk_Soup	871	871	0.00528062	0.524601	0.0450121	0.0592938	0.447978	0.694899	Coffee_milk_Soup	46.7883	71.7666	120.058	284.434	0.043725	-0.0245953	-0.5625	0.573775	0.91119	NS	NS	NS
P26_Thiamin synthesis	Coffee_milk_Soup	205	205	-0.0190486	0.599621	-0.0530102	0.130151	0.684228	0.938852	Coffee_milk_Soup	126	126	0.00261508	0.755444	0.0568035	0.133853	0.672055	0.961396	Coffee_milk_Soup	223	223	-0.00397076	0.684592	0.0477107	0.0936828	0.611074	0.834615	Coffee_milk_Soup	871	871	0.00528062	0.524601	-0.0955142	0.0635414	0.133158	0.574454	Coffee_milk_Soup	59.0341	55.8137	113.941	247.677	0.0458125	-0.0381548	-0.832847	0.404931	0.91119	NS	NS	NS
P28_UTP and CTP degradation	Meat_Potatoes_Gravy	205	205	0.0092388	0.66643	-0.137354	0.142742	0.337091	0.989803	Meat_Potatoes_Gravy	126	126	0.0317397	0.612627	-0.0860507	0.171664	0.617097	0.683214	Meat_Potatoes_Gravy	223	223	-0.12186	0.546907	0.157691	0.134932	0.243816	0.602171	Meat_Potatoes_Gravy	871	871	0.0247565	0.537179	0.0356731	0.0659373	0.588637	0.829442	Meat_Potatoes_Gravy	49.079	33.9345	54.9253	230.005	0.0521326	0.0195817	0.375613	0.707205	0.913473	NS	NS	NS
P17_Polyamine synthesis	Meat_Potatoes_Gravy	205	205	0.0092388	0.66643	0.00559489	0.127954	0.965167	0.989803	Meat_Potatoes_Gravy	126	126	0.0317397	0.612627	0.251285	0.174962	0.153539	0.365303	Meat_Potatoes_Gravy	223	223	-0.12186	0.546907	-0.00254573	0.136499	0.985137	0.985137	Meat_Potatoes_Gravy	871	871	0.0247565	0.537179	-0.0854286	0.0740033	0.248659	0.48731	Meat_Potatoes_Gravy	61.0794	32.6673	53.6709	182.599	0.0550468	-0.0217725	-0.395526	0.692455	0.913473	NS	NS	NS
P7_Colanic acid building blocks synthesis	Sweetened_tea_yoghurtdrink	205	205	0.111425	1.12755	0.00149554	0.0496047	0.975978	0.975978	Sweetened_tea_yoghurtdrink	126	126	0.0674218	0.540567	-0.155831	0.157955	0.325844	0.631323	Sweetened_tea_yoghurtdrink	223	223	0.00250442	0.480442	0.0443852	0.103363	0.668051	0.99476	Sweetened_tea_yoghurtdrink	871	871	-0.0373747	0.434722	0.0224536	0.0634952	0.723705	0.871605	Sweetened_tea_yoghurtdrink	406.4	40.0807	93.5984	248.038	0.0356209	0.00518408	0.145535	0.884289	0.913765	NS	NS	NS
P11_Mixed acid fermentation	Fish_Nuts	205	205	-0.135461	0.55016	0.0867843	0.14436	0.548413	0.680033	Fish_Nuts	126	126	0.0141888	0.575752	0.139845	0.178948	0.436057	0.596453	Fish_Nuts	223	223	0.0520077	0.656703	-0.169285	0.0986083	0.0874539	0.634812	Fish_Nuts	871	871	0.0168252	0.570004	0.033101	0.0541946	0.541506	0.799366	Fish_Nuts	47.9852	31.2283	102.843	340.477	0.0437465	0.00457752	0.104637	0.916663	0.916663	NS	NS	NS
P7_Colanic acid building blocks synthesis	Meat	205	205	0.0153272	0.592254	-0.00325511	0.0922627	0.971891	0.971891	Meat	126	126	0.00509592	0.600788	-0.096349	0.141802	0.498154	0.928545	Meat	223	223	-0.0138947	0.560121	-0.102667	0.0910204	0.260584	0.538541	Meat	871	871	-0.0016754	0.624155	0.109791	0.0469566	0.0196071	0.589035	Meat	117.476	49.7318	120.704	453.53	0.036725	0.0434657	1.18355	0.236593	0.916798	NS	NS	NS
P15_Methanogenesis	Meat	205	205	0.0153272	0.592254	-0.00923216	0.0360313	0.798066	0.907547	Meat	126	126	0.00509592	0.600788	-0.013042	0.120822	0.91422	0.944694	Meat	223	223	-0.0138947	0.560121	-0.130234	0.114146	0.255151	0.538541	Meat	871	871	-0.0016754	0.624155	-0.074124	0.0553821	0.181114	0.670365	Meat	770.264	68.5029	76.7499	326.033	0.0283804	-0.0339632	-1.19671	0.231418	0.916798	NS	NS	NS
P7_Colanic acid building blocks synthesis	Coffee_milk_Soup	205	205	-0.0190486	0.599621	0.0708623	0.0947994	0.455646	0.938852	Coffee_milk_Soup	126	126	0.00261508	0.755444	0.0731115	0.112122	0.515603	0.887982	Coffee_milk_Soup	223	223	-0.00397076	0.684592	0.0112888	0.0726462	0.876655	0.937088	Coffee_milk_Soup	871	871	0.00528062	0.524601	-0.0818808	0.052912	0.122111	0.574454	Coffee_milk_Soup	111.273	79.5459	189.485	357.183	0.0368233	-0.0181788	-0.493677	0.621534	0.917503	NS	NS	NS
P22_Peptidoglycan synthesis IV (Enterococcus faecium)	Savoury_snacks	205	205	-0.0114351	0.501597	-0.143203	0.144649	0.323375	0.898958	Savoury_snacks	126	126	0.0331572	0.582506	-0.0854302	0.17876	0.633588	0.960509	Savoury_snacks	223	223	-0.010086	0.411775	0.16321	0.160862	0.31143	0.643623	Savoury_snacks	871	871	0.000932337	0.495994	0.0790797	0.073204	0.280325	0.942412	Savoury_snacks	47.7932	31.2939	38.6448	186.608	0.0573219	0.0379396	0.661868	0.508056	0.92389	NS	NS	NS
P14_Sucrose degradation, heme synthesis (aerobic)	Savoury_snacks	205	205	-0.0114351	0.501597	0.113504	0.11961	0.343795	0.898958	Savoury_snacks	126	126	0.0331572	0.582506	0.134645	0.144118	0.352041	0.960509	Savoury_snacks	223	223	-0.010086	0.411775	-0.0880401	0.128084	0.492588	0.803697	Savoury_snacks	871	871	0.000932337	0.495994	0.0122224	0.0563112	0.828219	0.942412	Savoury_snacks	69.8983	48.146	60.9551	315.363	0.0449756	0.0261031	0.580384	0.561656	0.92389	NS	NS	NS
P21_Glycogen degradation	Savoury_snacks	205	205	-0.0114351	0.501597	-0.0149455	0.17858	0.933387	0.961977	Savoury_snacks	126	126	0.0331572	0.582506	-0.0112357	0.202429	0.955829	0.960509	Savoury_snacks	223	223	-0.010086	0.411775	0.161268	0.152588	0.291739	0.643623	Savoury_snacks	871	871	0.000932337	0.495994	0.00740114	0.0648424	0.909153	0.942412	Savoury_snacks	31.3569	24.4037	42.9496	237.838	0.05451	0.0236039	0.433019	0.665001	0.92389	NS	NS	NS
P17_Polyamine synthesis	Savoury_snacks	205	205	-0.0114351	0.501597	0.161259	0.148242	0.277995	0.898958	Savoury_snacks	126	126	0.0331572	0.582506	-0.0354604	0.161915	0.827017	0.960509	Savoury_snacks	223	223	-0.010086	0.411775	-0.0228555	0.15672	0.884186	0.945164	Savoury_snacks	871	871	0.000932337	0.495994	0.00898475	0.0744798	0.904009	0.942412	Savoury_snacks	45.505	38.144	40.7149	180.27	0.0572942	0.0219102	0.382416	0.702153	0.92389	NS	NS	NS
P11_Mixed acid fermentation	Savoury_snacks	205	205	-0.0114351	0.501597	0.163851	0.161077	0.310282	0.898958	Savoury_snacks	126	126	0.0331572	0.582506	-0.0120338	0.182991	0.947677	0.960509	Savoury_snacks	223	223	-0.010086	0.411775	0.0424361	0.161951	0.793546	0.925301	Savoury_snacks	871	871	0.000932337	0.495994	-0.000992725	0.0657128	0.98795	0.98795	Savoury_snacks	38.5419	29.8636	38.1272	231.579	0.0543838	0.0217202	0.399387	0.689608	0.92389	NS	NS	NS
P6_Ferment. glutamate and pyruvate	Savoury_snacks	205	205	-0.0114351	0.501597	0.0856796	0.129397	0.508644	0.898958	Savoury_snacks	126	126	0.0331572	0.582506	0.0935419	0.163159	0.567503	0.960509	Savoury_snacks	223	223	-0.010086	0.411775	0.0271218	0.148742	0.855485	0.945164	Savoury_snacks	871	871	0.000932337	0.495994	-0.00787056	0.0583322	0.892701	0.942412	Savoury_snacks	59.7244	37.5644	45.1993	293.889	0.0478706	0.0172874	0.361128	0.718004	0.92389	NS	NS	NS
P4_Ferment. acetylene to acetate	Savoury_snacks	205	205	-0.0114351	0.501597	0.0237147	0.0655138	0.717751	0.93221	Savoury_snacks	126	126	0.0331572	0.582506	-0.0738787	0.0718535	0.305931	0.960509	Savoury_snacks	223	223	-0.010086	0.411775	0.0450933	0.0699658	0.519932	0.805895	Savoury_snacks	871	871	0.000932337	0.495994	-0.0190245	0.0293509	0.517045	0.942412	Savoury_snacks	232.989	193.689	204.281	1160.8	0.0236244	-0.0120865	-0.511613	0.608922	0.92389	NS	NS	NS
P31_Anhydromuropeptides recycling	Savoury_snacks	205	205	-0.0114351	0.501597	0.215697	0.111226	0.0538823	0.631305	Savoury_snacks	126	126	0.0331572	0.582506	0.0920333	0.158467	0.562482	0.960509	Savoury_snacks	223	223	-0.010086	0.411775	-0.21388	0.166014	0.199004	0.474548	Savoury_snacks	871	871	0.000932337	0.495994	-0.108958	0.0751729	0.147578	0.942412	Savoury_snacks	80.8334	39.822	36.2838	176.961	0.0547257	-0.0177937	-0.325144	0.745072	0.92389	NS	NS	NS
P10_FA and beta-oxidation	Savoury_snacks	205	205	-0.0114351	0.501597	-0.0459135	0.0696333	0.51043	0.898958	Savoury_snacks	126	126	0.0331572	0.582506	0.00886046	0.0926152	0.923945	0.960509	Savoury_snacks	223	223	-0.010086	0.411775	0.0486232	0.0689065	0.481172	0.803697	Savoury_snacks	871	871	0.000932337	0.495994	-0.0279849	0.0292935	0.339682	0.942412	Savoury_snacks	206.237	116.583	210.61	1165.35	0.0242622	-0.0181352	-0.747467	0.454782	0.92389	NS	NS	NS
P25_L-tyrosine synthesis	Savoury_snacks	205	205	-0.0114351	0.501597	-0.110296	0.142497	0.439834	0.898958	Savoury_snacks	126	126	0.0331572	0.582506	0.0860559	0.178	0.629651	0.960509	Savoury_snacks	223	223	-0.010086	0.411775	-0.320727	0.166155	0.0548737	0.206622	Savoury_snacks	871	871	0.000932337	0.495994	0.0329817	0.0719858	0.646945	0.942412	Savoury_snacks	49.2483	31.5615	36.2223	192.977	0.0567953	-0.0257043	-0.452578	0.650852	0.92389	NS	NS	NS
P9_Enterobactin-, LPS-, quinone-synthesis (E.coli)	Savoury_snacks	205	205	-0.0114351	0.501597	-0.0809811	0.128885	0.530515	0.898958	Savoury_snacks	126	126	0.0331572	0.582506	0.209485	0.119786	0.0828788	0.843566	Savoury_snacks	223	223	-0.010086	0.411775	-0.449447	0.129789	0.000643658	0.00672966	Savoury_snacks	871	871	0.000932337	0.495994	0.00804366	0.0538961	0.881396	0.942412	Savoury_snacks	60.1996	69.6926	59.3638	344.259	0.0432939	-0.0265921	-0.614222	0.539068	0.92389	NS	NS	NS
P21_Glycogen degradation	Meat_Potatoes_Gravy	205	205	0.0092388	0.66643	0.121091	0.153447	0.430971	0.989803	Meat_Potatoes_Gravy	126	126	0.0317397	0.612627	-0.353588	0.218197	0.107749	0.332716	Meat_Potatoes_Gravy	223	223	-0.12186	0.546907	-0.0462045	0.133199	0.729016	0.883152	Meat_Potatoes_Gravy	871	871	0.0247565	0.537179	-0.00515133	0.0644769	0.93634	0.967551	Meat_Potatoes_Gravy	42.4699	21.0041	56.3634	240.543	0.0526768	-0.0170027	-0.322774	0.746866	0.926114	NS	NS	NS
P30_Mannan degradation	Meat_Potatoes_Gravy	205	205	0.0092388	0.66643	-0.135485	0.165615	0.414296	0.989803	Meat_Potatoes_Gravy	126	126	0.0317397	0.612627	0.0600093	0.201659	0.766539	0.79209	Meat_Potatoes_Gravy	223	223	-0.12186	0.546907	0.108099	0.145766	0.459139	0.749122	Meat_Potatoes_Gravy	871	871	0.0247565	0.537179	-0.0238382	0.0569931	0.675857	0.832927	Meat_Potatoes_Gravy	36.4585	24.5905	47.0636	307.862	0.0490305	-0.0137395	-0.280224	0.779306	0.929173	NS	NS	NS
P10_FA and beta-oxidation	Meat_Potatoes_Gravy	205	205	0.0092388	0.66643	-0.0390281	0.0601715	0.517339	0.989803	Meat_Potatoes_Gravy	126	126	0.0317397	0.612627	0.119582	0.100594	0.236923	0.432036	Meat_Potatoes_Gravy	223	223	-0.12186	0.546907	0.00746311	0.0599977	0.901122	0.985137	Meat_Potatoes_Gravy	871	871	0.0247565	0.537179	0.00605582	0.0291493	0.835472	0.924987	Meat_Potatoes_Gravy	276.196	98.8216	277.799	1176.91	0.023378	0.00559551	0.23935	0.810834	0.930958	NS	NS	NS
P24_L-phenylalanine synthesis	Meat	205	205	0.0153272	0.592254	0.170576	0.111567	0.127875	0.330343	Meat	126	126	0.00509592	0.600788	0.0234418	0.163329	0.886117	0.944694	Meat	223	223	-0.0138947	0.560121	0.0185331	0.116365	0.873606	0.933855	Meat	871	871	-0.0016754	0.624155	0.0232615	0.059243	0.694678	0.884932	Meat	80.3393	37.4862	73.8513	284.922	0.0458061	0.0473755	1.03426	0.301014	0.933446	NS	NS	NS
P13_Ferment. to butanoate	Meat	205	205	0.0153272	0.592254	-0.167839	0.0838305	0.046629	0.2065	Meat	126	126	0.00509592	0.600788	0.0199656	0.116286	0.863967	0.944694	Meat	223	223	-0.0138947	0.560121	-0.287611	0.0849651	0.000844546	0.0261809	Meat	871	871	-0.0016754	0.624155	0.0526124	0.0400065	0.188826	0.670365	Meat	142.297	73.9516	138.522	624.798	0.0319509	-0.0299876	-0.938554	0.34796	0.933446	NS	NS	NS
P5_Biotin and FA-synthesis (E. coli)	Meat	205	205	0.0153272	0.592254	-0.0620363	0.0995447	0.533866	0.724315	Meat	126	126	0.00509592	0.600788	0.115615	0.138868	0.406752	0.928545	Meat	223	223	-0.0138947	0.560121	-0.0921439	0.106763	0.389053	0.670036	Meat	871	871	-0.0016754	0.624155	-0.0363052	0.0492327	0.461067	0.81314	Meat	100.917	51.8553	87.7317	412.565	0.039131	-0.0357198	-0.912826	0.361334	0.933446	NS	NS	NS
P16_Bifidobacterium shunt	Meat	205	205	0.0153272	0.592254	-0.171267	0.128568	0.184347	0.354997	Meat	126	126	0.00509592	0.600788	-0.152052	0.160156	0.344327	0.928545	Meat	223	223	-0.0138947	0.560121	0.0859117	0.124045	0.489309	0.7227	Meat	871	871	-0.0016754	0.624155	-0.032692	0.0565764	0.563523	0.831867	Meat	60.4973	38.9862	64.9896	312.414	0.0457923	-0.0438661	-0.957937	0.338095	0.933446	NS	NS	NS
P1_AA-synthesis and starch degradation	Meat	205	205	0.0153272	0.592254	0.29584	0.12401	0.0179933	0.139448	Meat	126	126	0.00509592	0.600788	-0.132842	0.152054	0.384054	0.928545	Meat	223	223	-0.0138947	0.560121	0.277373	0.12206	0.0240403	0.248417	Meat	871	871	-0.0016754	0.624155	-0.0444232	0.0536201	0.407628	0.81314	Meat	65.026	43.2517	67.12	347.812	0.0437182	0.0318382	0.728259	0.466455	0.933481	NS	NS	NS
P25_L-tyrosine synthesis	Meat	205	205	0.0153272	0.592254	-0.165261	0.121405	0.17498	0.354997	Meat	126	126	0.00509592	0.600788	0.404305	0.165657	0.016123	0.294238	Meat	223	223	-0.0138947	0.560121	-0.188372	0.1235	0.128646	0.362549	Meat	871	871	-0.0016754	0.624155	0.0613206	0.0572024	0.284022	0.733723	Meat	67.8461	36.4401	65.5636	305.613	0.0458608	0.0208442	0.45451	0.649462	0.933481	NS	NS	NS
P3_AA-synthesis	Meat	205	205	0.0153272	0.592254	0.192724	0.092709	0.0389177	0.201168	Meat	126	126	0.00509592	0.600788	-0.0494851	0.105494	0.639864	0.928545	Meat	223	223	-0.0138947	0.560121	0.209834	0.0903715	0.0211656	0.248417	Meat	871	871	-0.0016754	0.624155	-0.0392042	0.0395205	0.321477	0.766598	Meat	116.347	89.8554	122.444	640.257	0.0321262	0.0191643	0.596532	0.55082	0.933481	NS	NS	NS
P19_Biotin biosynthesis II (Bacillus subtilis)	Meat	205	205	0.0153272	0.592254	0.150509	0.112762	0.183484	0.354997	Meat	126	126	0.00509592	0.600788	0.0163637	0.144655	0.910122	0.944694	Meat	223	223	-0.0138947	0.560121	-0.00192187	0.123853	0.987634	0.987634	Meat	871	871	-0.0016754	0.624155	-0.0128276	0.0597884	0.830169	0.989816	Meat	78.6454	47.7899	65.1909	279.748	0.0460593	0.0188917	0.410161	0.681688	0.933481	NS	NS	NS
P21_Glycogen degradation	Meat	205	205	0.0153272	0.592254	0.197768	0.151983	0.194676	0.354997	Meat	126	126	0.00509592	0.600788	-0.200127	0.191958	0.299249	0.928545	Meat	223	223	-0.0138947	0.560121	0.0488664	0.113299	0.666673	0.826675	Meat	871	871	-0.0016754	0.624155	0.00455959	0.0515541	0.929545	0.993652	Meat	43.2925	27.1386	77.9025	376.248	0.043661	0.0164951	0.377801	0.705579	0.933481	NS	NS	NS
P30_Mannan degradation	Meat	205	205	0.0153272	0.592254	0.00706332	0.164749	0.965846	0.971891	Meat	126	126	0.00509592	0.600788	-0.0644907	0.176259	0.715094	0.928545	Meat	223	223	-0.0138947	0.560121	0.0256871	0.124152	0.836281	0.933855	Meat	871	871	-0.0016754	0.624155	0.016728	0.0455713	0.713655	0.884932	Meat	36.8429	32.1884	64.8776	481.523	0.0403097	0.0128459	0.318681	0.749968	0.933481	NS	NS	NS
P2_Aerobic respiration, ECA-, LPS-, heme-synthesis	Meat	205	205	0.0153272	0.592254	-0.15322	0.0868792	0.0793343	0.245936	Meat	126	126	0.00509592	0.600788	0.0438359	0.0658842	0.507149	0.928545	Meat	223	223	-0.0138947	0.560121	-0.115792	0.0663181	0.0822253	0.283221	Meat	871	871	-0.0016754	0.624155	0.0365033	0.027516	0.184983	0.670365	Meat	132.485	230.376	227.372	1320.78	0.0228754	0.00611427	0.267286	0.789249	0.933481	NS	NS	NS
P4_Ferment. acetylene to acetate	Meat	205	205	0.0153272	0.592254	-0.0127802	0.056003	0.81972	0.907547	Meat	126	126	0.00509592	0.600788	-0.095155	0.0681936	0.165483	0.854995	Meat	223	223	-0.0138947	0.560121	0.029296	0.0518576	0.572707	0.771909	Meat	871	871	-0.0016754	0.624155	0.0136484	0.023328	0.558655	0.831867	Meat	318.843	215.037	371.856	1837.58	0.0190925	0.00416915	0.218366	0.827144	0.933481	NS	NS	NS
P9_Enterobactin-, LPS-, quinone-synthesis (E.coli)	Meat	205	205	0.0153272	0.592254	-0.115268	0.109959	0.295781	0.495622	Meat	126	126	0.00509592	0.600788	0.029553	0.115515	0.798515	0.944694	Meat	223	223	-0.0138947	0.560121	-0.182822	0.098003	0.0634645	0.281057	Meat	871	871	-0.0016754	0.624155	0.0532287	0.0428132	0.214102	0.670365	Meat	82.7064	74.9412	104.117	545.562	0.0351945	0.00332712	0.0945351	0.924684	0.933481	NS	NS	NS
P12_Ferment. pyruvate and glycerol	Meat	205	205	0.0153272	0.592254	-0.0080635	0.0726762	0.911768	0.971891	Meat	126	126	0.00509592	0.600788	-0.0425186	0.0759643	0.576714	0.928545	Meat	223	223	-0.0138947	0.560121	0.114835	0.0551326	0.0384334	0.281057	Meat	871	871	-0.0016754	0.624155	-0.0188505	0.0238968	0.430427	0.81314	Meat	189.328	173.293	328.991	1751.14	0.020233	-0.00168877	-0.0834661	0.933481	0.933481	NS	NS	NS
P20_Terpenoid synthesis via mevalonate	Meat	205	205	0.0153272	0.592254	-0.0482437	0.108837	0.658056	0.815989	Meat	126	126	0.00509592	0.600788	0.29071	0.137653	0.0367687	0.379944	Meat	223	223	-0.0138947	0.560121	0.108161	0.115844	0.35151	0.640989	Meat	871	871	-0.0016754	0.624155	-0.0625564	0.0538504	0.24569	0.692399	Meat	84.42	52.7751	74.516	344.844	0.0423883	-0.0040301	-0.0950757	0.924255	0.933481	NS	NS	NS
P11_Mixed acid fermentation	Meat	205	205	0.0153272	0.592254	-0.22375	0.137109	0.104278	0.293874	Meat	126	126	0.00509592	0.600788	0.224108	0.173106	0.197933	0.876559	Meat	223	223	-0.0138947	0.560121	-0.152845	0.119563	0.202487	0.51037	Meat	871	871	-0.0016754	0.624155	0.0338298	0.0522333	0.517372	0.831867	Meat	53.1948	33.3716	69.9529	366.526	0.043725	-0.00519258	-0.118755	0.905469	0.933481	NS	NS	NS
P27_dTTP synthesis	Meat	205	205	0.0153272	0.592254	0.048687	0.137728	0.724086	0.863333	Meat	126	126	0.00509592	0.600788	-0.123982	0.163395	0.44947	0.928545	Meat	223	223	-0.0138947	0.560121	-0.0747802	0.119618	0.532525	0.750376	Meat	871	871	-0.0016754	0.624155	0.00701819	0.056285	0.900798	0.993652	Meat	52.7178	37.4559	69.8884	315.656	0.0458485	-0.0106956	-0.233282	0.815543	0.933481	NS	NS	NS
P26_Thiamin synthesis	Meat	205	205	0.0153272	0.592254	-0.125368	0.126232	0.321838	0.498849	Meat	126	126	0.00509592	0.600788	0.000401671	0.169439	0.998112	0.998112	Meat	223	223	-0.0138947	0.560121	-0.146264	0.117366	0.214026	0.51037	Meat	871	871	-0.0016754	0.624155	0.0406741	0.0565462	0.472146	0.81314	Meat	62.757	34.8317	72.5967	312.747	0.0455048	-0.0119092	-0.261713	0.793542	0.933481	NS	NS	NS
P18_Formaldehyde assimilation	Meat	205	205	0.0153272	0.592254	-0.0776181	0.123519	0.530468	0.724315	Meat	126	126	0.00509592	0.600788	0.0640973	0.148083	0.665902	0.928545	Meat	223	223	-0.0138947	0.560121	0.0179634	0.112646	0.873449	0.933855	Meat	871	871	-0.0016754	0.624155	-0.0194578	0.0490615	0.691761	0.884932	Meat	65.5441	45.6028	78.8072	415.45	0.0406422	-0.0145894	-0.358971	0.719617	0.933481	NS	NS	NS
P29_DMK synthesis	Meat	205	205	0.0153272	0.592254	-0.173645	0.0937479	0.0654697	0.225507	Meat	126	126	0.00509592	0.600788	-0.0547945	0.110284	0.620204	0.928545	Meat	223	223	-0.0138947	0.560121	-0.147115	0.0874649	0.0940084	0.291426	Meat	871	871	-0.0016754	0.624155	0.0511035	0.0412966	0.216247	0.670365	Meat	113.783	82.2201	130.717	586.37	0.0330935	-0.0148157	-0.447691	0.654376	0.933481	NS	NS	NS
P28_UTP and CTP degradation	Meat	205	205	0.0153272	0.592254	0.14611	0.141709	0.303768	0.495622	Meat	126	126	0.00509592	0.600788	0.139466	0.149687	0.353355	0.928545	Meat	223	223	-0.0138947	0.560121	-0.213846	0.114231	0.0625458	0.281057	Meat	871	871	-0.0016754	0.624155	-0.0227509	0.0527251	0.666211	0.884932	Meat	49.7969	44.6304	76.6352	359.721	0.0434052	-0.0208596	-0.480578	0.630816	0.933481	NS	NS	NS
P8_Creatinine degradation I	Meat	205	205	0.0153272	0.592254	0.0618201	0.106094	0.56076	0.724315	Meat	126	126	0.00509592	0.600788	0.0507583	0.140678	0.718874	0.928545	Meat	223	223	-0.0138947	0.560121	-0.133877	0.123575	0.279846	0.542201	Meat	871	871	-0.0016754	0.624155	-0.0437456	0.059617	0.463283	0.81314	Meat	88.8421	50.53	65.485	281.358	0.0453509	-0.0267743	-0.590382	0.554935	0.933481	NS	NS	NS
P23_L-glutamine synthesis	Meat	205	205	0.0153272	0.592254	-0.26856	0.129202	0.0389357	0.201168	Meat	126	126	0.00509592	0.600788	0.0257277	0.160639	0.873026	0.944694	Meat	223	223	-0.0138947	0.560121	-0.00952449	0.122649	0.938173	0.969445	Meat	871	871	-0.0016754	0.624155	-0.00222614	0.0563587	0.968501	0.99812	Meat	59.9048	38.7522	66.4771	314.832	0.0456452	-0.0342213	-0.749725	0.45342	0.933481	NS	NS	NS
P20_Terpenoid synthesis via mevalonate	Pastry_Cream	205	205	-0.0651555	0.556024	-0.152646	0.114076	0.182388	0.953657	Pastry_Cream	126	126	0.0592037	0.832987	0.0108482	0.118603	0.927274	0.984894	Pastry_Cream	223	223	-0.0509842	0.476141	0.0667287	0.136947	0.626568	0.961045	Pastry_Cream	871	871	0.0200538	0.596495	0.0513913	0.0560522	0.359478	0.830153	Pastry_Cream	76.8445	71.0905	53.3202	318.284	0.0438723	0.0172388	0.392931	0.69437	0.934286	NS	NS	NS
P17_Polyamine synthesis	Pastry_Cream	205	205	-0.0651555	0.556024	0.0927728	0.133559	0.488102	0.953657	Pastry_Cream	126	126	0.0592037	0.832987	-0.182859	0.129443	0.160344	0.984894	Pastry_Cream	223	223	-0.0509842	0.476141	0.136058	0.136766	0.32093	0.765294	Pastry_Cream	871	871	0.0200538	0.596495	0.0149145	0.0616178	0.8088	0.966465	Pastry_Cream	56.0604	59.6821	53.4621	263.383	0.0480798	0.0126903	0.263942	0.791824	0.934286	NS	NS	NS
P10_FA and beta-oxidation	Pastry_Cream	205	205	-0.0651555	0.556024	0.0202687	0.062667	0.746707	0.964115	Pastry_Cream	126	126	0.0592037	0.832987	-0.036712	0.0747204	0.624109	0.984894	Pastry_Cream	223	223	-0.0509842	0.476141	0.117785	0.0590183	0.0472191	0.542133	Pastry_Cream	871	871	0.0200538	0.596495	-0.028998	0.0242917	0.23291	0.830153	Pastry_Cream	254.637	179.111	287.095	1694.67	0.0203468	-0.00693055	-0.340621	0.733389	0.934286	NS	NS	NS
P12_Ferment. pyruvate and glycerol	Pastry_Cream	205	205	-0.0651555	0.556024	-0.0303831	0.0766056	0.692077	0.964115	Pastry_Cream	126	126	0.0592037	0.832987	0.0918477	0.0638054	0.152613	0.984894	Pastry_Cream	223	223	-0.0509842	0.476141	-0.0139049	0.0657215	0.832639	0.961045	Pastry_Cream	871	871	0.0200538	0.596495	-0.0198511	0.0248528	0.424657	0.830153	Pastry_Cream	170.404	245.632	231.518	1619.01	0.0210047	-0.0079305	-0.377559	0.705758	0.934286	NS	NS	NS
P30_Mannan degradation	Pastry_Cream	205	205	-0.0651555	0.556024	-0.209027	0.172735	0.227676	0.953657	Pastry_Cream	126	126	0.0592037	0.832987	0.0302603	0.149182	0.839603	0.984894	Pastry_Cream	223	223	-0.0509842	0.476141	0.0537125	0.146523	0.714289	0.961045	Pastry_Cream	871	871	0.0200538	0.596495	-0.00572626	0.047424	0.90392	0.966597	Pastry_Cream	33.515	44.9329	46.5786	444.636	0.0418978	-0.00998855	-0.238403	0.811569	0.934286	NS	NS	NS
P26_Thiamin synthesis	Pastry_Cream	205	205	-0.0651555	0.556024	0.114436	0.132918	0.390297	0.953657	Pastry_Cream	126	126	0.0592037	0.832987	0.144097	0.14275	0.314798	0.984894	Pastry_Cream	223	223	-0.0509842	0.476141	0.111488	0.138833	0.42283	0.872811	Pastry_Cream	871	871	0.0200538	0.596495	-0.0840326	0.0587892	0.153254	0.830153	Pastry_Cream	56.6025	49.0736	51.882	289.337	0.0473039	-0.0111454	-0.235613	0.813733	0.934286	NS	NS	NS
P6_Ferment. glutamate and pyruvate	Pastry_Cream	205	205	-0.0651555	0.556024	0.0356085	0.116477	0.760143	0.964115	Pastry_Cream	126	126	0.0592037	0.832987	0.0153068	0.131664	0.907644	0.984894	Pastry_Cream	223	223	-0.0509842	0.476141	-0.0297198	0.130088	0.819504	0.961045	Pastry_Cream	871	871	0.0200538	0.596495	-0.021237	0.0482551	0.659976	0.942779	Pastry_Cream	73.709	57.6853	59.0919	429.451	0.040163	-0.0118863	-0.295952	0.767266	0.934286	NS	NS	NS
P23_L-glutamine synthesis	Pastry_Cream	205	205	-0.0651555	0.556024	-0.0790229	0.137315	0.565614	0.964115	Pastry_Cream	126	126	0.0592037	0.832987	-0.0503108	0.135847	0.711775	0.984894	Pastry_Cream	223	223	-0.0509842	0.476141	0.0578838	0.144729	0.689589	0.961045	Pastry_Cream	871	871	0.0200538	0.596495	-0.0112643	0.0586446	0.847727	0.966597	Pastry_Cream	53.0349	54.1876	47.7407	290.766	0.0473658	-0.0166672	-0.351882	0.724927	0.934286	NS	NS	NS
P6_Ferment. glutamate and pyruvate	Icecream_Beer_non-alcoholic	205	205	-0.119788	0.542039	0.0984708	0.115516	0.394993	0.909681	Icecream_Beer_non-alcoholic	126	126	-0.0410161	0.57799	-0.195749	0.156489	0.213412	0.652499	Icecream_Beer_non-alcoholic	223	223	-0.0245111	0.517043	0.292346	0.114171	0.0111285	0.172492	Icecream_Beer_non-alcoholic	871	871	0.0407092	0.884625	0.0343301	0.0307024	0.26381	0.911697	Icecream_Beer_non-alcoholic	74.9405	40.835	76.7159	1060.85	0.0282465	0.046462	1.64487	0.0999957	0.934449	NS	NS	NS
P29_DMK synthesis	Icecream_Beer_non-alcoholic	205	205	-0.119788	0.542039	0.0616588	0.0987386	0.533037	0.909681	Icecream_Beer_non-alcoholic	126	126	-0.0410161	0.57799	0.181036	0.110499	0.103968	0.652499	Icecream_Beer_non-alcoholic	223	223	-0.0245111	0.517043	0.0894049	0.0923612	0.334126	0.727843	Icecream_Beer_non-alcoholic	871	871	0.0407092	0.884625	0.0247067	0.0273693	0.366928	0.911697	Icecream_Beer_non-alcoholic	102.571	81.8999	117.225	1334.97	0.0247184	0.0394793	1.59717	0.110229	0.934449	NS	NS	NS
P25_L-tyrosine synthesis	Icecream_Beer_non-alcoholic	205	205	-0.119788	0.542039	-0.0264052	0.12748	0.836118	0.909681	Icecream_Beer_non-alcoholic	126	126	-0.0410161	0.57799	-0.270441	0.169982	0.11424	0.652499	Icecream_Beer_non-alcoholic	223	223	-0.0245111	0.517043	-0.190393	0.129904	0.144195	0.638576	Icecream_Beer_non-alcoholic	871	871	0.0407092	0.884625	0.070964	0.0378435	0.0611026	0.911697	Icecream_Beer_non-alcoholic	61.5342	34.6096	59.2588	698.259	0.0342261	0.0319613	0.93383	0.350392	0.934449	NS	NS	NS
P27_dTTP synthesis	Icecream_Beer_non-alcoholic	205	205	-0.119788	0.542039	0.0560675	0.143956	0.697341	0.909681	Icecream_Beer_non-alcoholic	126	126	-0.0410161	0.57799	0.241659	0.164287	0.14392	0.652499	Icecream_Beer_non-alcoholic	223	223	-0.0245111	0.517043	0.0524199	0.125833	0.677394	0.777749	Icecream_Beer_non-alcoholic	871	871	0.0407092	0.884625	0.00413634	0.0372876	0.911697	0.911697	Icecream_Beer_non-alcoholic	48.2546	37.0505	63.1558	719.237	0.0339481	0.0206809	0.60919	0.542399	0.934449	NS	NS	NS
P1_AA-synthesis and starch degradation	Icecream_Beer_non-alcoholic	205	205	-0.119788	0.542039	0.0540563	0.131503	0.681469	0.909681	Icecream_Beer_non-alcoholic	126	126	-0.0410161	0.57799	0.1762	0.153536	0.25341	0.652499	Icecream_Beer_non-alcoholic	223	223	-0.0245111	0.517043	-0.00410637	0.129855	0.974802	0.974802	Icecream_Beer_non-alcoholic	871	871	0.0407092	0.884625	0.0112117	0.0355398	0.752482	0.911697	Icecream_Beer_non-alcoholic	57.8267	42.421	59.3038	791.718	0.0324226	0.0202188	0.6236	0.53289	0.934449	NS	NS	NS
P4_Ferment. acetylene to acetate	Icecream_Beer_non-alcoholic	205	205	-0.119788	0.542039	0.0317006	0.0585042	0.588526	0.909681	Icecream_Beer_non-alcoholic	126	126	-0.0410161	0.57799	0.0659322	0.0693126	0.3434	0.652499	Icecream_Beer_non-alcoholic	223	223	-0.0245111	0.517043	0.0912568	0.0543862	0.0948051	0.587792	Icecream_Beer_non-alcoholic	871	871	0.0407092	0.884625	0.00935746	0.015448	0.544848	0.911697	Icecream_Beer_non-alcoholic	292.164	208.15	338.082	4190.39	0.0141016	0.0185033	1.31214	0.189472	0.934449	NS	NS	NS
P14_Sucrose degradation, heme synthesis (aerobic)	Icecream_Beer_non-alcoholic	205	205	-0.119788	0.542039	0.0330363	0.107072	0.757991	0.909681	Icecream_Beer_non-alcoholic	126	126	-0.0410161	0.57799	0.0380168	0.139396	0.785533	0.873159	Icecream_Beer_non-alcoholic	223	223	-0.0245111	0.517043	0.0719747	0.0997702	0.471437	0.727843	Icecream_Beer_non-alcoholic	871	871	0.0407092	0.884625	0.0085125	0.0296592	0.774173	0.911697	Icecream_Beer_non-alcoholic	87.227	51.4636	100.461	1136.8	0.0269587	0.0158042	0.586238	0.557715	0.934449	NS	NS	NS
P13_Ferment. to butanoate	Icecream_Beer_non-alcoholic	205	205	-0.119788	0.542039	0.149923	0.0878653	0.0895147	0.909681	Icecream_Beer_non-alcoholic	126	126	-0.0410161	0.57799	-0.113615	0.117244	0.334471	0.652499	Icecream_Beer_non-alcoholic	223	223	-0.0245111	0.517043	0.207623	0.0905727	0.0228452	0.190499	Icecream_Beer_non-alcoholic	871	871	0.0407092	0.884625	-0.00692439	0.0265288	0.794144	0.911697	Icecream_Beer_non-alcoholic	129.529	72.7473	121.9	1420.91	0.0239382	0.0152569	0.637344	0.523901	0.934449	NS	NS	NS
P20_Terpenoid synthesis via mevalonate	Icecream_Beer_non-alcoholic	205	205	-0.119788	0.542039	-0.0714118	0.11371	0.530714	0.909681	Icecream_Beer_non-alcoholic	126	126	-0.0410161	0.57799	-0.146487	0.141246	0.301773	0.652499	Icecream_Beer_non-alcoholic	223	223	-0.0245111	0.517043	-0.0786872	0.121929	0.519382	0.727843	Icecream_Beer_non-alcoholic	871	871	0.0407092	0.884625	0.0389077	0.0356779	0.275784	0.911697	Icecream_Beer_non-alcoholic	77.3391	50.1241	67.2642	785.6	0.0319385	0.0126566	0.396282	0.691897	0.934449	NS	NS	NS
P21_Glycogen degradation	Icecream_Beer_non-alcoholic	205	205	-0.119788	0.542039	0.164509	0.159114	0.302435	0.909681	Icecream_Beer_non-alcoholic	126	126	-0.0410161	0.57799	0.240854	0.193908	0.21662	0.652499	Icecream_Beer_non-alcoholic	223	223	-0.0245111	0.517043	0.0730829	0.119073	0.540012	0.727843	Icecream_Beer_non-alcoholic	871	871	0.0407092	0.884625	-0.00667944	0.0341527	0.844988	0.911697	Icecream_Beer_non-alcoholic	39.4986	26.5956	70.5302	857.331	0.0317188	0.0124066	0.391143	0.695692	0.934449	NS	NS	NS
P3_AA-synthesis	Icecream_Beer_non-alcoholic	205	205	-0.119788	0.542039	0.0193583	0.0979452	0.843525	0.909681	Icecream_Beer_non-alcoholic	126	126	-0.0410161	0.57799	0.100899	0.106466	0.345182	0.652499	Icecream_Beer_non-alcoholic	223	223	-0.0245111	0.517043	0.00576844	0.0961913	0.952236	0.974802	Icecream_Beer_non-alcoholic	871	871	0.0407092	0.884625	0.00485648	0.0261958	0.852965	0.911697	Icecream_Beer_non-alcoholic	104.24	88.2221	108.076	1457.26	0.0238515	0.0105928	0.444115	0.65696	0.934449	NS	NS	NS
P18_Formaldehyde assimilation	Icecream_Beer_non-alcoholic	205	205	-0.119788	0.542039	0.0689667	0.129149	0.593932	0.909681	Icecream_Beer_non-alcoholic	126	126	-0.0410161	0.57799	0.0588012	0.149889	0.695534	0.862462	Icecream_Beer_non-alcoholic	223	223	-0.0245111	0.517043	-0.120285	0.118164	0.309836	0.727843	Icecream_Beer_non-alcoholic	871	871	0.0407092	0.884625	0.00595897	0.0325044	0.854583	0.911697	Icecream_Beer_non-alcoholic	59.9539	44.5104	71.6188	946.489	0.0298465	0.00336504	0.112745	0.910233	0.934449	NS	NS	NS
P24_L-phenylalanine synthesis	Icecream_Beer_non-alcoholic	205	205	-0.119788	0.542039	-0.0162908	0.117298	0.889682	0.909681	Icecream_Beer_non-alcoholic	126	126	-0.0410161	0.57799	0.0656673	0.165204	0.691711	0.862462	Icecream_Beer_non-alcoholic	223	223	-0.0245111	0.517043	-0.181754	0.121732	0.136873	0.638576	Icecream_Beer_non-alcoholic	871	871	0.0407092	0.884625	0.0206485	0.0392443	0.598917	0.911697	Icecream_Beer_non-alcoholic	72.6811	36.6403	67.4822	649.302	0.0347922	0.00286162	0.0822489	0.934449	0.934449	NS	NS	NS
P30_Mannan degradation	Icecream_Beer_non-alcoholic	205	205	-0.119788	0.542039	0.118344	0.172008	0.492245	0.909681	Icecream_Beer_non-alcoholic	126	126	-0.0410161	0.57799	-0.00434377	0.178483	0.980624	0.980624	Icecream_Beer_non-alcoholic	223	223	-0.0245111	0.517043	0.13295	0.130237	0.308471	0.727843	Icecream_Beer_non-alcoholic	871	871	0.0407092	0.884625	-0.00785828	0.0301911	0.794706	0.911697	Icecream_Beer_non-alcoholic	33.799	31.3912	58.9566	1097.09	0.0286154	0.0025225	0.0881518	0.929756	0.934449	NS	NS	NS
P10_FA and beta-oxidation	Icecream_Beer_non-alcoholic	205	205	-0.119788	0.542039	0.0568085	0.0620469	0.361005	0.909681	Icecream_Beer_non-alcoholic	126	126	-0.0410161	0.57799	-0.01717	0.08871	0.846859	0.880371	Icecream_Beer_non-alcoholic	223	223	-0.0245111	0.517043	0.026454	0.0536865	0.62269	0.772136	Icecream_Beer_non-alcoholic	871	871	0.0407092	0.884625	-0.00535143	0.0187697	0.775629	0.911697	Icecream_Beer_non-alcoholic	259.752	127.074	346.952	2838.47	0.0167313	0.00183713	0.109802	0.912567	0.934449	NS	NS	NS
P12_Ferment. pyruvate and glycerol	Icecream_Beer_non-alcoholic	205	205	-0.119788	0.542039	0.0171712	0.0760083	0.821502	0.909681	Icecream_Beer_non-alcoholic	126	126	-0.0410161	0.57799	0.124879	0.0761316	0.103562	0.652499	Icecream_Beer_non-alcoholic	223	223	-0.0245111	0.517043	0.0326811	0.0585024	0.576991	0.74528	Icecream_Beer_non-alcoholic	871	871	0.0407092	0.884625	-0.0119332	0.0158225	0.450939	0.911697	Icecream_Beer_non-alcoholic	173.092	172.532	292.182	3994.36	0.0146929	-0.00293579	-0.19981	0.841629	0.934449	NS	NS	NS
P15_Methanogenesis	Icecream_Beer_non-alcoholic	205	205	-0.119788	0.542039	-0.0561988	0.0369364	0.12987	0.909681	Icecream_Beer_non-alcoholic	126	126	-0.0410161	0.57799	-0.0841112	0.122043	0.492033	0.709799	Icecream_Beer_non-alcoholic	223	223	-0.0245111	0.517043	0.163726	0.119861	0.173366	0.647316	Icecream_Beer_non-alcoholic	871	871	0.0407092	0.884625	0.0403211	0.0367017	0.272241	0.911697	Icecream_Beer_non-alcoholic	732.977	67.1387	69.6052	742.383	0.024906	-0.0034177	-0.137224	0.890854	0.934449	NS	NS	NS
P7_Colanic acid building blocks synthesis	Icecream_Beer_non-alcoholic	205	205	-0.119788	0.542039	0.0303726	0.0964179	0.753084	0.909681	Icecream_Beer_non-alcoholic	126	126	-0.0410161	0.57799	0.15146	0.143121	0.292061	0.652499	Icecream_Beer_non-alcoholic	223	223	-0.0245111	0.517043	0.0801763	0.0958269	0.403694	0.727843	Icecream_Beer_non-alcoholic	871	871	0.0407092	0.884625	-0.0241672	0.031195	0.43872	0.911697	Icecream_Beer_non-alcoholic	107.568	48.8193	108.899	1027.62	0.027811	-0.00420925	-0.151352	0.879698	0.934449	NS	NS	NS
P9_Enterobactin-, LPS-, quinone-synthesis (E.coli)	Icecream_Beer_non-alcoholic	205	205	-0.119788	0.542039	-0.0464382	0.115209	0.687324	0.909681	Icecream_Beer_non-alcoholic	126	126	-0.0410161	0.57799	-0.0883062	0.116662	0.450568	0.708462	Icecream_Beer_non-alcoholic	223	223	-0.0245111	0.517043	-0.0656369	0.10377	0.527712	0.727843	Icecream_Beer_non-alcoholic	871	871	0.0407092	0.884625	0.00636958	0.0283872	0.822513	0.911697	Icecream_Beer_non-alcoholic	75.3398	73.4756	92.8655	1240.95	0.0259707	-0.00551594	-0.212391	0.831802	0.934449	NS	NS	NS
P2_Aerobic respiration, ECA-, LPS-, heme-synthesis	Icecream_Beer_non-alcoholic	205	205	-0.119788	0.542039	-0.0492475	0.0914547	0.590841	0.909681	Icecream_Beer_non-alcoholic	126	126	-0.0410161	0.57799	-0.0542553	0.0658562	0.411719	0.708462	Icecream_Beer_non-alcoholic	223	223	-0.0245111	0.517043	-0.0639845	0.0700821	0.36226	0.727843	Icecream_Beer_non-alcoholic	871	871	0.0407092	0.884625	0.00347714	0.0182468	0.848914	0.911697	Icecream_Beer_non-alcoholic	119.56	230.572	203.604	3003.48	0.0167666	-0.00589834	-0.351792	0.724995	0.934449	NS	NS	NS
P17_Polyamine synthesis	Icecream_Beer_non-alcoholic	205	205	-0.119788	0.542039	-0.0400021	0.132798	0.763556	0.909681	Icecream_Beer_non-alcoholic	126	126	-0.0410161	0.57799	-0.143603	0.155571	0.357822	0.652499	Icecream_Beer_non-alcoholic	223	223	-0.0245111	0.517043	-0.0852637	0.121958	0.485222	0.727843	Icecream_Beer_non-alcoholic	871	871	0.0407092	0.884625	0.0132295	0.0392271	0.736007	0.911697	Icecream_Beer_non-alcoholic	56.7048	41.3184	67.2328	649.871	0.0350257	-0.00654719	-0.186925	0.851719	0.934449	NS	NS	NS
P23_L-glutamine synthesis	Icecream_Beer_non-alcoholic	205	205	-0.119788	0.542039	-0.0287649	0.136497	0.833309	0.909681	Icecream_Beer_non-alcoholic	126	126	-0.0410161	0.57799	-0.0304015	0.16257	0.851972	0.880371	Icecream_Beer_non-alcoholic	223	223	-0.0245111	0.517043	-0.169658	0.128443	0.187931	0.647316	Icecream_Beer_non-alcoholic	871	871	0.0407092	0.884625	0.00913824	0.037335	0.806698	0.911697	Icecream_Beer_non-alcoholic	53.6726	37.8373	60.6151	717.41	0.0339122	-0.00738578	-0.217791	0.827592	0.934449	NS	NS	NS
P31_Anhydromuropeptides recycling	Icecream_Beer_non-alcoholic	205	205	-0.119788	0.542039	-0.0113923	0.100297	0.909681	0.909681	Icecream_Beer_non-alcoholic	126	126	-0.0410161	0.57799	-0.0410862	0.152936	0.78866	0.873159	Icecream_Beer_non-alcoholic	223	223	-0.0245111	0.517043	0.0139203	0.12982	0.914707	0.974802	Icecream_Beer_non-alcoholic	871	871	0.0407092	0.884625	-0.00947918	0.0396412	0.811066	0.911697	Icecream_Beer_non-alcoholic	99.4089	42.7547	59.3361	636.367	0.0345472	-0.0096619	-0.279673	0.779729	0.934449	NS	NS	NS
P19_Biotin biosynthesis II (Bacillus subtilis)	Icecream_Beer_non-alcoholic	205	205	-0.119788	0.542039	-0.0268198	0.118381	0.821002	0.909681	Icecream_Beer_non-alcoholic	126	126	-0.0410161	0.57799	0.32705	0.14333	0.0242634	0.417581	Icecream_Beer_non-alcoholic	223	223	-0.0245111	0.517043	0.128378	0.12993	0.324226	0.727843	Icecream_Beer_non-alcoholic	871	871	0.0407092	0.884625	-0.0520624	0.0395699	0.188621	0.911697	Icecream_Beer_non-alcoholic	71.3571	48.6773	59.235	638.661	0.0349657	-0.0142306	-0.406987	0.684017	0.934449	NS	NS	NS
P8_Creatinine degradation I	Icecream_Beer_non-alcoholic	205	205	-0.119788	0.542039	0.0258693	0.110979	0.815923	0.909681	Icecream_Beer_non-alcoholic	126	126	-0.0410161	0.57799	-0.15989	0.141701	0.261418	0.652499	Icecream_Beer_non-alcoholic	223	223	-0.0245111	0.517043	-0.0550053	0.130227	0.673165	0.777749	Icecream_Beer_non-alcoholic	871	871	0.0407092	0.884625	-0.00651061	0.0395065	0.869141	0.911697	Icecream_Beer_non-alcoholic	81.1932	49.8027	58.9657	640.711	0.0346965	-0.0159839	-0.460678	0.645029	0.934449	NS	NS	NS
P16_Bifidobacterium shunt	Icecream_Beer_non-alcoholic	205	205	-0.119788	0.542039	-0.0157767	0.134984	0.907074	0.909681	Icecream_Beer_non-alcoholic	126	126	-0.0410161	0.57799	-0.0797526	0.162532	0.624542	0.841775	Icecream_Beer_non-alcoholic	223	223	-0.0245111	0.517043	-0.115038	0.130334	0.378409	0.727843	Icecream_Beer_non-alcoholic	871	871	0.0407092	0.884625	-0.0126697	0.0374853	0.735451	0.911697	Icecream_Beer_non-alcoholic	54.8824	37.8549	58.8687	711.67	0.034035	-0.0227896	-0.669593	0.503117	0.934449	NS	NS	NS
P11_Mixed acid fermentation	Icecream_Beer_non-alcoholic	205	205	-0.119788	0.542039	-0.169814	0.143772	0.238959	0.909681	Icecream_Beer_non-alcoholic	126	126	-0.0410161	0.57799	0.218612	0.17528	0.214746	0.652499	Icecream_Beer_non-alcoholic	223	223	-0.0245111	0.517043	-0.365988	0.123714	0.00343597	0.106515	Icecream_Beer_non-alcoholic	871	871	0.0407092	0.884625	-0.00396674	0.0346114	0.908783	0.911697	Icecream_Beer_non-alcoholic	48.3785	32.549	65.3373	834.758	0.0319272	-0.0288716	-0.904294	0.365839	0.934449	NS	NS	NS
P26_Thiamin synthesis	Icecream_Beer_non-alcoholic	205	205	-0.119788	0.542039	-0.069461	0.132184	0.59983	0.909681	Icecream_Beer_non-alcoholic	126	126	-0.0410161	0.57799	-0.0485245	0.171424	0.777613	0.873159	Icecream_Beer_non-alcoholic	223	223	-0.0245111	0.517043	-0.0141757	0.123839	0.908972	0.974802	Icecream_Beer_non-alcoholic	871	871	0.0407092	0.884625	-0.0307132	0.0374572	0.412467	0.911697	Icecream_Beer_non-alcoholic	57.2321	34.0295	65.2061	712.737	0.0339187	-0.0327213	-0.964697	0.334696	0.934449	NS	NS	NS
P22_Peptidoglycan synthesis IV (Enterococcus faecium)	Icecream_Beer_non-alcoholic	205	205	-0.119788	0.542039	-0.0640362	0.129464	0.62141	0.909681	Icecream_Beer_non-alcoholic	126	126	-0.0410161	0.57799	-0.115468	0.172172	0.503728	0.709799	Icecream_Beer_non-alcoholic	223	223	-0.0245111	0.517043	-0.108139	0.125399	0.389441	0.727843	Icecream_Beer_non-alcoholic	871	871	0.0407092	0.884625	-0.0214958	0.0385765	0.577518	0.911697	Icecream_Beer_non-alcoholic	59.6628	33.7347	63.5937	671.978	0.0347321	-0.0350284	-1.00853	0.313199	0.934449	NS	NS	NS
P5_Biotin and FA-synthesis (E. coli)	Icecream_Beer_non-alcoholic	205	205	-0.119788	0.542039	-0.0666037	0.104048	0.522827	0.909681	Icecream_Beer_non-alcoholic	126	126	-0.0410161	0.57799	-0.309305	0.138091	0.0269407	0.417581	Icecream_Beer_non-alcoholic	223	223	-0.0245111	0.517043	0.0725126	0.112338	0.519296	0.727843	Icecream_Beer_non-alcoholic	871	871	0.0407092	0.884625	-0.033752	0.0326056	0.300884	0.911697	Icecream_Beer_non-alcoholic	92.3705	52.4409	79.2399	940.625	0.029302	-0.0415347	-1.41747	0.156345	0.934449	NS	NS	NS
P28_UTP and CTP degradation	Icecream_Beer_non-alcoholic	205	205	-0.119788	0.542039	0.103652	0.148341	0.48553	0.909681	Icecream_Beer_non-alcoholic	126	126	-0.0410161	0.57799	-0.113172	0.151687	0.457072	0.708462	Icecream_Beer_non-alcoholic	223	223	-0.0245111	0.517043	-0.270892	0.119667	0.0245805	0.190499	Icecream_Beer_non-alcoholic	871	871	0.0407092	0.884625	-0.0374793	0.0349096	0.283297	0.911697	Icecream_Beer_non-alcoholic	45.4439	43.4612	69.8313	820.558	0.0319553	-0.0509336	-1.5939	0.110959	0.934449	NS	NS	NS
P7_Colanic acid building blocks synthesis	Meat_Potatoes_Gravy	205	205	0.0092388	0.66643	-0.0170434	0.0928956	0.854618	0.989803	Meat_Potatoes_Gravy	126	126	0.0317397	0.612627	-0.316479	0.159929	0.0501212	0.199696	Meat_Potatoes_Gravy	223	223	-0.12186	0.546907	-0.181015	0.106599	0.0909236	0.602171	Meat_Potatoes_Gravy	871	871	0.0247565	0.537179	0.118677	0.0587739	0.0437733	0.271395	Meat_Potatoes_Gravy	115.88	39.0971	88.0022	289.488	0.0433364	0.00765767	0.176703	0.859742	0.936242	NS	NS	NS
P31_Anhydromuropeptides recycling	Meat_Potatoes_Gravy	205	205	0.0092388	0.66643	-0.0799387	0.0964537	0.408223	0.989803	Meat_Potatoes_Gravy	126	126	0.0317397	0.612627	0.161311	0.172281	0.350985	0.604475	Meat_Potatoes_Gravy	223	223	-0.12186	0.546907	-0.129185	0.144874	0.37354	0.723733	Meat_Potatoes_Gravy	871	871	0.0247565	0.537179	0.0353761	0.0748298	0.636508	0.832927	Meat_Potatoes_Gravy	107.489	33.6918	47.6451	178.587	0.0521703	-0.00815139	-0.156246	0.875839	0.936242	NS	NS	NS
P8_Creatinine degradation I	Meat_Potatoes_Gravy	205	205	0.0092388	0.66643	0.272206	0.105166	0.0103552	0.321011	Meat_Potatoes_Gravy	126	126	0.0317397	0.612627	-0.0368498	0.160972	0.819321	0.819321	Meat_Potatoes_Gravy	223	223	-0.12186	0.546907	-0.0556729	0.145601	0.702565	0.883152	Meat_Potatoes_Gravy	871	871	0.0247565	0.537179	-0.10603	0.0744969	0.155014	0.40509	Meat_Potatoes_Gravy	90.4171	38.5922	47.1703	180.187	0.0529726	0.00409281	0.0772627	0.938415	0.938415	NS	NS	NS
P5_Biotin and FA-synthesis (E. coli)	Meat_Potatoes_Gravy	205	205	0.0092388	0.66643	0.107423	0.100044	0.284231	0.989803	Meat_Potatoes_Gravy	126	126	0.0317397	0.612627	0.103025	0.15903	0.518333	0.678307	Meat_Potatoes_Gravy	223	223	-0.12186	0.546907	-0.27454	0.124323	0.0282715	0.602171	Meat_Potatoes_Gravy	871	871	0.0247565	0.537179	0.00227244	0.0615929	0.970578	0.970578	Meat_Potatoes_Gravy	99.912	39.5403	64.6989	263.596	0.0462375	-0.00503891	-0.108979	0.913219	0.938415	NS	NS	NS
P22_Peptidoglycan synthesis IV (Enterococcus faecium)	Coffee_milk_Soup	205	205	-0.0190486	0.599621	0.140314	0.127127	0.271043	0.938852	Coffee_milk_Soup	126	126	0.00261508	0.755444	0.0411063	0.134693	0.760753	0.961396	Coffee_milk_Soup	223	223	-0.00397076	0.684592	-0.091302	0.0948771	0.33696	0.834615	Coffee_milk_Soup	871	871	0.00528062	0.524601	0.0337971	0.0655018	0.606006	0.739658	Coffee_milk_Soup	61.8762	55.1204	111.091	233.074	0.0465665	0.0188271	0.404305	0.685988	0.940874	NS	NS	NS
P19_Biotin biosynthesis II (Bacillus subtilis)	Coffee_milk_Soup	205	205	-0.0190486	0.599621	-0.099461	0.116329	0.393583	0.938852	Coffee_milk_Soup	126	126	0.00261508	0.755444	0.167585	0.113338	0.14186	0.618084	Coffee_milk_Soup	223	223	-0.00397076	0.684592	-0.0657419	0.0984669	0.505063	0.834615	Coffee_milk_Soup	871	871	0.00528062	0.524601	0.0333211	0.0672445	0.620358	0.739658	Coffee_milk_Soup	73.896	77.8477	103.138	221.15	0.0458334	0.0132025	0.288055	0.773305	0.940874	NS	NS	NS
P23_L-glutamine synthesis	Coffee_milk_Soup	205	205	-0.0190486	0.599621	0.0633308	0.134301	0.637757	0.938852	Coffee_milk_Soup	126	126	0.00261508	0.755444	0.107079	0.126634	0.39947	0.770345	Coffee_milk_Soup	223	223	-0.00397076	0.684592	0.0184527	0.097603	0.850224	0.937088	Coffee_milk_Soup	871	871	0.00528062	0.524601	-0.0363524	0.0633823	0.566427	0.739658	Coffee_milk_Soup	55.4427	62.3588	104.972	248.922	0.0460436	0.00652256	0.141661	0.887348	0.940874	NS	NS	NS
P15_Methanogenesis	Coffee_milk_Soup	205	205	-0.0190486	0.599621	-0.0178319	0.0370461	0.630851	0.938852	Coffee_milk_Soup	126	126	0.00261508	0.755444	-0.00923403	0.0955196	0.923148	0.961838	Coffee_milk_Soup	223	223	-0.00397076	0.684592	0.0106726	0.0911118	0.906859	0.937088	Coffee_milk_Soup	871	871	0.00528062	0.524601	0.06959	0.0623154	0.264416	0.671999	Coffee_milk_Soup	728.643	109.601	120.462	257.519	0.0286743	0.00427656	0.149143	0.881441	0.940874	NS	NS	NS
P16_Bifidobacterium shunt	Coffee_milk_Soup	205	205	-0.0190486	0.599621	0.0532177	0.132822	0.689094	0.938852	Coffee_milk_Soup	126	126	0.00261508	0.755444	-0.0459431	0.127021	0.718215	0.961396	Coffee_milk_Soup	223	223	-0.00397076	0.684592	-0.015275	0.098824	0.877306	0.937088	Coffee_milk_Soup	871	871	0.00528062	0.524601	-0.00419644	0.0636513	0.94745	0.979032	Coffee_milk_Soup	56.6835	61.9797	102.394	246.823	0.0462309	-0.00519538	-0.112379	0.910523	0.940874	NS	NS	NS
P21_Glycogen degradation	Coffee_milk_Soup	205	205	-0.0190486	0.599621	0.0114909	0.157042	0.941744	0.985898	Coffee_milk_Soup	126	126	0.00261508	0.755444	0.180546	0.151549	0.235872	0.66473	Coffee_milk_Soup	223	223	-0.00397076	0.684592	-0.0465778	0.0901513	0.605918	0.834615	Coffee_milk_Soup	871	871	0.00528062	0.524601	-0.0201782	0.0579861	0.727938	0.805931	Coffee_milk_Soup	40.5481	43.5404	123.043	297.407	0.0445198	-0.00674913	-0.151598	0.879504	0.940874	NS	NS	NS
P13_Ferment. to butanoate	Coffee_milk_Soup	205	205	-0.0190486	0.599621	0.0709825	0.0869749	0.415404	0.938852	Coffee_milk_Soup	126	126	0.00261508	0.755444	0.0220483	0.0919217	0.810849	0.961396	Coffee_milk_Soup	223	223	-0.00397076	0.684592	0.0650525	0.0692408	0.348513	0.834615	Coffee_milk_Soup	871	871	0.00528062	0.524601	-0.0654933	0.0449907	0.145836	0.574454	Coffee_milk_Soup	132.194	118.349	208.582	494.032	0.0323905	-0.00712806	-0.220066	0.82582	0.940874	NS	NS	NS
P8_Creatinine degradation I	Coffee_milk_Soup	205	205	-0.0190486	0.599621	-0.0278154	0.109239	0.799272	0.985898	Coffee_milk_Soup	126	126	0.00261508	0.755444	-0.0893299	0.110977	0.422447	0.770345	Coffee_milk_Soup	223	223	-0.00397076	0.684592	0.0492597	0.0985551	0.617709	0.834615	Coffee_milk_Soup	871	871	0.00528062	0.524601	0.000878182	0.0670803	0.989558	0.989558	Coffee_milk_Soup	83.8004	81.1954	102.954	222.234	0.045167	-0.00880792	-0.195008	0.845387	0.940874	NS	NS	NS
P25_L-tyrosine synthesis	Coffee_milk_Soup	205	205	-0.0190486	0.599621	0.00222096	0.125498	0.985898	0.985898	Coffee_milk_Soup	126	126	0.00261508	0.755444	0.0798772	0.133977	0.552164	0.900899	Coffee_milk_Soup	223	223	-0.00397076	0.684592	0.0382908	0.0987785	0.69866	0.834615	Coffee_milk_Soup	871	871	0.00528062	0.524601	-0.0629543	0.0643505	0.328198	0.671999	Coffee_milk_Soup	63.4931	55.7108	102.488	241.488	0.0464649	-0.0144378	-0.310726	0.756009	0.940874	NS	NS	NS
P23_L-glutamine synthesis	Cheese_Butter	205	205	-0.0931494	0.425837	0.27109	0.173539	0.119846	0.371521	Cheese_Butter	126	126	-0.00880917	0.675371	0.0621485	0.140839	0.659809	0.88394	Cheese_Butter	223	223	-0.0538434	0.563146	0.0750315	0.120597	0.534486	0.932114	Cheese_Butter	871	871	0.0356952	0.679706	-0.051038	0.0494815	0.302615	0.569218	Cheese_Butter	33.2053	50.4142	68.7583	408.427	0.0422274	-0.00633277	-0.149968	0.880789	0.941534	NS	NS	NS
P8_Creatinine degradation I	Fruit_Juice_Milk	205	205	0.0499406	0.971662	0.00652819	0.0637621	0.918555	0.981904	Fruit_Juice_Milk	126	126	0.0470696	0.883709	0.0180595	0.111734	0.871869	0.993163	Fruit_Juice_Milk	223	223	-0.0460608	0.585582	-0.1066	0.118595	0.369726	0.976547	Fruit_Juice_Milk	871	871	-0.00752221	0.66348	0.0258903	0.0551609	0.638931	0.940602	Fruit_Juice_Milk	245.966	80.0993	71.0994	328.653	0.0371182	0.00548622	0.147804	0.882497	0.943359	NS	NS	NS
P10_FA and beta-oxidation	Fruit_Juice_Milk	205	205	0.0499406	0.971662	0.0336258	0.0356152	0.346248	0.670855	Fruit_Juice_Milk	126	126	0.0470696	0.883709	-0.0184203	0.0695755	0.791662	0.993163	Fruit_Juice_Milk	223	223	-0.0460608	0.585582	-0.0128839	0.0483683	0.790207	0.976547	Fruit_Juice_Milk	871	871	-0.00752221	0.66348	-0.0136458	0.021701	0.529641	0.940602	Fruit_Juice_Milk	788.369	206.579	427.444	2123.45	0.0167935	-0.00332193	-0.197811	0.843193	0.943359	NS	NS	NS
P24_L-phenylalanine synthesis	Fruit_Juice_Milk	205	205	0.0499406	0.971662	0.0500081	0.0672951	0.458287	0.702737	Fruit_Juice_Milk	126	126	0.0470696	0.883709	-0.00585826	0.129679	0.964043	0.993163	Fruit_Juice_Milk	223	223	-0.0460608	0.585582	0.0129887	0.111585	0.907442	0.976547	Fruit_Juice_Milk	871	871	-0.00752221	0.66348	-0.049351	0.054784	0.36793	0.940602	Fruit_Juice_Milk	220.817	59.4648	80.3132	333.191	0.0379653	-0.00678285	-0.178659	0.858205	0.943359	NS	NS	NS
P22_Peptidoglycan synthesis IV (Enterococcus faecium)	Fruit_Juice_Milk	205	205	0.0499406	0.971662	0.0439087	0.0743549	0.555506	0.731939	Fruit_Juice_Milk	126	126	0.0470696	0.883709	0.0584616	0.135208	0.66624	0.993163	Fruit_Juice_Milk	223	223	-0.0460608	0.585582	-0.0864654	0.114409	0.450614	0.976547	Fruit_Juice_Milk	871	871	-0.00752221	0.66348	-0.02728	0.05387	0.612702	0.940602	Fruit_Juice_Milk	180.876	54.7007	76.3976	344.593	0.0390266	-0.00741173	-0.189915	0.849376	0.943359	NS	NS	NS
P13_Ferment. to butanoate	Dairy_Cereals	205	205	-0.161259	0.558239	-0.050416	0.0917686	0.583359	0.856475	Dairy_Cereals	126	126	-0.0521211	0.621192	-0.196756	0.108357	0.0718976	0.445765	Dairy_Cereals	223	223	-0.0111794	0.671357	0.0319728	0.0745568	0.668467	0.850347	Dairy_Cereals	871	871	0.0462207	0.622802	-0.0350869	0.0387718	0.365739	0.944825	Dairy_Cereals	118.744	85.1691	179.898	665.226	0.0308748	-0.0384476	-1.24527	0.213031	0.943424	NS	NS	NS
P20_Terpenoid synthesis via mevalonate	Savoury_snacks	205	205	-0.0114351	0.501597	0.0705725	0.12731	0.579973	0.898958	Savoury_snacks	126	126	0.0331572	0.582506	0.0243538	0.147155	0.868831	0.960509	Savoury_snacks	223	223	-0.010086	0.411775	0.141231	0.156371	0.367433	0.711902	Savoury_snacks	871	871	0.000932337	0.495994	-0.0318717	0.0677749	0.638289	0.942412	Savoury_snacks	61.6982	46.1798	40.8967	217.702	0.0522369	0.0117775	0.225464	0.821618	0.945003	NS	NS	NS
P8_Creatinine degradation I	Savoury_snacks	205	205	-0.0114351	0.501597	0.0721827	0.124136	0.561576	0.898958	Savoury_snacks	126	126	0.0331572	0.582506	-0.117618	0.147375	0.426397	0.960509	Savoury_snacks	223	223	-0.010086	0.411775	-0.13417	0.166986	0.422576	0.770579	Savoury_snacks	871	871	0.000932337	0.495994	0.00852104	0.0750067	0.909578	0.942412	Savoury_snacks	64.8935	46.0416	35.8624	177.746	0.055509	-0.0124119	-0.223602	0.823067	0.945003	NS	NS	NS
P22_Peptidoglycan synthesis IV (Enterococcus faecium)	Pastry_Cream	205	205	-0.0651555	0.556024	-0.0294674	0.130397	0.821447	0.964115	Pastry_Cream	126	126	0.0592037	0.832987	-0.0279924	0.144179	0.846386	0.984894	Pastry_Cream	223	223	-0.0509842	0.476141	0.0288501	0.141014	0.838084	0.961045	Pastry_Cream	871	871	0.0200538	0.596495	0.015861	0.0606023	0.793597	0.966465	Pastry_Cream	58.8119	48.1059	50.2895	272.284	0.0482529	0.00626305	0.129796	0.896727	0.948383	NS	NS	NS
P21_Glycogen degradation	Pastry_Cream	205	205	-0.0651555	0.556024	-0.234096	0.159753	0.144402	0.953657	Pastry_Cream	126	126	0.0592037	0.832987	0.134982	0.162675	0.408322	0.984894	Pastry_Cream	223	223	-0.0509842	0.476141	0.190815	0.133172	0.15334	0.623928	Pastry_Cream	871	871	0.0200538	0.596495	-0.0128611	0.0536447	0.810584	0.966465	Pastry_Cream	39.1832	37.7882	56.3868	347.493	0.0456031	0.00461344	0.101165	0.919419	0.948383	NS	NS	NS
P5_Biotin and FA-synthesis (E. coli)	Pastry_Cream	205	205	-0.0651555	0.556024	0.0953309	0.104637	0.363364	0.953657	Pastry_Cream	126	126	0.0592037	0.832987	-0.0641687	0.117684	0.586584	0.984894	Pastry_Cream	223	223	-0.0509842	0.476141	0.0110957	0.126242	0.930044	0.961045	Pastry_Cream	871	871	0.0200538	0.596495	-0.00616736	0.0512464	0.904236	0.966597	Pastry_Cream	91.3337	72.205	62.7469	380.78	0.0405866	0.00398875	0.0982776	0.921712	0.948383	NS	NS	NS
P11_Mixed acid fermentation	Pastry_Cream	205	205	-0.0651555	0.556024	-0.229057	0.144334	0.114101	0.953657	Pastry_Cream	126	126	0.0592037	0.832987	0.0200726	0.147465	0.891956	0.984894	Pastry_Cream	223	223	-0.0509842	0.476141	0.087963	0.141542	0.534948	0.872811	Pastry_Cream	871	871	0.0200538	0.596495	0.0209916	0.0543615	0.699481	0.942779	Pastry_Cream	48.0025	45.9855	49.9146	338.389	0.045535	0.00294783	0.0647377	0.948383	0.948383	NS	NS	NS
P24_L-phenylalanine synthesis	Spreads_sweet	205	205	-0.0555374	0.536875	0.0362812	0.126069	0.773809	0.858992	Spreads_sweet	126	126	0.0129582	0.465282	-0.0727046	0.215093	0.735943	0.94189	Spreads_sweet	223	223	-0.0241369	0.470388	-0.0748752	0.143847	0.603233	0.965036	Spreads_sweet	871	871	0.0180257	0.519839	0.022494	0.068494	0.742683	0.822256	Spreads_sweet	62.919	21.6146	48.3276	213.155	0.0537591	0.0054548	0.101467	0.919179	0.949819	NS	NS	NS
P10_FA and beta-oxidation	Sweetened_tea_yoghurtdrink	205	205	0.111425	1.12755	0.0251664	0.0319253	0.431468	0.696408	Sweetened_tea_yoghurtdrink	126	126	0.0674218	0.540567	-0.00565376	0.0981363	0.954156	0.954156	Sweetened_tea_yoghurtdrink	223	223	0.00250442	0.480442	0.0150128	0.0571748	0.793127	0.99476	Sweetened_tea_yoghurtdrink	871	871	-0.0373747	0.434722	-0.0253794	0.0314104	0.419318	0.809487	Sweetened_tea_yoghurtdrink	981.14	103.834	305.908	1013.57	0.0203935	0.00123665	0.0606396	0.951646	0.951646	NS	NS	NS
P8_Creatinine degradation I	Vegetables_Fruit_Tea	205	205	-0.11222	0.77642	0.0652481	0.0790345	0.410039	0.711516	Vegetables_Fruit_Tea	126	126	-0.000156026	0.675955	0.0787888	0.129832	0.545097	0.861231	Vegetables_Fruit_Tea	223	223	0.0418139	0.681131	0.0191453	0.100749	0.849463	0.992246	Vegetables_Fruit_Tea	871	871	0.0161285	0.690431	-0.0501897	0.0505837	0.321372	0.498127	Vegetables_Fruit_Tea	160.091	59.3245	98.5189	390.821	0.0375623	-0.00368152	-0.0980112	0.921923	0.952654	NS	NS	NS
P11_Mixed acid fermentation	Rolls_Spreads	205	205	0.00970005	1.07387	0.158652	0.145413	0.276573	0.726473	Rolls_Spreads	126	126	0.0143831	0.689611	0.0261416	0.404751	0.94861	0.94861	Rolls_Spreads	223	223	-0.16152	0.433979	0.487341	0.327105	0.137712	0.835311	Rolls_Spreads	871	871	0.0374261	0.602796	-0.137644	0.122088	0.259878	0.908916	Rolls_Spreads	47.2925	6.10415	9.34602	67.0893	0.0877625	0.0229747	0.261783	0.793489	0.953021	NS	NS	NS
P5_Biotin and FA-synthesis (E. coli)	Rolls_Spreads	205	205	0.00970005	1.07387	0.000482688	0.10529	0.996347	0.996347	Rolls_Spreads	126	126	0.0143831	0.689611	-0.0378315	0.323371	0.907063	0.937298	Rolls_Spreads	223	223	-0.16152	0.433979	0.0940797	0.292909	0.748375	0.94514	Rolls_Spreads	871	871	0.0374261	0.602796	0.0421073	0.115159	0.714718	0.978707	Rolls_Spreads	90.2036	9.56308	11.6556	75.4063	0.0731608	0.0211609	0.289239	0.772399	0.953021	NS	NS	NS
P17_Polyamine synthesis	Rolls_Spreads	205	205	0.00970005	1.07387	-0.171491	0.133724	0.201187	0.726473	Rolls_Spreads	126	126	0.0143831	0.689611	0.264381	0.357391	0.460894	0.775689	Rolls_Spreads	223	223	-0.16152	0.433979	0.179912	0.317884	0.572001	0.939802	Rolls_Spreads	871	871	0.0374261	0.602796	0.153668	0.13838	0.267104	0.908916	Rolls_Spreads	55.9216	7.82912	9.89605	52.2217	0.0891336	0.0181541	0.203673	0.838609	0.953021	NS	NS	NS
P30_Mannan degradation	Rolls_Spreads	205	205	0.00970005	1.07387	0.154499	0.173744	0.374954	0.726473	Rolls_Spreads	126	126	0.0143831	0.689611	0.257885	0.408833	0.529382	0.775689	Rolls_Spreads	223	223	-0.16152	0.433979	0.367467	0.33923	0.279905	0.835311	Rolls_Spreads	871	871	0.0374261	0.602796	-0.104014	0.106519	0.329098	0.908916	Rolls_Spreads	33.1267	5.98286	8.68982	88.1352	0.0857699	0.00505301	0.0589135	0.953021	0.953021	NS	NS	NS
P4_Ferment. acetylene to acetate	Rolls_Spreads	205	205	0.00970005	1.07387	-0.0098951	0.0591813	0.867383	0.977096	Rolls_Spreads	126	126	0.0143831	0.689611	0.247283	0.158024	0.120254	0.588729	Rolls_Spreads	223	223	-0.16152	0.433979	-0.0409652	0.142769	0.774439	0.94514	Rolls_Spreads	871	871	0.0374261	0.602796	-0.00661832	0.0547552	0.903821	0.978707	Rolls_Spreads	285.516	40.0453	49.0604	333.541	0.037578	0.00403871	0.107475	0.914412	0.953021	NS	NS	NS
P10_FA and beta-oxidation	Rolls_Spreads	205	205	0.00970005	1.07387	0.0193573	0.0628252	0.75832	0.967716	Rolls_Spreads	126	126	0.0143831	0.689611	0.063819	0.204984	0.756094	0.895101	Rolls_Spreads	223	223	-0.16152	0.433979	0.179347	0.137664	0.194034	0.835311	Rolls_Spreads	871	871	0.0374261	0.602796	-0.0423954	0.0548528	0.439798	0.908916	Rolls_Spreads	253.357	23.7992	52.7668	332.355	0.0388579	0.0027124	0.069803	0.94435	0.953021	NS	NS	NS
P16_Bifidobacterium shunt	Rolls_Spreads	205	205	0.00970005	1.07387	0.0655425	0.136381	0.631341	0.967716	Rolls_Spreads	126	126	0.0143831	0.689611	-0.383442	0.371641	0.304262	0.775689	Rolls_Spreads	223	223	-0.16152	0.433979	0.032063	0.340188	0.924997	0.95583	Rolls_Spreads	871	871	0.0374261	0.602796	-0.0343807	0.132325	0.795064	0.978707	Rolls_Spreads	53.7639	7.24025	8.64097	57.1106	0.0888211	-0.00740668	-0.0833888	0.933542	0.953021	NS	NS	NS
P6_Ferment. glutamate and pyruvate	Rolls_Spreads	205	205	0.00970005	1.07387	-0.0743452	0.116869	0.525416	0.904884	Rolls_Spreads	126	126	0.0143831	0.689611	-0.613848	0.357009	0.0881161	0.588729	Rolls_Spreads	223	223	-0.16152	0.433979	-0.0390451	0.301923	0.897223	0.95583	Rolls_Spreads	871	871	0.0374261	0.602796	0.100118	0.108403	0.355968	0.908916	Rolls_Spreads	73.2149	7.84589	10.97	85.0977	0.0751373	-0.0122391	-0.16289	0.870605	0.953021	NS	NS	NS
P20_Terpenoid synthesis via mevalonate	Spreads_sweet	205	205	-0.0555374	0.536875	0.24041	0.121162	0.0486065	0.453079	Spreads_sweet	126	126	0.0129582	0.465282	-0.0875249	0.184516	0.636113	0.94189	Spreads_sweet	223	223	-0.0241369	0.470388	0.226602	0.142746	0.113869	0.882482	Spreads_sweet	871	871	0.0180257	0.519839	-0.092043	0.0622275	0.139468	0.288234	Spreads_sweet	68.1192	29.3719	49.076	258.247	0.0497018	0.00285732	0.0574893	0.954155	0.954155	NS	NS	NS
P31_Anhydromuropeptides recycling	Coffee_milk_Soup	205	205	-0.0190486	0.599621	0.0871288	0.0985368	0.377641	0.938852	Coffee_milk_Soup	126	126	0.00261508	0.755444	0.105251	0.119116	0.378677	0.770345	Coffee_milk_Soup	223	223	-0.00397076	0.684592	0.00124866	0.0982657	0.989873	0.989873	Coffee_milk_Soup	871	871	0.00528062	0.524601	-0.0689966	0.0672692	0.305329	0.671999	Coffee_milk_Soup	102.992	70.4795	103.561	220.988	0.0448102	0.00255716	0.0570665	0.954492	0.954492	NS	NS	NS
P16_Bifidobacterium shunt	Vegetables_Fruit_Tea	205	205	-0.11222	0.77642	0.0528257	0.096212	0.583583	0.795183	Vegetables_Fruit_Tea	126	126	-0.000156026	0.675955	-0.062745	0.1484	0.673191	0.861231	Vegetables_Fruit_Tea	223	223	0.0418139	0.681131	0.0669845	0.100877	0.507382	0.992246	Vegetables_Fruit_Tea	871	871	0.0161285	0.690431	-0.0251922	0.0480178	0.599966	0.808649	Vegetables_Fruit_Tea	108.029	45.408	98.2685	433.706	0.0381966	-0.00216797	-0.0567582	0.954738	0.954738	NS	NS	NS
P23_L-glutamine synthesis	Dairy_lf	205	205	-0.0789894	0.503158	0.236792	0.148045	0.111306	0.964834	Dairy_lf	126	126	-0.0346258	0.518191	-0.0993074	0.182354	0.58705	0.791241	Dairy_lf	223	223	0.0070026	0.453292	-0.142173	0.144485	0.32621	0.79612	Dairy_lf	871	871	0.0221807	0.682257	0.0509195	0.0479914	0.288981	0.882381	Dairy_lf	45.6259	30.0724	47.9022	434.183	0.0423416	0.0414415	0.978741	0.327708	0.957599	NS	NS	NS
P21_Glycogen degradation	Dairy_lf	205	205	-0.0789894	0.503158	-0.158839	0.173763	0.361767	0.966242	Dairy_lf	126	126	-0.0346258	0.518191	-0.517902	0.213977	0.0170041	0.263564	Dairy_lf	223	223	0.0070026	0.453292	0.10276	0.133641	0.442771	0.79612	Dairy_lf	871	871	0.0221807	0.682257	0.0690487	0.0438661	0.115834	0.882381	Dairy_lf	33.1194	21.8406	55.9916	519.688	0.0398207	0.0397463	0.99813	0.318216	0.957599	NS	NS	NS
P29_DMK synthesis	Dairy_lf	205	205	-0.0789894	0.503158	0.142287	0.107399	0.186742	0.964834	Dairy_lf	126	126	-0.0346258	0.518191	0.114032	0.125029	0.363575	0.626158	Dairy_lf	223	223	0.0070026	0.453292	-0.0847029	0.103777	0.415279	0.79612	Dairy_lf	871	871	0.0221807	0.682257	0.0257231	0.0352086	0.465227	0.882381	Dairy_lf	86.6957	63.9703	92.8539	806.681	0.0308577	0.0309614	1.00336	0.315688	0.957599	NS	NS	NS
P16_Bifidobacterium shunt	Dairy_lf	205	205	-0.0789894	0.503158	-0.0602108	0.147269	0.683091	0.966242	Dairy_lf	126	126	-0.0346258	0.518191	-0.0293312	0.182674	0.872705	0.976588	Dairy_lf	223	223	0.0070026	0.453292	0.153665	0.146243	0.29454	0.79612	Dairy_lf	871	871	0.0221807	0.682257	0.0298321	0.0482067	0.536187	0.882381	Dairy_lf	46.1079	29.9673	46.7575	430.313	0.0425187	0.0295889	0.695903	0.486489	0.957599	NS	NS	NS
P14_Sucrose degradation, heme synthesis (aerobic)	Dairy_lf	205	205	-0.0789894	0.503158	-0.0226161	0.116878	0.846764	0.966242	Dairy_lf	126	126	-0.0346258	0.518191	-0.186217	0.155654	0.233917	0.604286	Dairy_lf	223	223	0.0070026	0.453292	0.00596803	0.112165	0.957616	0.970682	Dairy_lf	871	871	0.0221807	0.682257	0.0490776	0.0381134	0.198205	0.882381	Dairy_lf	73.2037	41.2745	79.4846	688.404	0.0336647	0.0282399	0.838858	0.401549	0.957599	NS	NS	NS
P1_AA-synthesis and starch degradation	Dairy_lf	205	205	-0.0789894	0.503158	0.125833	0.143269	0.380846	0.966242	Dairy_lf	126	126	-0.0346258	0.518191	-0.249861	0.171845	0.148559	0.460534	Dairy_lf	223	223	0.0070026	0.453292	-0.0845504	0.145701	0.562315	0.79612	Dairy_lf	871	871	0.0221807	0.682257	0.0440036	0.0456852	0.335721	0.882381	Dairy_lf	48.719	33.8631	47.1057	479.126	0.0405282	0.02426	0.598595	0.549443	0.957599	NS	NS	NS
P6_Ferment. glutamate and pyruvate	Dairy_lf	205	205	-0.0789894	0.503158	-0.0721112	0.126204	0.568383	0.966242	Dairy_lf	126	126	-0.0346258	0.518191	0.28847	0.174895	0.101684	0.460534	Dairy_lf	223	223	0.0070026	0.453292	-0.0769763	0.13002	0.554445	0.79612	Dairy_lf	871	871	0.0221807	0.682257	0.0259986	0.0395086	0.510683	0.882381	Dairy_lf	62.7846	32.6922	59.1531	640.643	0.0354603	0.0213834	0.603025	0.546492	0.957599	NS	NS	NS
P8_Creatinine degradation I	Dairy_lf	205	205	-0.0789894	0.503158	-0.0378553	0.121112	0.75494	0.966242	Dairy_lf	126	126	-0.0346258	0.518191	0.087172	0.159763	0.586331	0.791241	Dairy_lf	223	223	0.0070026	0.453292	-0.0663578	0.146222	0.650416	0.84012	Dairy_lf	871	871	0.0221807	0.682257	0.0324797	0.0508028	0.522778	0.882381	Dairy_lf	68.1745	39.1784	46.7706	387.458	0.0429703	0.0190468	0.443256	0.65758	0.957599	NS	NS	NS
P18_Formaldehyde assimilation	Dairy_lf	205	205	-0.0789894	0.503158	0.201282	0.140335	0.153055	0.964834	Dairy_lf	126	126	-0.0346258	0.518191	-0.169948	0.167705	0.312922	0.606286	Dairy_lf	223	223	0.0070026	0.453292	0.17887	0.132448	0.178264	0.79612	Dairy_lf	871	871	0.0221807	0.682257	-0.00253213	0.0418085	0.95172	0.989143	Dairy_lf	50.7773	35.5555	57.0049	572.099	0.0373865	0.018067	0.483251	0.628917	0.957599	NS	NS	NS
P5_Biotin and FA-synthesis (E. coli)	Dairy_lf	205	205	-0.0789894	0.503158	-0.165952	0.113068	0.143759	0.964834	Dairy_lf	126	126	-0.0346258	0.518191	0.310416	0.155716	0.0484776	0.460534	Dairy_lf	223	223	0.0070026	0.453292	0.0860569	0.12613	0.495786	0.79612	Dairy_lf	871	871	0.0221807	0.682257	0.00286499	0.0419637	0.945584	0.989143	Dairy_lf	78.2211	41.2414	62.858	567.874	0.0365101	0.00914082	0.250364	0.802306	0.957599	NS	NS	NS
P20_Terpenoid synthesis via mevalonate	Dairy_lf	205	205	-0.0789894	0.503158	0.095142	0.124047	0.443999	0.966242	Dairy_lf	126	126	-0.0346258	0.518191	0.0220353	0.159305	0.890218	0.976588	Dairy_lf	223	223	0.0070026	0.453292	-0.0171239	0.137041	0.900675	0.970682	Dairy_lf	871	871	0.0221807	0.682257	-0.0015994	0.045921	0.972224	0.989143	Dairy_lf	64.9874	39.4042	53.2478	474.216	0.0397824	0.00851625	0.214071	0.830492	0.957599	NS	NS	NS
P11_Mixed acid fermentation	Dairy_lf	205	205	-0.0789894	0.503158	0.0473267	0.15743	0.764018	0.966242	Dairy_lf	126	126	-0.0346258	0.518191	-0.308919	0.196079	0.117778	0.460534	Dairy_lf	223	223	0.0070026	0.453292	-0.0052136	0.141692	0.970682	0.970682	Dairy_lf	871	871	0.0221807	0.682257	0.0199787	0.044513	0.653668	0.984643	Dairy_lf	40.3481	26.0098	49.8094	504.691	0.0401332	0.00595626	0.148412	0.882017	0.957599	NS	NS	NS
P24_L-phenylalanine synthesis	Dairy_lf	205	205	-0.0789894	0.503158	0.10515	0.127811	0.411665	0.966242	Dairy_lf	126	126	-0.0346258	0.518191	0.0340346	0.185607	0.854818	0.976588	Dairy_lf	223	223	0.0070026	0.453292	-0.00635365	0.137393	0.963158	0.970682	Dairy_lf	871	871	0.0221807	0.682257	-0.0106646	0.0504835	0.832743	0.989143	Dairy_lf	61.2155	29.0276	52.9753	392.375	0.0432098	0.00542139	0.125467	0.900154	0.957599	NS	NS	NS
P3_AA-synthesis	Dairy_lf	205	205	-0.0789894	0.503158	0.0418452	0.10687	0.695807	0.966242	Dairy_lf	126	126	-0.0346258	0.518191	-0.215813	0.118371	0.0707638	0.460534	Dairy_lf	223	223	0.0070026	0.453292	-0.0912244	0.107836	0.398511	0.79612	Dairy_lf	871	871	0.0221807	0.682257	0.0258567	0.0336827	0.442901	0.882381	Dairy_lf	87.557	71.3686	85.9945	881.427	0.0297964	0.00284773	0.0955731	0.92386	0.957599	NS	NS	NS
P2_Aerobic respiration, ECA-, LPS-, heme-synthesis	Dairy_lf	205	205	-0.0789894	0.503158	-0.0462355	0.0998354	0.643787	0.966242	Dairy_lf	126	126	-0.0346258	0.518191	0.0556121	0.0738415	0.452899	0.73894	Dairy_lf	223	223	0.0070026	0.453292	0.0761535	0.0786765	0.334155	0.79612	Dairy_lf	871	871	0.0221807	0.682257	-0.0143564	0.0234648	0.540814	0.882381	Dairy_lf	100.33	183.4	161.551	1816.21	0.0210282	-0.0036308	-0.172663	0.862916	0.957599	NS	NS	NS
P28_UTP and CTP degradation	Dairy_lf	205	205	-0.0789894	0.503158	-0.324518	0.160462	0.0444742	0.964834	Dairy_lf	126	126	-0.0346258	0.518191	-0.235897	0.169364	0.166243	0.468502	Dairy_lf	223	223	0.0070026	0.453292	0.164315	0.135493	0.226555	0.79612	Dairy_lf	871	871	0.0221807	0.682257	0.0193361	0.0449265	0.667017	0.984643	Dairy_lf	38.8378	34.8625	54.4711	495.444	0.0400444	-0.00368355	-0.0919866	0.926709	0.957599	NS	NS	NS
P10_FA and beta-oxidation	Dairy_lf	205	205	-0.0789894	0.503158	-0.0171095	0.0678332	0.801126	0.966242	Dairy_lf	126	126	-0.0346258	0.518191	0.0634875	0.0991599	0.523249	0.791241	Dairy_lf	223	223	0.0070026	0.453292	-0.0392037	0.0595798	0.511237	0.79612	Dairy_lf	871	871	0.0221807	0.682257	-0.00444758	0.0198416	0.822691	0.989143	Dairy_lf	217.328	101.702	281.71	2540.06	0.0178435	-0.00624133	-0.349782	0.726502	0.957599	NS	NS	NS
P9_Enterobactin-, LPS-, quinone-synthesis (E.coli)	Dairy_lf	205	205	-0.0789894	0.503158	-0.0290114	0.125778	0.817819	0.966242	Dairy_lf	126	126	-0.0346258	0.518191	0.195917	0.130091	0.134693	0.460534	Dairy_lf	223	223	0.0070026	0.453292	0.102646	0.116422	0.378932	0.79612	Dairy_lf	871	871	0.0221807	0.682257	-0.0320311	0.036497	0.380385	0.882381	Dairy_lf	63.2112	59.0892	73.778	750.733	0.0324989	-0.00710918	-0.218752	0.826844	0.957599	NS	NS	NS
P4_Ferment. acetylene to acetate	Dairy_lf	205	205	-0.0789894	0.503158	-0.00307907	0.0638999	0.961617	0.99367	Dairy_lf	126	126	-0.0346258	0.518191	-0.00315971	0.0781249	0.967806	0.98991	Dairy_lf	223	223	0.0070026	0.453292	-0.140646	0.0614755	0.0231148	0.634608	Dairy_lf	871	871	0.0221807	0.682257	0.00675759	0.0207031	0.744197	0.989143	Dairy_lf	244.906	163.84	264.603	2333.07	0.0182379	-0.00755756	-0.414388	0.67859	0.957599	NS	NS	NS
P7_Colanic acid building blocks synthesis	Dairy_lf	205	205	-0.0789894	0.503158	-0.0472204	0.105206	0.654039	0.966242	Dairy_lf	126	126	-0.0346258	0.518191	0.25544	0.159769	0.112494	0.460534	Dairy_lf	223	223	0.0070026	0.453292	-0.135977	0.107381	0.206762	0.79612	Dairy_lf	871	871	0.0221807	0.682257	-0.00143404	0.0401374	0.971507	0.989143	Dairy_lf	90.3473	39.1754	86.7247	620.727	0.0345656	-0.00829415	-0.239954	0.810366	0.957599	NS	NS	NS
P13_Ferment. to butanoate	Dairy_lf	205	205	-0.0789894	0.503158	0.135387	0.0961199	0.160538	0.964834	Dairy_lf	126	126	-0.0346258	0.518191	0.34408	0.128384	0.00839481	0.260239	Dairy_lf	223	223	0.0070026	0.453292	-0.0180994	0.102921	0.86057	0.970682	Dairy_lf	871	871	0.0221807	0.682257	-0.0534672	0.0340747	0.116986	0.882381	Dairy_lf	108.237	60.671	94.4049	861.264	0.0298199	-0.010874	-0.364656	0.715368	0.957599	NS	NS	NS
P12_Ferment. pyruvate and glycerol	Dairy_lf	205	205	-0.0789894	0.503158	0.0592007	0.0828384	0.475665	0.966242	Dairy_lf	126	126	-0.0346258	0.518191	-0.133898	0.0855743	0.120288	0.460534	Dairy_lf	223	223	0.0070026	0.453292	-0.133887	0.0651081	0.0409425	0.634608	Dairy_lf	871	871	0.0221807	0.682257	-0.00456327	0.0203607	0.822715	0.989143	Dairy_lf	145.726	136.557	235.901	2412.21	0.018473	-0.0178301	-0.965198	0.334446	0.957599	NS	NS	NS
P19_Biotin biosynthesis II (Bacillus subtilis)	Dairy_lf	205	205	-0.0789894	0.503158	-0.114771	0.128965	0.374573	0.966242	Dairy_lf	126	126	-0.0346258	0.518191	-0.171225	0.163658	0.297554	0.606286	Dairy_lf	223	223	0.0070026	0.453292	0.0787265	0.146129	0.590613	0.79612	Dairy_lf	871	871	0.0221807	0.682257	-0.000693484	0.0509464	0.989143	0.989143	Dairy_lf	60.1254	37.3358	46.8305	385.277	0.0434549	-0.0186451	-0.429067	0.667874	0.957599	NS	NS	NS
P25_L-tyrosine synthesis	Dairy_lf	205	205	-0.0789894	0.503158	-0.0223173	0.139142	0.872734	0.966242	Dairy_lf	126	126	-0.0346258	0.518191	-0.00244424	0.192878	0.98991	0.98991	Dairy_lf	223	223	0.0070026	0.453292	0.0952615	0.146447	0.516067	0.79612	Dairy_lf	871	871	0.0221807	0.682257	-0.0359199	0.0487586	0.461511	0.882381	Dairy_lf	51.6519	26.8803	46.6272	420.628	0.0428044	-0.0217769	-0.508755	0.610924	0.957599	NS	NS	NS
P26_Thiamin synthesis	Dairy_lf	205	205	-0.0789894	0.503158	0.036622	0.144347	0.799983	0.966242	Dairy_lf	126	126	-0.0346258	0.518191	0.209745	0.191606	0.275854	0.606286	Dairy_lf	223	223	0.0070026	0.453292	0.0227293	0.139054	0.870311	0.970682	Dairy_lf	871	871	0.0221807	0.682257	-0.0513105	0.0481653	0.287037	0.882381	Dairy_lf	47.9939	27.2385	51.7172	431.055	0.0423332	-0.0241421	-0.570286	0.568484	0.957599	NS	NS	NS
P15_Methanogenesis	Dairy_lf	205	205	-0.0789894	0.503158	-0.0272139	0.0424387	0.522166	0.966242	Dairy_lf	126	126	-0.0346258	0.518191	0.0149323	0.137309	0.913583	0.976588	Dairy_lf	223	223	0.0070026	0.453292	0.144618	0.134813	0.284582	0.79612	Dairy_lf	871	871	0.0221807	0.682257	-0.0532492	0.0472046	0.259611	0.882381	Dairy_lf	555.233	53.0398	55.0224	448.778	0.029987	-0.0272085	-0.907344	0.364225	0.957599	NS	NS	NS
P31_Anhydromuropeptides recycling	Dairy_lf	205	205	-0.0789894	0.503158	-0.0257794	0.109455	0.814044	0.966242	Dairy_lf	126	126	-0.0346258	0.518191	0.180409	0.170995	0.29352	0.606286	Dairy_lf	223	223	0.0070026	0.453292	0.00574643	0.145778	0.968592	0.970682	Dairy_lf	871	871	0.0221807	0.682257	-0.0504254	0.05096	0.322691	0.882381	Dairy_lf	83.4691	34.2006	47.0563	385.071	0.042648	-0.0275168	-0.645207	0.518793	0.957599	NS	NS	NS
P17_Polyamine synthesis	Dairy_lf	205	205	-0.0789894	0.503158	0.00845842	0.144971	0.953532	0.99367	Dairy_lf	126	126	-0.0346258	0.518191	-0.165301	0.174662	0.345846	0.626158	Dairy_lf	223	223	0.0070026	0.453292	0.215743	0.136316	0.114954	0.79612	Dairy_lf	871	871	0.0221807	0.682257	-0.0617261	0.0504143	0.221143	0.882381	Dairy_lf	47.5813	32.7795	53.8155	393.453	0.0435347	-0.0335312	-0.770217	0.441171	0.957599	NS	NS	NS
P30_Mannan degradation	Dairy_lf	205	205	-0.0789894	0.503158	-0.179859	0.187525	0.338661	0.966242	Dairy_lf	126	126	-0.0346258	0.518191	-0.117015	0.200138	0.559864	0.791241	Dairy_lf	223	223	0.0070026	0.453292	0.103069	0.146426	0.482252	0.79612	Dairy_lf	871	871	0.0221807	0.682257	-0.0378418	0.0388125	0.329838	0.882381	Dairy_lf	28.4369	24.9656	46.6403	663.83	0.0361817	-0.0371126	-1.02573	0.30502	0.957599	NS	NS	NS
P22_Peptidoglycan synthesis IV (Enterococcus faecium)	Dairy_lf	205	205	-0.0789894	0.503158	0.000601876	0.141388	0.996608	0.996608	Dairy_lf	126	126	-0.0346258	0.518191	-0.0334732	0.193673	0.863073	0.976588	Dairy_lf	223	223	0.0070026	0.453292	0.0759286	0.140957	0.59067	0.79612	Dairy_lf	871	871	0.0221807	0.682257	-0.0884537	0.0495354	0.0745039	0.882381	Dairy_lf	50.0239	26.6601	50.3301	407.538	0.0432519	-0.0619005	-1.43116	0.152384	0.957599	NS	NS	NS
P5_Biotin and FA-synthesis (E. coli)	Porridge_ready_Fish_fried_Chocolatemilk	205	205	0.0773975	0.762121	0.0664073	0.0751442	0.377908	0.68885	Porridge_ready_Fish_fried_Chocolatemilk	126	126	0.129518	0.829902	-0.0469635	0.101528	0.644512	0.975487	Porridge_ready_Fish_fried_Chocolatemilk	223	223	-0.0295003	0.594099	-0.131772	0.0984778	0.182269	0.608375	Porridge_ready_Fish_fried_Chocolatemilk	871	871	-0.0289628	0.569582	0.0335784	0.0510826	0.51114	0.833965	Porridge_ready_Fish_fried_Chocolatemilk	177.096	97.0132	103.115	383.225	0.0362631	0.00852762	0.23516	0.814085	0.959742	NS	NS	NS
P17_Polyamine synthesis	Porridge_ready_Fish_fried_Chocolatemilk	205	205	0.0773975	0.762121	0.00640505	0.0960175	0.946882	0.978445	Porridge_ready_Fish_fried_Chocolatemilk	126	126	0.129518	0.829902	0.123457	0.111993	0.272508	0.975487	Porridge_ready_Fish_fried_Chocolatemilk	223	223	-0.0295003	0.594099	-0.0573381	0.107298	0.593624	0.805783	Porridge_ready_Fish_fried_Chocolatemilk	871	871	-0.0289628	0.569582	-0.00774076	0.0614372	0.899766	0.964667	Porridge_ready_Fish_fried_Chocolatemilk	108.468	79.73	86.8598	264.933	0.0430335	0.00649419	0.15091	0.880047	0.959742	NS	NS	NS
P28_UTP and CTP degradation	Porridge_ready_Fish_fried_Chocolatemilk	205	205	0.0773975	0.762121	-0.0265431	0.107348	0.80496	0.937806	Porridge_ready_Fish_fried_Chocolatemilk	126	126	0.129518	0.829902	-0.0835929	0.109348	0.446091	0.975487	Porridge_ready_Fish_fried_Chocolatemilk	223	223	-0.0295003	0.594099	0.0946393	0.106275	0.374175	0.648464	Porridge_ready_Fish_fried_Chocolatemilk	871	871	-0.0289628	0.569582	-0.00377571	0.0547084	0.944994	0.964667	Porridge_ready_Fish_fried_Chocolatemilk	86.7786	83.6328	88.5403	334.112	0.0410629	-0.00367009	-0.0893772	0.928782	0.959742	NS	NS	NS
P25_L-tyrosine synthesis	Porridge_ready_Fish_fried_Chocolatemilk	205	205	0.0773975	0.762121	-0.156843	0.0914894	0.0880244	0.389822	Porridge_ready_Fish_fried_Chocolatemilk	126	126	0.129518	0.829902	0.0432754	0.123773	0.727225	0.975487	Porridge_ready_Fish_fried_Chocolatemilk	223	223	-0.0295003	0.594099	0.168425	0.114229	0.141809	0.551215	Porridge_ready_Fish_fried_Chocolatemilk	871	871	-0.0289628	0.569582	0.00263148	0.0593872	0.964667	0.964667	Porridge_ready_Fish_fried_Chocolatemilk	119.47	65.2752	76.6385	283.54	0.0428383	-0.00414599	-0.0967823	0.922899	0.959742	NS	NS	NS
P21_Glycogen degradation	Porridge_ready_Fish_fried_Chocolatemilk	205	205	0.0773975	0.762121	0.0165484	0.115323	0.886043	0.94715	Porridge_ready_Fish_fried_Chocolatemilk	126	126	0.129518	0.829902	0.00236629	0.140696	0.986609	0.986609	Porridge_ready_Fish_fried_Chocolatemilk	223	223	-0.0295003	0.594099	0.160393	0.104234	0.125317	0.551215	Porridge_ready_Fish_fried_Chocolatemilk	871	871	-0.0289628	0.569582	-0.0533252	0.0534572	0.318786	0.760182	Porridge_ready_Fish_fried_Chocolatemilk	75.1915	50.517	92.0404	349.935	0.0419708	-0.00446353	-0.106348	0.915306	0.959742	NS	NS	NS
P31_Anhydromuropeptides recycling	Porridge_ready_Fish_fried_Chocolatemilk	205	205	0.0773975	0.762121	-0.0140019	0.0724981	0.84705	0.937806	Porridge_ready_Fish_fried_Chocolatemilk	126	126	0.129518	0.829902	-0.0483515	0.110206	0.661639	0.975487	Porridge_ready_Fish_fried_Chocolatemilk	223	223	-0.0295003	0.594099	0.0849243	0.114019	0.457182	0.708632	Porridge_ready_Fish_fried_Chocolatemilk	871	871	-0.0289628	0.569582	-0.0172081	0.0620815	0.781703	0.964667	Porridge_ready_Fish_fried_Chocolatemilk	190.26	82.3367	76.9216	259.463	0.0405227	-0.00751661	-0.185491	0.852844	0.959742	NS	NS	NS
P26_Thiamin synthesis	Cheese_Butter	205	205	-0.0931494	0.425837	0.0177335	0.169176	0.916622	0.951363	Cheese_Butter	126	126	-0.00880917	0.675371	0.167053	0.147874	0.260858	0.88394	Cheese_Butter	223	223	-0.0538434	0.563146	0.198161	0.115133	0.0866499	0.932114	Cheese_Butter	871	871	0.0356952	0.679706	-0.0530303	0.0496588	0.285866	0.569218	Cheese_Butter	34.9398	45.7314	75.4395	405.516	0.0421965	0.00303348	0.0718894	0.94269	0.960756	NS	NS	NS
P27_dTTP synthesis	Cheese_Butter	205	205	-0.0931494	0.425837	0.417454	0.181798	0.0227025	0.34038	Cheese_Butter	126	126	-0.00880917	0.675371	-0.155523	0.142997	0.278952	0.88394	Cheese_Butter	223	223	-0.0538434	0.563146	-0.00326484	0.117826	0.97792	0.97792	Cheese_Butter	871	871	0.0356952	0.679706	-0.00886381	0.0494467	0.857776	0.984854	Cheese_Butter	30.2568	48.9043	72.0304	409.002	0.0422504	0.00207893	0.049205	0.960756	0.960756	NS	NS	NS
P20_Terpenoid synthesis via mevalonate	Fastfood	205	205	0.059247	0.613728	-0.124343	0.150177	0.408673	0.991927	Fastfood	126	126	0.0181697	0.719587	0.212993	0.197843	0.283831	0.776232	Fastfood	223	223	-0.0641103	0.381483	0.0552454	0.215669	0.798071	0.918106	Fastfood	871	871	8.79047e-06	0.532809	-0.00077474	0.0868168	0.992882	0.992882	Fastfood	44.34	25.548	21.4993	132.676	0.0668059	0.00452152	0.0676814	0.946039	0.962822	NS	NS	NS
P9_Enterobactin-, LPS-, quinone-synthesis (E.coli)	Fastfood	205	205	0.059247	0.613728	0.0202545	0.152323	0.894351	0.991927	Fastfood	126	126	0.0181697	0.719587	-0.0606953	0.16376	0.711562	0.945591	Fastfood	223	223	-0.0641103	0.381483	-0.291507	0.1825	0.111655	0.357636	Fastfood	871	871	8.79047e-06	0.532809	0.0547637	0.0690056	0.427639	0.797918	Fastfood	43.0995	37.2892	30.0243	210.006	0.0558651	0.00423848	0.0758698	0.939523	0.962822	NS	NS	NS
P8_Creatinine degradation I	Fastfood	205	205	0.059247	0.613728	0.0158495	0.146692	0.914068	0.991927	Fastfood	126	126	0.0181697	0.719587	-0.133475	0.199227	0.504167	0.907617	Fastfood	223	223	-0.0641103	0.381483	0.151767	0.230024	0.51009	0.777859	Fastfood	871	871	8.79047e-06	0.532809	-0.0083016	0.0960683	0.931158	0.978988	Fastfood	46.4718	25.1943	18.8997	108.353	0.0709027	-0.00330498	-0.0466129	0.962822	0.962822	NS	NS	NS
P16_Bifidobacterium shunt	Fastfood	205	205	0.059247	0.613728	-0.274459	0.177345	0.123308	0.991927	Fastfood	126	126	0.0181697	0.719587	0.370323	0.225444	0.103076	0.532561	Fastfood	223	223	-0.0641103	0.381483	-0.230948	0.230229	0.31692	0.546882	Fastfood	871	871	8.79047e-06	0.532809	0.0373532	0.0911493	0.682053	0.880985	Fastfood	31.7952	19.6753	18.8659	120.363	0.0724145	-0.00682427	-0.0942391	0.924919	0.962822	NS	NS	NS
P2_Aerobic respiration, ECA-, LPS-, heme-synthesis	Fastfood	205	205	0.059247	0.613728	-0.137755	0.120565	0.254587	0.991927	Fastfood	126	126	0.0181697	0.719587	-0.0240636	0.0929547	0.796191	0.964171	Fastfood	223	223	-0.0641103	0.381483	-0.255215	0.122884	0.0389904	0.241741	Fastfood	871	871	8.79047e-06	0.532809	0.0462474	0.0443435	0.297269	0.697171	Fastfood	68.7952	115.733	66.2231	508.558	0.0362903	-0.00743232	-0.204802	0.837727	0.962822	NS	NS	NS
P12_Ferment. pyruvate and glycerol	Fastfood	205	205	0.059247	0.613728	0.0183873	0.100656	0.85524	0.991927	Fastfood	126	126	0.0181697	0.719587	-0.00559986	0.107862	0.958681	0.966368	Fastfood	223	223	-0.0641103	0.381483	0.10342	0.103232	0.317544	0.546882	Fastfood	871	871	8.79047e-06	0.532809	-0.0284487	0.0384757	0.45987	0.797918	Fastfood	98.7009	85.9531	93.8371	675.502	0.0323763	-0.00857341	-0.264805	0.79116	0.962822	NS	NS	NS
P25_L-tyrosine synthesis	Fastfood	205	205	0.059247	0.613728	-0.0584476	0.168452	0.728981	0.991927	Fastfood	126	126	0.0181697	0.719587	0.0825516	0.240556	0.732071	0.945591	Fastfood	223	223	-0.0641103	0.381483	0.0399018	0.230708	0.862849	0.955297	Fastfood	871	871	8.79047e-06	0.532809	-0.0193573	0.0922078	0.833771	0.978988	Fastfood	35.241	17.281	18.7878	117.615	0.0727537	-0.0114343	-0.157165	0.875115	0.962822	NS	NS	NS
P27_dTTP synthesis	Fastfood	205	205	0.059247	0.613728	-0.00192815	0.190333	0.991927	0.991927	Fastfood	126	126	0.0181697	0.719587	0.084885	0.232132	0.715252	0.945591	Fastfood	223	223	-0.0641103	0.381483	-0.25566	0.221805	0.250327	0.517343	Fastfood	871	871	8.79047e-06	0.532809	0.0100756	0.0906714	0.911546	0.978988	Fastfood	27.6039	18.5579	20.3263	121.635	0.0729086	-0.0130182	-0.178555	0.858287	0.962822	NS	NS	NS
P21_Glycogen degradation	Fastfood	205	205	0.059247	0.613728	-0.240655	0.210167	0.253558	0.991927	Fastfood	126	126	0.0181697	0.719587	-0.548735	0.268813	0.0434116	0.52958	Fastfood	223	223	-0.0641103	0.381483	0.0275648	0.210621	0.895996	0.957789	Fastfood	871	871	8.79047e-06	0.532809	0.0541084	0.08303	0.514786	0.797918	Fastfood	22.6397	13.8388	22.5423	145.054	0.0700012	-0.0224044	-0.320057	0.748925	0.962822	NS	NS	NS
P29_DMK synthesis	Eggs_Alcoholic_drinks	205	205	-0.104303	0.43925	0.0106362	0.127573	0.933638	0.933638	Eggs_Alcoholic_drinks	126	126	-0.134042	0.302491	-0.0310644	0.22973	0.892663	0.922419	Eggs_Alcoholic_drinks	223	223	-0.0546888	0.448173	0.0533337	0.106667	0.617582	0.873112	Eggs_Alcoholic_drinks	871	871	0.0583724	0.606478	-0.00095377	0.0432524	0.982412	0.989758	Eggs_Alcoholic_drinks	61.4447	18.9481	87.8896	534.539	0.0377205	0.00603649	0.160032	0.872856	0.966376	NS	NS	NS
P24_L-phenylalanine synthesis	Eggs_Alcoholic_drinks	205	205	-0.104303	0.43925	-0.120926	0.15117	0.424704	0.715499	Eggs_Alcoholic_drinks	126	126	-0.134042	0.302491	-0.0499192	0.339903	0.883487	0.922419	Eggs_Alcoholic_drinks	223	223	-0.0546888	0.448173	-0.0842566	0.140969	0.550666	0.853533	Eggs_Alcoholic_drinks	871	871	0.0583724	0.606478	0.0264007	0.061993	0.670311	0.975509	Eggs_Alcoholic_drinks	43.759	8.65543	50.3214	260.205	0.0524907	-0.00852477	-0.162405	0.870987	0.966376	NS	NS	NS
P18_Formaldehyde assimilation	Dairy_Cereals	205	205	-0.161259	0.558239	0.0435429	0.134072	0.745695	0.856475	Dairy_Cereals	126	126	-0.0521211	0.621192	0.0371346	0.13992	0.791158	0.918322	Dairy_Cereals	223	223	-0.0111794	0.671357	-0.0574813	0.0963036	0.551213	0.846927	Dairy_Cereals	871	871	0.0462207	0.622802	0.0677833	0.0474707	0.153682	0.917007	Dairy_Cereals	55.6315	51.0785	107.824	443.76	0.0389754	0.0428392	1.09914	0.271708	0.968002	NS	NS	NS
P1_AA-synthesis and starch degradation	Dairy_Cereals	205	205	-0.161259	0.558239	0.0341942	0.136389	0.802298	0.856475	Dairy_Cereals	126	126	-0.0521211	0.621192	0.0319227	0.144029	0.824971	0.918322	Dairy_Cereals	223	223	-0.0111794	0.671357	-0.120612	0.105349	0.253518	0.846927	Dairy_Cereals	871	871	0.0462207	0.622802	-0.0487728	0.0519316	0.347904	0.944825	Dairy_Cereals	53.7575	48.2056	90.1033	370.797	0.0421501	-0.0454379	-1.078	0.281033	0.968002	NS	NS	NS
P23_L-glutamine synthesis	Savoury_snacks	205	205	-0.0114351	0.501597	0.0409598	0.152779	0.7889	0.93221	Savoury_snacks	126	126	0.0331572	0.582506	0.0457463	0.168608	0.786613	0.960509	Savoury_snacks	223	223	-0.010086	0.411775	0.0492179	0.165503	0.766458	0.925301	Savoury_snacks	871	871	0.000932337	0.495994	-0.0125616	0.0708844	0.859384	0.942412	Savoury_snacks	42.8426	35.1757	36.5079	199.021	0.056474	0.00848617	0.150267	0.880554	0.969017	NS	NS	NS
P2_Aerobic respiration, ECA-, LPS-, heme-synthesis	Savoury_snacks	205	205	-0.0114351	0.501597	-0.0660073	0.102338	0.519675	0.898958	Savoury_snacks	126	126	0.0331572	0.582506	0.168517	0.0664707	0.0125692	0.389645	Savoury_snacks	223	223	-0.010086	0.411775	-0.296685	0.0878545	0.000868343	0.00672966	Savoury_snacks	871	871	0.000932337	0.495994	0.00456323	0.0346433	0.895236	0.942412	Savoury_snacks	95.4828	226.328	129.56	833.223	0.0279008	-0.00217872	-0.078088	0.937758	0.969017	NS	NS	NS
P27_dTTP synthesis	Savoury_snacks	205	205	-0.0114351	0.501597	0.129927	0.160937	0.420447	0.898958	Savoury_snacks	126	126	0.0331572	0.582506	-0.0412469	0.171905	0.810786	0.960509	Savoury_snacks	223	223	-0.010086	0.411775	-0.231858	0.160821	0.150825	0.389631	Savoury_snacks	871	871	0.000932337	0.495994	0.0188393	0.0707908	0.790205	0.942412	Savoury_snacks	38.6092	33.8394	38.6646	199.548	0.0567357	-0.00510121	-0.0899118	0.928357	0.969017	NS	NS	NS
P7_Colanic acid building blocks synthesis	Savoury_snacks	205	205	-0.0114351	0.501597	0.194412	0.10707	0.070913	0.631305	Savoury_snacks	126	126	0.0331572	0.582506	-0.0420667	0.149103	0.778328	0.960509	Savoury_snacks	223	223	-0.010086	0.411775	-0.209965	0.122379	0.0876453	0.2717	Savoury_snacks	871	871	0.000932337	0.495994	-0.00654867	0.0592461	0.912012	0.942412	Savoury_snacks	87.2302	44.9808	66.7706	284.893	0.0454605	-0.00169204	-0.03722	0.97031	0.97031	NS	NS	NS
P30_Mannan degradation	Eggs_Alcoholic_drinks	205	205	-0.104303	0.43925	0.282405	0.221385	0.203575	0.545366	Eggs_Alcoholic_drinks	126	126	-0.134042	0.302491	0.143112	0.366784	0.697095	0.900415	Eggs_Alcoholic_drinks	223	223	-0.0546888	0.448173	-0.225608	0.149751	0.13338	0.70834	Eggs_Alcoholic_drinks	871	871	0.0583724	0.606478	0.0132235	0.047689	0.781626	0.975509	Eggs_Alcoholic_drinks	20.4034	7.43326	44.5922	439.707	0.0441883	0.0050376	0.114003	0.909235	0.971941	NS	NS	NS
P20_Terpenoid synthesis via mevalonate	Dairy_Cereals	205	205	-0.161259	0.558239	0.173197	0.117469	0.141953	0.721032	Dairy_Cereals	126	126	-0.0521211	0.621192	0.224214	0.130804	0.0890883	0.46029	Dairy_Cereals	223	223	-0.0111794	0.671357	0.0485881	0.0992573	0.624971	0.846927	Dairy_Cereals	871	871	0.0462207	0.622802	-0.0233255	0.0521956	0.655069	0.957321	Dairy_Cereals	72.4692	58.4461	101.502	367.056	0.0408428	0.0367421	0.899599	0.368334	0.97285	NS	NS	NS
P28_UTP and CTP degradation	Dairy_Cereals	205	205	-0.161259	0.558239	-0.0306748	0.1541	0.842421	0.856475	Dairy_Cereals	126	126	-0.0521211	0.621192	-0.0337123	0.141845	0.812542	0.918322	Dairy_Cereals	223	223	-0.0111794	0.671357	0.00960362	0.0985171	0.922434	0.953182	Dairy_Cereals	871	871	0.0462207	0.622802	0.0533972	0.0510442	0.295809	0.917007	Dairy_Cereals	42.1108	49.7021	103.033	383.802	0.0415712	0.0319989	0.769737	0.441456	0.97285	NS	NS	NS
P8_Creatinine degradation I	Dairy_Cereals	205	205	-0.161259	0.558239	0.0452046	0.115129	0.695003	0.856475	Dairy_Cereals	126	126	-0.0521211	0.621192	-0.0253087	0.132911	0.849303	0.918322	Dairy_Cereals	223	223	-0.0111794	0.671357	-0.0725052	0.105898	0.494283	0.846927	Dairy_Cereals	871	871	0.0462207	0.622802	0.0676112	0.0577189	0.241766	0.917007	Dairy_Cereals	75.4455	56.6082	89.171	300.168	0.0437943	0.0303171	0.692262	0.488773	0.97285	NS	NS	NS
P24_L-phenylalanine synthesis	Dairy_Cereals	205	205	-0.161259	0.558239	0.190923	0.120965	0.116079	0.721032	Dairy_Cereals	126	126	-0.0521211	0.621192	-0.130635	0.153803	0.397371	0.797383	Dairy_Cereals	223	223	-0.0111794	0.671357	0.0971912	0.0993452	0.329007	0.846927	Dairy_Cereals	871	871	0.0462207	0.622802	-0.0137438	0.0573876	0.810782	0.957321	Dairy_Cereals	68.3404	42.2736	101.323	303.643	0.0440405	0.0256018	0.581325	0.561022	0.97285	NS	NS	NS
P30_Mannan degradation	Dairy_Cereals	205	205	-0.161259	0.558239	-0.297262	0.17745	0.0954678	0.721032	Dairy_Cereals	126	126	-0.0521211	0.621192	-0.253313	0.164942	0.127228	0.563437	Dairy_Cereals	223	223	-0.0111794	0.671357	0.0613356	0.10615	0.563983	0.846927	Dairy_Cereals	871	871	0.0462207	0.622802	0.0582786	0.0441006	0.186687	0.917007	Dairy_Cereals	31.7577	36.7568	88.7491	514.176	0.0385919	0.0248088	0.642849	0.520322	0.97285	NS	NS	NS
P17_Polyamine synthesis	Dairy_Cereals	205	205	-0.161259	0.558239	0.106718	0.137622	0.438998	0.850559	Dairy_Cereals	126	126	-0.0521211	0.621192	-0.0215329	0.145675	0.882737	0.918322	Dairy_Cereals	223	223	-0.0111794	0.671357	-0.0352439	0.099323	0.723053	0.862102	Dairy_Cereals	871	871	0.0462207	0.622802	0.0315114	0.057349	0.582826	0.957321	Dairy_Cereals	52.7992	47.1226	101.368	304.053	0.0444843	0.0210322	0.4728	0.636356	0.97285	NS	NS	NS
P11_Mixed acid fermentation	Dairy_Cereals	205	205	-0.161259	0.558239	0.126047	0.14944	0.399983	0.826632	Dairy_Cereals	126	126	-0.0521211	0.621192	-0.327228	0.161889	0.0454728	0.442063	Dairy_Cereals	223	223	-0.0111794	0.671357	0.0669945	0.102579	0.51438	0.846927	Dairy_Cereals	871	871	0.0462207	0.622802	0.0316741	0.0505954	0.531463	0.957321	Dairy_Cereals	44.7779	38.156	95.0358	390.641	0.0419365	0.0209255	0.498979	0.617794	0.97285	NS	NS	NS
P2_Aerobic respiration, ECA-, LPS-, heme-synthesis	Dairy_Cereals	205	205	-0.161259	0.558239	-0.0554014	0.0948862	0.559967	0.856475	Dairy_Cereals	126	126	-0.0521211	0.621192	0.0206554	0.0617095	0.738441	0.918322	Dairy_Cereals	223	223	-0.0111794	0.671357	0.047711	0.0570452	0.403865	0.846927	Dairy_Cereals	871	871	0.0462207	0.622802	0.00999279	0.0266777	0.708068	0.957321	Dairy_Cereals	111.069	262.601	307.3	1405.09	0.0218946	0.0134095	0.612459	0.540234	0.97285	NS	NS	NS
P6_Ferment. glutamate and pyruvate	Dairy_Cereals	205	205	-0.161259	0.558239	-0.112472	0.119819	0.349032	0.826632	Dairy_Cereals	126	126	-0.0521211	0.621192	-0.122233	0.146556	0.405916	0.797383	Dairy_Cereals	223	223	-0.0111794	0.671357	-0.048009	0.0942409	0.610969	0.846927	Dairy_Cereals	871	871	0.0462207	0.622802	0.0476494	0.0448942	0.288817	0.917007	Dairy_Cereals	69.6543	46.5581	112.596	496.158	0.0371399	0.00649817	0.174965	0.861107	0.97285	NS	NS	NS
P10_FA and beta-oxidation	Dairy_Cereals	205	205	-0.161259	0.558239	0.112311	0.0639753	0.0807153	0.721032	Dairy_Cereals	126	126	-0.0521211	0.621192	-0.0851157	0.0831435	0.308061	0.797383	Dairy_Cereals	223	223	-0.0111794	0.671357	-0.0212009	0.0431504	0.623695	0.846927	Dairy_Cereals	871	871	0.0462207	0.622802	0.00704756	0.0226	0.755238	0.957321	Dairy_Cereals	244.329	144.658	537.07	1957.88	0.0186212	0.00608195	0.326614	0.74396	0.97285	NS	NS	NS
P31_Anhydromuropeptides recycling	Dairy_Cereals	205	205	-0.161259	0.558239	-0.0434986	0.104031	0.676302	0.856475	Dairy_Cereals	126	126	-0.0521211	0.621192	0.104873	0.142436	0.462997	0.797383	Dairy_Cereals	223	223	-0.0111794	0.671357	-0.0511782	0.105583	0.628365	0.846927	Dairy_Cereals	871	871	0.0462207	0.622802	0.0159343	0.05796	0.783444	0.957321	Dairy_Cereals	92.4004	49.29	89.7037	297.676	0.0434754	0.00246147	0.0566175	0.95485	0.97285	NS	NS	NS
P26_Thiamin synthesis	Dairy_Cereals	205	205	-0.161259	0.558239	-0.172187	0.136713	0.209332	0.721032	Dairy_Cereals	126	126	-0.0521211	0.621192	0.120699	0.159642	0.451095	0.797383	Dairy_Cereals	223	223	-0.0111794	0.671357	0.0257113	0.100758	0.798828	0.884416	Dairy_Cereals	871	871	0.0462207	0.622802	0.00895327	0.0547878	0.870228	0.961418	Dairy_Cereals	53.5034	39.2381	98.5002	333.144	0.0436691	0.00198076	0.0453584	0.963822	0.97285	NS	NS	NS
P29_DMK synthesis	Dairy_Cereals	205	205	-0.161259	0.558239	-0.053607	0.102486	0.601511	0.856475	Dairy_Cereals	126	126	-0.0521211	0.621192	-0.0175286	0.104249	0.866754	0.918322	Dairy_Cereals	223	223	-0.0111794	0.671357	-0.102116	0.074999	0.174749	0.846927	Dairy_Cereals	871	871	0.0462207	0.622802	0.0423119	0.0400105	0.29057	0.917007	Dairy_Cereals	95.2069	92.0147	177.782	624.671	0.0317873	0.00157629	0.0495888	0.96045	0.97285	NS	NS	NS
P15_Methanogenesis	Dairy_Cereals	205	205	-0.161259	0.558239	-0.0347473	0.0387093	0.370559	0.826632	Dairy_Cereals	126	126	-0.0521211	0.621192	0.0402754	0.114053	0.724611	0.918322	Dairy_Cereals	223	223	-0.0111794	0.671357	0.0589583	0.0978708	0.547531	0.846927	Dairy_Cereals	871	871	0.0462207	0.622802	0.0367799	0.0536856	0.493466	0.957321	Dairy_Cereals	667.373	76.8754	104.398	346.964	0.0289204	-0.000984269	-0.0340337	0.97285	0.97285	NS	NS	NS
P12_Ferment. pyruvate and glycerol	Dairy_Cereals	205	205	-0.161259	0.558239	-0.0229097	0.0788048	0.771573	0.856475	Dairy_Cereals	126	126	-0.0521211	0.621192	0.0552641	0.0716584	0.442095	0.797383	Dairy_Cereals	223	223	-0.0111794	0.671357	0.0101543	0.0476341	0.831393	0.88873	Dairy_Cereals	871	871	0.0462207	0.622802	-0.0134116	0.0231393	0.562336	0.957321	Dairy_Cereals	161.025	194.745	440.722	1867.66	0.019374	-0.00506717	-0.261544	0.793673	0.97285	NS	NS	NS
P21_Glycogen degradation	Dairy_Cereals	205	205	-0.161259	0.558239	0.107646	0.165372	0.515842	0.856475	Dairy_Cereals	126	126	-0.0521211	0.621192	-0.0784108	0.181968	0.66731	0.918322	Dairy_Cereals	223	223	-0.0111794	0.671357	-0.0304676	0.0969545	0.753636	0.865286	Dairy_Cereals	871	871	0.0462207	0.622802	-0.00485181	0.0499366	0.922622	0.961418	Dairy_Cereals	36.5658	30.2004	106.381	401.016	0.0417333	-0.00630256	-0.15102	0.87996	0.97285	NS	NS	NS
P27_dTTP synthesis	Dairy_Cereals	205	205	-0.161259	0.558239	-0.0273267	0.149421	0.855075	0.856475	Dairy_Cereals	126	126	-0.0521211	0.621192	-0.0155523	0.154677	0.920078	0.920078	Dairy_Cereals	223	223	-0.0111794	0.671357	-0.0676403	0.102331	0.509317	0.846927	Dairy_Cereals	871	871	0.0462207	0.622802	0.0137906	0.0545177	0.800362	0.957321	Dairy_Cereals	44.7895	41.7973	95.4958	336.453	0.0439148	-0.00712287	-0.162198	0.87115	0.97285	NS	NS	NS
P9_Enterobactin-, LPS-, quinone-synthesis (E.coli)	Dairy_Cereals	205	205	-0.161259	0.558239	-0.102938	0.119373	0.389548	0.826632	Dairy_Cereals	126	126	-0.0521211	0.621192	-0.0931734	0.108793	0.393467	0.797383	Dairy_Cereals	223	223	-0.0111794	0.671357	0.0680036	0.0843921	0.421237	0.846927	Dairy_Cereals	871	871	0.0462207	0.622802	-0.00204531	0.041507	0.960711	0.961418	Dairy_Cereals	70.1755	84.489	140.41	580.439	0.0337963	-0.00769228	-0.227607	0.819952	0.97285	NS	NS	NS
P4_Ferment. acetylene to acetate	Dairy_Cereals	205	205	-0.161259	0.558239	0.0110011	0.0607468	0.856475	0.856475	Dairy_Cereals	126	126	-0.0521211	0.621192	-0.0639834	0.0646605	0.324396	0.797383	Dairy_Cereals	223	223	-0.0111794	0.671357	-0.0252362	0.0445162	0.571372	0.846927	Dairy_Cereals	871	871	0.0462207	0.622802	-0.00109312	0.0225904	0.961418	0.961418	Dairy_Cereals	270.99	239.178	504.62	1959.52	0.0183361	-0.00914459	-0.498721	0.617976	0.97285	NS	NS	NS
P7_Colanic acid building blocks synthesis	Dairy_Cereals	205	205	-0.161259	0.558239	-0.136813	0.0996023	0.171113	0.721032	Dairy_Cereals	126	126	-0.0521211	0.621192	-0.107041	0.133822	0.425364	0.797383	Dairy_Cereals	223	223	-0.0111794	0.671357	0.115737	0.0777063	0.137831	0.846927	Dairy_Cereals	871	871	0.0462207	0.622802	-0.0188378	0.0456225	0.679778	0.957321	Dairy_Cereals	100.8	55.84	165.611	480.443	0.035296	-0.0120235	-0.340649	0.733368	0.97285	NS	NS	NS
P25_L-tyrosine synthesis	Dairy_Cereals	205	205	-0.161259	0.558239	-0.13376	0.131954	0.311963	0.826632	Dairy_Cereals	126	126	-0.0521211	0.621192	0.022478	0.160273	0.888699	0.918322	Dairy_Cereals	223	223	-0.0111794	0.671357	0.0430225	0.106188	0.685764	0.850347	Dairy_Cereals	871	871	0.0462207	0.622802	-0.0116375	0.0554432	0.833796	0.957321	Dairy_Cereals	57.4321	38.9297	88.6844	325.315	0.0442651	-0.0132798	-0.300005	0.764173	0.97285	NS	NS	NS
P3_AA-synthesis	Dairy_Cereals	205	205	-0.161259	0.558239	0.0574396	0.101562	0.572327	0.856475	Dairy_Cereals	126	126	-0.0521211	0.621192	0.0748424	0.0994877	0.453357	0.797383	Dairy_Cereals	223	223	-0.0111794	0.671357	-0.0694709	0.0781317	0.374907	0.846927	Dairy_Cereals	871	871	0.0462207	0.622802	-0.0235705	0.0382941	0.538378	0.957321	Dairy_Cereals	96.9486	101.033	163.812	681.925	0.0309534	-0.0137233	-0.443354	0.65751	0.97285	NS	NS	NS
P5_Biotin and FA-synthesis (E. coli)	Pastry_Sweets	205	205	-0.0467602	0.641192	-0.0122335	0.097388	0.900163	0.979632	Pastry_Sweets	126	126	0.0864701	0.764689	-0.0473186	0.152546	0.756953	0.886289	Pastry_Sweets	223	223	0.04413	0.575045	0.0711112	0.112817	0.529144	0.984127	Pastry_Sweets	871	871	-0.0122277	0.629675	6.25535e-05	0.0522507	0.999045	0.999045	Pastry_Sweets	105.436	42.9732	78.5696	366.283	0.041056	0.00385464	0.0938874	0.925199	0.97683	NS	NS	NS
P2_Aerobic respiration, ECA-, LPS-, heme-synthesis	Pastry_Sweets	205	205	-0.0467602	0.641192	0.0096247	0.0855759	0.910564	0.979632	Pastry_Sweets	126	126	0.0864701	0.764689	-0.0968292	0.0717154	0.179585	0.698324	Pastry_Sweets	223	223	0.04413	0.575045	0.120438	0.0700367	0.0869227	0.458453	Pastry_Sweets	871	871	-0.0122277	0.629675	-0.00304848	0.029223	0.916941	0.999045	Pastry_Sweets	136.552	194.435	203.868	1170.98	0.024212	0.00203481	0.0840411	0.933024	0.97683	NS	NS	NS
P27_dTTP synthesis	Pastry_Sweets	205	205	-0.0467602	0.641192	-0.286158	0.133123	0.0327964	0.589099	Pastry_Sweets	126	126	0.0864701	0.764689	0.0569786	0.179398	0.751333	0.886289	Pastry_Sweets	223	223	0.04413	0.575045	0.284195	0.124932	0.0238955	0.37038	Pastry_Sweets	871	871	-0.0122277	0.629675	-0.0111754	0.0597158	0.851593	0.999045	Pastry_Sweets	56.4275	31.0717	64.0694	280.428	0.0481127	0.00161474	0.0335616	0.973227	0.97683	NS	NS	NS
P31_Anhydromuropeptides recycling	Pastry_Sweets	205	205	-0.0467602	0.641192	-0.0806977	0.0936127	0.389705	0.81081	Pastry_Sweets	126	126	0.0864701	0.764689	0.00464914	0.165636	0.977654	0.977654	Pastry_Sweets	223	223	0.04413	0.575045	0.045161	0.130334	0.729301	0.984127	Pastry_Sweets	871	871	-0.0122277	0.629675	0.0282158	0.0634808	0.656808	0.928625	Pastry_Sweets	114.112	36.4495	58.8688	248.151	0.0467483	0.00135773	0.0290434	0.97683	0.97683	NS	NS	NS
P1_AA-synthesis and starch degradation	Pastry_Sweets	205	205	-0.0467602	0.641192	0.0640083	0.123462	0.604726	0.89269	Pastry_Sweets	126	126	0.0864701	0.764689	0.136394	0.166682	0.414815	0.698324	Pastry_Sweets	223	223	0.04413	0.575045	-0.166074	0.129914	0.202495	0.627735	Pastry_Sweets	871	871	-0.0122277	0.629675	-0.00131901	0.0569148	0.981516	0.999045	Pastry_Sweets	65.6048	35.9935	59.25	308.71	0.0461483	-0.00242475	-0.0525426	0.958096	0.97683	NS	NS	NS
P13_Ferment. to butanoate	Pastry_Sweets	205	205	-0.0467602	0.641192	-0.147073	0.0820994	0.0747479	0.589099	Pastry_Sweets	126	126	0.0864701	0.764689	-0.122113	0.12695	0.338034	0.698324	Pastry_Sweets	223	223	0.04413	0.575045	0.121638	0.0916778	0.18597	0.627735	Pastry_Sweets	871	871	-0.0122277	0.629675	0.020899	0.042482	0.62288	0.928625	Pastry_Sweets	148.361	62.0489	118.979	554.103	0.0336433	-0.00378539	-0.112515	0.910415	0.97683	NS	NS	NS
P28_UTP and CTP degradation	Pastry_Sweets	205	205	-0.0467602	0.641192	-0.0812936	0.13876	0.558634	0.865883	Pastry_Sweets	126	126	0.0864701	0.764689	0.151309	0.164035	0.35816	0.698324	Pastry_Sweets	223	223	0.04413	0.575045	-0.0905118	0.121426	0.456834	0.984127	Pastry_Sweets	871	871	-0.0122277	0.629675	0.000254951	0.0559456	0.996365	0.999045	Pastry_Sweets	51.9366	37.1644	67.8224	319.498	0.0458146	-0.00977301	-0.213316	0.83108	0.97683	NS	NS	NS
P2_Aerobic respiration, ECA-, LPS-, heme-synthesis	Fruit_Juice_Milk	205	205	0.0499406	0.971662	0.0756296	0.0523031	0.149754	0.422035	Fruit_Juice_Milk	126	126	0.0470696	0.883709	-0.0527587	0.0514265	0.307071	0.993163	Fruit_Juice_Milk	223	223	-0.0460608	0.585582	-0.0302373	0.0640047	0.637099	0.976547	Fruit_Juice_Milk	871	871	-0.00752221	0.66348	0.000466501	0.0254805	0.985397	0.985397	Fruit_Juice_Milk	365.548	378.117	244.105	1540.23	0.0198889	0.000409322	0.0205804	0.98358	0.98358	NS	NS	NS
P13_Ferment. to butanoate	Fruit_Juice_Milk	205	205	0.0499406	0.971662	0.0430574	0.050753	0.397251	0.684154	Fruit_Juice_Milk	126	126	0.0470696	0.883709	-0.0647924	0.0921422	0.483307	0.993163	Fruit_Juice_Milk	223	223	-0.0460608	0.585582	-0.0776326	0.0834303	0.353142	0.976547	Fruit_Juice_Milk	871	871	-0.00752221	0.66348	0.00142085	0.0370463	0.969415	0.985397	Fruit_Juice_Milk	388.218	117.783	143.666	728.635	0.0269357	-0.000749933	-0.0278416	0.977788	0.98358	NS	NS	NS
P23_L-glutamine synthesis	Eggs_Alcoholic_drinks	205	205	-0.104303	0.43925	0.267811	0.175182	0.127913	0.545366	Eggs_Alcoholic_drinks	126	126	-0.134042	0.302491	-0.0175113	0.334339	0.958316	0.958316	Eggs_Alcoholic_drinks	223	223	-0.0546888	0.448173	-0.0650572	0.148632	0.662035	0.873112	Eggs_Alcoholic_drinks	871	871	0.0583724	0.606478	-0.016916	0.0589729	0.774301	0.975509	Eggs_Alcoholic_drinks	32.5852	8.94596	45.2662	287.538	0.0516856	0.00203325	0.0393389	0.96862	0.983839	NS	NS	NS
P4_Ferment. acetylene to acetate	Eggs_Alcoholic_drinks	205	205	-0.104303	0.43925	0.0149887	0.0755644	0.842969	0.901105	Eggs_Alcoholic_drinks	126	126	-0.134042	0.302491	0.0786615	0.142884	0.582982	0.896758	Eggs_Alcoholic_drinks	223	223	-0.0546888	0.448173	-0.0544568	0.0630152	0.388445	0.70834	Eggs_Alcoholic_drinks	871	871	0.0583724	0.606478	0.0037712	0.0244709	0.87756	0.975509	Eggs_Alcoholic_drinks	175.132	48.9815	251.831	1669.93	0.0215873	-0.000437271	-0.020256	0.983839	0.983839	NS	NS	NS
P27_dTTP synthesis	Dairy_lf	205	205	-0.0789894	0.503158	-0.118633	0.156953	0.450631	0.966242	Dairy_lf	126	126	-0.0346258	0.518191	0.0263982	0.186121	0.88745	0.976588	Dairy_lf	223	223	0.0070026	0.453292	0.184128	0.1408	0.192351	0.79612	Dairy_lf	871	871	0.0221807	0.682257	-0.0109605	0.0479588	0.819281	0.989143	Dairy_lf	40.5939	28.8674	50.4423	434.773	0.04246	0.000845087	0.0199031	0.984121	0.984121	NS	NS	NS
P16_Bifidobacterium shunt	Dairy_Lean_beef	205	205	-0.201195	0.55624	0.14436	0.136613	0.291926	0.936721	Dairy_Lean_beef	126	126	-0.146976	0.56817	0.117211	0.167862	0.486368	0.942544	Dairy_Lean_beef	223	223	0.0254258	0.537627	0.0403739	0.13333	0.762323	0.952536	Dairy_Lean_beef	871	871	0.0612162	0.608226	0.00225328	0.0562017	0.968028	0.987643	Dairy_Lean_beef	53.582	35.489	56.2528	316.593	0.0465284	0.0322121	0.692309	0.488743	0.987873	NS	NS	NS
P19_Biotin biosynthesis II (Bacillus subtilis)	Dairy_Lean_beef	205	205	-0.201195	0.55624	0.027733	0.12014	0.817677	0.936721	Dairy_Lean_beef	126	126	-0.146976	0.56817	-0.118154	0.150978	0.435408	0.942544	Dairy_Lean_beef	223	223	0.0254258	0.537627	0.0234247	0.132996	0.860355	0.952536	Dairy_Lean_beef	871	871	0.0612162	0.608226	0.0533459	0.0593549	0.36903	0.817139	Dairy_Lean_beef	69.283	43.8705	56.5358	283.848	0.0469562	0.0291143	0.62003	0.535238	0.987873	NS	NS	NS
P5_Biotin and FA-synthesis (E. coli)	Dairy_Lean_beef	205	205	-0.201195	0.55624	0.0636669	0.105607	0.547282	0.936721	Dairy_Lean_beef	126	126	-0.146976	0.56817	0.137548	0.145178	0.345314	0.942544	Dairy_Lean_beef	223	223	0.0254258	0.537627	-0.0239156	0.114838	0.835225	0.952536	Dairy_Lean_beef	871	871	0.0612162	0.608226	0.00980656	0.0489115	0.84114	0.987643	Dairy_Lean_beef	89.6639	47.446	75.8282	418.001	0.0398113	0.023014	0.578077	0.563212	0.987873	NS	NS	NS
P26_Thiamin synthesis	Dairy_Lean_beef	205	205	-0.201195	0.55624	0.105185	0.134035	0.433527	0.936721	Dairy_Lean_beef	126	126	-0.146976	0.56817	-0.0723363	0.177164	0.68378	0.942544	Dairy_Lean_beef	223	223	0.0254258	0.537627	-0.042093	0.126457	0.739558	0.952536	Dairy_Lean_beef	871	871	0.0612162	0.608226	0.0262342	0.0561707	0.640586	0.961274	Dairy_Lean_beef	55.6628	31.8603	62.5341	316.942	0.0462745	0.0197703	0.42724	0.669205	0.987873	NS	NS	NS
P12_Ferment. pyruvate and glycerol	Dairy_Lean_beef	205	205	-0.201195	0.55624	0.0108437	0.0770965	0.888289	0.937169	Dairy_Lean_beef	126	126	-0.146976	0.56817	0.022739	0.0795595	0.775515	0.942544	Dairy_Lean_beef	223	223	0.0254258	0.537627	0.0725155	0.0595926	0.224981	0.80317	Dairy_Lean_beef	871	871	0.0612162	0.608226	-0.0269579	0.0237114	0.255889	0.733554	Dairy_Lean_beef	168.241	157.985	281.589	1778.63	0.0204703	-0.00926556	-0.452634	0.650812	0.987873	NS	NS	NS
P1_AA-synthesis and starch degradation	Dairy_Lean_beef	205	205	-0.201195	0.55624	-0.0105315	0.13343	0.937169	0.937169	Dairy_Lean_beef	126	126	-0.146976	0.56817	-0.0625738	0.1595	0.695524	0.942544	Dairy_Lean_beef	223	223	0.0254258	0.537627	0.112474	0.132411	0.396574	0.945678	Dairy_Lean_beef	871	871	0.0612162	0.608226	-0.0401538	0.0532591	0.451095	0.856151	Dairy_Lean_beef	56.1685	39.3078	57.0368	352.543	0.044497	-0.0213678	-0.480209	0.631079	0.987873	NS	NS	NS
P17_Polyamine synthesis	Dairy_Lean_beef	205	205	-0.201195	0.55624	-0.0914216	0.134646	0.497942	0.936721	Dairy_Lean_beef	126	126	-0.146976	0.56817	-0.0265527	0.161389	0.869594	0.942544	Dairy_Lean_beef	223	223	0.0254258	0.537627	-0.23377	0.12369	0.0600963	0.531381	Dairy_Lean_beef	871	871	0.0612162	0.608226	0.0399421	0.0587976	0.49712	0.856151	Dairy_Lean_beef	55.1584	38.3928	65.3623	289.255	0.0472367	-0.0218409	-0.462372	0.643815	0.987873	NS	NS	NS
P9_Enterobactin-, LPS-, quinone-synthesis (E.coli)	Dairy_Lean_beef	205	205	-0.201195	0.55624	-0.051296	0.116913	0.661316	0.936721	Dairy_Lean_beef	126	126	-0.146976	0.56817	-0.0314394	0.120865	0.795217	0.942544	Dairy_Lean_beef	223	223	0.0254258	0.537627	-0.102143	0.105859	0.335671	0.86715	Dairy_Lean_beef	871	871	0.0612162	0.608226	-0.00456029	0.0425592	0.914694	0.987643	Dairy_Lean_beef	73.1603	68.4543	89.2373	552.093	0.0357383	-0.0223996	-0.626766	0.530813	0.987873	NS	NS	NS
P24_L-phenylalanine synthesis	Ready_meals	205	205	-0.0761095	0.668047	-0.109517	0.0996298	0.272992	0.856228	Ready_meals	126	126	-0.0726462	0.963861	-0.0688588	0.104908	0.512842	0.700289	Ready_meals	223	223	0.0593805	0.744316	0.0214929	0.0855079	0.801777	0.977777	Ready_meals	871	871	0.0135936	0.640699	0.0711124	0.0571805	0.213967	0.98222	Ready_meals	100.744	90.8613	136.769	305.847	0.0397081	0.0116666	0.293809	0.768904	0.988026	NS	NS	NS
P21_Glycogen degradation	Ready_meals	205	205	-0.0761095	0.668047	0.053915	0.135861	0.691911	0.969182	Ready_meals	126	126	-0.0726462	0.963861	0.0930481	0.123775	0.45367	0.700289	Ready_meals	223	223	0.0593805	0.744316	-0.0758609	0.0831385	0.362537	0.963447	Ready_meals	871	871	0.0135936	0.640699	0.0152826	0.0497968	0.758994	0.98222	Ready_meals	54.1766	65.2736	144.676	403.271	0.0387086	0.00626659	0.161891	0.871392	0.988026	NS	NS	NS
P12_Ferment. pyruvate and glycerol	Ready_meals	205	205	-0.0761095	0.668047	0.0876655	0.0645786	0.176167	0.856228	Ready_meals	126	126	-0.0726462	0.963861	0.0314017	0.0488558	0.521617	0.700289	Ready_meals	223	223	0.0593805	0.744316	0.00339058	0.0409188	0.934038	0.977777	Ready_meals	871	871	0.0135936	0.640699	-0.012403	0.0230788	0.591118	0.98222	Ready_meals	239.785	418.955	597.247	1877.46	0.0178644	0.00412188	0.230731	0.817524	0.988026	NS	NS	NS
P4_Ferment. acetylene to acetate	Ready_meals	205	205	-0.0761095	0.668047	0.0262924	0.0498422	0.598425	0.969182	Ready_meals	126	126	-0.0726462	0.963861	0.027215	0.0441611	0.538887	0.700289	Ready_meals	223	223	0.0593805	0.744316	0.0123817	0.0425853	0.771522	0.977777	Ready_meals	871	871	0.0135936	0.640699	-0.0113365	0.0225337	0.615028	0.98222	Ready_meals	402.537	512.767	551.418	1969.4	0.0170595	0.00263084	0.154216	0.87744	0.988026	NS	NS	NS
P27_dTTP synthesis	Ready_meals	205	205	-0.0761095	0.668047	-0.136227	0.122304	0.266692	0.856228	Ready_meals	126	126	-0.0726462	0.963861	-0.0753542	0.105157	0.475022	0.700289	Ready_meals	223	223	0.0593805	0.744316	0.0073856	0.0879841	0.93318	0.977777	Ready_meals	871	871	0.0135936	0.640699	0.0478231	0.0543454	0.379112	0.98222	Ready_meals	66.8528	90.432	129.179	338.59	0.0399983	0.00195976	0.048996	0.960922	0.988026	NS	NS	NS
P23_L-glutamine synthesis	Ready_meals	205	205	-0.0761095	0.668047	-0.119575	0.115987	0.303823	0.856228	Ready_meals	126	126	-0.0726462	0.963861	-0.0975214	0.102984	0.345563	0.700289	Ready_meals	223	223	0.0593805	0.744316	0.0505532	0.0900696	0.575194	0.963447	Ready_meals	871	871	0.0135936	0.640699	0.0362241	0.0544265	0.505869	0.98222	Ready_meals	74.3331	94.2893	123.266	337.582	0.0398577	0.000598167	0.0150076	0.988026	0.988026	NS	NS	NS
P8_Creatinine degradation I	Ready_meals	205	205	-0.0761095	0.668047	-0.00637581	0.0945558	0.946308	0.969182	Ready_meals	126	126	-0.0726462	0.963861	0.0597935	0.0903978	0.509592	0.700289	Ready_meals	223	223	0.0593805	0.744316	0.0583844	0.0909728	0.521695	0.963447	Ready_meals	871	871	0.0135936	0.640699	-0.0522719	0.0575783	0.364215	0.98222	Ready_meals	111.847	122.373	120.83	301.635	0.0390231	-0.00321079	-0.0822793	0.934425	0.988026	NS	NS	NS
P5_Biotin and FA-synthesis (E. coli)	Ready_meals	205	205	-0.0761095	0.668047	-0.0936217	0.0884821	0.291299	0.856228	Ready_meals	126	126	-0.0726462	0.963861	-0.0744851	0.0893485	0.406137	0.700289	Ready_meals	223	223	0.0593805	0.744316	-0.0048451	0.0785933	0.9509	0.977777	Ready_meals	871	871	0.0135936	0.640699	0.0435446	0.0475488	0.360034	0.98222	Ready_meals	127.729	125.264	161.893	442.303	0.0341556	-0.00328161	-0.0960782	0.923458	0.988026	NS	NS	NS
P14_Sucrose degradation, heme synthesis (aerobic)	Porridge_ready_Fish_fried_Chocolatemilk	205	205	0.0773975	0.762121	-0.100244	0.0770916	0.194994	0.516594	Porridge_ready_Fish_fried_Chocolatemilk	126	126	0.129518	0.829902	-0.0584484	0.100389	0.56151	0.975487	Porridge_ready_Fish_fried_Chocolatemilk	223	223	-0.0295003	0.594099	-0.102257	0.0875667	0.244184	0.630808	Porridge_ready_Fish_fried_Chocolatemilk	871	871	-0.0289628	0.569582	0.0768682	0.046378	0.0977954	0.461559	Porridge_ready_Fish_fried_Chocolatemilk	168.262	99.2273	130.413	464.918	0.0340439	-0.000307375	-0.00902878	0.992796	0.992796	NS	NS	NS
P20_Terpenoid synthesis via mevalonate	Dairy_Lean_beef	205	205	-0.201195	0.55624	0.0792656	0.115378	0.492878	0.936721	Dairy_Lean_beef	126	126	-0.146976	0.56817	0.0188328	0.146671	0.898046	0.942544	Dairy_Lean_beef	223	223	0.0254258	0.537627	0.0654222	0.124575	0.600007	0.952536	Dairy_Lean_beef	871	871	0.0612162	0.608226	-0.0109751	0.0535239	0.837581	0.987643	Dairy_Lean_beef	75.1196	46.4849	64.437	349.064	0.0432295	0.0134823	0.311877	0.755134	0.994094	NS	NS	NS
P2_Aerobic respiration, ECA-, LPS-, heme-synthesis	Dairy_Lean_beef	205	205	-0.201195	0.55624	-0.0800017	0.0927083	0.389209	0.936721	Dairy_Lean_beef	126	126	-0.146976	0.56817	-0.0776043	0.0714099	0.279403	0.942544	Dairy_Lean_beef	223	223	0.0254258	0.537627	-0.039363	0.0716674	0.583402	0.952536	Dairy_Lean_beef	871	871	0.0612162	0.608226	0.0139647	0.0273522	0.609796	0.961274	Dairy_Lean_beef	116.349	196.102	194.696	1336.65	0.0232886	-0.00733515	-0.314967	0.752787	0.994094	NS	NS	NS
P31_Anhydromuropeptides recycling	Dairy_Lean_beef	205	205	-0.201195	0.55624	-0.106999	0.101508	0.293116	0.936721	Dairy_Lean_beef	126	126	-0.146976	0.56817	0.0529727	0.158087	0.738145	0.942544	Dairy_Lean_beef	223	223	0.0254258	0.537627	-0.0751375	0.132499	0.571247	0.952536	Dairy_Lean_beef	871	871	0.0612162	0.608226	0.021709	0.0594276	0.714975	0.963663	Dairy_Lean_beef	97.0511	40.0138	56.9602	283.155	0.0457782	-0.0134071	-0.292871	0.769621	0.994094	NS	NS	NS
P29_DMK synthesis	Dairy_Lean_beef	205	205	-0.201195	0.55624	-0.035388	0.100273	0.724525	0.936721	Dairy_Lean_beef	126	126	-0.146976	0.56817	0.099716	0.115151	0.388242	0.942544	Dairy_Lean_beef	223	223	0.0254258	0.537627	-0.164752	0.0938746	0.080666	0.531381	Dairy_Lean_beef	871	871	0.0612162	0.608226	0.0317372	0.0410373	0.439512	0.856151	Dairy_Lean_beef	99.4565	75.4159	113.476	593.802	0.0336689	0.00470534	0.139753	0.888855	0.996466	NS	NS	NS
P21_Glycogen degradation	Dairy_Lean_beef	205	205	-0.201195	0.55624	-0.0314707	0.161897	0.846071	0.936721	Dairy_Lean_beef	126	126	-0.146976	0.56817	-0.298254	0.199911	0.138342	0.942544	Dairy_Lean_beef	223	223	0.0254258	0.537627	0.123144	0.121436	0.311678	0.86715	Dairy_Lean_beef	871	871	0.0612162	0.608226	0.00443495	0.0512028	0.930997	0.987643	Dairy_Lean_beef	38.1525	25.0222	67.8122	381.427	0.0441763	0.00269053	0.0609044	0.951435	0.996466	NS	NS	NS
P15_Methanogenesis	Dairy_Lean_beef	205	205	-0.201195	0.55624	0.0137826	0.0383447	0.719683	0.936721	Dairy_Lean_beef	126	126	-0.146976	0.56817	-0.00913062	0.126422	0.942544	0.942544	Dairy_Lean_beef	223	223	0.0254258	0.537627	-0.0403627	0.122918	0.742947	0.952536	Dairy_Lean_beef	871	871	0.0612162	0.608226	-0.0147119	0.0550594	0.789378	0.987643	Dairy_Lean_beef	680.125	62.5687	66.1869	329.865	0.0296337	0.00112244	0.0378771	0.969786	0.996466	NS	NS	NS
P27_dTTP synthesis	Dairy_Lean_beef	205	205	-0.201195	0.55624	0.0648361	0.146079	0.657639	0.936721	Dairy_Lean_beef	126	126	-0.146976	0.56817	0.0172766	0.171366	0.919864	0.942544	Dairy_Lean_beef	223	223	0.0254258	0.537627	-0.183551	0.127968	0.152912	0.790046	Dairy_Lean_beef	871	871	0.0612162	0.608226	0.02528	0.0558955	0.651186	0.961274	Dairy_Lean_beef	46.8622	34.0526	61.0657	320.071	0.0465216	0.00110254	0.0236995	0.981092	0.996466	NS	NS	NS
P7_Colanic acid building blocks synthesis	Dairy_Lean_beef	205	205	-0.201195	0.55624	-0.0220817	0.0978628	0.821714	0.936721	Dairy_Lean_beef	126	126	-0.146976	0.56817	0.0129151	0.148651	0.93091	0.942544	Dairy_Lean_beef	223	223	0.0254258	0.537627	-0.0198693	0.0980233	0.83956	0.952536	Dairy_Lean_beef	871	871	0.0612162	0.608226	0.00803455	0.0467831	0.863682	0.987643	Dairy_Lean_beef	104.415	45.2549	104.074	456.902	0.0375123	-0.000166138	-0.00442889	0.996466	0.996466	NS	NS	NS
P3_AA-synthesis	Dairy_Lean_beef	205	205	-0.201195	0.55624	0.0273015	0.0993918	0.783843	0.936721	Dairy_Lean_beef	126	126	-0.146976	0.56817	-0.0146213	0.110474	0.894929	0.942544	Dairy_Lean_beef	223	223	0.0254258	0.537627	0.0610418	0.0981604	0.534688	0.952536	Dairy_Lean_beef	871	871	0.0612162	0.608226	-0.0159599	0.0392699	0.684537	0.963663	Dairy_Lean_beef	101.228	81.9377	103.783	648.457	0.0326964	-0.00261766	-0.0800596	0.93619	0.996466	NS	NS	NS
P13_Ferment. to butanoate	Dairy_Lean_beef	205	205	-0.201195	0.55624	0.0310938	0.0897941	0.729499	0.936721	Dairy_Lean_beef	126	126	-0.146976	0.56817	0.0665853	0.121535	0.584799	0.942544	Dairy_Lean_beef	223	223	0.0254258	0.537627	-0.111743	0.093314	0.232422	0.80317	Dairy_Lean_beef	871	871	0.0612162	0.608226	0.000616185	0.0397736	0.987643	0.987643	Dairy_Lean_beef	124.024	67.7014	114.844	632.135	0.0326389	-0.00434548	-0.133138	0.894084	0.996466	NS	NS	NS
