# Supplementary material for: Long-term dietary patterns are associated with pro-inflammatory and anti-inflammatory features of the gut microbiome
Source: Gut. 2021 Apr 2;70(7):1287–98. doi: 10.1136/gutjnl-2020-322670 (PMC8223641; doi:10.1136/gutjnl-2020-322670)
Supplement: Supplementary data [file gutjnl-2020-322670supp005.xlsx]

## Sheet: S4_Tax_clusters
Table S4. Associations of bacterial clusters with food clusters
Shown are all associations per cohort and pooled results of the meta-analysis. Statistically significant results of the meta-analysis are coloured:
Red = positive association (FDR < 0.05, het-p > 0.05); blue = negative association (FDR < 0.05, het-p > 0.05); Light red and light blue inidicate heterogeneous results (FDR < 0.05 but het-p < 0.05)
Methods
Unsupervised hierarchical clustering was used to identify food clusters and bacterial clusters, using squared Euclidean and Bray-curtis distance, respectively. Centroids were calculated as mean of all variables in a cluster.
In each cohort, a multivariate linear model of food clusters versus microbial clusters was constructed, adding age, sex, caloric intake and sequencing depth as covariates.
Next, an inverse-variance meta-analysis was performed, followed by multiple testing correction and a Cochran’s Q test
Species cluster	Food cluster	N.CD	non-zeros.CD	Mean.CD	SD.CD	Coef.CD	SE.CD	Pval.CD	Qval.CD	food.CD	N.UC	non-zeros.UC	Mean.UC	SD.UC	Coef.UC	SE.UC	Pval.UC	Qval.UC	food.UC	N.IBS	non-zeros.IBS	Mean.IBS	SD.IBS	Coef.IBS	SE.IBS	Pval.IBS	Qval.IBS	food.IBS	N.HC	non-zeros.HC	Mean.HC	SD.HC	Coef.HC	SE.HC	Pval.HC	Qval.HC	food.HC	inverse_var.cd	inverse_var.uc	inverse_var.ibs	inverse_var.hc	se	beta	Z	P	FDR	Het.Q	Het.I2	Het.Pval
S25_Lachnospiraceae bacterium 3 1 57FAA	Sweetened_tea_yoghurtdrink	205	205	0.111425	1.12755	0.597013	0.0581283	3.97391e-20	1.15243e-18	Sweetened_tea_yoghurtdrink	126	126	0.0674218	0.540567	-0.0700288	0.122192	0.567647	0.768655	Sweetened_tea_yoghurtdrink	223	223	0.00250442	0.480442	0.0676134	0.0940288	0.472871	0.806662	Sweetened_tea_yoghurtdrink	871	871	-0.0373747	0.434722	0.00198663	0.0852973	0.981424	0.981424	Sweetened_tea_yoghurtdrink	295.954	66.975	113.104	137.445	0.0403739	0.293276	7.26401	3.75782e-13	1.08977e-11	53.5654	0.943994	2.33572e-12
S24_Ruminococcus S24_Ruminococcus gnavus, Lachnospiraceae bacterium 1 1 57FAA, Lachnospiraceae bacterium	Fastfood	205	205	0.059247	0.613728	-0.138222	0.199859	0.490007	0.744536	Fastfood	126	126	0.0181697	0.719587	0.0434014	0.142195	0.760742	0.996213	Fastfood	223	223	-0.0641103	0.381483	0.277988	0.0653876	3.22024e-05	0.00093387	Fastfood	871	871	8.79047e-06	0.532809	0.110117	0.0270062	4.98636e-05	0.00144604	Fastfood	25.0352	49.4573	233.889	1371.11	0.0244012	0.127829	5.23863	1.61774e-07	4.69143e-06	7.82837	0.616778	0.0199568
S18_Lactobacillus delbrueckii	Dairy_Lean_beef	205	205	-0.201195	0.55624	0.220003	0.216503	0.310785	0.888966	Dairy_Lean_beef	126	126	-0.146976	0.56817	0.230393	0.180929	0.205341	0.900777	Dairy_Lean_beef	223	223	0.0254258	0.537627	0.22279	0.109694	0.0434733	0.33726	Dairy_Lean_beef	871	871	0.0612162	0.608226	0.190469	0.0464763	4.5555e-05	0.00132109	Dairy_Lean_beef	21.334	30.5481	83.1064	462.952	0.0408951	0.198055	4.843	1.27894e-06	3.70893e-05	0.119707	0	0.941902
S25_Lachnospiraceae bacterium 3 1 57FAA	Sugar_Sweets	205	205	0.184389	1.11711	0.436187	0.0731016	1.09058e-08	3.16268e-07	Sugar_Sweets	126	126	0.0308263	0.62208	0.142747	0.104182	0.17319	0.65727	Sugar_Sweets	223	223	-0.0900997	0.489801	0.125031	0.101553	0.219583	0.506409	Sugar_Sweets	871	871	-0.0242716	0.577625	0.0150749	0.0691769	0.827545	0.92303	Sugar_Sweets	187.131	92.1335	96.9653	208.967	0.0413379	0.188056	4.54924	5.38408e-06	0.000156138	18.3486	0.8365	0.00010367
28_Haemophilus, Veillonella	Vegetables_Fruit_Tea	205	205	-0.11222	0.77642	0.0641153	0.033438	0.0568791	0.412373	Vegetables_Fruit_Tea	126	126	-0.000156026	0.675955	0.0512459	0.0394906	0.197217	0.559607	Vegetables_Fruit_Tea	223	223	0.0418139	0.681131	0.0333881	0.0209479	0.112555	0.813179	Vegetables_Fruit_Tea	871	871	0.0161285	0.690431	0.0395856	0.0128954	0.00221286	0.0599317	Vegetables_Fruit_Tea	894.373	641.227	2278.86	6013.59	0.0100871	0.0411416	4.07863	4.53016e-05	0.00131375	0.689069	0	0.70855
S1_Acetate/butyrate producers	Wine_Alcohol	205	205	-0.27214	0.559289	0.111407	0.0660347	0.0931513	0.496752	Wine_Alcohol	126	126	-0.21131	0.583969	0.023571	0.0464234	0.612592	0.892704	Wine_Alcohol	223	223	-0.0117566	0.664384	0.0773964	0.0253132	0.00251336	0.0638683	Wine_Alcohol	871	871	0.0981863	0.783786	0.0286082	0.00984978	0.00377349	0.084271	Wine_Alcohol	229.327	464.008	1560.65	10307.3	0.00892241	0.0359953	4.03425	5.47761e-05	0.00158851	4.61329	0.349704	0.099595
S9_Bacteroides, Roseburia	Vegetables_Fruit_Tea	205	205	-0.11222	0.77642	0.0860996	0.0335294	0.0109693	0.28764	Vegetables_Fruit_Tea	126	126	-0.000156026	0.675955	0.110359	0.0516026	0.0344918	0.33342	Vegetables_Fruit_Tea	223	223	0.0418139	0.681131	0.10879	0.0355611	0.00249845	0.072455	Vegetables_Fruit_Tea	871	871	0.0161285	0.690431	0.0205597	0.0152353	0.177538	0.471364	Vegetables_Fruit_Tea	889.503	375.54	790.771	4308.22	0.0125353	0.0459824	3.66824	0.000244224	0.00354124	8.89182	0.662611	0.0117264
S20_Lactococcus lactis	Dairy_Lean_beef	205	205	-0.201195	0.55624	-0.0195776	0.0869049	0.821996	0.953515	Dairy_Lean_beef	126	126	-0.146976	0.56817	0.197485	0.154011	0.202218	0.900777	Dairy_Lean_beef	223	223	0.0254258	0.537627	0.10584	0.0661484	0.111138	0.33726	Dairy_Lean_beef	871	871	0.0612162	0.608226	0.0739848	0.0241113	0.00222369	0.0322435	Dairy_Lean_beef	132.407	42.1596	228.54	1720.12	0.0217021	0.0740312	3.41125	0.000646665	0.00937665	2.03401	0	0.361676
S1_Acetate/butyrate producers	Eggs_Alcoholic_drinks	205	205	-0.104303	0.43925	0.114667	0.0862937	0.185438	0.703885	Eggs_Alcoholic_drinks	126	126	-0.134042	0.302491	0.12548	0.0963745	0.195473	0.708588	Eggs_Alcoholic_drinks	223	223	-0.0546888	0.448173	0.0947394	0.0382662	0.0140626	0.135938	Eggs_Alcoholic_drinks	871	871	0.0583724	0.606478	0.0318812	0.0139747	0.0227716	0.220126	Eggs_Alcoholic_drinks	134.289	107.665	682.918	5120.54	0.0128614	0.0424879	3.30353	0.000954764	0.0138441	3.88177	0.227156	0.143577
S8_Eggerthella lenta, Gordonibacter pamelaeae	Eggs_Alcoholic_drinks	205	205	-0.104303	0.43925	-0.341579	0.142876	0.0177564	0.514935	Eggs_Alcoholic_drinks	126	126	-0.134042	0.302491	-0.424756	0.221385	0.0574882	0.565836	Eggs_Alcoholic_drinks	223	223	-0.0546888	0.448173	-0.096907	0.085279	0.25708	0.756933	Eggs_Alcoholic_drinks	871	871	0.0583724	0.606478	-0.0836369	0.0344105	0.0152819	0.220126	Eggs_Alcoholic_drinks	48.9871	20.4035	137.504	844.535	0.0308397	-0.10401	-3.37259	0.000744642	0.0138441	5.22132	0.425433	0.0734859
S13_Escherichia coli, Bacteroides fragilis	Bread_Legumes	205	205	-0.0736819	0.691941	-0.0973063	0.0802632	0.226879	0.65795	Bread_Legumes	126	126	0.0277121	0.583927	-0.0330947	0.0771107	0.668585	0.842998	Bread_Legumes	223	223	-0.116311	0.444079	-0.0892229	0.0520681	0.0880884	0.813769	Bread_Legumes	871	871	0.0435099	0.579569	-0.0616607	0.0217545	0.00469962	0.0680618	Bread_Legumes	155.227	168.179	368.856	2113.01	0.0188804	-0.0655447	-3.47156	0.000517439	0.0150057	0.572362	0	0.751127
S18_Lactobacillus delbrueckii	Dairy_Cereals	205	205	-0.161259	0.558239	0.249207	0.221234	0.261336	0.659005	Dairy_Cereals	126	126	-0.0521211	0.621192	0.265792	0.162608	0.104763	0.715198	Dairy_Cereals	223	223	-0.0111794	0.671357	0.144444	0.0876731	0.100898	0.919942	Dairy_Cereals	871	871	0.0462207	0.622802	0.108719	0.0456155	0.0173691	0.251852	Dairy_Cereals	20.4313	37.8195	130.097	480.591	0.038664	0.128838	3.33225	0.000861458	0.0249823	1.23159	0	0.540211
S18_Lactobacillus delbrueckii	Meat_Potatoes_Gravy	205	205	0.0092388	0.66643	0.2823	0.205063	0.170168	0.748138	Meat_Potatoes_Gravy	126	126	0.0317397	0.612627	0.497571	0.193883	0.0115076	0.0834302	Meat_Potatoes_Gravy	223	223	-0.12186	0.546907	0.390991	0.118263	0.00110697	0.0160511	Meat_Potatoes_Gravy	871	871	0.0247565	0.537179	0.05973	0.0590555	0.312098	0.905245	Meat_Potatoes_Gravy	23.7807	26.6023	71.4991	286.734	0.0494701	0.159152	3.21713	0.00129479	0.037549	10.0846	0.702518	0.00645876
S21_Clostridium bolteae, Coprobacillus	Fastfood	205	205	0.059247	0.613728	0.22056	0.152243	0.149009	0.744536	Fastfood	126	126	0.0181697	0.719587	0.104686	0.0778588	0.181586	0.938342	Fastfood	223	223	-0.0641103	0.381483	0.118779	0.062447	0.0586044	0.339905	Fastfood	871	871	8.79047e-06	0.532809	0.0436023	0.0208459	0.0367743	0.330433	Fastfood	43.1447	164.962	256.435	2301.23	0.0190148	0.0569762	2.99642	0.00273173	0.0396101	2.9211	0	0.232108
S11_Bacteroides faecis	Savoury_snacks	205	205	-0.0114351	0.501597	0.251278	0.149669	0.0947437	0.903607	Savoury_snacks	126	126	0.0331572	0.582506	0.414309	0.209901	0.0506985	0.53862	Savoury_snacks	223	223	-0.010086	0.411775	0.0604249	0.174672	0.729727	0.813927	Savoury_snacks	871	871	0.000932337	0.495994	0.157746	0.0687687	0.022037	0.343465	Savoury_snacks	44.641	22.6972	32.776	211.455	0.056653	0.1796	3.17017	0.00152349	0.0441813	2.0462	0	0.359479
S11_Bacteroides faecis	Pasta_Pizza	205	205	-0.126846	0.636288	0.295732	0.122586	0.0167534	0.121462	Pasta_Pizza	126	126	-0.0709619	0.607965	0.0109674	0.224597	0.961135	0.989316	Pasta_Pizza	223	223	0.00315542	0.506156	0.0701301	0.165007	0.671248	0.846356	Pasta_Pizza	871	871	0.0399249	0.617093	0.147425	0.0605018	0.0150227	0.435659	Pasta_Pizza	66.5453	19.824	36.7279	273.189	0.0502337	0.158339	3.15204	0.00162133	0.0470185	2.00502	0	0.366957
S11_Bacteroides faecis	Vegetables_Fruit_Tea	205	205	-0.11222	0.77642	-0.0719695	0.0959101	0.453909	0.82677	Vegetables_Fruit_Tea	126	126	-0.000156026	0.675955	-0.0491431	0.18763	0.793836	0.920849	Vegetables_Fruit_Tea	223	223	0.0418139	0.681131	0.252859	0.103858	0.0157138	0.227851	Vegetables_Fruit_Tea	871	871	0.0161285	0.690431	0.122911	0.0463559	0.00816122	0.0788918	Vegetables_Fruit_Tea	108.71	28.4051	92.7082	465.361	0.0379271	0.102736	2.70876	0.0067535	0.0524594	6.25206	0.520158	0.0438917
S23_B. hydrogenotrophica	Vegetables_Fruit_Tea	205	205	-0.11222	0.77642	0.0729667	0.123833	0.556371	0.82677	Vegetables_Fruit_Tea	126	126	-0.000156026	0.675955	-0.41576	0.217611	0.0584473	0.386482	Vegetables_Fruit_Tea	223	223	0.0418139	0.681131	-0.136245	0.099372	0.171772	0.813179	Vegetables_Fruit_Tea	871	871	0.0161285	0.690431	-0.088168	0.0374999	0.018939	0.137308	Vegetables_Fruit_Tea	65.2122	21.1172	101.268	711.113	0.0333572	-0.0895907	-2.68579	0.00723578	0.0524594	4.19167	0.284294	0.122968
S8_Eggerthella lenta, Gordonibacter pamelaeae	Coffee_milk_Soup	205	205	-0.0190486	0.599621	0.0997484	0.110579	0.368127	0.765539	Coffee_milk_Soup	126	126	0.00261508	0.755444	0.181668	0.083533	0.0316745	0.45928	Coffee_milk_Soup	223	223	-0.00397076	0.684592	0.12978	0.055466	0.0202151	0.293119	Coffee_milk_Soup	871	871	0.00528062	0.524601	0.0474941	0.0368863	0.198244	0.674534	Coffee_milk_Soup	81.782	143.312	325.047	734.97	0.0278952	0.0865949	3.10429	0.00190735	0.0553132	3.0394	0.0129626	0.218778
S3_Faecalibacterium_prausnitzii_Bifidobacterium_bifidum	Vegetables_Fruit_Tea	205	205	-0.11222	0.77642	-0.0829602	0.0658942	0.209516	0.611239	Vegetables_Fruit_Tea	126	126	-0.000156026	0.675955	-0.134089	0.142766	0.349517	0.675734	Vegetables_Fruit_Tea	223	223	0.0418139	0.681131	0.0651526	0.0650476	0.317656	0.813179	Vegetables_Fruit_Tea	871	871	0.0161285	0.690431	-0.094799	0.032968	0.00413322	0.0599317	Vegetables_Fruit_Tea	230.306	49.0627	236.34	920.056	0.0263911	-0.0679131	-2.57333	0.0100725	0.0584208	5.11683	0.413699	0.0774275
28_Haemophilus, Veillonella	Sugar_Sweets	205	205	0.184389	1.11711	-0.0440482	0.0260594	0.0928249	0.38456	Sugar_Sweets	126	126	0.0308263	0.62208	-0.0528902	0.038569	0.173173	0.65727	Sugar_Sweets	223	223	-0.0900997	0.489801	-0.0673169	0.0294045	0.0231089	0.111693	Sugar_Sweets	871	871	-0.0242716	0.577625	-0.0163589	0.0162789	0.315233	0.879516	Sugar_Sweets	1472.55	672.238	1156.57	3773.56	0.0118888	-0.0339235	-2.8534	0.00432547	0.0627193	2.84669	0	0.240907
S1_Acetate/butyrate producers	Bread_Legumes	205	205	-0.0736819	0.691941	0.136053	0.0601849	0.0248672	0.360574	Bread_Legumes	126	126	0.0277121	0.583927	-0.00296559	0.052818	0.95532	0.962141	Bread_Legumes	223	223	-0.116311	0.444079	-0.0963884	0.0426555	0.0248379	0.720298	Bread_Legumes	871	871	0.0435099	0.579569	-0.0448893	0.0151596	0.00314982	0.0680618	Bread_Legumes	276.074	358.457	549.604	4351.34	0.0134407	-0.0382635	-2.84683	0.00441569	0.0640275	10.8834	0.72435	0.0043322
S9_Bacteroides, Roseburia	Fish_Nuts	205	205	-0.135461	0.55016	0.0492644	0.047734	0.303302	0.830217	Fish_Nuts	126	126	0.0141888	0.575752	0.0191576	0.0585488	0.744081	0.922457	Fish_Nuts	223	223	0.0520077	0.656703	0.148487	0.0355458	4.27383e-05	0.00123941	Fish_Nuts	871	871	0.0168252	0.570004	0.0201258	0.018632	0.280366	0.813063	Fish_Nuts	438.878	291.718	791.449	2880.58	0.0150711	0.0460416	3.05496	0.00225087	0.0652752	10.4564	0.713096	0.00536305
S15_Parabacteroides johnsonii	Vegetables_Fruit_Tea	205	205	-0.11222	0.77642	-0.124257	0.138638	0.371193	0.82677	Vegetables_Fruit_Tea	126	126	-0.000156026	0.675955	-0.0782736	0.163037	0.632032	0.885561	Vegetables_Fruit_Tea	223	223	0.0418139	0.681131	-0.0849116	0.0754022	0.261361	0.813179	Vegetables_Fruit_Tea	871	871	0.0161285	0.690431	-0.0849333	0.0435082	0.051246	0.235988	Vegetables_Fruit_Tea	52.0276	37.6209	175.886	528.273	0.035493	-0.0871902	-2.45655	0.0140279	0.0678016	0.0780786	0	0.961713
S6_Bifidobacterium_pseudocatenulatum	Dairy_Lean_beef	205	205	-0.201195	0.55624	-0.173193	0.174924	0.323325	0.888966	Dairy_Lean_beef	126	126	-0.146976	0.56817	0.040146	0.204788	0.844913	0.947445	Dairy_Lean_beef	223	223	0.0254258	0.537627	-0.249673	0.123069	0.0437078	0.33726	Dairy_Lean_beef	871	871	0.0612162	0.608226	-0.10061	0.0502262	0.045474	0.188392	Dairy_Lean_beef	32.6813	23.8447	66.0241	396.406	0.043897	-0.117678	-2.68078	0.00734512	0.0710028	1.96046	0	0.375225
S8_Eggerthella lenta, Gordonibacter pamelaeae	Sweetened_tea_yoghurtdrink	205	205	0.111425	1.12755	0.173174	0.0564417	0.00245673	0.014249	Sweetened_tea_yoghurtdrink	126	126	0.0674218	0.540567	0.00754462	0.120772	0.950296	0.950296	Sweetened_tea_yoghurtdrink	223	223	0.00250442	0.480442	0.0162239	0.0800698	0.839623	0.901817	Sweetened_tea_yoghurtdrink	871	871	-0.0373747	0.434722	0.0629617	0.0439682	0.152518	0.801801	Sweetened_tea_yoghurtdrink	313.906	68.5597	155.978	517.276	0.030777	0.0852278	2.76921	0.00561928	0.0814795	3.84079	0.21891	0.146549
S23_B. hydrogenotrophica	Eggs_Alcoholic_drinks	205	205	-0.104303	0.43925	0.174554	0.223947	0.436646	0.706598	Eggs_Alcoholic_drinks	126	126	-0.134042	0.302491	-0.353982	0.496565	0.477316	0.934549	Eggs_Alcoholic_drinks	223	223	-0.0546888	0.448173	0.505649	0.144784	0.000579893	0.00840844	Eggs_Alcoholic_drinks	871	871	0.0583724	0.606478	0.0691217	0.046325	0.136037	0.654942	Eggs_Alcoholic_drinks	19.9392	4.05552	47.7044	465.981	0.0431259	0.10857	2.51752	0.0118186	0.0856848	9.20127	0.673958	0.0100454
S24_Ruminococcus S24_Ruminococcus gnavus, Lachnospiraceae bacterium 1 1 57FAA, Lachnospiraceae bacterium	Eggs_Alcoholic_drinks	205	205	-0.104303	0.43925	0.141092	0.194744	0.469618	0.706598	Eggs_Alcoholic_drinks	126	126	-0.134042	0.302491	-0.303501	0.205499	0.142414	0.610996	Eggs_Alcoholic_drinks	223	223	-0.0546888	0.448173	0.17232	0.0429139	8.3084e-05	0.00240944	Eggs_Alcoholic_drinks	871	871	0.0583724	0.606478	0.0204586	0.0178355	0.251679	0.668229	Eggs_Alcoholic_drinks	26.3676	23.6798	543.006	3143.62	0.016359	0.041325	2.52613	0.0115326	0.0856848	13.7647	0.782051	0.00102575
S18_Lactobacillus delbrueckii	Spreads_sweet	205	205	-0.0555374	0.536875	0.429966	0.227887	0.0606498	0.400541	Spreads_sweet	126	126	0.0129582	0.465282	-0.161941	0.228868	0.480583	0.978735	Spreads_sweet	223	223	-0.0241369	0.470388	0.0820427	0.127415	0.52032	0.807729	Spreads_sweet	871	871	0.0180257	0.519839	0.135348	0.0544294	0.0130822	0.185922	Spreads_sweet	19.2558	19.091	61.5965	337.546	0.0478097	0.127837	2.67387	0.00749807	0.0932125	3.50902	0.14506	0.172992
S23_B. hydrogenotrophica	Spreads_sweet	205	205	-0.0555374	0.536875	-0.297525	0.185591	0.110494	0.400541	Spreads_sweet	126	126	0.0129582	0.465282	0.0647408	0.31496	0.837489	0.978735	Spreads_sweet	223	223	-0.0241369	0.470388	-0.229657	0.151003	0.129747	0.418072	Spreads_sweet	871	871	0.0180257	0.519839	-0.114704	0.051098	0.0250341	0.185922	Spreads_sweet	29.0326	10.0806	43.856	382.994	0.0463259	-0.133032	-2.87165	0.00408331	0.0932125	1.71797	0	0.423592
S5_Streptococcus, Bifidobacterium dentium	Spreads_sweet	205	205	-0.0555374	0.536875	0.00739857	0.0568195	0.89654	0.96295	Spreads_sweet	126	126	0.0129582	0.465282	-0.0239418	0.0830631	0.773714	0.978735	Spreads_sweet	223	223	-0.0241369	0.470388	0.046595	0.0283578	0.102013	0.396589	Spreads_sweet	871	871	0.0180257	0.519839	0.0310652	0.0141654	0.0285873	0.185922	Spreads_sweet	309.745	144.938	1243.53	4983.62	0.0122335	0.0316651	2.58839	0.00964267	0.0932125	0.909544	0	0.634593
S7_Alistipes, Bacteroides	Fish_Nuts	205	205	-0.135461	0.55016	0.112218	0.0607474	0.0661903	0.785922	Fish_Nuts	126	126	0.0141888	0.575752	0.073887	0.0622506	0.2376	0.810424	Fish_Nuts	223	223	0.0520077	0.656703	0.0143653	0.0393904	0.715697	0.806477	Fish_Nuts	871	871	0.0168252	0.570004	0.0485797	0.0229414	0.0344973	0.43476	Fish_Nuts	270.984	258.056	644.494	1900.04	0.0180376	0.0491408	2.72436	0.00644271	0.0934193	2.0162	0	0.364911
S12_Bacteroides finegoldii	Spreads_sweet	205	205	-0.0555374	0.536875	-0.148961	0.190954	0.436264	0.740598	Spreads_sweet	126	126	0.0129582	0.465282	-0.0568453	0.247967	0.819068	0.978735	Spreads_sweet	223	223	-0.0241369	0.470388	-0.135674	0.146196	0.354424	0.73693	Spreads_sweet	871	871	0.0180257	0.519839	-0.128884	0.0590871	0.0294333	0.185922	Spreads_sweet	27.4249	16.2635	46.7877	286.427	0.0515092	-0.128079	-2.48653	0.0128996	0.0935218	0.097368	0	0.952482
S14_Odoribacter	Sweetened_tea_yoghurtdrink	205	205	0.111425	1.12755	0.115676	0.0375051	0.00235689	0.014249	Sweetened_tea_yoghurtdrink	126	126	0.0674218	0.540567	0.266368	0.183908	0.150119	0.618139	Sweetened_tea_yoghurtdrink	223	223	0.00250442	0.480442	-0.0409712	0.0992658	0.680225	0.877896	Sweetened_tea_yoghurtdrink	871	871	-0.0373747	0.434722	-0.00171163	0.0628904	0.978294	0.981424	Sweetened_tea_yoghurtdrink	710.916	29.5666	101.485	252.832	0.0302227	0.0781154	2.58466	0.00974744	0.0942252	5.10111	0.411893	0.0780382
S14_Odoribacter	Sugar_Sweets	205	205	0.184389	1.11711	0.152623	0.0409146	0.000254993	0.00369739	Sugar_Sweets	126	126	0.0308263	0.62208	0.0701059	0.159051	0.660168	0.911661	Sugar_Sweets	223	223	-0.0900997	0.489801	-0.115372	0.110071	0.295792	0.506409	Sugar_Sweets	871	871	-0.0242716	0.577625	-0.00157191	0.0510027	0.97542	0.97542	Sugar_Sweets	597.371	39.53	82.5377	384.426	0.0300983	0.0759307	2.52276	0.0116439	0.109927	NS	NS	NS
S22_Mucin degraders	Sugar_Sweets	205	205	0.184389	1.11711	0.0164304	0.0306649	0.592698	0.93287	Sugar_Sweets	126	126	0.0308263	0.62208	0.139859	0.0701534	0.0484812	0.65727	Sugar_Sweets	223	223	-0.0900997	0.489801	0.138298	0.0807408	0.0881999	0.2842	Sugar_Sweets	871	871	-0.0242716	0.577625	0.0438847	0.0308488	0.155222	0.879516	Sugar_Sweets	1063.45	203.19	153.396	1050.81	0.0201177	0.0458223	2.27771	0.0227436	0.109927	NS	NS	NS
S23_B. hydrogenotrophica	Sugar_Sweets	205	205	0.184389	1.11711	-0.0510306	0.0985923	0.605318	0.93287	Sugar_Sweets	126	126	0.0308263	0.62208	0.47104	0.224959	0.0383746	0.65727	Sugar_Sweets	223	223	-0.0900997	0.489801	0.0579227	0.150446	0.700609	0.781449	Sugar_Sweets	871	871	-0.0242716	0.577625	0.119145	0.048293	0.0138125	0.200282	Sugar_Sweets	102.876	19.7603	44.1814	428.777	0.0409755	0.0968847	2.36445	0.0180567	0.109927	NS	NS	NS
S5_Streptococcus, Bifidobacterium dentium	Sugar_Sweets	205	205	0.184389	1.11711	-0.0216716	0.035507	0.542377	0.93287	Sugar_Sweets	126	126	0.0308263	0.62208	0.00489176	0.0598004	0.934955	0.951887	Sugar_Sweets	223	223	-0.0900997	0.489801	-0.0105484	0.0270871	0.697398	0.781449	Sugar_Sweets	871	871	-0.0242716	0.577625	0.0433847	0.013598	0.00147469	0.0427661	Sugar_Sweets	793.18	279.635	1362.93	5408.19	0.011291	0.0260627	2.30827	0.020984	0.109927	NS	NS	NS
28_Haemophilus, Veillonella	Savoury_snacks	205	205	-0.0114351	0.501597	-0.0324715	0.05843	0.579133	0.976642	Savoury_snacks	126	126	0.0331572	0.582506	-0.0327135	0.0439046	0.457858	0.816348	Savoury_snacks	223	223	-0.010086	0.411775	-0.0337783	0.0344658	0.32825	0.613312	Savoury_snacks	871	871	0.000932337	0.495994	-0.0424101	0.0187127	0.0236873	0.343465	Savoury_snacks	292.906	518.775	841.829	2855.8	0.0148917	-0.0390376	-2.62143	0.00875624	0.126966	NS	NS	NS
S4_Bifidobacterium_catenulatum	Ready_meals	205	205	-0.0761095	0.668047	-0.104657	0.124254	0.400642	0.800861	Ready_meals	126	126	-0.0726462	0.963861	0.00146216	0.0649158	0.982067	0.982067	Ready_meals	223	223	0.0593805	0.744316	0.00300396	0.0872909	0.972579	0.993664	Ready_meals	871	871	0.0135936	0.640699	-0.0925239	0.0315959	0.00350249	0.101572	Ready_meals	64.7703	237.301	131.239	1001.7	0.0263981	-0.068793	-2.60599	0.00916101	0.132835	NS	NS	NS
S6_Bifidobacterium_pseudocatenulatum	Ready_meals	205	205	-0.0761095	0.668047	-0.223717	0.146342	0.12792	0.564307	Ready_meals	126	126	-0.0726462	0.963861	-0.0439566	0.125886	0.727567	0.982067	Ready_meals	223	223	0.0593805	0.744316	-0.164047	0.0842813	0.0528947	0.993664	Ready_meals	871	871	0.0135936	0.640699	-0.080932	0.0488852	0.0981752	0.474514	Ready_meals	46.6942	63.1027	140.779	418.452	0.0386614	-0.104899	-2.71328	0.00666204	0.132835	NS	NS	NS
S16_Propionate/succinate producers	Eggs_Alcoholic_drinks	205	205	-0.104303	0.43925	0.0731031	0.0643623	0.257484	0.703885	Eggs_Alcoholic_drinks	126	126	-0.134042	0.302491	-0.0526704	0.199325	0.792045	0.986032	Eggs_Alcoholic_drinks	223	223	-0.0546888	0.448173	-0.0192156	0.0892942	0.829822	0.925571	Eggs_Alcoholic_drinks	871	871	0.0583724	0.606478	0.100118	0.0421725	0.0178144	0.220126	Eggs_Alcoholic_drinks	241.4	25.1697	125.416	562.265	0.0323719	0.0735702	2.27265	0.0230471	0.133673	NS	NS	NS
S21_Clostridium bolteae, Coprobacillus	Pasta_Pizza	205	205	-0.126846	0.636288	-0.205134	0.105598	0.0534972	0.264213	Pasta_Pizza	126	126	-0.0709619	0.607965	-0.00444098	0.0574545	0.938531	0.989316	Pasta_Pizza	223	223	0.00315542	0.506156	-0.0772708	0.0410967	0.0615391	0.37494	Pasta_Pizza	871	871	0.0399249	0.617093	-0.0272826	0.0142342	0.0556222	0.438792	Pasta_Pizza	89.6788	302.937	592.088	4935.52	0.0129966	-0.0338072	-2.60123	0.00928904	0.134691	NS	NS	NS
S20_Lactococcus lactis	Meat	205	205	0.0153272	0.592254	-0.080178	0.0817346	0.327806	0.814157	Meat	126	126	0.00509592	0.600788	0.103617	0.147896	0.484906	0.809849	Meat	223	223	-0.0138947	0.560121	-0.136475	0.0609888	0.026321	0.43198	Meat	871	871	-0.0016754	0.624155	-0.0505293	0.0236474	0.0329168	0.41389	Meat	149.688	45.718	268.844	1788.27	0.0210701	-0.0596288	-2.83003	0.00465441	0.134978	NS	NS	NS
28_Haemophilus, Veillonella	Dairy_Cereals	205	205	-0.161259	0.558239	0.0722214	0.0535255	0.179059	0.65448	Dairy_Cereals	126	126	-0.0521211	0.621192	0.0365657	0.0389221	0.349632	0.958129	Dairy_Cereals	223	223	-0.0111794	0.671357	-0.00869533	0.020925	0.678188	0.919942	Dairy_Cereals	871	871	0.0462207	0.622802	0.0420368	0.0143323	0.00345041	0.100062	Dairy_Cereals	349.043	660.096	2283.87	4868.17	0.0110694	0.0286881	2.59166	0.00955144	0.138496	NS	NS	NS
S2_Bifidobacterium animalis	Dairy_Lean_beef	205	205	-0.201195	0.55624	0.0278705	0.0682805	0.683583	0.943996	Dairy_Lean_beef	126	126	-0.146976	0.56817	0.0446474	0.197588	0.821616	0.947445	Dairy_Lean_beef	223	223	0.0254258	0.537627	0.351339	0.175586	0.0466433	0.33726	Dairy_Lean_beef	871	871	0.0612162	0.608226	0.113486	0.0557659	0.042152	0.188392	Dairy_Lean_beef	214.49	25.614	32.4355	321.56	0.0410271	0.0925936	2.25689	0.0240149	0.139287	NS	NS	NS
S4_Bifidobacterium_catenulatum	Dairy_Lean_beef	205	205	-0.201195	0.55624	-0.177011	0.147754	0.232335	0.854193	Dairy_Lean_beef	126	126	-0.146976	0.56817	0.143452	0.104752	0.173416	0.900777	Dairy_Lean_beef	223	223	0.0254258	0.537627	-0.185463	0.126936	0.145439	0.383431	Dairy_Lean_beef	871	871	0.0612162	0.608226	-0.0745993	0.0318584	0.0194413	0.146326	Dairy_Lean_beef	45.8062	91.1334	62.0631	985.266	0.0290586	-0.0675907	-2.32601	0.0200179	0.139287	NS	NS	NS
28_Haemophilus, Veillonella	Dairy_Lean_beef	205	205	-0.201195	0.55624	-0.0112165	0.0497667	0.821957	0.953515	Dairy_Lean_beef	126	126	-0.146976	0.56817	0.0456802	0.0428997	0.289381	0.924779	Dairy_Lean_beef	223	223	0.0254258	0.537627	0.0266548	0.0263299	0.312605	0.69735	Dairy_Lean_beef	871	871	0.0612162	0.608226	0.0271057	0.0148793	0.0688635	0.221893	Dairy_Lean_beef	403.76	543.364	1442.45	4516.86	0.012033	0.0262325	2.18005	0.0292539	0.141394	NS	NS	NS
S12_Bacteroides finegoldii	Dairy_Lean_beef	205	205	-0.201195	0.55624	-0.108585	0.180391	0.547897	0.943996	Dairy_Lean_beef	126	126	-0.146976	0.56817	-0.0913357	0.196803	0.643419	0.947445	Dairy_Lean_beef	223	223	0.0254258	0.537627	0.174121	0.126633	0.170546	0.412154	Dairy_Lean_beef	871	871	0.0612162	0.608226	0.106452	0.0507704	0.036307	0.188392	Dairy_Lean_beef	30.7307	25.8188	62.3603	387.953	0.0444176	0.091665	2.06371	0.0390453	0.141539	NS	NS	NS
S19_Streptococci, L. sakei	Dairy_Lean_beef	205	205	-0.201195	0.55624	0.0741054	0.0450222	0.101458	0.735571	Dairy_Lean_beef	126	126	-0.146976	0.56817	0.0525541	0.0854692	0.539864	0.924779	Dairy_Lean_beef	223	223	0.0254258	0.537627	0.118252	0.066568	0.0771138	0.33726	Dairy_Lean_beef	871	871	0.0612162	0.608226	0.0204169	0.0244769	0.404448	0.66092	Dairy_Lean_beef	493.339	136.893	225.667	1669.12	0.0199007	0.0413927	2.07996	0.037529	0.141539	NS	NS	NS
S15_Parabacteroides johnsonii	Bread_Legumes	205	205	-0.0736819	0.691941	0.010201	0.176784	0.954043	0.976539	Bread_Legumes	126	126	0.0277121	0.583927	0.0679009	0.191983	0.724198	0.875072	Bread_Legumes	223	223	-0.116311	0.444079	-0.0896191	0.124713	0.473159	0.860954	Bread_Legumes	871	871	0.0435099	0.579569	-0.150789	0.0581865	0.00971776	0.0704538	Bread_Legumes	31.9972	27.1316	64.2947	295.362	0.0488657	-0.114929	-2.35194	0.0186759	0.142649	NS	NS	NS
S24_Ruminococcus S24_Ruminococcus gnavus, Lachnospiraceae bacterium 1 1 57FAA, Lachnospiraceae bacterium	Bread_Legumes	205	205	-0.0736819	0.691941	-0.104732	0.136841	0.444976	0.860288	Bread_Legumes	126	126	0.0277121	0.583927	-0.0144676	0.107155	0.892834	0.962141	Bread_Legumes	223	223	-0.116311	0.444079	-0.0563695	0.0491282	0.252549	0.813769	Bread_Legumes	871	871	0.0435099	0.579569	-0.0381352	0.0192658	0.0480956	0.232462	Bread_Legumes	53.4035	87.0908	414.322	2694.17	0.0175439	-0.0409207	-2.33247	0.0196758	0.142649	NS	NS	NS
S11_Bacteroides faecis	Fish_Nuts	205	205	-0.135461	0.55016	0.141445	0.134482	0.294178	0.830217	Fish_Nuts	126	126	0.0141888	0.575752	0.130803	0.208754	0.532117	0.90773	Fish_Nuts	223	223	0.0520077	0.656703	0.336123	0.104627	0.00151549	0.0219746	Fish_Nuts	871	871	0.0168252	0.570004	0.0304964	0.0568899	0.592055	0.953867	Fish_Nuts	55.2932	22.9473	91.3508	308.979	0.0457117	0.106464	2.32903	0.0198575	0.145073	NS	NS	NS
S12_Bacteroides finegoldii	Fish_Nuts	205	205	-0.135461	0.55016	0.100507	0.178034	0.573025	0.864	Fish_Nuts	126	126	0.0141888	0.575752	0.0738195	0.193642	0.703717	0.922457	Fish_Nuts	223	223	0.0520077	0.656703	0.0939	0.0977603	0.337866	0.612383	Fish_Nuts	871	871	0.0168252	0.570004	0.106509	0.0530479	0.0449752	0.43476	Fish_Nuts	31.5495	26.6687	104.634	355.357	0.0439286	0.101916	2.32003	0.0203393	0.145073	NS	NS	NS
S3_Faecalibacterium_prausnitzii_Bifidobacterium_bifidum	Fish_Nuts	205	205	-0.135461	0.55016	-0.106755	0.0923806	0.249239	0.830217	Fish_Nuts	126	126	0.0141888	0.575752	-0.0216071	0.159361	0.892378	0.943406	Fish_Nuts	223	223	0.0520077	0.656703	-0.0963644	0.0659369	0.145348	0.509322	Fish_Nuts	871	871	0.0168252	0.570004	-0.0576959	0.0404406	0.154033	0.638138	Fish_Nuts	117.176	39.3762	230.008	611.455	0.0316542	-0.0709437	-2.24121	0.0250126	0.145073	NS	NS	NS
S27_Turicibacter_sanguinis	Meat	205	205	0.0153272	0.592254	-0.0528469	0.0508578	0.300013	0.814157	Meat	126	126	0.00509592	0.600788	0.0995362	0.148046	0.502665	0.809849	Meat	223	223	-0.0138947	0.560121	-0.0343045	0.0233756	0.143947	0.634441	Meat	871	871	-0.0016754	0.624155	-0.0820688	0.0360658	0.0231331	0.41389	Meat	386.621	45.6253	1830.11	768.791	0.0181634	-0.0467694	-2.57493	0.010026	0.145377	NS	NS	NS
S5_Streptococcus, Bifidobacterium dentium	Fish_Nuts	205	205	-0.135461	0.55016	-0.0295361	0.052377	0.573492	0.864	Fish_Nuts	126	126	0.0141888	0.575752	-0.0677582	0.0639277	0.291525	0.810424	Fish_Nuts	223	223	0.0520077	0.656703	-0.012513	0.0186816	0.503796	0.734777	Fish_Nuts	871	871	0.0168252	0.570004	-0.0235844	0.012659	0.0628159	0.455415	Fish_Nuts	364.518	244.693	2865.31	6240.22	0.0101458	-0.0216549	-2.13438	0.0328115	0.158589	NS	NS	NS
S19_Streptococci, L. sakei	Fastfood	205	205	0.059247	0.613728	0.0409573	0.0591814	0.48976	0.744536	Fastfood	126	126	0.0181697	0.719587	0.171202	0.115709	0.141765	0.938342	Fastfood	223	223	-0.0641103	0.381483	0.329717	0.118885	0.00604639	0.0876727	Fastfood	871	871	8.79047e-06	0.532809	0.0467862	0.0401177	0.243858	0.566579	Fastfood	285.516	74.6902	70.7537	621.338	0.030827	0.073059	2.36997	0.0177895	0.171965	NS	NS	NS
S27_Turicibacter_sanguinis	Pastry_Cream	205	205	-0.0651555	0.556024	0.015208	0.0536527	0.777124	0.927944	Pastry_Cream	126	126	0.0592037	0.832987	-0.0855552	0.125248	0.495869	0.842478	Pastry_Cream	223	223	-0.0509842	0.476141	0.0741476	0.0271969	0.00702707	0.101893	Pastry_Cream	871	871	0.0200538	0.596495	0.0504313	0.0376065	0.180286	0.837149	Pastry_Cream	347.39	63.7469	1351.95	707.089	0.0201204	0.0549485	2.73099	0.0063145	0.183121	NS	NS	NS
S20_Lactococcus lactis	Dairy_Cereals	205	205	-0.161259	0.558239	0.195778	0.0877775	0.0268383	0.369189	Dairy_Cereals	126	126	-0.0521211	0.621192	0.262642	0.137892	0.0592147	0.715198	Dairy_Cereals	223	223	-0.0111794	0.671357	0.0180914	0.0512404	0.724402	0.919942	Dairy_Cereals	871	871	0.0462207	0.622802	0.0343259	0.022865	0.133685	0.430762	Dairy_Cereals	129.788	52.5919	380.869	1912.75	0.0200967	0.0451413	2.2462	0.024691	0.183234	NS	NS	NS
S24_Ruminococcus S24_Ruminococcus gnavus, Lachnospiraceae bacterium 1 1 57FAA, Lachnospiraceae bacterium	Dairy_Cereals	205	205	-0.161259	0.558239	-0.135125	0.156354	0.388515	0.659005	Dairy_Cereals	126	126	-0.0521211	0.621192	-0.116283	0.0953477	0.225104	0.816001	Dairy_Cereals	223	223	-0.0111794	0.671357	-0.0303444	0.0309976	0.328764	0.919942	Dairy_Cereals	871	871	0.0462207	0.622802	-0.0287232	0.0163887	0.0800322	0.420601	Dairy_Cereals	40.9057	109.997	1040.74	3723.17	0.0142642	-0.0319117	-2.23719	0.0252737	0.183234	NS	NS	NS
S1_Acetate/butyrate producers	Pasta_Pizza	205	205	-0.126846	0.636288	0.193037	0.0604907	0.00164667	0.0286344	Pasta_Pizza	126	126	-0.0709619	0.607965	0.0475725	0.0524812	0.366552	0.989316	Pasta_Pizza	223	223	0.00315542	0.506156	0.0913599	0.0402708	0.0242785	0.37494	Pasta_Pizza	871	871	0.0399249	0.617093	0.00933137	0.0148396	0.529638	0.936609	Pasta_Pizza	273.289	363.071	616.622	4541.03	0.0131374	0.0291224	2.21675	0.02664	0.19314	NS	NS	NS
S12_Bacteroides finegoldii	Pasta_Pizza	205	205	-0.126846	0.636288	0.233652	0.163481	0.154505	0.370095	Pasta_Pizza	126	126	-0.0709619	0.607965	-0.127541	0.207801	0.540532	0.989316	Pasta_Pizza	223	223	0.00315542	0.506156	0.263624	0.149955	0.0801544	0.37494	Pasta_Pizza	871	871	0.0399249	0.617093	0.0916821	0.0566457	0.105915	0.438792	Pasta_Pizza	37.4169	23.1582	44.4709	311.649	0.0489881	0.110597	2.25763	0.023969	0.19314	NS	NS	NS
S2_Bifidobacterium animalis	Fastfood	205	205	0.059247	0.613728	-0.123184	0.0885292	0.165641	0.744536	Fastfood	126	126	0.0181697	0.719587	-0.126737	0.267598	0.636638	0.996213	Fastfood	223	223	-0.0641103	0.381483	-0.540869	0.304417	0.0770128	0.372228	Fastfood	871	871	8.79047e-06	0.532809	-0.108987	0.0905918	0.229283	0.566579	Fastfood	127.593	13.9648	10.791	121.849	0.0603904	-0.133494	-2.21052	0.0270691	0.196251	NS	NS	NS
S13_Escherichia coli, Bacteroides fragilis	Sweetened_tea_yoghurtdrink	205	205	0.111425	1.12755	0.0968937	0.0447855	0.0317443	0.153431	Sweetened_tea_yoghurtdrink	126	126	0.0674218	0.540567	0.0348258	0.0826462	0.674255	0.814725	Sweetened_tea_yoghurtdrink	223	223	0.00250442	0.480442	-0.0256042	0.0438036	0.559499	0.853973	Sweetened_tea_yoghurtdrink	871	871	-0.0373747	0.434722	0.0490074	0.0258244	0.0580701	0.561344	Sweetened_tea_yoghurtdrink	498.568	146.404	521.171	1499.48	0.0193687	0.0425973	2.19928	0.0278579	0.20197	NS	NS	NS
S25_Lachnospiraceae bacterium 3 1 57FAA	Vegetables_Fruit_Tea	205	205	-0.11222	0.77642	0.00746162	0.0997103	0.940423	0.940423	Vegetables_Fruit_Tea	126	126	-0.000156026	0.675955	-0.15364	0.100288	0.128159	0.464575	Vegetables_Fruit_Tea	223	223	0.0418139	0.681131	-0.100736	0.0672321	0.1355	0.813179	Vegetables_Fruit_Tea	871	871	0.0161285	0.690431	-0.0463527	0.0536776	0.388081	0.756174	Vegetables_Fruit_Tea	100.582	99.4265	221.231	347.067	0.0360772	-0.0688511	-1.90844	0.0563344	0.204212	NS	NS	NS
S6_Bifidobacterium_pseudocatenulatum	Vegetables_Fruit_Tea	205	205	-0.11222	0.77642	-0.039527	0.123213	0.748698	0.860185	Vegetables_Fruit_Tea	126	126	-0.000156026	0.675955	0.256926	0.179314	0.154507	0.497856	Vegetables_Fruit_Tea	223	223	0.0418139	0.681131	8.84459e-05	0.0940681	0.999251	0.999251	Vegetables_Fruit_Tea	871	871	0.0161285	0.690431	0.0892303	0.0429115	0.0378743	0.219671	Vegetables_Fruit_Tea	65.8696	31.1009	113.009	543.066	0.0364409	0.0715162	1.96252	0.0497015	0.204212	NS	NS	NS
S5_Streptococcus, Bifidobacterium dentium	Pastry_Sweets	205	205	-0.0467602	0.641192	-0.0187474	0.0488341	0.701491	0.934575	Pastry_Sweets	126	126	0.0864701	0.764689	0.0213684	0.0703063	0.761759	0.985666	Pastry_Sweets	223	223	0.04413	0.575045	0.0148305	0.0238745	0.535223	0.862303	Pastry_Sweets	871	871	-0.0122277	0.629675	0.0376199	0.0130074	0.00392793	0.11391	Pastry_Sweets	419.328	202.307	1754.41	5910.39	0.0109854	0.0295457	2.68955	0.00715494	0.207493	NS	NS	NS
S17_Alistipes	Dairy_lf	205	205	-0.0789894	0.503158	0.0597364	0.216388	0.782787	0.953416	Dairy_lf	126	126	-0.0346258	0.518191	-0.271734	0.186151	0.146971	0.538781	Dairy_lf	223	223	0.0070026	0.453292	-0.0549929	0.129048	0.670426	0.774319	Dairy_lf	871	871	0.0221807	0.682257	0.141266	0.0422312	0.000858061	0.0248838	Dairy_lf	21.3567	28.8583	60.0479	560.703	0.0386056	0.103344	2.67691	0.0074305	0.215484	NS	NS	NS
S9_Bacteroides, Roseburia	Dairy_Lean_beef	205	205	-0.201195	0.55624	0.0641175	0.0482997	0.185875	0.854193	Dairy_Lean_beef	126	126	-0.146976	0.56817	0.00913751	0.0595427	0.878292	0.947445	Dairy_Lean_beef	223	223	0.0254258	0.537627	0.0274568	0.0479294	0.567333	0.850788	Dairy_Lean_beef	871	871	0.0612162	0.608226	0.0243489	0.0178287	0.172383	0.384547	Dairy_Lean_beef	428.658	282.061	435.308	3146.03	0.015264	0.0276362	1.81055	0.07021	0.226232	NS	NS	NS
S1_Acetate/butyrate producers	Spreads_sweet	205	205	-0.0555374	0.536875	-0.133017	0.0715641	0.0645441	0.400541	Spreads_sweet	126	126	0.0129582	0.465282	-0.0747327	0.0607513	0.221112	0.978735	Spreads_sweet	223	223	-0.0241369	0.470388	-0.011677	0.0395315	0.767984	0.890861	Spreads_sweet	871	871	0.0180257	0.519839	-0.0215199	0.0154472	0.163941	0.432209	Spreads_sweet	195.258	270.95	639.903	4190.85	0.01374	-0.0271628	-1.97692	0.0480511	0.232109	NS	NS	NS
S19_Streptococci, L. sakei	Spreads_sweet	205	205	-0.0555374	0.536875	0.0147602	0.0484102	0.760784	0.94012	Spreads_sweet	126	126	0.0129582	0.465282	-0.0901529	0.108919	0.409583	0.978735	Spreads_sweet	223	223	-0.0241369	0.470388	-0.12377	0.0769862	0.109404	0.396589	Spreads_sweet	871	871	0.0180257	0.519839	-0.0495801	0.0283738	0.0809381	0.293401	Spreads_sweet	426.704	84.2927	168.723	1242.12	0.0228108	-0.0435876	-1.91083	0.0560264	0.232109	NS	NS	NS
S2_Bifidobacterium animalis	Spreads_sweet	205	205	-0.0555374	0.536875	0.103375	0.0719815	0.152533	0.491495	Spreads_sweet	126	126	0.0129582	0.465282	0.190308	0.248233	0.444794	0.978735	Spreads_sweet	223	223	-0.0241369	0.470388	0.365852	0.202575	0.0723025	0.396589	Spreads_sweet	871	871	0.0180257	0.519839	0.0485933	0.0650487	0.455249	0.574009	Spreads_sweet	193	16.2286	24.3686	236.332	0.04613	0.092438	2.00386	0.0450852	0.232109	NS	NS	NS
S12_Bacteroides finegoldii	Sweetened_tea_yoghurtdrink	205	205	0.111425	1.12755	-0.0193189	0.0914978	0.832994	0.927838	Sweetened_tea_yoghurtdrink	126	126	0.0674218	0.540567	-0.258984	0.208815	0.2173	0.700188	Sweetened_tea_yoghurtdrink	223	223	0.00250442	0.480442	-0.0194493	0.134149	0.884859	0.916461	Sweetened_tea_yoghurtdrink	871	871	-0.0373747	0.434722	-0.15113	0.0688943	0.0285264	0.561344	Sweetened_tea_yoghurtdrink	119.448	22.9339	55.5678	210.685	0.0494689	-0.100747	-2.03657	0.0416935	0.241823	NS	NS	NS
S25_Lachnospiraceae bacterium 3 1 57FAA	Dairy_Cereals	205	205	-0.161259	0.558239	0.154069	0.144645	0.288098	0.659005	Dairy_Cereals	126	126	-0.0521211	0.621192	0.0781776	0.103276	0.450546	0.958129	Dairy_Cereals	223	223	-0.0111794	0.671357	0.196352	0.0698432	0.00538537	0.156176	Dairy_Cereals	871	871	0.0462207	0.622802	-0.017091	0.0612866	0.780411	0.838219	Dairy_Cereals	47.796	93.757	204.999	266.238	0.0403965	0.0822393	2.0358	0.0417703	0.242268	NS	NS	NS
S8_Eggerthella lenta, Gordonibacter pamelaeae	Fish_Nuts	205	205	-0.135461	0.55016	0.00743787	0.112747	0.947469	0.965799	Fish_Nuts	126	126	0.0141888	0.575752	-0.173673	0.110154	0.117603	0.810424	Fish_Nuts	223	223	0.0520077	0.656703	-0.075161	0.0583911	0.199415	0.509322	Fish_Nuts	871	871	0.0168252	0.570004	-0.0376032	0.0343753	0.274309	0.813063	Fish_Nuts	78.6662	82.4133	293.296	846.265	0.0277282	-0.0519702	-1.87427	0.0608927	0.25227	NS	NS	NS
S20_Lactococcus lactis	Vegetables_Fruit_Tea	205	205	-0.11222	0.77642	-0.0130902	0.0610804	0.830524	0.860185	Vegetables_Fruit_Tea	126	126	-0.000156026	0.675955	0.00919452	0.136906	0.946567	0.950885	Vegetables_Fruit_Tea	223	223	0.0418139	0.681131	0.0187346	0.0496829	0.706504	0.958588	Vegetables_Fruit_Tea	871	871	0.0161285	0.690431	0.0391541	0.020539	0.0569627	0.235988	Vegetables_Fruit_Tea	268.038	53.3526	405.122	2370.52	0.0179691	0.0314454	1.74996	0.0801245	0.258179	NS	NS	NS
S19_Streptococci, L. sakei	Fish_Nuts	205	205	-0.135461	0.55016	-0.0201462	0.0451359	0.655867	0.864552	Fish_Nuts	126	126	0.0141888	0.575752	-0.166754	0.085196	0.0527786	0.76529	Fish_Nuts	223	223	0.0520077	0.656703	-0.0715332	0.0524657	0.174207	0.509322	Fish_Nuts	871	871	0.0168252	0.570004	-0.020848	0.026689	0.434937	0.953867	Fish_Nuts	490.859	137.772	363.286	1403.9	0.0204302	-0.0367802	-1.80028	0.0718161	0.260333	NS	NS	NS
S12_Bacteroides finegoldii	Sugar_Sweets	205	205	0.184389	1.11711	-0.0667028	0.100903	0.509341	0.93287	Sugar_Sweets	126	126	0.0308263	0.62208	0.0109028	0.180321	0.951887	0.951887	Sugar_Sweets	223	223	-0.0900997	0.489801	0.0245127	0.145213	0.866107	0.866107	Sugar_Sweets	871	871	-0.0242716	0.577625	-0.11302	0.0558987	0.0434968	0.420469	Sugar_Sweets	98.2172	30.7545	47.4227	320.034	0.0448819	-0.0830409	-1.85021	0.0642834	0.266317	NS	NS	NS
S16_Propionate/succinate producers	Icecream_Beer_non-alcoholic	205	205	-0.119788	0.542039	-0.0159075	0.0490284	0.745955	0.865307	Icecream_Beer_non-alcoholic	126	126	-0.0410161	0.57799	-0.158126	0.0958809	0.101724	0.808028	Icecream_Beer_non-alcoholic	223	223	-0.0245111	0.517043	-0.102557	0.0743951	0.16948	0.67146	Icecream_Beer_non-alcoholic	871	871	0.0407092	0.884625	-0.0370106	0.0267137	0.166274	0.746974	Icecream_Beer_non-alcoholic	416.011	108.777	180.681	1401.3	0.0217867	-0.0447183	-2.05255	0.0401163	0.27005	NS	NS	NS
S19_Streptococci, L. sakei	Icecream_Beer_non-alcoholic	205	205	-0.119788	0.542039	-0.100184	0.0465567	0.0326961	0.474093	Icecream_Beer_non-alcoholic	126	126	-0.0410161	0.57799	-0.0788503	0.0806672	0.330421	0.808028	Icecream_Beer_non-alcoholic	223	223	-0.0245111	0.517043	-0.103076	0.0659051	0.119321	0.67146	Icecream_Beer_non-alcoholic	871	871	0.0407092	0.884625	-0.0126892	0.016267	0.435577	0.883459	Icecream_Beer_non-alcoholic	461.355	153.676	230.23	3779.08	0.0147053	-0.028117	-1.91203	0.0558725	0.27005	NS	NS	NS
S23_B. hydrogenotrophica	Icecream_Beer_non-alcoholic	205	205	-0.119788	0.542039	0.328108	0.172198	0.0581686	0.512719	Icecream_Beer_non-alcoholic	126	126	-0.0410161	0.57799	-0.307396	0.240362	0.203404	0.808028	Icecream_Beer_non-alcoholic	223	223	-0.0245111	0.517043	0.0761236	0.128941	0.555553	0.855517	Icecream_Beer_non-alcoholic	871	871	0.0407092	0.884625	0.0683341	0.0292731	0.0198046	0.191445	Icecream_Beer_non-alcoholic	33.7243	17.3088	60.1476	1166.98	0.027971	0.0704666	2.51928	0.0117596	0.27005	NS	NS	NS
S24_Ruminococcus S24_Ruminococcus gnavus, Lachnospiraceae bacterium 1 1 57FAA, Lachnospiraceae bacterium	Icecream_Beer_non-alcoholic	205	205	-0.119788	0.542039	-0.0570267	0.150847	0.705805	0.865307	Icecream_Beer_non-alcoholic	126	126	-0.0410161	0.57799	-0.111862	0.106982	0.297913	0.808028	Icecream_Beer_non-alcoholic	223	223	-0.0245111	0.517043	-0.0097298	0.0380459	0.798408	0.995352	Icecream_Beer_non-alcoholic	871	871	0.0407092	0.884625	0.0283003	0.0112444	0.0120268	0.17688	Icecream_Beer_non-alcoholic	43.9468	87.3739	690.851	7909.14	0.0107019	0.0234592	2.19206	0.0283751	0.27005	NS	NS	NS
S7_Alistipes, Bacteroides	Icecream_Beer_non-alcoholic	205	205	-0.119788	0.542039	0.0459448	0.0610878	0.452873	0.789801	Icecream_Beer_non-alcoholic	126	126	-0.0410161	0.57799	0.0804348	0.0611318	0.190762	0.808028	Icecream_Beer_non-alcoholic	223	223	-0.0245111	0.517043	0.0628827	0.0499002	0.208962	0.67146	Icecream_Beer_non-alcoholic	871	871	0.0407092	0.884625	0.0196726	0.0146712	0.180304	0.746974	Icecream_Beer_non-alcoholic	267.973	267.588	401.601	4645.92	0.0133833	0.026954	2.014	0.0440091	0.27005	NS	NS	NS
S9_Bacteroides, Roseburia	Icecream_Beer_non-alcoholic	205	205	-0.119788	0.542039	-0.0155046	0.0477743	0.745873	0.865307	Icecream_Beer_non-alcoholic	126	126	-0.0410161	0.57799	-0.0118648	0.0575884	0.837119	0.887199	Icecream_Beer_non-alcoholic	223	223	-0.0245111	0.517043	-0.00180935	0.0469618	0.969302	0.995352	Icecream_Beer_non-alcoholic	871	871	0.0407092	0.884625	-0.0232016	0.0118787	0.0511179	0.370605	Icecream_Beer_non-alcoholic	438.139	301.53	453.43	7086.95	0.0109896	-0.02121	-1.93	0.0536074	0.27005	NS	NS	NS
S11_Bacteroides faecis	Meat	205	205	0.0153272	0.592254	-0.182503	0.128168	0.156031	0.814157	Meat	126	126	0.00509592	0.600788	-0.185214	0.202455	0.362112	0.809849	Meat	223	223	-0.0138947	0.560121	-0.0715394	0.129363	0.580825	0.802091	Meat	871	871	-0.0016754	0.624155	-0.0833769	0.0547683	0.128285	0.620045	Meat	60.8756	24.3973	59.7555	333.381	0.0457193	-0.099705	-2.18081	0.0291978	0.282245	NS	NS	NS
28_Haemophilus, Veillonella	Spreads_sweet	205	205	-0.0555374	0.536875	0.0200476	0.0542164	0.712019	0.94012	Spreads_sweet	126	126	0.0129582	0.465282	-0.0142508	0.0574619	0.80461	0.978735	Spreads_sweet	223	223	-0.0241369	0.470388	0.010015	0.0308573	0.745857	0.890861	Spreads_sweet	871	871	0.0180257	0.519839	0.0331863	0.0172448	0.0546478	0.264131	Spreads_sweet	340.203	302.858	1050.23	3362.65	0.0140637	0.0246474	1.75256	0.0796776	0.288831	NS	NS	NS
S20_Lactococcus lactis	Fish_Nuts	205	205	-0.135461	0.55016	0.00368226	0.0857709	0.965799	0.965799	Fish_Nuts	126	126	0.0141888	0.575752	-0.160542	0.151822	0.292437	0.810424	Fish_Nuts	223	223	0.0520077	0.656703	-0.015945	0.0495758	0.748064	0.806477	Fish_Nuts	871	871	0.0168252	0.570004	0.0556758	0.0243675	0.022582	0.43476	Fish_Nuts	135.932	43.3843	406.875	1684.13	0.0209873	0.0355955	1.69605	0.089876	0.2896	NS	NS	NS
S14_Odoribacter	Eggs_Alcoholic_drinks	205	205	-0.104303	0.43925	-0.134131	0.0973076	0.169757	0.703885	Eggs_Alcoholic_drinks	126	126	-0.134042	0.302491	-0.0447042	0.345825	0.897362	0.986032	Eggs_Alcoholic_drinks	223	223	-0.0546888	0.448173	-0.179883	0.106391	0.0923921	0.535874	Eggs_Alcoholic_drinks	871	871	0.0583724	0.606478	-0.0388619	0.048856	0.42658	0.777288	Eggs_Alcoholic_drinks	105.61	8.36158	88.3465	418.952	0.0401199	-0.075189	-1.87411	0.0609155	0.294425	NS	NS	NS
S17_Alistipes	Dairy_Lean_beef	205	205	-0.201195	0.55624	-0.181267	0.200835	0.367848	0.888966	Dairy_Lean_beef	126	126	-0.146976	0.56817	-0.121001	0.172548	0.484499	0.924779	Dairy_Lean_beef	223	223	0.0254258	0.537627	-0.0162758	0.117424	0.889889	0.924253	Dairy_Lean_beef	871	871	0.0612162	0.608226	0.114936	0.0493873	0.0201829	0.146326	Dairy_Lean_beef	24.7925	33.5878	72.5248	409.986	0.0429977	0.0691146	1.6074	0.107966	0.298233	NS	NS	NS
S3_Faecalibacterium_prausnitzii_Bifidobacterium_bifidum	Dairy_Lean_beef	205	205	-0.201195	0.55624	-0.0865414	0.0938389	0.357529	0.888966	Dairy_Lean_beef	126	126	-0.146976	0.56817	0.230367	0.16069	0.154307	0.900777	Dairy_Lean_beef	223	223	0.0254258	0.537627	0.0148468	0.0865342	0.863936	0.924253	Dairy_Lean_beef	871	871	0.0612162	0.608226	-0.074824	0.0386769	0.0533668	0.193455	Dairy_Lean_beef	113.562	38.7275	133.544	668.491	0.0323707	-0.0512853	-1.58431	0.113123	0.298233	NS	NS	NS
S12_Bacteroides finegoldii	Bread_Legumes	205	205	-0.0736819	0.691941	0.0670158	0.161422	0.678473	0.936939	Bread_Legumes	126	126	0.0277121	0.583927	-0.212283	0.203787	0.299649	0.579322	Bread_Legumes	223	223	-0.116311	0.444079	0.09199	0.158887	0.563212	0.860954	Bread_Legumes	871	871	0.0435099	0.579569	-0.13456	0.0580853	0.0207587	0.120401	Bread_Legumes	38.3773	24.0795	39.6119	296.393	0.0500964	-0.0973206	-1.94266	0.0520567	0.301929	NS	NS	NS
S26_Roseburia	Dairy_Cereals	205	205	-0.161259	0.558239	0.222164	0.132768	0.0958664	0.65448	Dairy_Cereals	126	126	-0.0521211	0.621192	0.0227748	0.11654	0.845399	0.969933	Dairy_Cereals	223	223	-0.0111794	0.671357	0.0501176	0.0447464	0.264098	0.919942	Dairy_Cereals	871	871	0.0462207	0.622802	0.0429701	0.0412446	0.297786	0.572654	Dairy_Cereals	56.73	73.6298	499.44	587.849	0.0286575	0.0530292	1.85044	0.0642495	0.310539	NS	NS	NS
S11_Bacteroides faecis	Spreads_sweet	205	205	-0.0555374	0.536875	-0.258461	0.143582	0.0733604	0.400541	Spreads_sweet	126	126	0.0129582	0.465282	0.0584195	0.267598	0.827558	0.978735	Spreads_sweet	223	223	-0.0241369	0.470388	-0.416746	0.1576	0.00878334	0.127358	Spreads_sweet	871	871	0.0180257	0.519839	0.000978588	0.0634036	0.987689	0.987689	Spreads_sweet	48.5065	13.9647	40.2611	248.755	0.053339	-0.0803912	-1.50717	0.131766	0.312746	NS	NS	NS
S24_Ruminococcus S24_Ruminococcus gnavus, Lachnospiraceae bacterium 1 1 57FAA, Lachnospiraceae bacterium	Spreads_sweet	205	205	-0.0555374	0.536875	0.138995	0.162105	0.392246	0.710945	Spreads_sweet	126	126	0.0129582	0.465282	0.0527168	0.130916	0.687926	0.978735	Spreads_sweet	223	223	-0.0241369	0.470388	-0.0897315	0.0451024	0.0479681	0.347769	Spreads_sweet	871	871	0.0180257	0.519839	-0.0183282	0.019694	0.352303	0.537725	Spreads_sweet	38.0545	58.3469	491.588	2578.29	0.0177716	-0.0262141	-1.47506	0.140196	0.312746	NS	NS	NS
S29_Sutterella wadsworthensis	Spreads_sweet	205	205	-0.0555374	0.536875	-0.0436235	0.124537	0.726515	0.94012	Spreads_sweet	126	126	0.0129582	0.465282	-0.0536543	0.133221	0.68793	0.978735	Spreads_sweet	223	223	-0.0241369	0.470388	0.0178808	0.0912824	0.844884	0.91731	Spreads_sweet	871	871	0.0180257	0.519839	0.0409072	0.0232418	0.0787708	0.293401	Spreads_sweet	64.4766	56.3453	120.012	1851.23	0.0218631	0.0344342	1.57499	0.115259	0.312746	NS	NS	NS
S4_Bifidobacterium_catenulatum	Spreads_sweet	205	205	-0.0555374	0.536875	0.0599552	0.157008	0.702972	0.94012	Spreads_sweet	126	126	0.0129582	0.465282	0.0751107	0.132745	0.572567	0.978735	Spreads_sweet	223	223	-0.0241369	0.470388	0.562541	0.141868	9.9566e-05	0.00288742	Spreads_sweet	871	871	0.0180257	0.519839	0.0131629	0.0373917	0.724909	0.80864	Spreads_sweet	40.5656	56.75	49.6858	715.238	0.0340554	0.0510989	1.50047	0.133494	0.312746	NS	NS	NS
S8_Eggerthella lenta, Gordonibacter pamelaeae	Spreads_sweet	205	205	-0.0555374	0.536875	0.010185	0.121392	0.93322	0.966549	Spreads_sweet	126	126	0.0129582	0.465282	-0.0257523	0.143177	0.857574	0.978735	Spreads_sweet	223	223	-0.0241369	0.470388	0.147927	0.0875558	0.0925773	0.396589	Spreads_sweet	871	871	0.0180257	0.519839	0.0436397	0.0379477	0.25047	0.53176	Spreads_sweet	67.8613	48.7812	130.446	694.43	0.0325901	0.0520819	1.59809	0.110023	0.312746	NS	NS	NS
S18_Lactobacillus delbrueckii	Fish_Nuts	205	205	-0.135461	0.55016	-0.202886	0.213722	0.343619	0.830217	Fish_Nuts	126	126	0.0141888	0.575752	-0.169367	0.178501	0.344613	0.832815	Fish_Nuts	223	223	0.0520077	0.656703	-0.11535	0.0849353	0.175845	0.509322	Fish_Nuts	871	871	0.0168252	0.570004	-0.0315022	0.0490083	0.520529	0.953867	Fish_Nuts	21.8929	31.3848	138.619	416.351	0.0405471	-0.0638933	-1.57578	0.115076	0.313055	NS	NS	NS
S6_Bifidobacterium_pseudocatenulatum	Fish_Nuts	205	205	-0.135461	0.55016	-0.208998	0.17241	0.226867	0.830217	Fish_Nuts	126	126	0.0141888	0.575752	0.0727911	0.201362	0.718366	0.922457	Fish_Nuts	223	223	0.0520077	0.656703	0.14518	0.0951847	0.128654	0.509322	Fish_Nuts	871	871	0.0168252	0.570004	0.0694452	0.0525367	0.18657	0.676318	Fish_Nuts	33.6415	24.6629	110.374	362.305	0.043397	0.067702	1.56006	0.118745	0.313055	NS	NS	NS
S16_Propionate/succinate producers	Dairy_Cereals	205	205	-0.161259	0.558239	-0.00195212	0.0513643	0.969724	0.986402	Dairy_Cereals	126	126	-0.0521211	0.621192	0.0237976	0.0904553	0.792935	0.958129	Dairy_Cereals	223	223	-0.0111794	0.671357	0.0122759	0.0615502	0.842104	0.919942	Dairy_Cereals	871	871	0.0462207	0.622802	0.0836616	0.0391004	0.0326633	0.315745	Dairy_Cereals	379.033	122.217	263.962	654.089	0.0265438	0.0423667	1.59611	0.110465	0.320349	NS	NS	NS
S23_B. hydrogenotrophica	Dairy_Cereals	205	205	-0.161259	0.558239	-0.116464	0.180115	0.51863	0.736425	Dairy_Cereals	126	126	-0.0521211	0.621192	0.241978	0.224739	0.283772	0.914376	Dairy_Cereals	223	223	-0.0111794	0.671357	-0.000692373	0.105007	0.994745	0.994745	Dairy_Cereals	871	871	0.0462207	0.622802	-0.0790947	0.0428514	0.065264	0.420601	Dairy_Cereals	30.8247	19.799	90.6913	544.591	0.0381828	-0.0611398	-1.60124	0.109324	0.320349	NS	NS	NS
S29_Sutterella wadsworthensis	Dairy_Cereals	205	205	-0.161259	0.558239	-0.11231	0.118913	0.346135	0.659005	Dairy_Cereals	126	126	-0.0521211	0.621192	-0.0326714	0.089044	0.714402	0.958129	Dairy_Cereals	223	223	-0.0111794	0.671357	-0.0446543	0.0630745	0.479729	0.919942	Dairy_Cereals	871	871	0.0462207	0.622802	-0.0267177	0.0194978	0.170972	0.495819	Dairy_Cereals	70.7194	126.122	251.357	2630.44	0.0180227	-0.0303922	-1.68633	0.0917329	0.320349	NS	NS	NS
S8_Eggerthella lenta, Gordonibacter pamelaeae	Dairy_Cereals	205	205	-0.161259	0.558239	0.268912	0.115859	0.0213088	0.369189	Dairy_Cereals	126	126	-0.0521211	0.621192	0.159861	0.102982	0.12331	0.715198	Dairy_Cereals	223	223	-0.0111794	0.671357	0.0418562	0.0605264	0.489978	0.919942	Dairy_Cereals	871	871	0.0462207	0.622802	0.017191	0.0315993	0.586563	0.739579	Dairy_Cereals	74.4969	94.2924	272.967	1001.48	0.0263227	0.0441705	1.67804	0.0933397	0.320349	NS	NS	NS
S1_Acetate/butyrate producers	Ready_meals	205	205	-0.0761095	0.668047	0.039148	0.0571381	0.494048	0.826175	Ready_meals	126	126	-0.0726462	0.963861	0.0223804	0.0298755	0.455286	0.982067	Ready_meals	223	223	0.0593805	0.744316	0.0347042	0.0233736	0.139065	0.993664	Ready_meals	871	871	0.0135936	0.640699	0.0141342	0.013002	0.277306	0.734791	Ready_meals	306.301	1120.39	1830.42	5915.36	0.0104414	0.0200816	1.92328	0.0544454	0.321157	NS	NS	NS
S18_Lactobacillus delbrueckii	Ready_meals	205	205	-0.0761095	0.668047	-0.281805	0.181112	0.121304	0.564307	Ready_meals	126	126	-0.0726462	0.963861	-0.108832	0.111566	0.331278	0.982067	Ready_meals	223	223	0.0593805	0.744316	-0.0439734	0.0757174	0.562007	0.993664	Ready_meals	871	871	0.0135936	0.640699	-0.0582763	0.045596	0.201557	0.730644	Ready_meals	30.4862	80.3414	174.425	481.001	0.0361255	-0.0692145	-1.91595	0.0553719	0.321157	NS	NS	NS
S24_Ruminococcus S24_Ruminococcus gnavus, Lachnospiraceae bacterium 1 1 57FAA, Lachnospiraceae bacterium	Ready_meals	205	205	-0.0761095	0.668047	0.125961	0.128169	0.326924	0.790066	Ready_meals	126	126	-0.0726462	0.963861	-0.0438625	0.0632685	0.489522	0.982067	Ready_meals	223	223	0.0593805	0.744316	0.010462	0.0268183	0.696862	0.993664	Ready_meals	871	871	0.0135936	0.640699	0.0353951	0.0163337	0.0305164	0.413063	Ready_meals	60.8745	249.818	1390.39	3748.26	0.0135465	0.0264117	1.9497	0.0512117	0.321157	NS	NS	NS
S19_Streptococci, L. sakei	Sugar_Sweets	205	205	0.184389	1.11711	-0.0586017	0.024786	0.0190943	0.110747	Sugar_Sweets	126	126	0.0308263	0.62208	-0.136616	0.0761948	0.0756502	0.65727	Sugar_Sweets	223	223	-0.0900997	0.489801	-0.0450568	0.0765772	0.556907	0.672929	Sugar_Sweets	871	871	-0.0242716	0.577625	0.0197652	0.0266952	0.459263	0.894731	Sugar_Sweets	1627.75	172.246	170.53	1403.25	0.0172164	-0.0293051	-1.70216	0.0887251	0.321628	NS	NS	NS
S17_Alistipes	Savoury_snacks	205	205	-0.0114351	0.501597	-0.192435	0.221547	0.386114	0.976642	Savoury_snacks	126	126	0.0331572	0.582506	0.139848	0.173009	0.4205	0.816348	Savoury_snacks	223	223	-0.010086	0.411775	0.431409	0.144649	0.00318633	0.0462018	Savoury_snacks	871	871	0.000932337	0.495994	0.0737766	0.0626888	0.239571	0.688187	Savoury_snacks	20.3736	33.4091	47.7936	254.46	0.0529972	0.112751	2.12749	0.0333795	0.322669	NS	NS	NS
S6_Bifidobacterium_pseudocatenulatum	Fastfood	205	205	0.059247	0.613728	-0.584888	0.224569	0.00989541	0.286967	Fastfood	126	126	0.0181697	0.719587	0.46739	0.274294	0.0909743	0.879418	Fastfood	223	223	-0.0641103	0.381483	-0.407324	0.213183	0.0573638	0.339905	Fastfood	871	871	8.79047e-06	0.532809	-0.0865148	0.0816016	0.289345	0.566579	Fastfood	19.829	13.2913	22.0038	150.177	0.0697919	-0.133174	-1.90816	0.056371	0.326952	NS	NS	NS
S17_Alistipes	Bread_Legumes	205	205	-0.0736819	0.691941	-0.204313	0.179415	0.256167	0.675348	Bread_Legumes	126	126	0.0277121	0.583927	-0.18781	0.178863	0.29582	0.579322	Bread_Legumes	223	223	-0.116311	0.444079	-0.203926	0.14616	0.164376	0.813769	Bread_Legumes	871	871	0.0435099	0.579569	-0.0418864	0.0566933	0.460213	0.889746	Bread_Legumes	31.0659	31.2578	46.8102	311.126	0.0487799	-0.082795	-1.69732	0.0896364	0.331648	NS	NS	NS
S18_Lactobacillus delbrueckii	Bread_Legumes	205	205	-0.0736819	0.691941	-0.0427318	0.194123	0.825997	0.976539	Bread_Legumes	126	126	0.0277121	0.583927	-0.447852	0.184824	0.0168813	0.244779	Bread_Legumes	223	223	-0.116311	0.444079	-0.0675931	0.138365	0.62568	0.860954	Bread_Legumes	871	871	0.0435099	0.579569	-0.0525216	0.0536865	0.328199	0.865252	Bread_Legumes	26.5367	29.274	52.2334	346.952	0.0468809	-0.079116	-1.68759	0.091489	0.331648	NS	NS	NS
S4_Bifidobacterium_catenulatum	Bread_Legumes	205	205	-0.0736819	0.691941	-0.179401	0.132018	0.175714	0.65795	Bread_Legumes	126	126	0.0277121	0.583927	-0.09837	0.10934	0.370096	0.633402	Bread_Legumes	223	223	-0.116311	0.444079	-0.0286651	0.159467	0.857512	0.935336	Bread_Legumes	871	871	0.0435099	0.579569	0.0986511	0.0365139	0.00704087	0.0680618	Bread_Legumes	57.3761	83.6457	39.3243	750.039	0.0327845	0.0584096	1.78162	0.0748108	0.331648	NS	NS	NS
S8_Eggerthella lenta, Gordonibacter pamelaeae	Sugar_Sweets	205	205	0.184389	1.11711	0.155744	0.0629134	0.0141481	0.102573	Sugar_Sweets	126	126	0.0308263	0.62208	0.0146591	0.106183	0.890436	0.951887	Sugar_Sweets	223	223	-0.0900997	0.489801	0.197854	0.0856901	0.0219005	0.111693	Sugar_Sweets	871	871	-0.0242716	0.577625	-0.0151332	0.036431	0.67796	0.905322	Sugar_Sweets	252.646	88.6925	136.188	753.455	0.0285019	0.0456477	1.60157	0.109252	0.352033	NS	NS	NS
S10_Bacteroides eggerthii	Dairy_Lean_beef	205	205	-0.201195	0.55624	-0.00881779	0.161518	0.956517	0.98249	Dairy_Lean_beef	126	126	-0.146976	0.56817	0.113418	0.235705	0.63126	0.947445	Dairy_Lean_beef	223	223	0.0254258	0.537627	0.161027	0.102122	0.116297	0.33726	Dairy_Lean_beef	871	871	0.0612162	0.608226	0.0427262	0.0525312	0.416242	0.66092	Dairy_Lean_beef	38.3319	17.9996	95.8876	362.381	0.0440824	0.0634028	1.43828	0.150355	0.363357	NS	NS	NS
S1_Acetate/butyrate producers	Savoury_snacks	205	205	-0.0114351	0.501597	0.0442174	0.0750991	0.556672	0.976642	Savoury_snacks	126	126	0.0331572	0.582506	-0.064961	0.0486104	0.184025	0.751069	Savoury_snacks	223	223	-0.010086	0.411775	0.148332	0.0419508	0.000497286	0.0144213	Savoury_snacks	871	871	0.000932337	0.495994	0.0190426	0.0168291	0.25815	0.688187	Savoury_snacks	177.309	423.196	568.223	3530.84	0.0145872	0.0280602	1.92362	0.0544022	0.364603	NS	NS	NS
S10_Bacteroides eggerthii	Savoury_snacks	205	205	-0.0114351	0.501597	-0.189858	0.17764	0.286463	0.976642	Savoury_snacks	126	126	0.0331572	0.582506	0.122625	0.236456	0.604997	0.848454	Savoury_snacks	223	223	-0.010086	0.411775	-0.162552	0.128606	0.207604	0.613312	Savoury_snacks	871	871	0.000932337	0.495994	-0.0903115	0.0664794	0.174663	0.688187	Savoury_snacks	31.6896	17.8854	60.4609	226.27	0.0545297	-0.101355	-1.85871	0.0630687	0.364603	NS	NS	NS
S18_Lactobacillus delbrueckii	Savoury_snacks	205	205	-0.0114351	0.501597	0.60347	0.235561	0.0111517	0.323398	Savoury_snacks	126	126	0.0331572	0.582506	0.529405	0.17625	0.00324693	0.0941609	Savoury_snacks	223	223	-0.010086	0.411775	0.173095	0.138669	0.213284	0.613312	Savoury_snacks	871	871	0.000932337	0.495994	-0.00712771	0.0594252	0.904555	0.972927	Savoury_snacks	18.0216	32.1914	52.0042	283.178	0.0509386	0.0905592	1.77781	0.0754351	0.364603	NS	NS	NS
S20_Lactococcus lactis	Coffee_milk_Soup	205	205	-0.0190486	0.599621	0.206632	0.0830202	0.0136329	0.197676	Coffee_milk_Soup	126	126	0.00261508	0.755444	0.0498228	0.117073	0.671184	0.953261	Coffee_milk_Soup	223	223	-0.00397076	0.684592	-0.0331144	0.04767	0.48806	0.806798	Coffee_milk_Soup	871	871	0.00528062	0.524601	0.0467208	0.0266752	0.0802459	0.657113	Coffee_milk_Soup	145.088	72.9599	440.058	1405.35	0.0220142	0.0410485	1.86464	0.0622319	0.364953	NS	NS	NS
S25_Lachnospiraceae bacterium 3 1 57FAA	Coffee_milk_Soup	205	205	-0.0190486	0.599621	0.2438	0.136516	0.0756422	0.627574	Coffee_milk_Soup	126	126	0.00261508	0.755444	0.069051	0.0864287	0.425906	0.953261	Coffee_milk_Soup	223	223	-0.00397076	0.684592	0.0661667	0.0659874	0.317114	0.806798	Coffee_milk_Soup	871	871	0.00528062	0.524601	0.0587258	0.0711454	0.409353	0.855928	Coffee_milk_Soup	53.6581	133.87	229.656	197.564	0.0403322	0.0799082	1.98125	0.047563	0.364953	NS	NS	NS
S6_Bifidobacterium_pseudocatenulatum	Coffee_milk_Soup	205	205	-0.0190486	0.599621	0.284407	0.168883	0.0937399	0.627574	Coffee_milk_Soup	126	126	0.00261508	0.755444	-0.00768812	0.154756	0.960461	0.960461	Coffee_milk_Soup	223	223	-0.00397076	0.684592	0.07091	0.0919392	0.441386	0.806798	Coffee_milk_Soup	871	871	0.00528062	0.524601	0.0902479	0.056933	0.113295	0.657113	Coffee_milk_Soup	35.0613	41.7547	118.304	308.512	0.0445598	0.0911026	2.0445	0.0409041	0.364953	NS	NS	NS
S9_Bacteroides, Roseburia	Coffee_milk_Soup	205	205	-0.0190486	0.599621	-0.0269851	0.0470166	0.566654	0.864893	Coffee_milk_Soup	126	126	0.00261508	0.755444	0.00390136	0.0449921	0.931045	0.960461	Coffee_milk_Soup	223	223	-0.00397076	0.684592	-0.0183579	0.0355246	0.605846	0.856802	Coffee_milk_Soup	871	871	0.00528062	0.524601	-0.0389148	0.0201703	0.0540194	0.657113	Coffee_milk_Soup	452.375	494.001	792.394	2457.96	0.0154363	-0.0287075	-1.85974	0.062923	0.364953	NS	NS	NS
S1_Acetate/butyrate producers	Dairy_Lean_beef	205	205	-0.201195	0.55624	0.0943518	0.0678187	0.165707	0.854193	Dairy_Lean_beef	126	126	-0.146976	0.56817	0.0477781	0.04891	0.330656	0.924779	Dairy_Lean_beef	223	223	0.0254258	0.537627	0.0580622	0.0341636	0.0906583	0.33726	Dairy_Lean_beef	871	871	0.0612162	0.608226	0.00480701	0.0133186	0.718245	0.856431	Dairy_Lean_beef	217.421	418.027	856.787	5637.44	0.0118431	0.016457	1.38958	0.164656	0.367309	NS	NS	NS
S1_Acetate/butyrate producers	Vegetables_Fruit_Tea	205	205	-0.11222	0.77642	0.0121187	0.0478888	0.800484	0.860185	Vegetables_Fruit_Tea	126	126	-0.000156026	0.675955	-0.0211623	0.0445893	0.635953	0.885561	Vegetables_Fruit_Tea	223	223	0.0418139	0.681131	-0.00997407	0.0260122	0.701772	0.958588	Vegetables_Fruit_Tea	871	871	0.0161285	0.690431	-0.0153088	0.0113255	0.176825	0.471364	Vegetables_Fruit_Tea	436.046	502.966	1477.9	7796.19	0.00989513	-0.0136541	-1.37988	0.167623	0.36738	NS	NS	NS
S12_Bacteroides finegoldii	Vegetables_Fruit_Tea	205	205	-0.11222	0.77642	0.181015	0.126249	0.153202	0.555356	Vegetables_Fruit_Tea	126	126	-0.000156026	0.675955	0.303202	0.171701	0.0799618	0.386482	Vegetables_Fruit_Tea	223	223	0.0418139	0.681131	-0.00372145	0.0963035	0.969211	0.999251	Vegetables_Fruit_Tea	871	871	0.0161285	0.690431	0.0289106	0.0434832	0.506313	0.756174	Vegetables_Fruit_Tea	62.7395	33.9197	107.824	528.879	0.0369267	0.049812	1.34894	0.177356	0.36738	NS	NS	NS
S22_Mucin degraders	Vegetables_Fruit_Tea	205	205	-0.11222	0.77642	-0.0202953	0.0377878	0.591815	0.82677	Vegetables_Fruit_Tea	126	126	-0.000156026	0.675955	0.0239272	0.068912	0.729044	0.885561	Vegetables_Fruit_Tea	223	223	0.0418139	0.681131	-0.0286155	0.0540161	0.596833	0.958588	Vegetables_Fruit_Tea	871	871	0.0161285	0.690431	-0.0321454	0.0239455	0.179807	0.471364	Vegetables_Fruit_Tea	700.32	210.577	342.731	1744.03	0.0182646	-0.0250344	-1.37066	0.170482	0.36738	NS	NS	NS
S26_Roseburia	Vegetables_Fruit_Tea	205	205	-0.11222	0.77642	0.0448285	0.0921572	0.627205	0.82677	Vegetables_Fruit_Tea	126	126	-0.000156026	0.675955	-0.285751	0.121295	0.020144	0.33342	Vegetables_Fruit_Tea	223	223	0.0418139	0.681131	-0.0459243	0.0442371	0.300511	0.813179	Vegetables_Fruit_Tea	871	871	0.0161285	0.690431	-0.020963	0.0361572	0.562223	0.756174	Vegetables_Fruit_Tea	117.745	67.97	511.006	764.909	0.0261566	-0.0367033	-1.40321	0.160554	0.36738	NS	NS	NS
S7_Alistipes, Bacteroides	Vegetables_Fruit_Tea	205	205	-0.11222	0.77642	0.0220757	0.0436064	0.613243	0.82677	Vegetables_Fruit_Tea	126	126	-0.000156026	0.675955	-0.0700236	0.0558384	0.212265	0.559607	Vegetables_Fruit_Tea	223	223	0.0418139	0.681131	0.0225977	0.0387028	0.559909	0.955139	Vegetables_Fruit_Tea	871	871	0.0161285	0.690431	0.0318072	0.0187836	0.0907492	0.328966	Vegetables_Fruit_Tea	525.895	320.726	667.599	2834.28	0.0151646	0.0217058	1.43135	0.15233	0.36738	NS	NS	NS
S5_Streptococcus, Bifidobacterium dentium	Icecream_Beer_non-alcoholic	205	205	-0.119788	0.542039	-0.0274588	0.0560691	0.624901	0.862958	Icecream_Beer_non-alcoholic	126	126	-0.0410161	0.57799	-0.0241505	0.0620835	0.698035	0.886009	Icecream_Beer_non-alcoholic	223	223	-0.0245111	0.517043	-0.036726	0.0228949	0.110351	0.67146	Icecream_Beer_non-alcoholic	871	871	0.0407092	0.884625	0.0201394	0.00801735	0.0121986	0.17688	Icecream_Beer_non-alcoholic	318.092	259.446	1907.75	15557.4	0.00744473	0.0126507	1.69928	0.0892657	0.369815	NS	NS	NS
S10_Bacteroides eggerthii	Dairy_Cereals	205	205	-0.161259	0.558239	0.340896	0.163368	0.0381919	0.369189	Dairy_Cereals	126	126	-0.0521211	0.621192	-0.00982751	0.212953	0.963268	0.986382	Dairy_Cereals	223	223	-0.0111794	0.671357	0.0649366	0.0817063	0.427623	0.919942	Dairy_Cereals	871	871	0.0462207	0.622802	0.0294665	0.051242	0.56541	0.739579	Dairy_Cereals	37.4683	22.0511	149.792	380.845	0.0411639	0.0567735	1.37921	0.167831	0.374393	NS	NS	NS
S2_Bifidobacterium animalis	Dairy_Cereals	205	205	-0.161259	0.558239	0.00119183	0.069843	0.986402	0.986402	Dairy_Cereals	126	126	-0.0521211	0.621192	0.0293451	0.178363	0.869595	0.969933	Dairy_Cereals	223	223	-0.0111794	0.671357	0.0688133	0.141096	0.626252	0.919942	Dairy_Cereals	871	871	0.0462207	0.622802	0.09161	0.0544279	0.0927082	0.420601	Dairy_Cereals	205	31.4332	50.2305	337.564	0.0400247	0.0569463	1.42278	0.1548	0.374393	NS	NS	NS
S3_Faecalibacterium_prausnitzii_Bifidobacterium_bifidum	Dairy_Cereals	205	205	-0.161259	0.558239	-0.138332	0.0956313	0.149615	0.65448	Dairy_Cereals	126	126	-0.0521211	0.621192	0.0513131	0.146165	0.726162	0.958129	Dairy_Cereals	223	223	-0.0111794	0.671357	0.0398003	0.0685453	0.56209	0.919942	Dairy_Cereals	871	871	0.0462207	0.622802	-0.0590006	0.0377493	0.118428	0.429302	Dairy_Cereals	109.345	46.807	212.836	701.751	0.0305603	-0.0426406	-1.39529	0.162928	0.374393	NS	NS	NS
S11_Bacteroides faecis	Meat_Potatoes_Gravy	205	205	0.0092388	0.66643	-0.0142445	0.129709	0.912664	0.945259	Meat_Potatoes_Gravy	126	126	0.0317397	0.612627	0.0814677	0.232274	0.726398	0.780206	Meat_Potatoes_Gravy	223	223	-0.12186	0.546907	-0.0465824	0.152137	0.759756	0.84742	Meat_Potatoes_Gravy	871	871	0.0247565	0.537179	-0.160162	0.0683719	0.0193806	0.35878	Meat_Potatoes_Gravy	59.4372	18.5353	43.2047	213.916	0.0546282	-0.10627	-1.94533	0.0517349	0.375078	NS	NS	NS
S20_Lactococcus lactis	Meat_Potatoes_Gravy	205	205	0.0092388	0.66643	-0.070207	0.0823505	0.39494	0.838075	Meat_Potatoes_Gravy	126	126	0.0317397	0.612627	0.00667001	0.169521	0.96868	0.96868	Meat_Potatoes_Gravy	223	223	-0.12186	0.546907	-0.111851	0.0696502	0.109843	0.495345	Meat_Potatoes_Gravy	871	871	0.0247565	0.537179	-0.0407747	0.0297677	0.171142	0.905245	Meat_Potatoes_Gravy	147.458	34.7978	206.137	1128.52	0.0256755	-0.0522061	-2.0333	0.0420219	0.375078	NS	NS	NS
S26_Roseburia	Meat_Potatoes_Gravy	205	205	0.0092388	0.66643	0.342192	0.128702	0.00849377	0.168605	Meat_Potatoes_Gravy	126	126	0.0317397	0.612627	-0.112339	0.140736	0.426356	0.537579	Meat_Potatoes_Gravy	223	223	-0.12186	0.546907	0.0937662	0.062082	0.132595	0.495345	Meat_Potatoes_Gravy	871	871	0.0247565	0.537179	0.0398626	0.053204	0.453921	0.909477	Meat_Potatoes_Gravy	60.3709	50.4884	259.459	353.274	0.0371752	0.073795	1.98506	0.0471376	0.375078	NS	NS	NS
S14_Odoribacter	Meat_Potatoes_Gravy	205	205	0.0092388	0.66643	0.0509873	0.0739318	0.491285	0.838075	Meat_Potatoes_Gravy	126	126	0.0317397	0.612627	0.121935	0.189772	0.521753	0.6077	Meat_Potatoes_Gravy	223	223	-0.12186	0.546907	0.338247	0.101404	0.00100944	0.0160511	Meat_Potatoes_Gravy	871	871	0.0247565	0.537179	-0.00134411	0.0585432	0.981688	0.981688	Meat_Potatoes_Gravy	182.952	27.7675	97.2493	291.775	0.0408336	0.0753925	1.84634	0.0648433	0.376091	NS	NS	NS
S15_Parabacteroides johnsonii	Fastfood	205	205	0.059247	0.613728	0.138638	0.257217	0.590494	0.744536	Fastfood	126	126	0.0181697	0.719587	-0.248235	0.249476	0.321726	0.988999	Fastfood	223	223	-0.0641103	0.381483	0.138177	0.17256	0.424155	0.615024	Fastfood	871	871	8.79047e-06	0.532809	0.155648	0.0825962	0.0598404	0.330433	Fastfood	15.1147	16.0673	33.583	146.582	0.0687864	0.120951	1.75835	0.0786876	0.376103	NS	NS	NS
S23_B. hydrogenotrophica	Fastfood	205	205	0.059247	0.613728	0.226782	0.22909	0.323412	0.744536	Fastfood	126	126	0.0181697	0.719587	-0.255577	0.338275	0.45141	0.996213	Fastfood	223	223	-0.0641103	0.381483	0.356801	0.22678	0.117098	0.453635	Fastfood	871	871	8.79047e-06	0.532809	0.0884485	0.0713432	0.215401	0.566579	Fastfood	19.0541	8.73899	19.4441	196.469	0.064057	0.108338	1.69128	0.0907835	0.376103	NS	NS	NS
S13_Escherichia coli, Bacteroides fragilis	Spreads_sweet	205	205	-0.0555374	0.536875	0.000624054	0.0949791	0.994764	0.994764	Spreads_sweet	126	126	0.0129582	0.465282	0.00260873	0.0976621	0.978735	0.978735	Spreads_sweet	223	223	-0.0241369	0.470388	-0.00384968	0.0483486	0.936613	0.957087	Spreads_sweet	871	871	0.0180257	0.519839	0.0336252	0.0221665	0.129652	0.379988	Spreads_sweet	110.852	104.845	427.792	2035.2	0.0193214	0.0250607	1.29704	0.194616	0.381582	NS	NS	NS
S15_Parabacteroides johnsonii	Spreads_sweet	205	205	-0.0555374	0.536875	-0.154881	0.209069	0.459681	0.740598	Spreads_sweet	126	126	0.0129582	0.465282	0.135112	0.232399	0.562076	0.978735	Spreads_sweet	223	223	-0.0241369	0.470388	-0.0422633	0.114991	0.713579	0.890861	Spreads_sweet	871	871	0.0180257	0.519839	-0.0759786	0.0593425	0.200769	0.485191	Spreads_sweet	22.8782	18.5153	75.6258	283.968	0.0499384	-0.0643747	-1.28908	0.19737	0.381582	NS	NS	NS
S4_Bifidobacterium_catenulatum	Fastfood	205	205	0.059247	0.613728	0.165241	0.192757	0.392338	0.744536	Fastfood	126	126	0.0181697	0.719587	-0.00763543	0.143073	0.957528	0.996213	Fastfood	223	223	-0.0641103	0.381483	-0.422622	0.218854	0.0547775	0.339905	Fastfood	871	871	8.79047e-06	0.532809	-0.082163	0.0531712	0.122673	0.44469	Fastfood	26.9142	48.8522	20.8781	353.709	0.0471219	-0.0750766	-1.59324	0.111106	0.40276	NS	NS	NS
S1_Acetate/butyrate producers	Sugar_Sweets	205	205	0.184389	1.11711	-0.035135	0.0380449	0.356858	0.93287	Sugar_Sweets	126	126	0.0308263	0.62208	0.0240548	0.0445212	0.590018	0.855526	Sugar_Sweets	223	223	-0.0900997	0.489801	-0.105887	0.0385231	0.00649032	0.0941096	Sugar_Sweets	871	871	-0.0242716	0.577625	-0.00774043	0.0145976	0.596073	0.905322	Sugar_Sweets	690.888	504.505	673.84	4692.86	0.0123447	-0.0182585	-1.47906	0.139123	0.403457	NS	NS	NS
S2_Bifidobacterium animalis	Vegetables_Fruit_Tea	205	205	-0.11222	0.77642	0.0197561	0.0479894	0.68102	0.840667	Vegetables_Fruit_Tea	126	126	-0.000156026	0.675955	0.0621368	0.1744	0.72225	0.885561	Vegetables_Fruit_Tea	223	223	0.0418139	0.681131	0.0195212	0.134169	0.884454	0.958588	Vegetables_Fruit_Tea	871	871	0.0161285	0.690431	0.0618838	0.0477206	0.195047	0.471364	Vegetables_Fruit_Tea	434.219	32.878	55.5514	439.125	0.0322451	0.0404259	1.25371	0.209948	0.405899	NS	NS	NS
S7_Alistipes, Bacteroides	Sugar_Sweets	205	205	0.184389	1.11711	0.00520821	0.0347318	0.880952	0.9826	Sugar_Sweets	126	126	0.0308263	0.62208	0.095798	0.0576131	0.0989656	0.65727	Sugar_Sweets	223	223	-0.0900997	0.489801	0.224022	0.0563938	9.67974e-05	0.00280712	Sugar_Sweets	871	871	-0.0242716	0.577625	-0.0146516	0.0242325	0.545587	0.905322	Sugar_Sweets	828.984	301.271	314.44	1702.96	0.0178241	0.024993	1.4022	0.160854	0.424071	NS	NS	NS
S19_Streptococci, L. sakei	Savoury_snacks	205	205	-0.0114351	0.501597	0.00147931	0.0504567	0.976642	0.976642	Savoury_snacks	126	126	0.0331572	0.582506	-0.0389874	0.0955979	0.684172	0.848454	Savoury_snacks	223	223	-0.010086	0.411775	0.224614	0.0824397	0.0069809	0.067482	Savoury_snacks	871	871	0.000932337	0.495994	0.0321537	0.032005	0.31536	0.688187	Savoury_snacks	392.792	109.422	147.139	976.255	0.0248023	0.0373735	1.50685	0.131848	0.430088	NS	NS	NS
S22_Mucin degraders	Savoury_snacks	205	205	-0.0114351	0.501597	-0.0213932	0.0595175	0.719648	0.976642	Savoury_snacks	126	126	0.0331572	0.582506	-0.0282574	0.078061	0.718	0.848454	Savoury_snacks	223	223	-0.010086	0.411775	-0.0979976	0.0908652	0.282039	0.613312	Savoury_snacks	871	871	0.000932337	0.495994	-0.0413291	0.0354812	0.244417	0.688187	Savoury_snacks	282.3	164.109	121.117	794.333	0.0270978	-0.0406612	-1.50054	0.133476	0.430088	NS	NS	NS
S4_Bifidobacterium_catenulatum	Savoury_snacks	205	205	-0.0114351	0.501597	-0.0589375	0.1635	0.718875	0.976642	Savoury_snacks	126	126	0.0331572	0.582506	0.186473	0.104543	0.0770019	0.53862	Savoury_snacks	223	223	-0.010086	0.411775	-0.164603	0.159924	0.304506	0.613312	Savoury_snacks	871	871	0.000932337	0.495994	-0.085351	0.0406728	0.0361699	0.349642	Savoury_snacks	37.4079	91.4973	39.0995	604.493	0.0359792	-0.0558875	-1.55333	0.120345	0.430088	NS	NS	NS
S10_Bacteroides eggerthii	Wine_Alcohol	205	205	-0.27214	0.559289	-0.192774	0.157032	0.221044	0.712254	Wine_Alcohol	126	126	-0.21131	0.583969	-0.26512	0.223666	0.238226	0.863568	Wine_Alcohol	223	223	-0.0117566	0.664384	-0.00717016	0.0772441	0.926128	0.947548	Wine_Alcohol	871	871	0.0981863	0.783786	-0.0425744	0.0391418	0.277031	0.669493	Wine_Alcohol	40.5528	19.9894	167.598	652.708	0.0336937	-0.0478033	-1.41876	0.155969	0.45231	NS	NS	NS
S12_Bacteroides finegoldii	Wine_Alcohol	205	205	-0.27214	0.559289	-0.0538814	0.176162	0.760029	0.875346	Wine_Alcohol	126	126	-0.21131	0.583969	-0.170105	0.187186	0.365304	0.87106	Wine_Alcohol	223	223	-0.0117566	0.664384	0.0351195	0.095626	0.713784	0.934278	Wine_Alcohol	871	871	0.0981863	0.783786	0.066296	0.0378702	0.0803671	0.388441	Wine_Alcohol	32.2238	28.5401	109.357	697.276	0.033954	0.0501226	1.47619	0.139893	0.45231	NS	NS	NS
S23_B. hydrogenotrophica	Wine_Alcohol	205	205	-0.27214	0.559289	-0.0448641	0.172065	0.794563	0.875346	Wine_Alcohol	126	126	-0.21131	0.583969	0.33574	0.236587	0.158463	0.656491	Wine_Alcohol	223	223	-0.0117566	0.664384	0.279983	0.0972907	0.00440471	0.0638683	Wine_Alcohol	871	871	0.0981863	0.783786	0.0256315	0.0328015	0.434773	0.712905	Wine_Alcohol	33.7766	17.8656	105.647	929.422	0.0303349	0.0532659	1.75593	0.0791007	0.45231	NS	NS	NS
S24_Ruminococcus S24_Ruminococcus gnavus, Lachnospiraceae bacterium 1 1 57FAA, Lachnospiraceae bacterium	Wine_Alcohol	205	205	-0.27214	0.559289	-0.0899725	0.14944	0.547824	0.860679	Wine_Alcohol	126	126	-0.21131	0.583969	-0.0404063	0.101375	0.690933	0.892704	Wine_Alcohol	223	223	-0.0117566	0.664384	0.0267736	0.0294479	0.364314	0.880426	Wine_Alcohol	871	871	0.0981863	0.783786	-0.0238754	0.0125686	0.0578268	0.388441	Wine_Alcohol	44.7782	97.3059	1153.17	6330.35	0.0114515	-0.0168152	-1.46838	0.142	0.45231	NS	NS	NS
S26_Roseburia	Wine_Alcohol	205	205	-0.27214	0.559289	0.0675087	0.126684	0.594717	0.860679	Wine_Alcohol	126	126	-0.21131	0.583969	-0.03392	0.123388	0.783873	0.892704	Wine_Alcohol	223	223	-0.0117566	0.664384	0.019387	0.0427819	0.650946	0.934278	Wine_Alcohol	871	871	0.0981863	0.783786	-0.0866264	0.0313265	0.0058118	0.084271	Wine_Alcohol	62.3095	65.6836	546.362	1019	0.0243011	-0.0447051	-1.83964	0.0658218	0.45231	NS	NS	NS
S27_Turicibacter_sanguinis	Wine_Alcohol	205	205	-0.27214	0.559289	0.00865983	0.0527902	0.869864	0.900931	Wine_Alcohol	126	126	-0.21131	0.583969	0.233866	0.146437	0.112887	0.656491	Wine_Alcohol	223	223	-0.0117566	0.664384	-0.0304697	0.0207211	0.143152	0.6919	Wine_Alcohol	871	871	0.0981863	0.783786	-0.0264933	0.0271466	0.329385	0.674363	Wine_Alcohol	358.833	46.6335	2329.03	1356.97	0.0156336	-0.0227063	-1.4524	0.14639	0.45231	NS	NS	NS
S5_Streptococcus, Bifidobacterium dentium	Wine_Alcohol	205	205	-0.27214	0.559289	-0.0414515	0.0520223	0.426582	0.789874	Wine_Alcohol	126	126	-0.21131	0.583969	-0.0131543	0.0615394	0.831138	0.892704	Wine_Alcohol	223	223	-0.0117566	0.664384	0.0032404	0.0185702	0.861662	0.934278	Wine_Alcohol	871	871	0.0981863	0.783786	-0.016196	0.00905284	0.0739798	0.388441	Wine_Alcohol	369.505	264.054	2899.81	12202	0.0079719	-0.0131561	-1.65031	0.098879	0.45231	NS	NS	NS
S7_Alistipes, Bacteroides	Wine_Alcohol	205	205	-0.27214	0.559289	0.153092	0.0596076	0.0109518	0.235464	Wine_Alcohol	126	126	-0.21131	0.583969	0.0608119	0.060444	0.316398	0.87106	Wine_Alcohol	223	223	-0.0117566	0.664384	0.0713451	0.0381665	0.0629262	0.364972	Wine_Alcohol	871	871	0.0981863	0.783786	0.0106549	0.0164068	0.516241	0.712905	Wine_Alcohol	281.447	273.712	686.493	3714.94	0.0142039	0.0299182	2.10633	0.0351754	0.45231	NS	NS	NS
S8_Eggerthella lenta, Gordonibacter pamelaeae	Wine_Alcohol	205	205	-0.27214	0.559289	-0.118123	0.111491	0.290676	0.755952	Wine_Alcohol	126	126	-0.21131	0.583969	-0.128264	0.115385	0.2686	0.865489	Wine_Alcohol	223	223	-0.0117566	0.664384	0.0564482	0.056942	0.322646	0.880426	Wine_Alcohol	871	871	0.0981863	0.783786	-0.0450479	0.0241556	0.0625404	0.388441	Wine_Alcohol	80.4495	75.1108	308.414	1713.81	0.0214285	-0.0362437	-1.69138	0.0907645	0.45231	NS	NS	NS
S20_Lactococcus lactis	Sugar_Sweets	205	205	0.184389	1.11711	-0.0120696	0.048619	0.804198	0.93287	Sugar_Sweets	126	126	0.0308263	0.62208	-0.195131	0.140829	0.168441	0.65727	Sugar_Sweets	223	223	-0.0900997	0.489801	-0.051661	0.0727202	0.478263	0.660458	Sugar_Sweets	871	871	-0.0242716	0.577625	-0.0244313	0.0258542	0.344961	0.879516	Sugar_Sweets	423.047	50.4218	189.099	1496.02	0.0215236	-0.0283813	-1.31861	0.187298	0.452637	NS	NS	NS
S21_Clostridium bolteae, Coprobacillus	Wine_Alcohol	205	205	-0.27214	0.559289	-0.119186	0.114046	0.297275	0.755952	Wine_Alcohol	126	126	-0.21131	0.583969	-0.037311	0.0550465	0.499343	0.87106	Wine_Alcohol	223	223	-0.0117566	0.664384	-0.00171869	0.0260927	0.947548	0.947548	Wine_Alcohol	871	871	0.0981863	0.783786	-0.0119167	0.00958032	0.213901	0.620313	Wine_Alcohol	76.8853	330.02	1468.8	10895.3	0.00884885	-0.0120458	-1.36128	0.173424	0.457209	NS	NS	NS
28_Haemophilus, Veillonella	Fruit_Juice_Milk	205	205	0.0499406	0.971662	0.0615773	0.0306811	0.0463523	0.677861	Fruit_Juice_Milk	126	126	0.0470696	0.883709	0.00764582	0.0369487	0.836461	0.986097	Fruit_Juice_Milk	223	223	-0.0460608	0.585582	0.0136903	0.0258279	0.596661	0.958707	Fruit_Juice_Milk	871	871	-0.00752221	0.66348	0.0197087	0.0135828	0.147161	0.601738	Fruit_Juice_Milk	1062.33	732.489	1499.07	5420.27	0.0107124	0.0227635	2.12496	0.0335896	0.457448	NS	NS	NS
S12_Bacteroides finegoldii	Fruit_Juice_Milk	205	205	0.0499406	0.971662	-0.0116955	0.102203	0.909009	0.973185	Fruit_Juice_Milk	126	126	0.0470696	0.883709	-0.0219804	0.149448	0.883318	0.986097	Fruit_Juice_Milk	223	223	-0.0460608	0.585582	-0.0292429	0.113547	0.797005	0.969155	Fruit_Juice_Milk	871	871	-0.00752221	0.66348	0.1202	0.0472326	0.0111052	0.322051	Fruit_Juice_Milk	95.7361	44.7734	77.5622	448.246	0.03874	0.0742996	1.9179	0.0551232	0.457448	NS	NS	NS
S22_Mucin degraders	Fruit_Juice_Milk	205	205	0.0499406	0.971662	0.00340659	0.0307901	0.912015	0.973185	Fruit_Juice_Milk	126	126	0.0470696	0.883709	-0.0588972	0.0588976	0.319343	0.986097	Fruit_Juice_Milk	223	223	-0.0460608	0.585582	-0.068672	0.0634987	0.280716	0.958707	Fruit_Juice_Milk	871	871	-0.00752221	0.66348	-0.045418	0.0260687	0.081824	0.409767	Fruit_Juice_Milk	1054.82	288.273	248.011	1471.51	0.0180698	-0.0317537	-1.75728	0.0788703	0.457448	NS	NS	NS
S25_Lachnospiraceae bacterium 3 1 57FAA	Fruit_Juice_Milk	205	205	0.0499406	0.971662	-0.0897677	0.0800559	0.263506	0.677861	Fruit_Juice_Milk	126	126	0.0470696	0.883709	-0.0515409	0.0868968	0.554211	0.986097	Fruit_Juice_Milk	223	223	-0.0460608	0.585582	-0.135039	0.079162	0.0894663	0.518905	Fruit_Juice_Milk	871	871	-0.00752221	0.66348	-0.0252832	0.0585278	0.66586	0.943294	Fruit_Juice_Milk	156.032	132.432	159.575	291.928	0.0367616	-0.067249	-1.82933	0.0673504	0.457448	NS	NS	NS
S6_Bifidobacterium_pseudocatenulatum	Fruit_Juice_Milk	205	205	0.0499406	0.971662	-0.098586	0.0990161	0.320627	0.677861	Fruit_Juice_Milk	126	126	0.0470696	0.883709	0.0450205	0.155357	0.772478	0.986097	Fruit_Juice_Milk	223	223	-0.0460608	0.585582	0.32862	0.108661	0.00279283	0.0809922	Fruit_Juice_Milk	871	871	-0.00752221	0.66348	0.0911675	0.046788	0.0516753	0.409767	Fruit_Juice_Milk	101.997	41.4325	84.6933	456.806	0.03821	0.0894803	2.3418	0.019191	0.457448	NS	NS	NS
S15_Parabacteroides johnsonii	Meat_Potatoes_Gravy	205	205	0.0092388	0.66643	0.0870456	0.187512	0.643002	0.841698	Meat_Potatoes_Gravy	126	126	0.0317397	0.612627	0.270367	0.200556	0.18017	0.474992	Meat_Potatoes_Gravy	223	223	-0.12186	0.546907	0.00958538	0.109314	0.930207	0.963428	Meat_Potatoes_Gravy	871	871	0.0247565	0.537179	0.0863863	0.0641888	0.178715	0.905245	Meat_Potatoes_Gravy	28.4408	24.8617	83.6846	242.706	0.0513196	0.0815554	1.58917	0.112023	0.464095	NS	NS	NS
S6_Bifidobacterium_pseudocatenulatum	Meat_Potatoes_Gravy	205	205	0.0092388	0.66643	0.0620565	0.166389	0.709574	0.841698	Meat_Potatoes_Gravy	126	126	0.0317397	0.612627	-0.228017	0.222951	0.308496	0.515934	Meat_Potatoes_Gravy	223	223	-0.12186	0.546907	-0.201103	0.135294	0.138621	0.495345	Meat_Potatoes_Gravy	871	871	0.0247565	0.537179	-0.0728261	0.0633451	0.250597	0.905245	Meat_Potatoes_Gravy	36.1203	20.1179	54.6315	249.215	0.0526984	-0.0874284	-1.65903	0.0971095	0.464095	NS	NS	NS
S14_Odoribacter	Bread_Legumes	205	205	-0.0736819	0.691941	-0.0433543	0.0689948	0.530545	0.910931	Bread_Legumes	126	126	0.0277121	0.583927	-0.127729	0.180327	0.480121	0.732816	Bread_Legumes	223	223	-0.116311	0.444079	-0.0161142	0.119417	0.892791	0.935336	Bread_Legumes	871	871	0.0435099	0.579569	-0.0660502	0.0530466	0.213422	0.773653	Bread_Legumes	210.071	30.7524	70.1239	355.374	0.0387399	-0.0564862	-1.45809	0.144816	0.466628	NS	NS	NS
S10_Bacteroides eggerthii	Fruit_Juice_Milk	205	205	0.0499406	0.971662	-0.089577	0.0912096	0.327243	0.677861	Fruit_Juice_Milk	126	126	0.0470696	0.883709	0.018732	0.179009	0.916834	0.986097	Fruit_Juice_Milk	223	223	-0.0460608	0.585582	0.0812109	0.0915415	0.375981	0.958707	Fruit_Juice_Milk	871	871	-0.00752221	0.66348	-0.0890296	0.0488541	0.0687463	0.409767	Fruit_Juice_Milk	120.204	31.2068	119.334	418.984	0.0380768	-0.054795	-1.43906	0.150132	0.467391	NS	NS	NS
S17_Alistipes	Fruit_Juice_Milk	205	205	0.0499406	0.971662	0.118233	0.11361	0.299279	0.677861	Fruit_Juice_Milk	126	126	0.0470696	0.883709	0.293757	0.128421	0.0239213	0.693719	Fruit_Juice_Milk	223	223	-0.0460608	0.585582	9.39797e-05	0.104855	0.999286	0.999286	Fruit_Juice_Milk	871	871	-0.00752221	0.66348	0.0295305	0.0461337	0.522272	0.841438	Fruit_Juice_Milk	77.4762	60.6352	90.9547	469.855	0.0378256	0.0584557	1.5454	0.12225	0.467391	NS	NS	NS
S23_B. hydrogenotrophica	Fruit_Juice_Milk	205	205	0.0499406	0.971662	0.11247	0.0995038	0.259706	0.677861	Fruit_Juice_Milk	126	126	0.0470696	0.883709	-0.00331498	0.189833	0.986097	0.986097	Fruit_Juice_Milk	223	223	-0.0460608	0.585582	-0.0580487	0.117623	0.622147	0.958707	Fruit_Juice_Milk	871	871	-0.00752221	0.66348	-0.0801226	0.040915	0.0505194	0.409767	Fruit_Juice_Milk	101	27.7495	72.28	597.359	0.035391	-0.0510907	-1.44361	0.14885	0.467391	NS	NS	NS
S27_Turicibacter_sanguinis	Fruit_Juice_Milk	205	205	0.0499406	0.971662	-0.0169374	0.0305993	0.580528	0.841765	Fruit_Juice_Milk	126	126	0.0470696	0.883709	0.0139158	0.11775	0.906122	0.986097	Fruit_Juice_Milk	223	223	-0.0460608	0.585582	-0.0456442	0.0215314	0.035363	0.341842	Fruit_Juice_Milk	871	871	-0.00752221	0.66348	0.0280805	0.0335764	0.403222	0.717164	Fruit_Juice_Milk	1068.01	72.1239	2157.03	887.015	0.0154595	-0.0216611	-1.40115	0.161169	0.467391	NS	NS	NS
S7_Alistipes, Bacteroides	Fruit_Juice_Milk	205	205	0.0499406	0.971662	-0.0357267	0.0350522	0.309325	0.677861	Fruit_Juice_Milk	126	126	0.0470696	0.883709	-0.034241	0.0481985	0.478824	0.986097	Fruit_Juice_Milk	223	223	-0.0460608	0.585582	0.0178421	0.0456592	0.696353	0.96163	Fruit_Juice_Milk	871	871	-0.00752221	0.66348	-0.0281679	0.0204858	0.169488	0.601738	Fruit_Juice_Milk	813.899	430.461	479.671	2382.85	0.0156043	-0.0249286	-1.59755	0.110144	0.467391	NS	NS	NS
S10_Bacteroides eggerthii	Pasta_Pizza	205	205	-0.126846	0.636288	-0.0245735	0.146983	0.867394	0.941549	Pasta_Pizza	126	126	-0.0709619	0.607965	0.20571	0.248575	0.409564	0.989316	Pasta_Pizza	223	223	0.00315542	0.506156	0.0806165	0.121831	0.508861	0.670772	Pasta_Pizza	871	871	0.0399249	0.617093	0.0955425	0.0584825	0.102687	0.438792	Pasta_Pizza	46.2876	16.1839	67.3727	292.38	0.0486663	0.0842155	1.73047	0.0835468	0.484572	NS	NS	NS
S9_Bacteroides, Roseburia	Fastfood	205	205	0.059247	0.613728	-0.0509658	0.0630447	0.419826	0.744536	Fastfood	126	126	0.0181697	0.719587	0.00609533	0.080704	0.939921	0.996213	Fastfood	223	223	-0.0641103	0.381483	-0.122083	0.0825847	0.140783	0.453635	Fastfood	871	871	8.79047e-06	0.532809	-0.0250419	0.0289364	0.387052	0.701532	Fastfood	251.596	153.536	146.623	1194.29	0.0239316	-0.0341883	-1.42859	0.153123	0.493398	NS	NS	NS
S18_Lactobacillus delbrueckii	Icecream_Beer_non-alcoholic	205	205	-0.119788	0.542039	-0.0278257	0.213876	0.896617	0.963033	Icecream_Beer_non-alcoholic	126	126	-0.0410161	0.57799	-0.197377	0.175259	0.262327	0.808028	Icecream_Beer_non-alcoholic	223	223	-0.0245111	0.517043	-0.00371862	0.108414	0.972669	0.995352	Icecream_Beer_non-alcoholic	871	871	0.0407092	0.884625	-0.0422436	0.0312672	0.177032	0.746974	Icecream_Beer_non-alcoholic	21.8613	32.5567	85.0798	1022.87	0.0293311	-0.0434977	-1.48299	0.138077	0.500528	NS	NS	NS
S17_Alistipes	Pasta_Pizza	205	205	-0.126846	0.636288	-0.164614	0.182776	0.368873	0.596543	Pasta_Pizza	126	126	-0.0709619	0.607965	-0.0389417	0.182651	0.83153	0.989316	Pasta_Pizza	223	223	0.00315542	0.506156	0.235525	0.138518	0.0905027	0.37494	Pasta_Pizza	871	871	0.0399249	0.617093	0.0749936	0.0551594	0.174317	0.631899	Pasta_Pizza	29.9339	29.9748	52.1182	328.671	0.0476354	0.069954	1.46853	0.14196	0.514606	NS	NS	NS
S6_Bifidobacterium_pseudocatenulatum	Pasta_Pizza	205	205	-0.126846	0.636288	0.0240726	0.159576	0.880244	0.941549	Pasta_Pizza	126	126	-0.0709619	0.607965	0.0389718	0.216382	0.857373	0.989316	Pasta_Pizza	223	223	0.00315542	0.506156	-0.283203	0.146255	0.0541226	0.37494	Pasta_Pizza	871	871	0.0399249	0.617093	-0.0623049	0.0560709	0.266799	0.773717	Pasta_Pizza	39.2703	21.3578	46.7494	318.072	0.0484815	-0.0735207	-1.51647	0.129401	0.514606	NS	NS	NS
S7_Alistipes, Bacteroides	Pasta_Pizza	205	205	-0.126846	0.636288	0.166583	0.0552527	0.00290515	0.0286344	Pasta_Pizza	126	126	-0.0709619	0.607965	-0.0166789	0.0672406	0.804521	0.989316	Pasta_Pizza	223	223	0.00315542	0.506156	0.0404904	0.0606775	0.505286	0.670772	Pasta_Pizza	871	871	0.0399249	0.617093	0.00891061	0.0245389	0.716603	0.936609	Pasta_Pizza	327.561	221.175	271.61	1660.7	0.0200763	0.0309034	1.5393	0.123731	0.514606	NS	NS	NS
S20_Lactococcus lactis	Fastfood	205	205	0.059247	0.613728	0.00819957	0.113189	0.942323	0.975978	Fastfood	126	126	0.0181697	0.719587	0.11431	0.209897	0.587037	0.996213	Fastfood	223	223	-0.0641103	0.381483	-0.133622	0.113335	0.239772	0.467502	Fastfood	871	871	8.79047e-06	0.532809	-0.0478837	0.0386535	0.215784	0.566579	Fastfood	78.0531	22.6981	77.8521	669.301	0.0343421	-0.0462514	-1.34678	0.17805	0.516344	NS	NS	NS
S18_Lactobacillus delbrueckii	Wine_Alcohol	205	205	-0.27214	0.559289	-0.0573428	0.211793	0.786865	0.875346	Wine_Alcohol	126	126	-0.21131	0.583969	0.130761	0.173274	0.451941	0.87106	Wine_Alcohol	223	223	-0.0117566	0.664384	0.0215673	0.0832695	0.795876	0.934278	Wine_Alcohol	871	871	0.0981863	0.783786	-0.0558924	0.0349237	0.109871	0.398282	Wine_Alcohol	22.2933	33.3066	144.221	819.9	0.0313155	-0.0388723	-1.24131	0.21449	0.518352	NS	NS	NS
S4_Bifidobacterium_catenulatum	Meat	205	205	0.0153272	0.592254	0.158602	0.13933	0.256354	0.814157	Meat	126	126	0.00509592	0.600788	-0.00784747	0.100891	0.938131	0.958865	Meat	223	223	-0.0138947	0.560121	-0.171021	0.118212	0.149416	0.634441	Meat	871	871	-0.0016754	0.624155	-0.0598062	0.0324662	0.0658225	0.477213	Meat	51.5126	98.2411	71.5608	948.717	0.0292349	-0.0526297	-1.80024	0.0718231	0.520718	NS	NS	NS
S12_Bacteroides finegoldii	Dairy_Cereals	205	205	-0.161259	0.558239	0.0734303	0.184536	0.691117	0.871408	Dairy_Cereals	126	126	-0.0521211	0.621192	-0.222649	0.176631	0.209923	0.816001	Dairy_Cereals	223	223	-0.0111794	0.671357	-0.0195353	0.101318	0.847286	0.919942	Dairy_Cereals	871	871	0.0462207	0.622802	-0.049156	0.0496125	0.322061	0.572654	Dairy_Cereals	29.3655	32.0529	97.4152	406.273	0.0420663	-0.0475203	-1.12965	0.258623	0.522424	NS	NS	NS
S19_Streptococci, L. sakei	Dairy_Cereals	205	205	-0.161259	0.558239	-0.00291221	0.0468574	0.95051	0.986402	Dairy_Cereals	126	126	-0.0521211	0.621192	0.133225	0.0757399	0.0812876	0.715198	Dairy_Cereals	223	223	-0.0111794	0.671357	-0.0324153	0.054521	0.552786	0.919942	Dairy_Cereals	871	871	0.0462207	0.622802	-0.0393404	0.023998	0.101524	0.420601	Dairy_Cereals	455.454	174.321	336.413	1736.4	0.0192358	-0.0212086	-1.10256	0.270219	0.522424	NS	NS	NS
S15_Parabacteroides johnsonii	Ready_meals	205	205	-0.0761095	0.668047	-0.0612695	0.165861	0.71222	0.826175	Ready_meals	126	126	-0.0726462	0.963861	-0.180021	0.112464	0.112073	0.982067	Ready_meals	223	223	0.0593805	0.744316	0.0740258	0.0681584	0.278646	0.993664	Ready_meals	871	871	0.0135936	0.640699	0.0980461	0.0495166	0.0480128	0.413063	Ready_meals	36.3508	79.0627	215.259	407.847	0.0367975	0.0534345	1.45212	0.146468	0.525746	NS	NS	NS
S25_Lachnospiraceae bacterium 3 1 57FAA	Ready_meals	205	205	-0.0761095	0.668047	-0.116794	0.118803	0.326759	0.790066	Ready_meals	126	126	-0.0726462	0.963861	0.00211563	0.0705266	0.976119	0.982067	Ready_meals	223	223	0.0593805	0.744316	-0.00202503	0.0610742	0.97358	0.993664	Ready_meals	871	871	0.0135936	0.640699	-0.1135	0.0609987	0.0631263	0.413063	Ready_meals	70.8507	201.045	268.092	268.756	0.0351637	-0.0480947	-1.36774	0.171394	0.525746	NS	NS	NS
S5_Streptococcus, Bifidobacterium dentium	Ready_meals	205	205	-0.0761095	0.668047	-0.0564933	0.0439771	0.200527	0.726912	Ready_meals	126	126	-0.0726462	0.963861	-0.00102623	0.0398256	0.979489	0.982067	Ready_meals	223	223	0.0593805	0.744316	-0.00944336	0.0161356	0.559074	0.993664	Ready_meals	871	871	0.0135936	0.640699	-0.0112068	0.0116658	0.337012	0.814445	Ready_meals	517.067	630.486	3840.87	7348	0.00900337	-0.0120356	-1.33679	0.181292	0.525746	NS	NS	NS
S7_Alistipes, Bacteroides	Ready_meals	205	205	-0.0761095	0.668047	0.109526	0.0515336	0.0347913	0.564307	Ready_meals	126	126	-0.0726462	0.963861	0.00343129	0.0391423	0.930291	0.982067	Ready_meals	223	223	0.0593805	0.744316	0.00276512	0.0350045	0.937111	0.993664	Ready_meals	871	871	0.0135936	0.640699	0.0231951	0.0213998	0.278714	0.734791	Ready_meals	376.547	652.692	816.116	2183.63	0.0157544	0.0239236	1.51853	0.12888	0.525746	NS	NS	NS
S9_Bacteroides, Roseburia	Ready_meals	205	205	-0.0761095	0.668047	-0.0467248	0.04061	0.251295	0.728757	Ready_meals	126	126	-0.0726462	0.963861	0.00690545	0.0366125	0.850718	0.982067	Ready_meals	223	223	0.0593805	0.744316	-0.00158525	0.0328238	0.961525	0.993664	Ready_meals	871	871	0.0135936	0.640699	-0.0260765	0.017336	0.132899	0.55058	Ready_meals	606.366	746.003	928.161	3327.39	0.0133536	-0.0198681	-1.48785	0.136792	0.525746	NS	NS	NS
S1_Acetate/butyrate producers	Sweetened_tea_yoghurtdrink	205	205	0.111425	1.12755	-0.0365075	0.0344413	0.290432	0.739706	Sweetened_tea_yoghurtdrink	126	126	0.0674218	0.540567	-0.0950683	0.051854	0.0692874	0.408591	Sweetened_tea_yoghurtdrink	223	223	0.00250442	0.480442	0.0141473	0.0361911	0.696252	0.877896	Sweetened_tea_yoghurtdrink	871	871	-0.0373747	0.434722	-0.0127876	0.0180828	0.479655	0.901398	Sweetened_tea_yoghurtdrink	843.027	371.908	763.476	3058.2	0.0140906	-0.0187506	-1.33071	0.183284	0.531958	NS	NS	NS
S16_Propionate/succinate producers	Sweetened_tea_yoghurtdrink	205	205	0.111425	1.12755	-0.0204499	0.0247499	0.409702	0.910507	Sweetened_tea_yoghurtdrink	126	126	0.0674218	0.540567	0.0980021	0.106571	0.359629	0.768655	Sweetened_tea_yoghurtdrink	223	223	0.00250442	0.480442	0.0174935	0.080604	0.828393	0.901817	Sweetened_tea_yoghurtdrink	871	871	-0.0373747	0.434722	-0.103528	0.0543472	0.0571214	0.561344	Sweetened_tea_yoghurtdrink	1632.51	88.0486	153.917	338.568	0.0212572	-0.0258081	-1.21409	0.224713	0.531958	NS	NS	NS
S17_Alistipes	Sweetened_tea_yoghurtdrink	205	205	0.111425	1.12755	0.318598	0.0994627	0.00158278	0.014249	Sweetened_tea_yoghurtdrink	126	126	0.0674218	0.540567	0.0522909	0.184399	0.777225	0.894649	Sweetened_tea_yoghurtdrink	223	223	0.00250442	0.480442	0.00368924	0.123867	0.976267	0.976267	Sweetened_tea_yoghurtdrink	871	871	-0.0373747	0.434722	-0.0198212	0.0672396	0.768229	0.901398	Sweetened_tea_yoghurtdrink	101.083	29.4093	65.1764	221.182	0.048979	0.0710065	1.44973	0.147132	0.531958	NS	NS	NS
S20_Lactococcus lactis	Sweetened_tea_yoghurtdrink	205	205	0.111425	1.12755	0.00822677	0.0440466	0.852028	0.927838	Sweetened_tea_yoghurtdrink	126	126	0.0674218	0.540567	-0.161453	0.164771	0.329128	0.768655	Sweetened_tea_yoghurtdrink	223	223	0.00250442	0.480442	-0.104989	0.0674169	0.120945	0.501058	Sweetened_tea_yoghurtdrink	871	871	-0.0373747	0.434722	-0.0253834	0.0319363	0.426957	0.901398	Sweetened_tea_yoghurtdrink	515.437	36.8329	220.02	980.461	0.0238858	-0.0283518	-1.18697	0.235239	0.531958	NS	NS	NS
S21_Clostridium bolteae, Coprobacillus	Sweetened_tea_yoghurtdrink	205	205	0.111425	1.12755	-0.0165855	0.0594044	0.780389	0.927838	Sweetened_tea_yoghurtdrink	126	126	0.0674218	0.540567	-0.00383284	0.059583	0.948828	0.950296	Sweetened_tea_yoghurtdrink	223	223	0.00250442	0.480442	0.0606336	0.0361621	0.0951677	0.501058	Sweetened_tea_yoghurtdrink	871	871	-0.0373747	0.434722	0.0161436	0.0178401	0.365778	0.901398	Sweetened_tea_yoghurtdrink	283.376	281.68	764.704	3142	0.0149541	0.0204194	1.36547	0.172106	0.531958	NS	NS	NS
S22_Mucin degraders	Sweetened_tea_yoghurtdrink	205	205	0.111425	1.12755	-0.00575995	0.027589	0.834838	0.927838	Sweetened_tea_yoghurtdrink	126	126	0.0674218	0.540567	-0.174782	0.0834953	0.0384451	0.37509	Sweetened_tea_yoghurtdrink	223	223	0.00250442	0.480442	-0.119913	0.0747848	0.110327	0.501058	Sweetened_tea_yoghurtdrink	871	871	-0.0373747	0.434722	-0.0118078	0.0380704	0.756517	0.901398	Sweetened_tea_yoghurtdrink	1313.8	143.442	178.802	689.96	0.0207346	-0.0267523	-1.29023	0.196971	0.531958	NS	NS	NS
S27_Turicibacter_sanguinis	Sweetened_tea_yoghurtdrink	205	205	0.111425	1.12755	0.0151024	0.0273966	0.58208	0.927838	Sweetened_tea_yoghurtdrink	126	126	0.0674218	0.540567	-0.0970552	0.165333	0.558288	0.768655	Sweetened_tea_yoghurtdrink	223	223	0.00250442	0.480442	0.0494259	0.0260924	0.0597669	0.501058	Sweetened_tea_yoghurtdrink	871	871	-0.0373747	0.434722	-0.0151281	0.0499587	0.76211	0.901398	Sweetened_tea_yoghurtdrink	1332.31	36.5829	1468.84	400.662	0.0175726	0.0256633	1.46042	0.144175	0.531958	NS	NS	NS
S5_Streptococcus, Bifidobacterium dentium	Sweetened_tea_yoghurtdrink	205	205	0.111425	1.12755	0.0818577	0.0628984	0.194722	0.705866	Sweetened_tea_yoghurtdrink	126	126	0.0674218	0.540567	0.0463497	0.07214	0.5219	0.768655	Sweetened_tea_yoghurtdrink	223	223	0.00250442	0.480442	0.0239102	0.0262311	0.363175	0.806662	Sweetened_tea_yoghurtdrink	871	871	-0.0373747	0.434722	0.00641726	0.016609	0.699321	0.901398	Sweetened_tea_yoghurtdrink	252.767	192.153	1453.34	3625.06	0.0134555	0.0158618	1.17884	0.238464	0.531958	NS	NS	NS
S12_Bacteroides finegoldii	Meat_Potatoes_Gravy	205	205	0.0092388	0.66643	0.128635	0.17114	0.453157	0.838075	Meat_Potatoes_Gravy	126	126	0.0317397	0.612627	0.572196	0.208917	0.0071054	0.0686856	Meat_Potatoes_Gravy	223	223	-0.12186	0.546907	-0.0831203	0.139098	0.550754	0.822655	Meat_Potatoes_Gravy	871	871	0.0247565	0.537179	-0.143749	0.0639079	0.0247435	0.35878	Meat_Potatoes_Gravy	34.1426	22.9114	51.684	244.845	0.0531808	-0.0621931	-1.16947	0.242216	0.532712	NS	NS	NS
S13_Escherichia coli, Bacteroides fragilis	Meat_Potatoes_Gravy	205	205	0.0092388	0.66643	-0.0426658	0.0858254	0.619674	0.841698	Meat_Potatoes_Gravy	126	126	0.0317397	0.612627	0.0897507	0.0806184	0.267891	0.515934	Meat_Potatoes_Gravy	223	223	-0.12186	0.546907	-0.0181561	0.045757	0.691924	0.822655	Meat_Potatoes_Gravy	871	871	0.0247565	0.537179	0.0317376	0.0240803	0.187861	0.905245	Meat_Potatoes_Gravy	135.759	153.862	477.624	1724.55	0.0200329	0.0217025	1.08334	0.278656	0.532712	NS	NS	NS
S19_Streptococci, L. sakei	Meat_Potatoes_Gravy	205	205	0.0092388	0.66643	0.10187	0.042469	0.0174419	0.168605	Meat_Potatoes_Gravy	126	126	0.0317397	0.612627	0.300058	0.0888891	0.00101017	0.0292949	Meat_Potatoes_Gravy	223	223	-0.12186	0.546907	-0.0406924	0.073782	0.581862	0.822655	Meat_Potatoes_Gravy	871	871	0.0247565	0.537179	-0.0277048	0.0308498	0.369415	0.905245	Meat_Potatoes_Gravy	554.441	126.562	183.696	1050.74	0.0228489	0.030213	1.3223	0.18607	0.532712	NS	NS	NS
S2_Bifidobacterium animalis	Meat_Potatoes_Gravy	205	205	0.0092388	0.66643	-0.0867297	0.0645469	0.180585	0.748138	Meat_Potatoes_Gravy	126	126	0.0317397	0.612627	-0.192318	0.215345	0.373607	0.515934	Meat_Potatoes_Gravy	223	223	-0.12186	0.546907	-0.276349	0.193049	0.153728	0.495345	Meat_Potatoes_Gravy	871	871	0.0247565	0.537179	0.0285036	0.0703841	0.685598	0.909477	Meat_Potatoes_Gravy	240.021	21.564	26.8327	201.86	0.0451626	-0.054307	-1.20248	0.229178	0.532712	NS	NS	NS
S21_Clostridium bolteae, Coprobacillus	Meat_Potatoes_Gravy	205	205	0.0092388	0.66643	-0.0884473	0.111988	0.430602	0.838075	Meat_Potatoes_Gravy	126	126	0.0317397	0.612627	0.0694728	0.0637895	0.278537	0.515934	Meat_Potatoes_Gravy	223	223	-0.12186	0.546907	-0.0290308	0.0372202	0.436333	0.822655	Meat_Potatoes_Gravy	871	871	0.0247565	0.537179	-0.0155523	0.0161872	0.336945	0.905245	Meat_Potatoes_Gravy	79.7369	245.754	721.841	3816.4	0.0143389	-0.0144516	-1.00786	0.31352	0.532712	NS	NS	NS
S22_Mucin degraders	Meat_Potatoes_Gravy	205	205	0.0092388	0.66643	-0.0139653	0.0521607	0.789183	0.847641	Meat_Potatoes_Gravy	126	126	0.0317397	0.612627	0.0690753	0.0850604	0.418371	0.537579	Meat_Potatoes_Gravy	223	223	-0.12186	0.546907	0.106683	0.0776944	0.171167	0.496384	Meat_Potatoes_Gravy	871	871	0.0247565	0.537179	0.0190545	0.0354077	0.590615	0.909477	Meat_Potatoes_Gravy	367.547	138.212	165.661	797.635	0.0260904	0.0253809	0.972807	0.330649	0.532712	NS	NS	NS
S23_B. hydrogenotrophica	Meat_Potatoes_Gravy	205	205	0.0092388	0.66643	0.150964	0.167044	0.367227	0.838075	Meat_Potatoes_Gravy	126	126	0.0317397	0.612627	-0.2986	0.272156	0.274766	0.515934	Meat_Potatoes_Gravy	223	223	-0.12186	0.546907	0.056485	0.144218	0.695691	0.822655	Meat_Potatoes_Gravy	871	871	0.0247565	0.537179	0.0492269	0.055412	0.374584	0.905245	Meat_Potatoes_Gravy	35.8376	13.5009	48.0797	325.68	0.048616	0.04757	0.978485	0.327835	0.532712	NS	NS	NS
S25_Lachnospiraceae bacterium 3 1 57FAA	Meat_Potatoes_Gravy	205	205	0.0092388	0.66643	-0.322603	0.132708	0.0159465	0.168605	Meat_Potatoes_Gravy	126	126	0.0317397	0.612627	0.181024	0.124293	0.147885	0.448366	Meat_Potatoes_Gravy	223	223	-0.12186	0.546907	0.233737	0.0963922	0.0161329	0.155952	Meat_Potatoes_Gravy	871	871	0.0247565	0.537179	0.021694	0.0791315	0.784034	0.937995	Meat_Potatoes_Gravy	56.7812	64.7302	107.626	159.698	0.0507127	0.0566319	1.11672	0.264114	0.532712	NS	NS	NS
S27_Turicibacter_sanguinis	Meat_Potatoes_Gravy	205	205	0.0092388	0.66643	-0.0167464	0.0513358	0.744607	0.841698	Meat_Potatoes_Gravy	126	126	0.0317397	0.612627	0.108275	0.169379	0.523879	0.6077	Meat_Potatoes_Gravy	223	223	-0.12186	0.546907	0.0400383	0.0274069	0.145762	0.495345	Meat_Potatoes_Gravy	871	871	0.0247565	0.537179	0.0207147	0.0455899	0.649684	0.909477	Meat_Potatoes_Gravy	379.454	34.8562	1331.31	481.13	0.0211916	0.0272547	1.28611	0.198405	0.532712	NS	NS	NS
S4_Bifidobacterium_catenulatum	Meat_Potatoes_Gravy	205	205	0.0092388	0.66643	-0.154173	0.140328	0.273243	0.838075	Meat_Potatoes_Gravy	126	126	0.0317397	0.612627	-0.105005	0.115013	0.363081	0.515934	Meat_Potatoes_Gravy	223	223	-0.12186	0.546907	-0.235998	0.138701	0.090284	0.495345	Meat_Potatoes_Gravy	871	871	0.0247565	0.537179	-0.00425607	0.0410855	0.91752	0.981688	Meat_Potatoes_Gravy	50.7823	75.5978	51.9803	592.409	0.0360195	-0.0396435	-1.10061	0.271066	0.532712	NS	NS	NS
S8_Eggerthella lenta, Gordonibacter pamelaeae	Meat_Potatoes_Gravy	205	205	0.0092388	0.66643	-0.00610902	0.10815	0.955011	0.955011	Meat_Potatoes_Gravy	126	126	0.0317397	0.612627	0.221576	0.121814	0.0714948	0.345558	Meat_Potatoes_Gravy	223	223	-0.12186	0.546907	-0.0608872	0.0838378	0.468479	0.822655	Meat_Potatoes_Gravy	871	871	0.0247565	0.537179	0.0412662	0.0409102	0.313405	0.905245	Meat_Potatoes_Gravy	85.4968	67.3917	142.272	597.499	0.0334701	0.0340601	1.01763	0.308855	0.532712	NS	NS	NS
S16_Propionate/succinate producers	Spreads_sweet	205	205	-0.0555374	0.536875	0.0143271	0.0529296	0.786932	0.94012	Spreads_sweet	126	126	0.0129582	0.465282	-0.0507594	0.126134	0.688088	0.978735	Spreads_sweet	223	223	-0.0241369	0.470388	0.0848575	0.0885151	0.338807	0.73693	Spreads_sweet	871	871	0.0180257	0.519839	-0.10029	0.0467073	0.0320555	0.185922	Spreads_sweet	356.946	62.8543	127.634	458.384	0.0315312	-0.0330252	-1.04738	0.294923	0.534548	NS	NS	NS
S27_Turicibacter_sanguinis	Fastfood	205	205	0.059247	0.613728	0.0442201	0.0703816	0.530534	0.744536	Fastfood	126	126	0.0181697	0.719587	0.49812	0.205361	0.0167732	0.321752	Fastfood	223	223	-0.0641103	0.381483	-0.0581166	0.0439239	0.187445	0.467502	Fastfood	871	871	8.79047e-06	0.532809	-0.105991	0.0580772	0.0683655	0.330433	Fastfood	201.875	23.7117	518.321	296.475	0.031003	-0.0392248	-1.26519	0.205802	0.542569	NS	NS	NS
S21_Clostridium bolteae, Coprobacillus	Dairy_Cereals	205	205	-0.161259	0.558239	-0.00353762	0.119853	0.976483	0.986402	Dairy_Cereals	126	126	-0.0521211	0.621192	-0.01401	0.0499739	0.779749	0.958129	Dairy_Cereals	223	223	-0.0111794	0.671357	-0.0133241	0.0283105	0.638413	0.919942	Dairy_Cereals	871	871	0.0462207	0.622802	-0.011115	0.0125271	0.375187	0.572654	Dairy_Cereals	69.6151	400.418	1247.68	6372.32	0.011118	-0.0115338	-1.0374	0.299547	0.542929	NS	NS	NS
S24_Ruminococcus S24_Ruminococcus gnavus, Lachnospiraceae bacterium 1 1 57FAA, Lachnospiraceae bacterium	Sugar_Sweets	205	205	0.184389	1.11711	-0.00438152	0.0856424	0.959249	0.99832	Sugar_Sweets	126	126	0.0308263	0.62208	0.031944	0.0946091	0.736243	0.928307	Sugar_Sweets	223	223	-0.0900997	0.489801	-0.0373588	0.0446737	0.403978	0.64684	Sugar_Sweets	871	871	-0.0242716	0.577625	-0.019144	0.0188532	0.310196	0.879516	Sugar_Sweets	136.34	111.721	501.067	2813.4	0.0167541	-0.0195388	-1.16621	0.243529	0.543257	NS	NS	NS
S2_Bifidobacterium animalis	Pastry_Sweets	205	205	-0.0467602	0.641192	-0.0855004	0.0626456	0.173848	0.546219	Pastry_Sweets	126	126	0.0864701	0.764689	-0.331283	0.20475	0.108291	0.985666	Pastry_Sweets	223	223	0.04413	0.575045	0.0028317	0.174221	0.987047	0.990186	Pastry_Sweets	871	871	-0.0122277	0.629675	-0.0597445	0.0596795	0.317064	0.707296	Pastry_Sweets	254.812	23.8535	32.9456	280.769	0.0410866	-0.0782772	-1.90518	0.0567568	0.54865	NS	NS	NS
S21_Clostridium bolteae, Coprobacillus	Pastry_Sweets	205	205	-0.0467602	0.641192	0.126596	0.108532	0.244857	0.546219	Pastry_Sweets	126	126	0.0864701	0.764689	0.00177736	0.0607363	0.976708	0.985666	Pastry_Sweets	223	223	0.04413	0.575045	-0.0216182	0.0341832	0.527837	0.862303	Pastry_Sweets	871	871	-0.0122277	0.629675	0.0304797	0.0137387	0.0267904	0.388461	Pastry_Sweets	84.8947	271.084	855.805	5297.94	0.0123942	0.0236888	1.91128	0.0559685	0.54865	NS	NS	NS
S8_Eggerthella lenta, Gordonibacter pamelaeae	Ready_meals	205	205	-0.0761095	0.668047	-0.0600692	0.0956073	0.530541	0.826175	Ready_meals	126	126	-0.0726462	0.963861	-0.0271211	0.0693217	0.696341	0.982067	Ready_meals	223	223	0.0593805	0.744316	-0.0686627	0.0516662	0.185274	0.993664	Ready_meals	871	871	0.0135936	0.640699	-0.0136514	0.0316124	0.665969	0.96952	Ready_meals	109.4	208.095	374.617	1000.66	0.0243053	-0.0304814	-1.2541	0.209804	0.553121	NS	NS	NS
S11_Bacteroides faecis	Dairy_Lean_beef	205	205	-0.201195	0.55624	-0.103524	0.136458	0.448958	0.943996	Dairy_Lean_beef	126	126	-0.146976	0.56817	-0.0556178	0.21251	0.793987	0.947445	Dairy_Lean_beef	223	223	0.0254258	0.537627	0.100418	0.138853	0.47034	0.850788	Dairy_Lean_beef	871	871	0.0612162	0.608226	-0.0605886	0.054429	0.265946	0.514163	Dairy_Lean_beef	53.7035	22.1433	51.8665	337.55	0.0463607	-0.0473593	-1.02154	0.307	0.556437	NS	NS	NS
S13_Escherichia coli, Bacteroides fragilis	Dairy_Lean_beef	205	205	-0.201195	0.55624	0.00199254	0.0906692	0.98249	0.98249	Dairy_Lean_beef	126	126	-0.146976	0.56817	0.000525867	0.0745682	0.994385	0.994385	Dairy_Lean_beef	223	223	0.0254258	0.537627	-0.0127009	0.041827	0.761693	0.924253	Dairy_Lean_beef	871	871	0.0612162	0.608226	0.0263488	0.0190401	0.166763	0.384547	Dairy_Lean_beef	121.641	179.843	571.594	2758.42	0.0165942	0.0181078	1.09121	0.275181	0.556437	NS	NS	NS
S7_Alistipes, Bacteroides	Dairy_Lean_beef	205	205	-0.201195	0.55624	0.117454	0.0615229	0.0576857	0.557629	Dairy_Lean_beef	126	126	-0.146976	0.56817	0.0195828	0.0636305	0.7588	0.947445	Dairy_Lean_beef	223	223	0.0254258	0.537627	0.019799	0.0511351	0.698996	0.921403	Dairy_Lean_beef	871	871	0.0612162	0.608226	0.00676301	0.0220167	0.758783	0.856431	Dairy_Lean_beef	264.196	246.984	382.438	2062.98	0.0183909	0.0194113	1.05548	0.291205	0.556437	NS	NS	NS
S13_Escherichia coli, Bacteroides fragilis	Dairy_Cereals	205	205	-0.161259	0.558239	0.0777731	0.0922406	0.400196	0.659005	Dairy_Cereals	126	126	-0.0521211	0.621192	-0.00558672	0.0667791	0.933471	0.986382	Dairy_Cereals	223	223	-0.0111794	0.671357	0.00471741	0.0335214	0.88822	0.919942	Dairy_Cereals	871	871	0.0462207	0.622802	0.0173718	0.0186892	0.352889	0.572654	Dairy_Cereals	117.532	224.243	889.929	2862.97	0.0156275	0.0150979	0.96611	0.333989	0.569746	NS	NS	NS
S27_Turicibacter_sanguinis	Pastry_Sweets	205	205	-0.0467602	0.641192	0.0186227	0.0498266	0.708988	0.934575	Pastry_Sweets	126	126	0.0864701	0.764689	0.0320675	0.162504	0.843901	0.985666	Pastry_Sweets	223	223	0.04413	0.575045	0.0587435	0.0244947	0.0174804	0.506931	Pastry_Sweets	871	871	-0.0122277	0.629675	-0.0213909	0.0386195	0.579807	0.850062	Pastry_Sweets	402.789	37.8679	1666.7	670.482	0.0189735	0.0332204	1.75089	0.0799657	0.579751	NS	NS	NS
S23_B. hydrogenotrophica	Bread_Legumes	205	205	-0.0736819	0.691941	-0.011359	0.157724	0.94266	0.976539	Bread_Legumes	126	126	0.0277121	0.583927	-0.0307692	0.259986	0.905989	0.962141	Bread_Legumes	223	223	-0.116311	0.444079	-0.303163	0.163494	0.0650569	0.813769	Bread_Legumes	871	871	0.0435099	0.579569	-0.0403795	0.0503766	0.423032	0.889746	Bread_Legumes	40.198	14.7945	37.4107	394.041	0.0453402	-0.0578988	-1.27699	0.201607	0.584661	NS	NS	NS
S10_Bacteroides eggerthii	Bread_Legumes	205	205	-0.0736819	0.691941	0.38695	0.141838	0.00693954	0.201247	Bread_Legumes	126	126	0.0277121	0.583927	0.453723	0.241663	0.0628771	0.40872	Bread_Legumes	223	223	-0.116311	0.444079	0.0362586	0.128382	0.777886	0.935336	Bread_Legumes	871	871	0.0435099	0.579569	-0.016858	0.0601536	0.779354	0.916912	Bread_Legumes	49.7069	17.123	60.6721	276.361	0.0497603	0.0607735	1.22132	0.221963	0.585175	NS	NS	NS
S11_Bacteroides faecis	Wine_Alcohol	205	205	-0.27214	0.559289	-0.0976424	0.133182	0.464329	0.79209	Wine_Alcohol	126	126	-0.21131	0.583969	-0.0537582	0.202636	0.791238	0.892704	Wine_Alcohol	223	223	-0.0117566	0.664384	-0.0704406	0.104449	0.500775	0.934278	Wine_Alcohol	871	871	0.0981863	0.783786	-0.0272539	0.0405866	0.502081	0.712905	Wine_Alcohol	56.3781	24.3539	91.6618	607.065	0.0358182	-0.0382518	-1.06794	0.285546	0.591488	NS	NS	NS
S20_Lactococcus lactis	Wine_Alcohol	205	205	-0.27214	0.559289	0.0198725	0.0848095	0.814978	0.875346	Wine_Alcohol	126	126	-0.21131	0.583969	0.0509133	0.147786	0.731068	0.892704	Wine_Alcohol	223	223	-0.0117566	0.664384	0.0592316	0.0482769	0.221269	0.802099	Wine_Alcohol	871	871	0.0981863	0.783786	0.011577	0.0174604	0.507494	0.712905	Wine_Alcohol	139.031	45.7862	429.064	3280.14	0.0160251	0.0175865	1.09743	0.272451	0.591488	NS	NS	NS
28_Haemophilus, Veillonella	Porridge_ready_Fish_fried_Chocolatemilk	205	205	0.0773975	0.762121	0.0233077	0.0351493	0.508172	0.892969	Porridge_ready_Fish_fried_Chocolatemilk	126	126	0.129518	0.829902	0.0384045	0.0314564	0.224841	0.640831	Porridge_ready_Fish_fried_Chocolatemilk	223	223	-0.0295003	0.594099	0.00776876	0.0224784	0.730001	0.880971	Porridge_ready_Fish_fried_Chocolatemilk	871	871	-0.0289628	0.569582	0.0132825	0.0153664	0.387629	0.857665	Porridge_ready_Fish_fried_Chocolatemilk	809.407	1010.6	1979.11	4235.03	0.0111566	0.0160943	1.44259	0.149137	0.593169	NS	NS	NS
S12_Bacteroides finegoldii	Porridge_ready_Fish_fried_Chocolatemilk	205	205	0.0773975	0.762121	0.0251329	0.128596	0.845247	0.892969	Porridge_ready_Fish_fried_Chocolatemilk	126	126	0.129518	0.829902	7.26674e-05	0.137364	0.999579	0.999579	Porridge_ready_Fish_fried_Chocolatemilk	223	223	-0.0295003	0.594099	-0.0830071	0.109358	0.44865	0.786947	Porridge_ready_Fish_fried_Chocolatemilk	871	871	-0.0289628	0.569582	-0.075596	0.0531084	0.154973	0.857665	Porridge_ready_Fish_fried_Chocolatemilk	60.4712	52.997	83.6186	354.546	0.042577	-0.0584076	-1.37181	0.170122	0.593169	NS	NS	NS
S13_Escherichia coli, Bacteroides fragilis	Porridge_ready_Fish_fried_Chocolatemilk	205	205	0.0773975	0.762121	-0.0118396	0.0637449	0.852851	0.892969	Porridge_ready_Fish_fried_Chocolatemilk	126	126	0.129518	0.829902	-0.077319	0.050999	0.132217	0.640831	Porridge_ready_Fish_fried_Chocolatemilk	223	223	-0.0295003	0.594099	-0.00831378	0.0356915	0.81604	0.883008	Porridge_ready_Fish_fried_Chocolatemilk	871	871	-0.0289628	0.569582	-0.0236665	0.0201476	0.24046	0.857665	Porridge_ready_Fish_fried_Chocolatemilk	246.099	384.483	785.003	2463.5	0.0160559	-0.0251271	-1.56498	0.117589	0.593169	NS	NS	NS
S15_Parabacteroides johnsonii	Porridge_ready_Fish_fried_Chocolatemilk	205	205	0.0773975	0.762121	0.174803	0.140241	0.214066	0.892969	Porridge_ready_Fish_fried_Chocolatemilk	126	126	0.129518	0.829902	-0.0820775	0.128676	0.524778	0.839333	Porridge_ready_Fish_fried_Chocolatemilk	223	223	-0.0295003	0.594099	-0.0596051	0.0858912	0.48845	0.786947	Porridge_ready_Fish_fried_Chocolatemilk	871	871	-0.0289628	0.569582	0.104509	0.053186	0.0497381	0.755971	Porridge_ready_Fish_fried_Chocolatemilk	50.8451	60.3957	135.551	353.513	0.0408145	0.0546329	1.33857	0.180712	0.593169	NS	NS	NS
S19_Streptococci, L. sakei	Porridge_ready_Fish_fried_Chocolatemilk	205	205	0.0773975	0.762121	0.0545656	0.032538	0.0952258	0.892969	Porridge_ready_Fish_fried_Chocolatemilk	126	126	0.129518	0.829902	-0.0057908	0.0589243	0.921888	0.990176	Porridge_ready_Fish_fried_Chocolatemilk	223	223	-0.0295003	0.594099	0.137937	0.0566939	0.0158103	0.458499	Porridge_ready_Fish_fried_Chocolatemilk	871	871	-0.0289628	0.569582	-0.00164339	0.0254302	0.948489	0.994502	Porridge_ready_Fish_fried_Chocolatemilk	944.537	288.012	311.12	1546.33	0.0179896	0.0292056	1.62347	0.104488	0.593169	NS	NS	NS
S25_Lachnospiraceae bacterium 3 1 57FAA	Porridge_ready_Fish_fried_Chocolatemilk	205	205	0.0773975	0.762121	-0.0343505	0.101024	0.734199	0.892969	Porridge_ready_Fish_fried_Chocolatemilk	126	126	0.129518	0.829902	-0.0859563	0.0795947	0.282341	0.640831	Porridge_ready_Fish_fried_Chocolatemilk	223	223	-0.0295003	0.594099	-0.0862874	0.0766174	0.26132	0.786947	Porridge_ready_Fish_fried_Chocolatemilk	871	871	-0.0289628	0.569582	-0.0105385	0.0656467	0.872498	0.994502	Porridge_ready_Fish_fried_Chocolatemilk	97.9823	157.845	170.351	232.046	0.0389774	-0.0517727	-1.32828	0.184087	0.593169	NS	NS	NS
S29_Sutterella wadsworthensis	Porridge_ready_Fish_fried_Chocolatemilk	205	205	0.0773975	0.762121	-0.0178446	0.0835098	0.831025	0.892969	Porridge_ready_Fish_fried_Chocolatemilk	126	126	0.129518	0.829902	-0.051978	0.0674811	0.442827	0.770777	Porridge_ready_Fish_fried_Chocolatemilk	223	223	-0.0295003	0.594099	-0.0687515	0.0680828	0.313705	0.786947	Porridge_ready_Fish_fried_Chocolatemilk	871	871	-0.0289628	0.569582	-0.0312721	0.0207252	0.131714	0.857665	Porridge_ready_Fish_fried_Chocolatemilk	143.392	219.602	215.737	2328.1	0.0185477	-0.0349556	-1.88463	0.0594794	0.593169	NS	NS	NS
S5_Streptococcus, Bifidobacterium dentium	Porridge_ready_Fish_fried_Chocolatemilk	205	205	0.0773975	0.762121	0.0271703	0.0385272	0.481552	0.892969	Porridge_ready_Fish_fried_Chocolatemilk	126	126	0.129518	0.829902	0.0277721	0.0508914	0.586378	0.850248	Porridge_ready_Fish_fried_Chocolatemilk	223	223	-0.0295003	0.594099	0.0150592	0.0206167	0.466023	0.786947	Porridge_ready_Fish_fried_Chocolatemilk	871	871	-0.0289628	0.569582	0.0118874	0.0130043	0.36093	0.857665	Porridge_ready_Fish_fried_Chocolatemilk	673.699	386.111	2352.66	5913.23	0.0103552	0.0144493	1.39536	0.162906	0.593169	NS	NS	NS
S7_Alistipes, Bacteroides	Porridge_ready_Fish_fried_Chocolatemilk	205	205	0.0773975	0.762121	0.0327031	0.044161	0.459844	0.892969	Porridge_ready_Fish_fried_Chocolatemilk	126	126	0.129518	0.829902	-0.0150177	0.0443693	0.7356	0.927165	Porridge_ready_Fish_fried_Chocolatemilk	223	223	-0.0295003	0.594099	-0.0206647	0.0440193	0.639223	0.864192	Porridge_ready_Fish_fried_Chocolatemilk	871	871	-0.0289628	0.569582	-0.0408239	0.0229585	0.0757286	0.755971	Porridge_ready_Fish_fried_Chocolatemilk	512.77	507.966	516.075	1897.2	0.0170647	-0.0229979	-1.34769	0.17776	0.593169	NS	NS	NS
S11_Bacteroides faecis	Icecream_Beer_non-alcoholic	205	205	-0.119788	0.542039	0.242663	0.13355	0.0707198	0.512719	Icecream_Beer_non-alcoholic	126	126	-0.0410161	0.57799	0.274898	0.204072	0.180498	0.808028	Icecream_Beer_non-alcoholic	223	223	-0.0245111	0.517043	0.0223424	0.136103	0.86976	0.995352	Icecream_Beer_non-alcoholic	871	871	0.0407092	0.884625	0.0240598	0.0363221	0.50789	0.883459	Icecream_Beer_non-alcoholic	56.0672	24.0122	53.9837	757.982	0.0334816	0.0444477	1.32753	0.184335	0.593967	NS	NS	NS
S10_Bacteroides eggerthii	Sweetened_tea_yoghurtdrink	205	205	0.111425	1.12755	0.254435	0.0798486	0.0016724	0.014249	Sweetened_tea_yoghurtdrink	126	126	0.0674218	0.540567	-0.414445	0.248846	0.0984282	0.475736	Sweetened_tea_yoghurtdrink	223	223	0.00250442	0.480442	-0.082794	0.10819	0.444945	0.806662	Sweetened_tea_yoghurtdrink	871	871	-0.0373747	0.434722	-0.0225988	0.0713238	0.751435	0.901398	Sweetened_tea_yoghurtdrink	156.843	16.1487	85.433	196.576	0.0468807	0.0476875	1.01721	0.309053	0.597503	NS	NS	NS
S2_Bifidobacterium animalis	Sweetened_tea_yoghurtdrink	205	205	0.111425	1.12755	0.0354305	0.0345289	0.306085	0.739706	Sweetened_tea_yoghurtdrink	126	126	0.0674218	0.540567	0.140924	0.21045	0.50438	0.768655	Sweetened_tea_yoghurtdrink	223	223	0.00250442	0.480442	0.163735	0.186582	0.381159	0.806662	Sweetened_tea_yoghurtdrink	871	871	-0.0373747	0.434722	-0.0214884	0.0758687	0.777067	0.901398	Sweetened_tea_yoghurtdrink	838.754	22.5788	28.7249	173.73	0.03066	0.0318385	1.03844	0.299066	0.597503	NS	NS	NS
S24_Ruminococcus S24_Ruminococcus gnavus, Lachnospiraceae bacterium 1 1 57FAA, Lachnospiraceae bacterium	Sweetened_tea_yoghurtdrink	205	205	0.111425	1.12755	0.0559496	0.0774578	0.470952	0.910507	Sweetened_tea_yoghurtdrink	126	126	0.0674218	0.540567	0.16074	0.116555	0.170521	0.618139	Sweetened_tea_yoghurtdrink	223	223	0.00250442	0.480442	-0.0451932	0.0415911	0.27848	0.734174	Sweetened_tea_yoghurtdrink	871	871	-0.0373747	0.434722	0.0302871	0.0234686	0.19722	0.817056	Sweetened_tea_yoghurtdrink	166.675	73.61	578.094	1815.62	0.0194846	0.0189907	0.974648	0.329735	0.597644	NS	NS	NS
S19_Streptococci, L. sakei	Meat	205	205	0.0153272	0.592254	0.0573941	0.042755	0.181104	0.814157	Meat	126	126	0.00509592	0.600788	0.103295	0.0796922	0.197558	0.809849	Meat	223	223	-0.0138947	0.560121	0.0572483	0.0627988	0.363017	0.751964	Meat	871	871	-0.0016754	0.624155	0.0126301	0.0246013	0.607814	0.927716	Meat	547.05	157.459	253.57	1652.28	0.0195727	0.0318144	1.62545	0.104066	0.603585	NS	NS	NS
S21_Clostridium bolteae, Coprobacillus	Spreads_sweet	205	205	-0.0555374	0.536875	0.146198	0.125555	0.245671	0.633855	Spreads_sweet	126	126	0.0129582	0.465282	-0.0375354	0.0700391	0.593116	0.978735	Spreads_sweet	223	223	-0.0241369	0.470388	-0.00746086	0.0405049	0.854047	0.91731	Spreads_sweet	871	871	0.0180257	0.519839	-0.0143496	0.0150728	0.341363	0.537725	Spreads_sweet	63.4356	203.854	609.514	4401.63	0.0137641	-0.0125202	-0.909626	0.36302	0.61272	NS	NS	NS
S3_Faecalibacterium_prausnitzii_Bifidobacterium_bifidum	Spreads_sweet	205	205	-0.0555374	0.536875	-0.0906983	0.0992646	0.361984	0.699837	Spreads_sweet	126	126	0.0129582	0.465282	0.0309654	0.204062	0.879645	0.978735	Spreads_sweet	223	223	-0.0241369	0.470388	0.232407	0.0979596	0.0185509	0.179326	Spreads_sweet	871	871	0.0180257	0.519839	0.015876	0.045113	0.724987	0.80864	Spreads_sweet	101.487	24.0145	104.209	491.356	0.0372402	0.0326719	0.877328	0.380309	0.61272	NS	NS	NS
S24_Ruminococcus S24_Ruminococcus gnavus, Lachnospiraceae bacterium 1 1 57FAA, Lachnospiraceae bacterium	Savoury_snacks	205	205	-0.0114351	0.501597	0.117265	0.171509	0.494952	0.976642	Savoury_snacks	126	126	0.0331572	0.582506	-0.0995327	0.103434	0.33791	0.816348	Savoury_snacks	223	223	-0.010086	0.411775	0.0478469	0.0496047	0.335894	0.613312	Savoury_snacks	871	871	0.000932337	0.495994	0.0231606	0.0212653	0.276411	0.688187	Savoury_snacks	33.9957	93.4699	406.401	2211.35	0.0190859	0.023803	1.24715	0.212341	0.615788	NS	NS	NS
S18_Lactobacillus delbrueckii	Coffee_milk_Soup	205	205	-0.0190486	0.599621	-0.167731	0.210201	0.425848	0.80099	Coffee_milk_Soup	126	126	0.00261508	0.755444	0.705113	0.121646	5.58728e-08	1.62031e-06	Coffee_milk_Soup	223	223	-0.00397076	0.684592	0.111768	0.0817098	0.172769	0.735351	Coffee_milk_Soup	871	871	0.00528062	0.524601	-0.0667071	0.0530971	0.209338	0.674534	Coffee_milk_Soup	22.6324	67.5778	149.779	354.698	0.0410068	0.0621057	1.51452	0.129893	0.624717	NS	NS	NS
S4_Bifidobacterium_catenulatum	Coffee_milk_Soup	205	205	-0.0190486	0.599621	-0.0275493	0.143813	0.84828	0.895957	Coffee_milk_Soup	126	126	0.00261508	0.755444	-0.0180886	0.0797469	0.820945	0.953261	Coffee_milk_Soup	223	223	-0.00397076	0.684592	0.185213	0.0936915	0.0493266	0.476824	Coffee_milk_Soup	871	871	0.00528062	0.524601	0.0398191	0.0362477	0.272298	0.717878	Coffee_milk_Soup	48.3505	157.243	113.92	761.096	0.0304204	0.0437061	1.43673	0.150794	0.624717	NS	NS	NS
S16_Propionate/succinate producers	Vegetables_Fruit_Tea	205	205	-0.11222	0.77642	0.0287243	0.0358616	0.424156	0.82677	Vegetables_Fruit_Tea	126	126	-0.000156026	0.675955	-0.00546298	0.0885064	0.950885	0.950885	Vegetables_Fruit_Tea	223	223	0.0418139	0.681131	0.027455	0.0581313	0.637201	0.958588	Vegetables_Fruit_Tea	871	871	0.0161285	0.690431	0.0145734	0.034355	0.671525	0.756174	Vegetables_Fruit_Tea	777.573	127.659	295.924	847.269	0.0220948	0.0205573	0.930413	0.352157	0.628256	NS	NS	NS
S24_Ruminococcus S24_Ruminococcus gnavus, Lachnospiraceae bacterium 1 1 57FAA, Lachnospiraceae bacterium	Vegetables_Fruit_Tea	205	205	-0.11222	0.77642	0.0764733	0.107463	0.477538	0.82677	Vegetables_Fruit_Tea	126	126	-0.000156026	0.675955	-0.0780709	0.0906316	0.39079	0.708306	Vegetables_Fruit_Tea	223	223	0.0418139	0.681131	-0.033546	0.0294114	0.25537	0.813179	Vegetables_Fruit_Tea	871	871	0.0161285	0.690431	-0.00604076	0.0145417	0.677949	0.756174	Vegetables_Fruit_Tea	86.5931	121.742	1156.03	4728.99	0.0128107	-0.0115256	-0.899684	0.368288	0.628256	NS	NS	NS
S29_Sutterella wadsworthensis	Pastry_Sweets	205	205	-0.0467602	0.641192	0.111801	0.110457	0.312753	0.647846	Pastry_Sweets	126	126	0.0864701	0.764689	0.0191123	0.101789	0.851415	0.985666	Pastry_Sweets	223	223	0.04413	0.575045	0.0878767	0.077701	0.25932	0.843631	Pastry_Sweets	871	871	-0.0122277	0.629675	0.0256951	0.0219217	0.241486	0.690133	Pastry_Sweets	81.9624	96.5151	165.633	2080.91	0.0203069	0.0325905	1.6049	0.108516	0.629391	NS	NS	NS
S25_Lachnospiraceae bacterium 3 1 57FAA	Bread_Legumes	205	205	-0.0736819	0.691941	-0.15642	0.126407	0.217385	0.65795	Bread_Legumes	126	126	0.0277121	0.583927	-0.143084	0.118472	0.229523	0.579322	Bread_Legumes	223	223	-0.116311	0.444079	0.00666433	0.11158	0.952428	0.952428	Bread_Legumes	871	871	0.0435099	0.579569	-0.0166717	0.0719355	0.81678	0.916912	Bread_Legumes	62.5832	71.2468	80.3203	193.247	0.049544	-0.0556459	-1.12316	0.261369	0.631642	NS	NS	NS
S15_Parabacteroides johnsonii	Dairy_Lean_beef	205	205	-0.201195	0.55624	0.530651	0.194041	0.00680678	0.197397	Dairy_Lean_beef	126	126	-0.146976	0.56817	0.0239616	0.18482	0.897062	0.947445	Dairy_Lean_beef	223	223	0.0254258	0.537627	-0.0393645	0.0998344	0.693748	0.921403	Dairy_Lean_beef	871	871	0.0612162	0.608226	-0.0809767	0.0509531	0.112372	0.325879	Dairy_Lean_beef	26.5589	29.2754	100.332	385.175	0.0429798	-0.037582	-0.874411	0.381894	0.633047	NS	NS	NS
S29_Sutterella wadsworthensis	Dairy_Lean_beef	205	205	-0.201195	0.55624	0.0197833	0.117217	0.866154	0.966095	Dairy_Lean_beef	126	126	-0.146976	0.56817	-0.0801847	0.0968263	0.409424	0.924779	Dairy_Lean_beef	223	223	0.0254258	0.537627	-0.0510744	0.0791854	0.51961	0.850788	Dairy_Lean_beef	871	871	0.0612162	0.608226	-0.0120695	0.0199145	0.544637	0.78833	Dairy_Lean_beef	72.7809	106.663	159.481	2521.52	0.0186975	-0.0159737	-0.854324	0.392926	0.633047	NS	NS	NS
S4_Bifidobacterium_catenulatum	Fruit_Juice_Milk	205	205	0.0499406	0.971662	0.142112	0.0833327	0.0896888	0.677861	Fruit_Juice_Milk	126	126	0.0470696	0.883709	-0.0430586	0.0800042	0.591433	0.986097	Fruit_Juice_Milk	223	223	-0.0460608	0.585582	-0.249634	0.112631	0.0277036	0.341842	Fruit_Juice_Milk	871	871	-0.00752221	0.66348	-0.035589	0.0301167	0.237667	0.601738	Fruit_Juice_Milk	144.002	156.234	78.828	1102.52	0.0259799	-0.0304934	-1.17373	0.240502	0.634051	NS	NS	NS
S29_Sutterella wadsworthensis	Savoury_snacks	205	205	-0.0114351	0.501597	0.0287677	0.128765	0.823456	0.976642	Savoury_snacks	126	126	0.0331572	0.582506	-0.0333837	0.0970121	0.731426	0.848454	Savoury_snacks	223	223	-0.010086	0.411775	-0.0714781	0.0994965	0.473285	0.623876	Savoury_snacks	871	871	0.000932337	0.495994	-0.0269922	0.0259879	0.299278	0.688187	Savoury_snacks	60.3121	106.255	101.015	1480.67	0.0239165	-0.0280274	-1.17188	0.241244	0.636006	NS	NS	NS
S17_Alistipes	Porridge_ready_Fish_fried_Chocolatemilk	205	205	0.0773975	0.762121	-0.0511124	0.1433	0.721709	0.892969	Porridge_ready_Fish_fried_Chocolatemilk	126	126	0.129518	0.829902	-0.0907959	0.120288	0.451835	0.770777	Porridge_ready_Fish_fried_Chocolatemilk	223	223	-0.0295003	0.594099	-0.0736677	0.100981	0.466469	0.786947	Porridge_ready_Fish_fried_Chocolatemilk	871	871	-0.0289628	0.569582	-0.0369671	0.0517372	0.4751	0.86112	Porridge_ready_Fish_fried_Chocolatemilk	48.6975	69.1124	98.0669	373.589	0.041188	-0.0505526	-1.22736	0.219686	0.63709	NS	NS	NS
S11_Bacteroides faecis	Ready_meals	205	205	-0.0761095	0.668047	0.078956	0.114576	0.491555	0.826175	Ready_meals	126	126	-0.0726462	0.963861	0.141759	0.130073	0.277968	0.982067	Ready_meals	223	223	0.0593805	0.744316	0.0777156	0.0949886	0.414165	0.993664	Ready_meals	871	871	0.0135936	0.640699	0.00562612	0.0529746	0.915445	0.96952	Ready_meals	76.1747	59.1053	110.83	356.34	0.0407417	0.0415157	1.019	0.308204	0.638423	NS	NS	NS
S29_Sutterella wadsworthensis	Ready_meals	205	205	-0.0761095	0.668047	0.0798527	0.0975883	0.414238	0.800861	Ready_meals	126	126	-0.0726462	0.963861	0.169092	0.0582812	0.00450429	0.130624	Ready_meals	223	223	0.0593805	0.744316	-0.0785194	0.0539777	0.147207	0.993664	Ready_meals	871	871	0.0135936	0.640699	-0.0356607	0.0197409	0.0712178	0.413063	Ready_meals	105.004	294.403	343.218	2566.06	0.0173849	-0.018222	-1.04815	0.294568	0.638423	NS	NS	NS
S3_Faecalibacterium_prausnitzii_Bifidobacterium_bifidum	Ready_meals	205	205	-0.0761095	0.668047	0.0313273	0.0787922	0.691358	0.826175	Ready_meals	126	126	-0.0726462	0.963861	0.117127	0.0992501	0.240308	0.982067	Ready_meals	223	223	0.0593805	0.744316	0.0136081	0.0588411	0.817326	0.993664	Ready_meals	871	871	0.0135936	0.640699	0.025855	0.0376857	0.492854	0.932539	Ready_meals	161.077	101.517	288.827	704.121	0.0282218	0.0311195	1.10268	0.270167	0.638423	NS	NS	NS
S12_Bacteroides finegoldii	Eggs_Alcoholic_drinks	205	205	-0.104303	0.43925	-0.125595	0.229471	0.584771	0.706598	Eggs_Alcoholic_drinks	126	126	-0.134042	0.302491	-0.459112	0.389539	0.240888	0.776195	Eggs_Alcoholic_drinks	223	223	-0.0546888	0.448173	0.12186	0.143344	0.396195	0.756933	Eggs_Alcoholic_drinks	871	871	0.0583724	0.606478	0.0612364	0.0535877	0.253466	0.668229	Eggs_Alcoholic_drinks	18.9908	6.59019	48.6676	348.233	0.0486515	0.0517049	1.06276	0.28789	0.642217	NS	NS	NS
S2_Bifidobacterium animalis	Eggs_Alcoholic_drinks	205	205	-0.104303	0.43925	0.0156346	0.0868738	0.85736	0.920868	Eggs_Alcoholic_drinks	126	126	-0.134042	0.302491	0.0651011	0.393036	0.868722	0.986032	Eggs_Alcoholic_drinks	223	223	-0.0546888	0.448173	-0.225006	0.199463	0.260541	0.756933	Eggs_Alcoholic_drinks	871	871	0.0583724	0.606478	-0.0737076	0.0588429	0.210684	0.668229	Eggs_Alcoholic_drinks	132.502	6.47343	25.1348	288.81	0.0469882	-0.0539828	-1.14886	0.250614	0.642217	NS	NS	NS
S22_Mucin degraders	Eggs_Alcoholic_drinks	205	205	-0.104303	0.43925	-0.0174131	0.0683998	0.799315	0.891543	Eggs_Alcoholic_drinks	126	126	-0.134042	0.302491	0.021454	0.155319	0.890372	0.986032	Eggs_Alcoholic_drinks	223	223	-0.0546888	0.448173	0.122275	0.0804913	0.130224	0.577779	Eggs_Alcoholic_drinks	871	871	0.0583724	0.606478	-0.0611552	0.0295159	0.0385687	0.279623	Eggs_Alcoholic_drinks	213.743	41.4526	154.348	1147.86	0.0253396	-0.034774	-1.37232	0.169964	0.642217	NS	NS	NS
S27_Turicibacter_sanguinis	Eggs_Alcoholic_drinks	205	205	-0.104303	0.43925	0.052088	0.0687065	0.449275	0.706598	Eggs_Alcoholic_drinks	126	126	-0.134042	0.302491	0.0430896	0.308654	0.889206	0.986032	Eggs_Alcoholic_drinks	223	223	-0.0546888	0.448173	-0.0259585	0.0338181	0.443719	0.756933	Eggs_Alcoholic_drinks	871	871	0.0583724	0.606478	-0.054285	0.0384231	0.15809	0.654942	Eggs_Alcoholic_drinks	211.838	10.4968	874.381	677.355	0.0237418	-0.0270459	-1.13916	0.254634	0.642217	NS	NS	NS
S3_Faecalibacterium_prausnitzii_Bifidobacterium_bifidum	Eggs_Alcoholic_drinks	205	205	-0.104303	0.43925	0.0492	0.119379	0.680687	0.789597	Eggs_Alcoholic_drinks	126	126	-0.134042	0.302491	0.0985602	0.322162	0.76019	0.986032	Eggs_Alcoholic_drinks	223	223	-0.0546888	0.448173	-0.0959038	0.0969589	0.323717	0.756933	Eggs_Alcoholic_drinks	871	871	0.0583724	0.606478	0.0595903	0.0407997	0.1445	0.654942	Eggs_Alcoholic_drinks	70.1691	9.63501	106.371	600.741	0.035648	0.0381221	1.0694	0.284889	0.642217	NS	NS	NS
S4_Bifidobacterium_catenulatum	Eggs_Alcoholic_drinks	205	205	-0.104303	0.43925	-0.022263	0.188595	0.90615	0.938512	Eggs_Alcoholic_drinks	126	126	-0.134042	0.302491	0.019484	0.209963	0.926219	0.986032	Eggs_Alcoholic_drinks	223	223	-0.0546888	0.448173	-0.100484	0.143845	0.485576	0.782316	Eggs_Alcoholic_drinks	871	871	0.0583724	0.606478	-0.0343648	0.0336891	0.308004	0.744342	Eggs_Alcoholic_drinks	28.1152	22.6838	48.3295	881.094	0.0319402	-0.0360315	-1.12809	0.259281	0.642217	NS	NS	NS
S5_Streptococcus, Bifidobacterium dentium	Eggs_Alcoholic_drinks	205	205	-0.104303	0.43925	0.0649886	0.0685516	0.344347	0.706598	Eggs_Alcoholic_drinks	126	126	-0.134042	0.302491	-0.0124627	0.135948	0.927126	0.986032	Eggs_Alcoholic_drinks	223	223	-0.0546888	0.448173	-0.0398043	0.0268222	0.139464	0.577779	Eggs_Alcoholic_drinks	871	871	0.0583724	0.606478	-0.00977502	0.0126665	0.440502	0.777288	Eggs_Alcoholic_drinks	212.796	54.1069	1389.99	6232.88	0.0112582	-0.0130674	-1.16071	0.245761	0.642217	NS	NS	NS
28_Haemophilus, Veillonella	Fastfood	205	205	0.059247	0.613728	0.0109149	0.0633105	0.863328	0.927278	Fastfood	126	126	0.0181697	0.719587	0.0273026	0.0579539	0.638531	0.996213	Fastfood	223	223	-0.0641103	0.381483	0.0565269	0.0455841	0.216415	0.467502	Fastfood	871	871	8.79047e-06	0.532809	-0.0525293	0.0237929	0.0275361	0.330433	Fastfood	249.487	297.738	481.252	1766.46	0.0189153	-0.0195837	-1.03533	0.300513	0.643135	NS	NS	NS
S13_Escherichia coli, Bacteroides fragilis	Fastfood	205	205	0.059247	0.613728	-0.0670785	0.118325	0.571448	0.744536	Fastfood	126	126	0.0181697	0.719587	-0.00184145	0.100459	0.985407	0.996213	Fastfood	223	223	-0.0641103	0.381483	-0.0838696	0.0720985	0.246049	0.467502	Fastfood	871	871	8.79047e-06	0.532809	0.0594465	0.0308845	0.0545859	0.330433	Fastfood	71.4242	99.088	192.374	1048.38	0.0266192	0.0292041	1.09711	0.272595	0.643135	NS	NS	NS
S22_Mucin degraders	Fastfood	205	205	0.059247	0.613728	-0.0845816	0.0726408	0.245678	0.744536	Fastfood	126	126	0.0181697	0.719587	-0.104748	0.105001	0.320501	0.988999	Fastfood	223	223	-0.0641103	0.381483	-0.0489443	0.123922	0.693269	0.818235	Fastfood	871	871	8.79047e-06	0.532809	-0.000973347	0.0455088	0.982941	0.982941	Fastfood	189.513	90.7018	65.1181	482.846	0.0347486	-0.0352427	-1.01422	0.310479	0.643135	NS	NS	NS
S8_Eggerthella lenta, Gordonibacter pamelaeae	Vegetables_Fruit_Tea	205	205	-0.11222	0.77642	-0.0434163	0.0803687	0.58966	0.82677	Vegetables_Fruit_Tea	126	126	-0.000156026	0.675955	0.0346293	0.101219	0.732878	0.885561	Vegetables_Fruit_Tea	223	223	0.0418139	0.681131	-0.0557796	0.0579052	0.336488	0.813179	Vegetables_Fruit_Tea	871	871	0.0161285	0.690431	-0.0123118	0.0280569	0.660907	0.756174	Vegetables_Fruit_Tea	154.82	97.6055	298.239	1270.35	0.0234339	-0.0195592	-0.834657	0.403911	0.650745	NS	NS	NS
S2_Bifidobacterium animalis	Sugar_Sweets	205	205	0.184389	1.11711	-0.0258476	0.0381726	0.499114	0.93287	Sugar_Sweets	126	126	0.0308263	0.62208	-0.181615	0.180158	0.315441	0.703677	Sugar_Sweets	223	223	-0.0900997	0.489801	-0.239118	0.20168	0.237065	0.506409	Sugar_Sweets	871	871	-0.0242716	0.577625	-0.00617047	0.0615343	0.920148	0.97542	Sugar_Sweets	686.272	30.8102	24.5852	264.098	0.031532	-0.0306656	-0.972524	0.33079	0.659975	NS	NS	NS
S4_Bifidobacterium_catenulatum	Sugar_Sweets	205	205	0.184389	1.11711	-0.0331919	0.0829273	0.6894	0.93287	Sugar_Sweets	126	126	0.0308263	0.62208	-0.0366191	0.0965827	0.705248	0.928307	Sugar_Sweets	223	223	-0.0900997	0.489801	0.309756	0.144126	0.0327244	0.135573	Sugar_Sweets	871	871	-0.0242716	0.577625	-0.046191	0.0348312	0.185164	0.879516	Sugar_Sweets	145.414	107.202	48.1414	824.259	0.029814	-0.0283671	-0.951469	0.341366	0.659975	NS	NS	NS
S22_Mucin degraders	Wine_Alcohol	205	205	-0.27214	0.559289	0.0496032	0.0523896	0.344894	0.755952	Wine_Alcohol	126	126	-0.21131	0.583969	0.051534	0.0771991	0.505716	0.87106	Wine_Alcohol	223	223	-0.0117566	0.664384	0.130382	0.0532233	0.0151078	0.146042	Wine_Alcohol	871	871	0.0981863	0.783786	-0.00841953	0.0208982	0.687135	0.830288	Wine_Alcohol	364.342	167.794	353.017	2289.71	0.0177475	0.0168412	0.948933	0.342655	0.662466	NS	NS	NS
S10_Bacteroides eggerthii	Fish_Nuts	205	205	-0.135461	0.55016	0.237563	0.158499	0.135504	0.785922	Fish_Nuts	126	126	0.0141888	0.575752	0.24195	0.231021	0.297065	0.810424	Fish_Nuts	223	223	0.0520077	0.656703	0.00987354	0.07911	0.900791	0.932962	Fish_Nuts	871	871	0.0168252	0.570004	0.0303205	0.0548874	0.580809	0.953867	Fish_Nuts	39.8056	18.7368	159.786	331.936	0.0426299	0.0465809	1.09268	0.274534	0.663456	NS	NS	NS
S23_B. hydrogenotrophica	Savoury_snacks	205	205	-0.0114351	0.501597	0.0778743	0.194423	0.689188	0.976642	Savoury_snacks	126	126	0.0331572	0.582506	-0.316229	0.249358	0.207192	0.751069	Savoury_snacks	223	223	-0.010086	0.411775	0.180611	0.165194	0.275462	0.613312	Savoury_snacks	871	871	0.000932337	0.495994	0.0531692	0.0557225	0.34026	0.688187	Savoury_snacks	26.4548	16.0825	36.6449	322.061	0.0499225	0.0516311	1.03422	0.301031	0.671531	NS	NS	NS
S27_Turicibacter_sanguinis	Savoury_snacks	205	205	-0.0114351	0.501597	0.0085177	0.0596647	0.886625	0.976642	Savoury_snacks	126	126	0.0331572	0.582506	0.121078	0.155321	0.4372	0.816348	Savoury_snacks	223	223	-0.010086	0.411775	-0.0359334	0.0322268	0.266305	0.613312	Savoury_snacks	871	871	0.000932337	0.495994	-0.0363596	0.0457348	0.426839	0.728138	Savoury_snacks	280.909	41.4514	962.867	478.087	0.0238142	-0.0252766	-1.06141	0.288503	0.671531	NS	NS	NS
S13_Escherichia coli, Bacteroides fragilis	Meat	205	205	0.0153272	0.592254	-0.124884	0.0844022	0.14062	0.814157	Meat	126	126	0.00509592	0.600788	-0.0815862	0.0725651	0.2632	0.809849	Meat	223	223	-0.0138947	0.560121	0.0265916	0.0389397	0.495432	0.802091	Meat	871	871	-0.0016754	0.624155	0.0391402	0.0192949	0.0428162	0.41389	Meat	140.376	189.908	659.498	2686.07	0.0164938	0.0243877	1.4786	0.139247	0.673029	NS	NS	NS
28_Haemophilus, Veillonella	Icecream_Beer_non-alcoholic	205	205	-0.119788	0.542039	0.00353019	0.0508503	0.944735	0.978476	Icecream_Beer_non-alcoholic	126	126	-0.0410161	0.57799	-0.0456978	0.0403644	0.260134	0.808028	Icecream_Beer_non-alcoholic	223	223	-0.0245111	0.517043	-0.00367594	0.0269319	0.891572	0.995352	Icecream_Beer_non-alcoholic	871	871	0.0407092	0.884625	-0.00869507	0.0096716	0.3689	0.883459	Icecream_Beer_non-alcoholic	386.735	613.767	1378.69	10690.6	0.00874712	-0.00954155	-1.09082	0.275351	0.674578	NS	NS	NS
S2_Bifidobacterium animalis	Icecream_Beer_non-alcoholic	205	205	-0.119788	0.542039	-0.0672698	0.0671395	0.317589	0.753652	Icecream_Beer_non-alcoholic	126	126	-0.0410161	0.57799	-0.156049	0.190627	0.414631	0.858879	Icecream_Beer_non-alcoholic	223	223	-0.0245111	0.517043	-0.0039618	0.17349	0.981802	0.995352	Icecream_Beer_non-alcoholic	871	871	0.0407092	0.884625	-0.0207233	0.0372793	0.578428	0.883459	Icecream_Beer_non-alcoholic	221.842	27.5189	33.2238	719.555	0.031589	-0.0341876	-1.08226	0.279136	0.674578	NS	NS	NS
S8_Eggerthella lenta, Gordonibacter pamelaeae	Icecream_Beer_non-alcoholic	205	205	-0.119788	0.542039	0.119743	0.11296	0.29042	0.753652	Icecream_Beer_non-alcoholic	126	126	-0.0410161	0.57799	-0.0912248	0.111185	0.413627	0.858879	Icecream_Beer_non-alcoholic	223	223	-0.0245111	0.517043	0.000434633	0.0745266	0.995352	0.995352	Icecream_Beer_non-alcoholic	871	871	0.0407092	0.884625	0.0255674	0.021574	0.236308	0.856616	Icecream_Beer_non-alcoholic	78.37	80.8924	180.044	2148.52	0.0200489	0.0229177	1.14309	0.253	0.674578	NS	NS	NS
S17_Alistipes	Meat_Potatoes_Gravy	205	205	0.0092388	0.66643	-0.373923	0.189175	0.0494681	0.358644	Meat_Potatoes_Gravy	126	126	0.0317397	0.612627	0.00968437	0.189022	0.959224	0.96868	Meat_Potatoes_Gravy	223	223	-0.12186	0.546907	-0.140251	0.128183	0.275104	0.664834	Meat_Potatoes_Gravy	871	871	0.0247565	0.537179	0.0150589	0.0623829	0.809307	0.937995	Meat_Potatoes_Gravy	27.943	27.9882	60.861	256.962	0.0517258	-0.0397153	-0.767805	0.442603	0.675552	NS	NS	NS
S1_Acetate/butyrate producers	Fruit_Juice_Milk	205	205	0.0499406	0.971662	0.00698766	0.038573	0.856431	0.973185	Fruit_Juice_Milk	126	126	0.0470696	0.883709	-0.0069798	0.0372393	0.851647	0.986097	Fruit_Juice_Milk	223	223	-0.0460608	0.585582	-0.00827594	0.0306392	0.787334	0.969155	Fruit_Juice_Milk	871	871	-0.00752221	0.66348	-0.0142521	0.0123547	0.248995	0.601738	Fruit_Juice_Milk	672.1	721.102	1065.24	6551.42	0.0105352	-0.0113791	-1.08011	0.280095	0.676895	NS	NS	NS
S16_Propionate/succinate producers	Wine_Alcohol	205	205	-0.27214	0.559289	0.00394492	0.0522648	0.939914	0.939914	Wine_Alcohol	126	126	-0.21131	0.583969	-0.00713098	0.0955847	0.940654	0.940654	Wine_Alcohol	223	223	-0.0117566	0.664384	-0.0536111	0.057364	0.351064	0.880426	Wine_Alcohol	871	871	0.0981863	0.783786	0.0482439	0.0298802	0.10677	0.398282	Wine_Alcohol	366.084	109.452	303.893	1120.03	0.0229448	0.0202196	0.881228	0.378195	0.685478	NS	NS	NS
S23_B. hydrogenotrophica	Porridge_ready_Fish_fried_Chocolatemilk	205	205	0.0773975	0.762121	0.0383061	0.125579	0.760658	0.892969	Porridge_ready_Fish_fried_Chocolatemilk	126	126	0.129518	0.829902	-0.176047	0.173727	0.312931	0.648214	Porridge_ready_Fish_fried_Chocolatemilk	223	223	-0.0295003	0.594099	0.0506591	0.113427	0.655594	0.864192	Porridge_ready_Fish_fried_Chocolatemilk	871	871	-0.0289628	0.569582	-0.0558412	0.0459497	0.224595	0.857665	Porridge_ready_Fish_fried_Chocolatemilk	63.4107	33.1333	77.7255	473.626	0.0392869	-0.0399977	-1.01809	0.308634	0.688491	NS	NS	NS
S24_Ruminococcus S24_Ruminococcus gnavus, Lachnospiraceae bacterium 1 1 57FAA, Lachnospiraceae bacterium	Porridge_ready_Fish_fried_Chocolatemilk	205	205	0.0773975	0.762121	0.115524	0.108668	0.289046	0.892969	Porridge_ready_Fish_fried_Chocolatemilk	126	126	0.129518	0.829902	0.0331667	0.071902	0.645464	0.870273	Porridge_ready_Fish_fried_Chocolatemilk	223	223	-0.0295003	0.594099	0.00760834	0.0337971	0.822111	0.883008	Porridge_ready_Fish_fried_Chocolatemilk	871	871	-0.0289628	0.569582	0.0139251	0.0175581	0.427949	0.857665	Porridge_ready_Fish_fried_Chocolatemilk	84.6825	193.427	875.468	3243.74	0.0150802	0.0154705	1.02588	0.304947	0.688491	NS	NS	NS
S9_Bacteroides, Roseburia	Porridge_ready_Fish_fried_Chocolatemilk	205	205	0.0773975	0.762121	0.00393747	0.0345422	0.909361	0.909361	Porridge_ready_Fish_fried_Chocolatemilk	126	126	0.129518	0.829902	-0.0182868	0.0414928	0.660207	0.870273	Porridge_ready_Fish_fried_Chocolatemilk	223	223	-0.0295003	0.594099	0.0505706	0.0411546	0.220479	0.786947	Porridge_ready_Fish_fried_Chocolatemilk	871	871	-0.0289628	0.569582	-0.0328165	0.0186109	0.0782039	0.755971	Porridge_ready_Fish_fried_Chocolatemilk	838.11	580.837	590.422	2887.12	0.0142908	-0.0147471	-1.03192	0.302108	0.688491	NS	NS	NS
S16_Propionate/succinate producers	Meat	205	205	0.0153272	0.592254	-0.051269	0.0466097	0.272754	0.814157	Meat	126	126	0.00509592	0.600788	-0.00505288	0.0958052	0.958026	0.958865	Meat	223	223	-0.0138947	0.560121	-0.00650496	0.0718072	0.927904	0.956785	Meat	871	871	-0.0016754	0.624155	-0.0421785	0.0403625	0.296321	0.782022	Meat	460.307	108.949	193.938	613.824	0.0269482	-0.0372556	-1.38249	0.166821	0.691117	NS	NS	NS
S29_Sutterella wadsworthensis	Vegetables_Fruit_Tea	205	205	-0.11222	0.77642	0.174635	0.0818605	0.0341874	0.330478	Vegetables_Fruit_Tea	126	126	-0.000156026	0.675955	-0.161267	0.0890646	0.0729722	0.386482	Vegetables_Fruit_Tea	223	223	0.0418139	0.681131	0.0503171	0.0599198	0.401978	0.89672	Vegetables_Fruit_Tea	871	871	0.0161285	0.690431	0.00814104	0.017471	0.641358	0.756174	Vegetables_Fruit_Tea	149.228	126.064	278.522	3276.16	0.0161585	0.0121193	0.750023	0.453241	0.691789	NS	NS	NS
S5_Streptococcus, Bifidobacterium dentium	Meat_Potatoes_Gravy	205	205	0.0092388	0.66643	0.0724282	0.0518896	0.164435	0.748138	Meat_Potatoes_Gravy	126	126	0.0317397	0.612627	0.201015	0.0722729	0.00638037	0.0686856	Meat_Potatoes_Gravy	223	223	-0.12186	0.546907	-0.0315206	0.0263713	0.233475	0.615525	Meat_Potatoes_Gravy	871	871	0.0247565	0.537179	0.00704859	0.0155042	0.649501	0.909477	Meat_Potatoes_Gravy	371.397	191.447	1437.93	4160.09	0.0127403	0.0080154	0.629138	0.529259	0.697659	NS	NS	NS
S7_Alistipes, Bacteroides	Meat_Potatoes_Gravy	205	205	0.0092388	0.66643	-0.0421819	0.058854	0.474387	0.838075	Meat_Potatoes_Gravy	126	126	0.0317397	0.612627	-0.0666908	0.0693248	0.337981	0.515934	Meat_Potatoes_Gravy	223	223	-0.12186	0.546907	0.0263945	0.0559624	0.637652	0.822655	Meat_Potatoes_Gravy	871	871	0.0247565	0.537179	-0.010632	0.0277235	0.701441	0.909477	Meat_Potatoes_Gravy	288.7	208.076	319.307	1301.08	0.0217332	-0.0148595	-0.683723	0.49415	0.697659	NS	NS	NS
S9_Bacteroides, Roseburia	Meat_Potatoes_Gravy	205	205	0.0092388	0.66643	0.0144033	0.0460199	0.754626	0.841698	Meat_Potatoes_Gravy	126	126	0.0317397	0.612627	-0.0301916	0.0650431	0.643361	0.717595	Meat_Potatoes_Gravy	223	223	-0.12186	0.546907	-0.00905289	0.0524988	0.863252	0.927197	Meat_Potatoes_Gravy	871	871	0.0247565	0.537179	-0.016441	0.0224679	0.464514	0.909477	Meat_Potatoes_Gravy	472.182	236.373	362.828	1980.96	0.0181002	-0.0118562	-0.655032	0.512447	0.697659	NS	NS	NS
S3_Faecalibacterium_prausnitzii_Bifidobacterium_bifidum	Meat_Potatoes_Gravy	205	205	0.0092388	0.66643	0.0297644	0.0891782	0.738911	0.841698	Meat_Potatoes_Gravy	126	126	0.0317397	0.612627	-0.270754	0.180712	0.136713	0.448366	Meat_Potatoes_Gravy	223	223	-0.12186	0.546907	-0.00185823	0.0941921	0.984279	0.984279	Meat_Potatoes_Gravy	871	871	0.0247565	0.537179	0.0482436	0.0487804	0.322943	0.905245	Meat_Potatoes_Gravy	125.743	30.6215	112.712	420.251	0.0380879	0.02251	0.591	0.554521	0.699178	NS	NS	NS
S14_Odoribacter	Dairy_Lean_beef	205	205	-0.201195	0.55624	-0.0928545	0.0780377	0.23564	0.854193	Dairy_Lean_beef	126	126	-0.146976	0.56817	-0.329096	0.171268	0.0570374	0.827042	Dairy_Lean_beef	223	223	0.0254258	0.537627	0.0704145	0.0980951	0.473682	0.850788	Dairy_Lean_beef	871	871	0.0612162	0.608226	0.0132261	0.0465464	0.776364	0.856431	Dairy_Lean_beef	164.207	34.0915	103.921	461.559	0.036184	-0.0170789	-0.472002	0.636926	0.700618	NS	NS	NS
S16_Propionate/succinate producers	Dairy_Lean_beef	205	205	-0.201195	0.55624	0.0251611	0.0493726	0.610918	0.943996	Dairy_Lean_beef	126	126	-0.146976	0.56817	-0.0208452	0.100226	0.835595	0.947445	Dairy_Lean_beef	223	223	0.0254258	0.537627	-0.128071	0.0759481	0.0932027	0.33726	Dairy_Lean_beef	871	871	0.0612162	0.608226	0.0523543	0.0401382	0.192462	0.398672	Dairy_Lean_beef	410.231	99.5497	173.367	620.704	0.027694	0.0142194	0.513447	0.607639	0.700618	NS	NS	NS
S21_Clostridium bolteae, Coprobacillus	Dairy_Lean_beef	205	205	-0.201195	0.55624	-0.0292547	0.117562	0.803741	0.953515	Dairy_Lean_beef	126	126	-0.146976	0.56817	-0.0525148	0.0562727	0.352789	0.924779	Dairy_Lean_beef	223	223	0.0254258	0.537627	-0.00424195	0.0351284	0.904006	0.924253	Dairy_Lean_beef	871	871	0.0612162	0.608226	-0.00298807	0.0130057	0.818342	0.856431	Dairy_Lean_beef	72.3547	315.794	810.371	5912	0.011859	-0.00559785	-0.472032	0.636904	0.700618	NS	NS	NS
S24_Ruminococcus S24_Ruminococcus gnavus, Lachnospiraceae bacterium 1 1 57FAA, Lachnospiraceae bacterium	Dairy_Lean_beef	205	205	-0.201195	0.55624	-0.091205	0.153154	0.552185	0.943996	Dairy_Lean_beef	126	126	-0.146976	0.56817	-0.21467	0.10184	0.0371917	0.827042	Dairy_Lean_beef	223	223	0.0254258	0.537627	0.0647182	0.0394357	0.102301	0.33726	Dairy_Lean_beef	871	871	0.0612162	0.608226	0.00370874	0.0169262	0.826616	0.856431	Dairy_Lean_beef	42.6328	96.4189	643.015	3490.46	0.0152988	0.00701538	0.458558	0.646552	0.700618	NS	NS	NS
S25_Lachnospiraceae bacterium 3 1 57FAA	Dairy_Lean_beef	205	205	-0.201195	0.55624	-0.0591695	0.141809	0.676947	0.943996	Dairy_Lean_beef	126	126	-0.146976	0.56817	-0.0122994	0.114686	0.914774	0.947445	Dairy_Lean_beef	223	223	0.0254258	0.537627	0.0187976	0.0892388	0.833363	0.924253	Dairy_Lean_beef	871	871	0.0612162	0.608226	-0.0356257	0.0628316	0.570859	0.78833	Dairy_Lean_beef	49.727	76.0289	125.572	253.305	0.0445156	-0.0208887	-0.469245	0.638894	0.700618	NS	NS	NS
S26_Roseburia	Dairy_Lean_beef	205	205	-0.201195	0.55624	-0.0581525	0.13005	0.65526	0.943996	Dairy_Lean_beef	126	126	-0.146976	0.56817	0.161162	0.129961	0.217429	0.900777	Dairy_Lean_beef	223	223	0.0254258	0.537627	0.00921975	0.0583801	0.874681	0.924253	Dairy_Lean_beef	871	871	0.0612162	0.608226	-0.0407266	0.0422045	0.334831	0.606881	Dairy_Lean_beef	59.1257	59.207	293.407	561.412	0.032056	-0.0144435	-0.45057	0.6523	0.700618	NS	NS	NS
S27_Turicibacter_sanguinis	Dairy_Lean_beef	205	205	-0.201195	0.55624	0.0300975	0.0540555	0.578298	0.943996	Dairy_Lean_beef	126	126	-0.146976	0.56817	0.111804	0.154859	0.471715	0.924779	Dairy_Lean_beef	223	223	0.0254258	0.537627	-0.00237316	0.0249257	0.924253	0.924253	Dairy_Lean_beef	871	871	0.0612162	0.608226	-0.0533291	0.0371358	0.151371	0.384547	Dairy_Lean_beef	342.231	41.6991	1609.55	725.126	0.019179	-0.0101256	-0.527952	0.597532	0.700618	NS	NS	NS
S5_Streptococcus, Bifidobacterium dentium	Dairy_Lean_beef	205	205	-0.201195	0.55624	-0.0022425	0.0533574	0.966522	0.98249	Dairy_Lean_beef	126	126	-0.146976	0.56817	-0.0465673	0.0655755	0.479138	0.924779	Dairy_Lean_beef	223	223	0.0254258	0.537627	0.0140402	0.0237481	0.555079	0.850788	Dairy_Lean_beef	871	871	0.0612162	0.608226	-0.00966034	0.0123151	0.433017	0.66092	Dairy_Lean_beef	351.245	232.55	1773.14	6593.6	0.01057	-0.00563296	-0.532919	0.594089	0.700618	NS	NS	NS
S8_Eggerthella lenta, Gordonibacter pamelaeae	Dairy_Lean_beef	205	205	-0.201195	0.55624	0.229977	0.113702	0.0444637	0.557629	Dairy_Lean_beef	126	126	-0.146976	0.56817	0.0316911	0.117573	0.78799	0.947445	Dairy_Lean_beef	223	223	0.0254258	0.537627	0.0449343	0.0759322	0.55463	0.850788	Dairy_Lean_beef	871	871	0.0612162	0.608226	-0.00855352	0.0325006	0.792476	0.856431	Dairy_Lean_beef	77.35	72.3411	173.44	946.709	0.0280624	0.0155744	0.554991	0.578901	0.700618	NS	NS	NS
S9_Bacteroides, Roseburia	Wine_Alcohol	205	205	-0.27214	0.559289	0.0369277	0.0472885	0.435792	0.789874	Wine_Alcohol	126	126	-0.21131	0.583969	-0.0230544	0.0567431	0.685249	0.892704	Wine_Alcohol	223	223	-0.0117566	0.664384	-0.066926	0.0357882	0.062822	0.364972	Wine_Alcohol	871	871	0.0981863	0.783786	0.0198691	0.0132856	0.135137	0.435443	Wine_Alcohol	447.187	310.581	780.766	5665.53	0.0117818	0.00967077	0.820823	0.411747	0.702392	NS	NS	NS
28_Haemophilus, Veillonella	Eggs_Alcoholic_drinks	205	205	-0.104303	0.43925	-0.0447918	0.0613997	0.466705	0.706598	Eggs_Alcoholic_drinks	126	126	-0.134042	0.302491	0.186486	0.0858887	0.0321427	0.565836	Eggs_Alcoholic_drinks	223	223	-0.0546888	0.448173	-0.0125196	0.0298142	0.674998	0.888454	Eggs_Alcoholic_drinks	871	871	0.0583724	0.606478	-0.0134078	0.0154738	0.386477	0.777288	Eggs_Alcoholic_drinks	265.258	135.559	1125	4176.44	0.0132427	-0.00994046	-0.750636	0.452872	0.713252	NS	NS	NS
S13_Escherichia coli, Bacteroides fragilis	Eggs_Alcoholic_drinks	205	205	-0.104303	0.43925	-0.225538	0.113372	0.0480893	0.588135	Eggs_Alcoholic_drinks	126	126	-0.134042	0.302491	-0.237362	0.151743	0.120487	0.610996	Eggs_Alcoholic_drinks	223	223	-0.0546888	0.448173	0.00758813	0.0468176	0.871401	0.934008	Eggs_Alcoholic_drinks	871	871	0.0583724	0.606478	-0.00841243	0.0200728	0.675251	0.920717	Eggs_Alcoholic_drinks	77.8011	43.4292	456.227	2481.91	0.0180794	-0.014798	-0.8185	0.413072	0.713252	NS	NS	NS
S19_Streptococci, L. sakei	Eggs_Alcoholic_drinks	205	205	-0.104303	0.43925	-0.0384506	0.0576937	0.505942	0.706598	Eggs_Alcoholic_drinks	126	126	-0.134042	0.302491	0.152779	0.177334	0.390772	0.934549	Eggs_Alcoholic_drinks	223	223	-0.0546888	0.448173	0.0608355	0.0767626	0.428955	0.756933	Eggs_Alcoholic_drinks	871	871	0.0583724	0.606478	0.0193357	0.0259062	0.455652	0.777288	Eggs_Alcoholic_drinks	300.43	31.799	169.707	1490.02	0.0224058	0.0162862	0.726874	0.467303	0.713252	NS	NS	NS
S25_Lachnospiraceae bacterium 3 1 57FAA	Eggs_Alcoholic_drinks	205	205	-0.104303	0.43925	-0.22754	0.17972	0.206965	0.703885	Eggs_Alcoholic_drinks	126	126	-0.134042	0.302491	-0.160049	0.22765	0.483387	0.934549	Eggs_Alcoholic_drinks	223	223	-0.0546888	0.448173	-0.09713	0.10054	0.335078	0.756933	Eggs_Alcoholic_drinks	871	871	0.0583724	0.606478	0.00894009	0.0662118	0.892625	0.949578	Eggs_Alcoholic_drinks	30.9603	19.2959	98.9288	228.102	0.051483	-0.0469211	-0.911389	0.362091	0.713252	NS	NS	NS
S29_Sutterella wadsworthensis	Eggs_Alcoholic_drinks	205	205	-0.104303	0.43925	0.0891391	0.15078	0.5551	0.706598	Eggs_Alcoholic_drinks	126	126	-0.134042	0.302491	-0.0122272	0.202786	0.952031	0.986032	Eggs_Alcoholic_drinks	223	223	-0.0546888	0.448173	-0.0302864	0.0894579	0.735272	0.888454	Eggs_Alcoholic_drinks	871	871	0.0583724	0.606478	-0.0164259	0.0214844	0.444761	0.777288	Eggs_Alcoholic_drinks	43.9861	24.3179	124.958	2166.48	0.0205858	-0.0151488	-0.735886	0.4618	0.713252	NS	NS	NS
S6_Bifidobacterium_pseudocatenulatum	Eggs_Alcoholic_drinks	205	205	-0.104303	0.43925	-0.416781	0.221065	0.0608416	0.588135	Eggs_Alcoholic_drinks	126	126	-0.134042	0.302491	-0.0377274	0.407368	0.926366	0.986032	Eggs_Alcoholic_drinks	223	223	-0.0546888	0.448173	-0.0173246	0.140245	0.901801	0.934008	Eggs_Alcoholic_drinks	871	871	0.0583724	0.606478	-0.0224383	0.0530361	0.672345	0.920717	Eggs_Alcoholic_drinks	20.4626	6.02596	50.8426	355.514	0.0480655	-0.0406929	-0.846614	0.39721	0.713252	NS	NS	NS
S15_Parabacteroides johnsonii	Meat	205	205	0.0153272	0.592254	-0.0940615	0.186201	0.614004	0.891329	Meat	126	126	0.00509592	0.600788	0.186493	0.175828	0.290976	0.809849	Meat	223	223	-0.0138947	0.560121	0.0680866	0.092883	0.464328	0.802091	Meat	871	871	-0.0016754	0.624155	0.0505429	0.0513487	0.32524	0.782022	Meat	28.8428	32.3462	115.912	379.263	0.0423956	0.0546054	1.288	0.197747	0.716833	NS	NS	NS
S10_Bacteroides eggerthii	Spreads_sweet	205	205	-0.0555374	0.536875	-0.177829	0.170617	0.29855	0.665997	Spreads_sweet	126	126	0.0129582	0.465282	0.142541	0.296782	0.631896	0.978735	Spreads_sweet	223	223	-0.0241369	0.470388	0.0628753	0.118215	0.59536	0.808074	Spreads_sweet	871	871	0.0180257	0.519839	0.0508071	0.0611481	0.406267	0.544735	Spreads_sweet	34.3522	11.3534	71.5569	267.445	0.0509841	0.0353431	0.693218	0.488173	0.718171	NS	NS	NS
S20_Lactococcus lactis	Spreads_sweet	205	205	-0.0555374	0.536875	-0.0152433	0.0920559	0.86865	0.96295	Spreads_sweet	126	126	0.0129582	0.465282	-0.0363959	0.195214	0.852414	0.978735	Spreads_sweet	223	223	-0.0241369	0.470388	0.0574542	0.0753532	0.446663	0.807729	Spreads_sweet	871	871	0.0180257	0.519839	-0.0242158	0.0275585	0.379822	0.544735	Spreads_sweet	118.004	26.2408	176.115	1316.71	0.0247153	-0.0149783	-0.606032	0.544494	0.718171	NS	NS	NS
S26_Roseburia	Spreads_sweet	205	205	-0.0555374	0.536875	0.222971	0.136671	0.104411	0.400541	Spreads_sweet	126	126	0.0129582	0.465282	0.0797589	0.162434	0.624329	0.978735	Spreads_sweet	223	223	-0.0241369	0.470388	-0.0629994	0.0711636	0.377115	0.73693	Spreads_sweet	871	871	0.0180257	0.519839	0.0327956	0.0492672	0.505806	0.611182	Spreads_sweet	53.536	37.9007	197.462	411.987	0.0377726	0.0228729	0.605542	0.544819	0.718171	NS	NS	NS
S6_Bifidobacterium_pseudocatenulatum	Spreads_sweet	205	205	-0.0555374	0.536875	0.208145	0.18515	0.262285	0.633855	Spreads_sweet	126	126	0.0129582	0.465282	-0.415865	0.255084	0.105659	0.978735	Spreads_sweet	223	223	-0.0241369	0.470388	-0.0995557	0.142925	0.486824	0.807729	Spreads_sweet	871	871	0.0180257	0.519839	0.0615721	0.058564	0.293385	0.53176	Spreads_sweet	29.171	15.3686	48.9534	291.567	0.0509607	0.033136	0.650227	0.515546	0.718171	NS	NS	NS
S14_Odoribacter	Vegetables_Fruit_Tea	205	205	-0.11222	0.77642	-0.089095	0.0547728	0.105537	0.555356	Vegetables_Fruit_Tea	126	126	-0.000156026	0.675955	0.0262109	0.153507	0.86471	0.928763	Vegetables_Fruit_Tea	223	223	0.0418139	0.681131	-0.0114095	0.0712535	0.872939	0.958588	Vegetables_Fruit_Tea	871	871	0.0161285	0.690431	0.0173682	0.039694	0.661821	0.756174	Vegetables_Fruit_Tea	333.326	42.4369	196.964	634.675	0.0287789	-0.0164067	-0.570095	0.568613	0.720056	NS	NS	NS
S18_Lactobacillus delbrueckii	Vegetables_Fruit_Tea	205	205	-0.11222	0.77642	0.0744395	0.152468	0.625925	0.82677	Vegetables_Fruit_Tea	126	126	-0.000156026	0.675955	0.154787	0.1602	0.335881	0.675734	Vegetables_Fruit_Tea	223	223	0.0418139	0.681131	0.0196641	0.083836	0.814776	0.958588	Vegetables_Fruit_Tea	871	871	0.0161285	0.690431	0.00758953	0.0400977	0.849921	0.880275	Vegetables_Fruit_Tea	43.017	38.9649	142.278	621.957	0.0343763	0.0197958	0.575857	0.564712	0.720056	NS	NS	NS
S21_Clostridium bolteae, Coprobacillus	Vegetables_Fruit_Tea	205	205	-0.11222	0.77642	-0.0322545	0.0823502	0.695724	0.840667	Vegetables_Fruit_Tea	126	126	-0.000156026	0.675955	-0.0199441	0.0482145	0.679947	0.885561	Vegetables_Fruit_Tea	223	223	0.0418139	0.681131	0.00351396	0.0259637	0.892479	0.958588	Vegetables_Fruit_Tea	871	871	0.0161285	0.690431	-0.00610808	0.0112164	0.586199	0.756174	Vegetables_Fruit_Tea	147.459	430.175	1483.43	7948.63	0.00999515	-0.00566189	-0.566464	0.571079	0.720056	NS	NS	NS
S27_Turicibacter_sanguinis	Vegetables_Fruit_Tea	205	205	-0.11222	0.77642	-0.0569976	0.0378063	0.133238	0.555356	Vegetables_Fruit_Tea	126	126	-0.000156026	0.675955	0.15552	0.136288	0.256095	0.618895	Vegetables_Fruit_Tea	223	223	0.0418139	0.681131	0.0124338	0.0188719	0.510819	0.955139	Vegetables_Fruit_Tea	871	871	0.0161285	0.690431	0.0352416	0.0310587	0.256845	0.572961	Vegetables_Fruit_Tea	699.634	53.8375	2807.82	1036.65	0.0147475	0.00868659	0.589022	0.555847	0.720056	NS	NS	NS
28_Haemophilus, Veillonella	Bread_Legumes	205	205	-0.0736819	0.691941	-0.00904464	0.0430203	0.833734	0.976539	Bread_Legumes	126	126	0.0277121	0.583927	-0.0411888	0.0458754	0.371305	0.633402	Bread_Legumes	223	223	-0.116311	0.444079	0.0484185	0.0326962	0.140225	0.813769	Bread_Legumes	871	871	0.0435099	0.579569	0.0082137	0.0169217	0.627526	0.916912	Bread_Legumes	540.322	475.161	935.418	3492.31	0.0135542	0.00909721	0.671175	0.502109	0.723569	NS	NS	NS
S11_Bacteroides faecis	Bread_Legumes	205	205	-0.0736819	0.691941	-0.164842	0.121667	0.176999	0.65795	Bread_Legumes	126	126	0.0277121	0.583927	-0.297452	0.219233	0.177398	0.579322	Bread_Legumes	223	223	-0.116311	0.444079	0.0857904	0.173711	0.621899	0.860954	Bread_Legumes	871	871	0.0435099	0.579569	-0.0148464	0.0623484	0.811844	0.916912	Bread_Legumes	67.5542	20.8059	33.1393	257.247	0.0513838	-0.0483191	-0.940358	0.347034	0.723569	NS	NS	NS
S16_Propionate/succinate producers	Bread_Legumes	205	205	-0.0736819	0.691941	0.0908316	0.0455531	0.0476007	0.46014	Bread_Legumes	126	126	0.0277121	0.583927	-0.0646401	0.104009	0.535458	0.739442	Bread_Legumes	223	223	-0.116311	0.444079	-0.04756	0.100613	0.636909	0.860954	Bread_Legumes	871	871	0.0435099	0.579569	-0.014613	0.0459708	0.750656	0.916912	Bread_Legumes	481.907	92.44	98.7853	473.19	0.0295357	0.0228418	0.773364	0.439307	0.723569	NS	NS	NS
S19_Streptococci, L. sakei	Bread_Legumes	205	205	-0.0736819	0.691941	0.0213153	0.0403129	0.597612	0.910931	Bread_Legumes	126	126	0.0277121	0.583927	-0.189513	0.0891534	0.035706	0.345158	Bread_Legumes	223	223	-0.116311	0.444079	-0.0460958	0.0853723	0.589812	0.860954	Bread_Legumes	871	871	0.0435099	0.579569	-0.0179489	0.0278773	0.519848	0.916912	Bread_Legumes	615.334	125.813	137.204	1286.76	0.0214912	-0.018543	-0.862818	0.388238	0.723569	NS	NS	NS
S2_Bifidobacterium animalis	Bread_Legumes	205	205	-0.0736819	0.691941	0.0194571	0.0610814	0.750406	0.976539	Bread_Legumes	126	126	0.0277121	0.583927	-0.235907	0.20425	0.25039	0.579322	Bread_Legumes	223	223	-0.116311	0.444079	-0.149435	0.221308	0.500244	0.860954	Bread_Legumes	871	871	0.0435099	0.579569	0.0741503	0.0639391	0.24649	0.794247	Bread_Legumes	268.029	23.9704	20.4177	244.606	0.0423705	0.0262947	0.620591	0.534869	0.723569	NS	NS	NS
S20_Lactococcus lactis	Bread_Legumes	205	205	-0.0736819	0.691941	-0.0105263	0.0777359	0.892423	0.976539	Bread_Legumes	126	126	0.0277121	0.583927	0.116291	0.160795	0.470948	0.732816	Bread_Legumes	223	223	-0.116311	0.444079	0.105507	0.0815426	0.197168	0.813769	Bread_Legumes	871	871	0.0435099	0.579569	0.00464819	0.0271482	0.864097	0.928105	Bread_Legumes	165.484	38.6773	150.394	1356.81	0.0241729	0.0145674	0.602635	0.546752	0.723569	NS	NS	NS
S3_Faecalibacterium_prausnitzii_Bifidobacterium_bifidum	Bread_Legumes	205	205	-0.0736819	0.691941	0.00629601	0.0839844	0.940317	0.976539	Bread_Legumes	126	126	0.0277121	0.583927	-0.179975	0.168232	0.286873	0.579322	Bread_Legumes	223	223	-0.116311	0.444079	0.0531428	0.10754	0.621692	0.860954	Bread_Legumes	871	871	0.0435099	0.579569	0.0344719	0.0443515	0.437228	0.889746	Bread_Legumes	141.776	35.333	86.4691	508.374	0.0359919	0.0215731	0.599387	0.548915	0.723569	NS	NS	NS
S6_Bifidobacterium_pseudocatenulatum	Bread_Legumes	205	205	-0.0736819	0.691941	-0.153892	0.156461	0.326518	0.676358	Bread_Legumes	126	126	0.0277121	0.583927	0.378547	0.210031	0.0740023	0.40872	Bread_Legumes	223	223	-0.116311	0.444079	-0.0189342	0.155313	0.903083	0.935336	Bread_Legumes	871	871	0.0435099	0.579569	0.0476582	0.0576051	0.408281	0.889746	Bread_Legumes	40.8496	22.6691	41.4559	301.355	0.0496091	0.0390619	0.787394	0.431051	0.723569	NS	NS	NS
S8_Eggerthella lenta, Gordonibacter pamelaeae	Bread_Legumes	205	205	-0.0736819	0.691941	-0.0583767	0.101987	0.567708	0.910931	Bread_Legumes	126	126	0.0277121	0.583927	0.0267402	0.118146	0.821341	0.952756	Bread_Legumes	223	223	-0.116311	0.444079	-0.112368	0.0957782	0.242015	0.813769	Bread_Legumes	871	871	0.0435099	0.579569	-0.00842039	0.0374294	0.822059	0.916912	Bread_Legumes	96.1415	71.6413	109.01	713.796	0.0317726	-0.022165	-0.697613	0.485419	0.723569	NS	NS	NS
S9_Bacteroides, Roseburia	Bread_Legumes	205	205	-0.0736819	0.691941	0.0760168	0.043067	0.0790913	0.573412	Bread_Legumes	126	126	0.0277121	0.583927	0.0886764	0.0613526	0.150964	0.579322	Bread_Legumes	223	223	-0.116311	0.444079	0.0411071	0.0599035	0.493305	0.860954	Bread_Legumes	871	871	0.0435099	0.579569	-0.0123009	0.0204265	0.547196	0.916912	Bread_Legumes	539.152	265.665	278.674	2396.7	0.0169511	0.0133661	0.788511	0.430398	0.723569	NS	NS	NS
S7_Alistipes, Bacteroides	Bread_Legumes	205	205	-0.0736819	0.691941	0.00163507	0.0555289	0.976539	0.976539	Bread_Legumes	126	126	0.0277121	0.583927	0.165162	0.0644114	0.0115758	0.244779	Bread_Legumes	223	223	-0.116311	0.444079	-0.0658102	0.063797	0.303428	0.860954	Bread_Legumes	871	871	0.0435099	0.579569	-0.0325915	0.0251799	0.195891	0.773653	Bread_Legumes	324.312	241.032	245.697	1577.22	0.0204625	-0.0114032	-0.557272	0.577342	0.727952	NS	NS	NS
S26_Roseburia	Fish_Nuts	205	205	-0.135461	0.55016	-0.0208968	0.128093	0.870579	0.942259	Fish_Nuts	126	126	0.0141888	0.575752	-0.150119	0.126182	0.236574	0.810424	Fish_Nuts	223	223	0.0520077	0.656703	0.00327915	0.0546687	0.952232	0.952232	Fish_Nuts	871	871	0.0168252	0.570004	-0.0409834	0.0444516	0.356804	0.862276	Fish_Nuts	60.9466	62.8063	334.598	506.087	0.0322005	-0.0314649	-0.977156	0.328492	0.73279	NS	NS	NS
S10_Bacteroides eggerthii	Porridge_ready_Fish_fried_Chocolatemilk	205	205	0.0773975	0.762121	0.0415132	0.115011	0.71852	0.892969	Porridge_ready_Fish_fried_Chocolatemilk	126	126	0.129518	0.829902	0.292915	0.162341	0.0736889	0.640831	Porridge_ready_Fish_fried_Chocolatemilk	223	223	-0.0295003	0.594099	-0.00558974	0.0884267	0.949655	0.949655	Porridge_ready_Fish_fried_Chocolatemilk	871	871	-0.0289628	0.569582	0.0136011	0.0548944	0.804373	0.994502	Porridge_ready_Fish_fried_Chocolatemilk	75.5999	37.9442	127.889	331.852	0.0417652	0.0314878	0.753924	0.450895	0.734121	NS	NS	NS
S18_Lactobacillus delbrueckii	Porridge_ready_Fish_fried_Chocolatemilk	205	205	0.0773975	0.762121	-0.0322905	0.154596	0.834763	0.892969	Porridge_ready_Fish_fried_Chocolatemilk	126	126	0.129518	0.829902	-0.153163	0.126249	0.227445	0.640831	Porridge_ready_Fish_fried_Chocolatemilk	223	223	-0.0295003	0.594099	0.110604	0.095042	0.245809	0.786947	Porridge_ready_Fish_fried_Chocolatemilk	871	871	-0.0289628	0.569582	-0.0535075	0.0489856	0.275001	0.857665	Porridge_ready_Fish_fried_Chocolatemilk	41.8411	62.7398	110.705	416.738	0.0397771	-0.0332497	-0.8359	0.403211	0.734121	NS	NS	NS
S2_Bifidobacterium animalis	Porridge_ready_Fish_fried_Chocolatemilk	205	205	0.0773975	0.762121	-0.0610469	0.0484632	0.209269	0.892969	Porridge_ready_Fish_fried_Chocolatemilk	126	126	0.129518	0.829902	0.152744	0.137111	0.267499	0.640831	Porridge_ready_Fish_fried_Chocolatemilk	223	223	-0.0295003	0.594099	-0.046763	0.152532	0.759458	0.880971	Porridge_ready_Fish_fried_Chocolatemilk	871	871	-0.0289628	0.569582	-0.000833788	0.0583937	0.988611	0.994502	Porridge_ready_Fish_fried_Chocolatemilk	425.771	53.1931	42.9813	293.27	0.0350239	-0.0246825	-0.704734	0.480976	0.734121	NS	NS	NS
S27_Turicibacter_sanguinis	Porridge_ready_Fish_fried_Chocolatemilk	205	205	0.0773975	0.762121	-0.0241997	0.0384951	0.530303	0.892969	Porridge_ready_Fish_fried_Chocolatemilk	126	126	0.129518	0.829902	-0.12534	0.107619	0.246465	0.640831	Porridge_ready_Fish_fried_Chocolatemilk	223	223	-0.0295003	0.594099	-0.0150471	0.0214504	0.483891	0.786947	Porridge_ready_Fish_fried_Chocolatemilk	871	871	-0.0289628	0.569582	0.0182794	0.0376356	0.627314	0.994502	Porridge_ready_Fish_fried_Chocolatemilk	674.82	86.3416	2173.35	705.997	0.0165737	-0.0128965	-0.778135	0.43649	0.734121	NS	NS	NS
S3_Faecalibacterium_prausnitzii_Bifidobacterium_bifidum	Porridge_ready_Fish_fried_Chocolatemilk	205	205	0.0773975	0.762121	-0.0116273	0.066889	0.862177	0.892969	Porridge_ready_Fish_fried_Chocolatemilk	126	126	0.129518	0.829902	-0.0230695	0.113145	0.838785	0.972991	Porridge_ready_Fish_fried_Chocolatemilk	223	223	-0.0295003	0.594099	0.0342869	0.0739985	0.643585	0.864192	Porridge_ready_Fish_fried_Chocolatemilk	871	871	-0.0289628	0.569582	0.0442774	0.0404596	0.274101	0.857665	Porridge_ready_Fish_fried_Chocolatemilk	223.507	78.1141	182.622	610.883	0.0302182	0.0263979	0.873578	0.382348	0.734121	NS	NS	NS
S6_Bifidobacterium_pseudocatenulatum	Porridge_ready_Fish_fried_Chocolatemilk	205	205	0.0773975	0.762121	0.0435714	0.124866	0.727499	0.892969	Porridge_ready_Fish_fried_Chocolatemilk	126	126	0.129518	0.829902	-0.247052	0.141041	0.0823908	0.640831	Porridge_ready_Fish_fried_Chocolatemilk	223	223	-0.0295003	0.594099	-0.159665	0.10641	0.134945	0.786947	Porridge_ready_Fish_fried_Chocolatemilk	871	871	-0.0289628	0.569582	0.0186088	0.0525852	0.723515	0.994502	Porridge_ready_Fish_fried_Chocolatemilk	64.1377	50.2703	88.3153	361.637	0.0420942	-0.0301157	-0.715436	0.47434	0.734121	NS	NS	NS
S25_Lachnospiraceae bacterium 3 1 57FAA	Spreads_sweet	205	205	-0.0555374	0.536875	-0.0360849	0.150249	0.810448	0.94012	Spreads_sweet	126	126	0.0129582	0.465282	0.163027	0.143642	0.258655	0.978735	Spreads_sweet	223	223	-0.0241369	0.470388	-0.0520335	0.102732	0.613022	0.808074	Spreads_sweet	871	871	0.0180257	0.519839	-0.0598589	0.0731246	0.413247	0.544735	Spreads_sweet	44.2971	48.4663	94.7519	187.014	0.0516723	-0.0262245	-0.507516	0.611792	0.740129	NS	NS	NS
S27_Turicibacter_sanguinis	Spreads_sweet	205	205	-0.0555374	0.536875	-0.0547744	0.057169	0.339168	0.699837	Spreads_sweet	126	126	0.0129582	0.465282	-0.378697	0.192327	0.0512544	0.978735	Spreads_sweet	223	223	-0.0241369	0.470388	-0.0172704	0.0297839	0.562724	0.808074	Spreads_sweet	871	871	0.0180257	0.519839	0.0443565	0.0418961	0.290038	0.53176	Spreads_sweet	305.97	27.0346	1127.29	569.708	0.0221948	-0.0104413	-0.470438	0.638042	0.740129	NS	NS	NS
S9_Bacteroides, Roseburia	Spreads_sweet	205	205	-0.0555374	0.536875	-0.116636	0.0507252	0.0225269	0.32664	Spreads_sweet	126	126	0.0129582	0.465282	-0.0555117	0.0748073	0.459499	0.978735	Spreads_sweet	223	223	-0.0241369	0.470388	-0.0627673	0.0550806	0.255728	0.674193	Spreads_sweet	871	871	0.0180257	0.519839	0.0206821	0.020764	0.3195	0.537725	Spreads_sweet	388.644	178.695	329.611	2319.42	0.0176326	-0.00869549	-0.493148	0.621908	0.740129	NS	NS	NS
S21_Clostridium bolteae, Coprobacillus	Fruit_Juice_Milk	205	205	0.0499406	0.971662	0.100398	0.0659176	0.12935	0.677861	Fruit_Juice_Milk	126	126	0.0470696	0.883709	0.0414385	0.0420071	0.32611	0.986097	Fruit_Juice_Milk	223	223	-0.0460608	0.585582	0.035442	0.0315551	0.262715	0.958707	Fruit_Juice_Milk	871	871	-0.00752221	0.66348	0.0011354	0.011939	0.924259	0.968309	Fruit_Juice_Milk	230.143	566.702	1004.29	7015.53	0.01065	0.0102248	0.96008	0.337015	0.742211	NS	NS	NS
S9_Bacteroides, Roseburia	Fruit_Juice_Milk	205	205	0.0499406	0.971662	-0.000728386	0.0274538	0.97886	0.97886	Fruit_Juice_Milk	126	126	0.0470696	0.883709	0.00711209	0.0451787	0.875178	0.986097	Fruit_Juice_Milk	223	223	-0.0460608	0.585582	0.0107482	0.0428231	0.802059	0.969155	Fruit_Juice_Milk	871	871	-0.00752221	0.66348	-0.0219155	0.0166073	0.187309	0.601738	Fruit_Juice_Milk	1326.77	489.928	545.31	3625.77	0.0129231	-0.0118711	-0.918593	0.358309	0.742211	NS	NS	NS
S2_Bifidobacterium animalis	Pasta_Pizza	205	205	-0.126846	0.636288	-0.101813	0.0617456	0.100744	0.322418	Pasta_Pizza	126	126	-0.0709619	0.607965	0.0673127	0.208724	0.747638	0.989316	Pasta_Pizza	223	223	0.00315542	0.506156	0.235508	0.2098	0.262876	0.550438	Pasta_Pizza	871	871	0.0399249	0.617093	-0.0274578	0.0622973	0.659501	0.936609	Pasta_Pizza	262.293	22.9539	22.719	257.668	0.0420467	-0.0475295	-1.1304	0.258309	0.749097	NS	NS	NS
S9_Bacteroides, Roseburia	Pasta_Pizza	205	205	-0.126846	0.636288	0.0845085	0.0437192	0.0546647	0.264213	Pasta_Pizza	126	126	-0.0709619	0.607965	0.0325561	0.0628481	0.605403	0.989316	Pasta_Pizza	223	223	0.00315542	0.506156	-0.0677744	0.056769	0.233835	0.550438	Pasta_Pizza	871	871	0.0399249	0.617093	0.0153332	0.0198861	0.440886	0.913265	Pasta_Pizza	523.184	253.172	310.297	2528.72	0.0166312	0.0194168	1.16749	0.243011	0.749097	NS	NS	NS
S8_Eggerthella lenta, Gordonibacter pamelaeae	Pasta_Pizza	205	205	-0.126846	0.636288	-0.118217	0.103444	0.254503	0.461287	Pasta_Pizza	126	126	-0.0709619	0.607965	-0.146695	0.119085	0.220497	0.989316	Pasta_Pizza	223	223	0.00315542	0.506156	0.140652	0.0898258	0.118865	0.430885	Pasta_Pizza	871	871	0.0399249	0.617093	-0.0401681	0.03609	0.266025	0.773717	Pasta_Pizza	93.4524	70.5154	123.936	767.761	0.0307778	-0.0329645	-1.07105	0.284146	0.749113	NS	NS	NS
S17_Alistipes	Coffee_milk_Soup	205	205	-0.0190486	0.599621	0.0611684	0.195147	0.754268	0.895957	Coffee_milk_Soup	126	126	0.00261508	0.755444	-0.0344367	0.130602	0.792482	0.953261	Coffee_milk_Soup	223	223	-0.00397076	0.684592	0.0294449	0.0870018	0.735358	0.888558	Coffee_milk_Soup	871	871	0.00528062	0.524601	0.0806951	0.0560415	0.150253	0.674534	Coffee_milk_Soup	26.259	58.6273	132.113	318.406	0.0432174	0.0544842	1.2607	0.207417	0.751886	NS	NS	NS
28_Haemophilus, Veillonella	Sweetened_tea_yoghurtdrink	205	205	0.111425	1.12755	0.00314973	0.0240231	0.895843	0.927838	Sweetened_tea_yoghurtdrink	126	126	0.0674218	0.540567	-0.0280922	0.0502102	0.577006	0.768655	Sweetened_tea_yoghurtdrink	223	223	0.00250442	0.480442	-0.0347858	0.0318276	0.27574	0.734174	Sweetened_tea_yoghurtdrink	871	871	-0.0373747	0.434722	-0.00579549	0.0200482	0.772595	0.901398	Sweetened_tea_yoghurtdrink	1732.77	396.658	987.169	2487.98	0.0133576	-0.00971415	-0.727238	0.46708	0.752518	NS	NS	NS
S23_B. hydrogenotrophica	Sweetened_tea_yoghurtdrink	205	205	0.111425	1.12755	0.0262425	0.0893548	0.769302	0.927838	Sweetened_tea_yoghurtdrink	126	126	0.0674218	0.540567	-0.299983	0.265505	0.26079	0.756291	Sweetened_tea_yoghurtdrink	223	223	0.00250442	0.480442	-0.218945	0.138231	0.114673	0.501058	Sweetened_tea_yoghurtdrink	871	871	-0.0373747	0.434722	-0.0122527	0.0597528	0.837577	0.93422	Sweetened_tea_yoghurtdrink	125.246	14.1858	52.3343	280.081	0.0460362	-0.03361	-0.730078	0.465342	0.752518	NS	NS	NS
S14_Odoribacter	Fruit_Juice_Milk	205	205	0.0499406	0.971662	-0.00531625	0.0431336	0.902044	0.973185	Fruit_Juice_Milk	126	126	0.0470696	0.883709	-0.0179507	0.131926	0.891997	0.986097	Fruit_Juice_Milk	223	223	-0.0460608	0.585582	-0.043323	0.0869227	0.618728	0.958707	Fruit_Juice_Milk	871	871	-0.00752221	0.66348	-0.0386006	0.043128	0.371025	0.717164	Fruit_Juice_Milk	537.487	57.4562	132.353	537.629	0.0281169	-0.0240137	-0.854066	0.393068	0.758868	NS	NS	NS
S2_Bifidobacterium animalis	Fruit_Juice_Milk	205	205	0.0499406	0.971662	0.0241208	0.0386296	0.533072	0.841765	Fruit_Juice_Milk	126	126	0.0470696	0.883709	0.0590592	0.149858	0.694206	0.986097	Fruit_Juice_Milk	223	223	-0.0460608	0.585582	0.0117325	0.158222	0.940958	0.999286	Fruit_Juice_Milk	871	871	-0.00752221	0.66348	0.0212622	0.0520612	0.683075	0.943294	Fruit_Juice_Milk	670.13	44.5286	39.9456	368.953	0.0298334	0.0241263	0.808703	0.418686	0.758868	NS	NS	NS
28_Haemophilus, Veillonella	Pastry_Cream	205	205	-0.0651555	0.556024	-0.11193	0.0567843	0.0503507	0.730085	Pastry_Cream	126	126	0.0592037	0.832987	-0.0579594	0.0340231	0.0913989	0.441761	Pastry_Cream	223	223	-0.0509842	0.476141	-0.00620783	0.0290613	0.831069	0.901239	Pastry_Cream	871	871	0.0200538	0.596495	-0.00107923	0.0153145	0.943836	0.943836	Pastry_Cream	310.13	863.879	1184.05	4263.79	0.0122888	-0.0146084	-1.18875	0.234536	0.764208	NS	NS	NS
S12_Bacteroides finegoldii	Pastry_Cream	205	205	-0.0651555	0.556024	-0.0481916	0.179073	0.788119	0.927944	Pastry_Cream	126	126	0.0592037	0.832987	0.187315	0.158358	0.239204	0.578077	Pastry_Cream	223	223	-0.0509842	0.476141	-0.113151	0.139591	0.418488	0.802771	Pastry_Cream	871	871	0.0200538	0.596495	-0.06714	0.0532793	0.207955	0.837149	Pastry_Cream	31.1844	39.8768	51.32	352.276	0.0458997	-0.0494926	-1.07828	0.28091	0.764208	NS	NS	NS
S13_Escherichia coli, Bacteroides fragilis	Pastry_Cream	205	205	-0.0651555	0.556024	-0.0923356	0.0922925	0.318351	0.910744	Pastry_Cream	126	126	0.0592037	0.832987	0.0118749	0.0598533	0.843079	0.976616	Pastry_Cream	223	223	-0.0509842	0.476141	-0.0117518	0.0461069	0.799065	0.901239	Pastry_Cream	871	871	0.0200538	0.596495	-0.0209472	0.0205825	0.309102	0.837149	Pastry_Cream	117.4	279.141	470.402	2360.49	0.0176024	-0.0193649	-1.10013	0.271275	0.764208	NS	NS	NS
S19_Streptococci, L. sakei	Pastry_Cream	205	205	-0.0651555	0.556024	-0.0970418	0.0446119	0.0308734	0.730085	Pastry_Cream	126	126	0.0592037	0.832987	-0.0462448	0.0680578	0.498215	0.842478	Pastry_Cream	223	223	-0.0509842	0.476141	0.0849406	0.0736988	0.250411	0.802771	Pastry_Cream	871	871	0.0200538	0.596495	-0.002498	0.0254282	0.921767	0.943836	Pastry_Cream	502.456	215.896	184.111	1546.57	0.020207	-0.0191783	-0.949088	0.342576	0.764208	NS	NS	NS
S2_Bifidobacterium animalis	Pastry_Cream	205	205	-0.0651555	0.556024	-0.056324	0.0676432	0.406033	0.910744	Pastry_Cream	126	126	0.0592037	0.832987	0.00944029	0.159802	0.952991	0.987026	Pastry_Cream	223	223	-0.0509842	0.476141	-0.172808	0.194426	0.375089	0.802771	Pastry_Cream	871	871	0.0200538	0.596495	-0.0252716	0.0585605	0.666179	0.884679	Pastry_Cream	218.551	39.1593	26.454	291.602	0.0416751	-0.0414763	-0.99523	0.319624	0.764208	NS	NS	NS
S21_Clostridium bolteae, Coprobacillus	Pastry_Cream	205	205	-0.0651555	0.556024	0.0507694	0.117479	0.666102	0.916899	Pastry_Cream	126	126	0.0592037	0.832987	0.0129463	0.0439248	0.768759	0.932301	Pastry_Cream	223	223	-0.0509842	0.476141	-0.0078	0.0383611	0.839084	0.901239	Pastry_Cream	871	871	0.0200538	0.596495	0.0202557	0.0136445	0.13805	0.837149	Pastry_Cream	72.4569	518.3	679.544	5371.34	0.0122705	0.0171476	1.39747	0.162273	0.764208	NS	NS	NS
S23_B. hydrogenotrophica	Pastry_Cream	205	205	-0.0651555	0.556024	-0.170831	0.17451	0.328807	0.910744	Pastry_Cream	126	126	0.0592037	0.832987	0.24222	0.20109	0.230754	0.578077	Pastry_Cream	223	223	-0.0509842	0.476141	-0.183267	0.144344	0.205568	0.77297	Pastry_Cream	871	871	0.0200538	0.596495	-0.0507481	0.0460929	0.271205	0.837149	Pastry_Cream	32.8368	24.7297	47.9956	470.687	0.0416577	-0.0560556	-1.34563	0.178423	0.764208	NS	NS	NS
S25_Lachnospiraceae bacterium 3 1 57FAA	Pastry_Cream	205	205	-0.0651555	0.556024	-0.218146	0.13988	0.120463	0.910744	Pastry_Cream	126	126	0.0592037	0.832987	0.122341	0.0920651	0.186416	0.578077	Pastry_Cream	223	223	-0.0509842	0.476141	0.0574838	0.0980252	0.558204	0.851995	Pastry_Cream	871	871	0.0200538	0.596495	0.0691193	0.0658002	0.293809	0.837149	Pastry_Cream	51.1077	117.981	104.07	230.964	0.0445381	0.0500501	1.12376	0.261116	0.764208	NS	NS	NS
S26_Roseburia	Pastry_Cream	205	205	-0.0651555	0.556024	0.121545	0.12855	0.345571	0.910744	Pastry_Cream	126	126	0.0592037	0.832987	0.0706925	0.104255	0.499066	0.842478	Pastry_Cream	223	223	-0.0509842	0.476141	0.0315278	0.0629346	0.616972	0.89461	Pastry_Cream	871	871	0.0200538	0.596495	0.0166002	0.0442903	0.707899	0.884679	Pastry_Cream	60.5137	92.0031	252.476	509.781	0.0330631	0.0331028	1.0012	0.316729	0.764208	NS	NS	NS
S4_Bifidobacterium_catenulatum	Pastry_Cream	205	205	-0.0651555	0.556024	0.0730282	0.147004	0.619896	0.916899	Pastry_Cream	126	126	0.0592037	0.832987	0.128873	0.0845473	0.130072	0.538869	Pastry_Cream	223	223	-0.0509842	0.476141	0.128912	0.139941	0.357975	0.802771	Pastry_Cream	871	871	0.0200538	0.596495	0.0284559	0.0362753	0.433008	0.837149	Pastry_Cream	46.2742	139.894	51.0634	759.939	0.0316676	0.0497561	1.5712	0.116136	0.764208	NS	NS	NS
S5_Streptococcus, Bifidobacterium dentium	Pastry_Cream	205	205	-0.0651555	0.556024	-0.0341295	0.0580411	0.55723	0.916899	Pastry_Cream	126	126	0.0592037	0.832987	-0.0272401	0.0533511	0.610676	0.885931	Pastry_Cream	223	223	-0.0509842	0.476141	-0.0104852	0.0269674	0.697852	0.901239	Pastry_Cream	871	871	0.0200538	0.596495	0.0227598	0.012988	0.0800871	0.837149	Pastry_Cream	296.845	351.329	1375.06	5928.12	0.0112145	0.0126775	1.13046	0.258282	0.764208	NS	NS	NS
S6_Bifidobacterium_pseudocatenulatum	Pastry_Cream	205	205	-0.0651555	0.556024	0.102598	0.173796	0.555635	0.916899	Pastry_Cream	126	126	0.0592037	0.832987	-0.0805108	0.165455	0.627429	0.885931	Pastry_Cream	223	223	-0.0509842	0.476141	-0.181959	0.135997	0.182307	0.77297	Pastry_Cream	871	871	0.0200538	0.596495	-0.0418588	0.0527257	0.427473	0.837149	Pastry_Cream	33.1072	36.529	54.0684	359.713	0.0454819	-0.050556	-1.11156	0.266327	0.764208	NS	NS	NS
S9_Bacteroides, Roseburia	Sweetened_tea_yoghurtdrink	205	205	0.111425	1.12755	-0.0260183	0.0245065	0.28967	0.739706	Sweetened_tea_yoghurtdrink	126	126	0.0674218	0.540567	-0.133132	0.0623564	0.0347932	0.37509	Sweetened_tea_yoghurtdrink	223	223	0.00250442	0.480442	-0.0158828	0.0505837	0.753831	0.877896	Sweetened_tea_yoghurtdrink	871	871	-0.0373747	0.434722	0.024164	0.024211	0.318531	0.901398	Sweetened_tea_yoghurtdrink	1665.09	257.181	390.821	1705.98	0.0157738	-0.010586	-0.671109	0.502151	0.766442	NS	NS	NS
S21_Clostridium bolteae, Coprobacillus	Bread_Legumes	205	205	-0.0736819	0.691941	-0.129267	0.105326	0.22118	0.65795	Bread_Legumes	126	126	0.0277121	0.583927	0.101912	0.0585427	0.0845627	0.40872	Bread_Legumes	223	223	-0.116311	0.444079	-0.0503472	0.0430619	0.24373	0.813769	Bread_Legumes	871	871	0.0435099	0.579569	-0.00561151	0.0147709	0.704115	0.916912	Bread_Legumes	90.1427	291.779	539.278	4583.39	0.0134784	-0.00631971	-0.468878	0.639157	0.772315	NS	NS	NS
S11_Bacteroides faecis	Sugar_Sweets	205	205	0.184389	1.11711	-0.022105	0.0764378	0.772737	0.93287	Sugar_Sweets	126	126	0.0308263	0.62208	-0.137368	0.194191	0.480697	0.770708	Sugar_Sweets	223	223	-0.0900997	0.489801	-0.0272494	0.158729	0.863854	0.866107	Sugar_Sweets	871	871	-0.0242716	0.577625	-0.0342028	0.0599479	0.568459	0.905322	Sugar_Sweets	171.153	26.518	39.6908	278.261	0.0440387	-0.0349576	-0.793793	0.427316	0.77451	NS	NS	NS
S21_Clostridium bolteae, Coprobacillus	Eggs_Alcoholic_drinks	205	205	-0.104303	0.43925	-0.14529	0.149514	0.332372	0.706598	Eggs_Alcoholic_drinks	126	126	-0.134042	0.302491	-0.0387441	0.108024	0.720548	0.986032	Eggs_Alcoholic_drinks	223	223	-0.0546888	0.448173	0.0163363	0.039173	0.677106	0.888454	Eggs_Alcoholic_drinks	871	871	0.0583724	0.606478	0.00893028	0.0136714	0.513804	0.827795	Eggs_Alcoholic_drinks	44.7341	85.696	651.668	5350.24	0.0127699	0.00792608	0.620685	0.534807	0.77547	NS	NS	NS
S10_Bacteroides eggerthii	Sugar_Sweets	205	205	0.184389	1.11711	0.155404	0.0896902	0.0847025	0.38456	Sugar_Sweets	126	126	0.0308263	0.62208	0.265552	0.214617	0.218382	0.65727	Sugar_Sweets	223	223	-0.0900997	0.489801	-0.127366	0.116954	0.27735	0.506409	Sugar_Sweets	871	871	-0.0242716	0.577625	0.00400561	0.057849	0.944813	0.97542	Sugar_Sweets	124.311	21.7105	73.109	298.819	0.0439396	0.032762	0.745614	0.4559	0.777713	NS	NS	NS
28_Haemophilus, Veillonella	Ready_meals	205	205	-0.0761095	0.668047	-0.0721043	0.0399941	0.0731999	0.564307	Ready_meals	126	126	-0.0726462	0.963861	0.00814267	0.0259097	0.753933	0.982067	Ready_meals	223	223	0.0593805	0.744316	-0.00964857	0.0180042	0.592622	0.993664	Ready_meals	871	871	0.0135936	0.640699	-0.00160006	0.0141417	0.909944	0.96952	Ready_meals	625.186	1489.62	3084.97	5000.29	0.00990144	-0.00693284	-0.700185	0.483812	0.779475	NS	NS	NS
S14_Odoribacter	Ready_meals	205	205	-0.0761095	0.668047	0.0953999	0.0637431	0.136212	0.564307	Ready_meals	126	126	-0.0726462	0.963861	-0.0163659	0.106915	0.878597	0.982067	Ready_meals	223	223	0.0593805	0.744316	0.00122934	0.0650534	0.984941	0.993664	Ready_meals	871	871	0.0135936	0.640699	0.00219587	0.0451197	0.961196	0.96952	Ready_meals	246.112	87.4831	236.298	491.21	0.0306988	0.022068	0.718857	0.472229	0.779475	NS	NS	NS
S16_Propionate/succinate producers	Ready_meals	205	205	-0.0761095	0.668047	0.00418686	0.0498604	0.933168	0.993308	Ready_meals	126	126	-0.0726462	0.963861	0.0195224	0.0616169	0.751919	0.982067	Ready_meals	223	223	0.0593805	0.744316	-0.0331077	0.0539356	0.539977	0.993664	Ready_meals	871	871	0.0135936	0.640699	-0.0435018	0.0389744	0.264665	0.734791	Ready_meals	402.242	263.391	343.755	658.325	0.0244872	-0.0199034	-0.812807	0.416329	0.779475	NS	NS	NS
S27_Turicibacter_sanguinis	Ready_meals	205	205	-0.0761095	0.668047	-0.0539754	0.0452499	0.234356	0.728757	Ready_meals	126	126	-0.0726462	0.963861	-0.0577153	0.095288	0.545862	0.982067	Ready_meals	223	223	0.0593805	0.744316	0.00245014	0.0169676	0.885342	0.993664	Ready_meals	871	871	0.0135936	0.640699	-0.0318358	0.0351916	0.365923	0.816289	Ready_meals	488.388	110.135	3473.45	807.462	0.0143158	-0.0102293	-0.714545	0.47489	0.779475	NS	NS	NS
S13_Escherichia coli, Bacteroides fragilis	Coffee_milk_Soup	205	205	-0.0190486	0.599621	0.0918309	0.0869554	0.292271	0.765539	Coffee_milk_Soup	126	126	0.00261508	0.755444	0.0456684	0.0557181	0.414107	0.953261	Coffee_milk_Soup	223	223	-0.00397076	0.684592	0.0738744	0.0302679	0.0154922	0.293119	Coffee_milk_Soup	871	871	0.00528062	0.524601	-0.0168705	0.0215464	0.433853	0.855928	Coffee_milk_Soup	132.253	322.112	1091.53	2154.03	0.0164401	0.0192306	1.16974	0.242106	0.780121	NS	NS	NS
28_Haemophilus, Veillonella	Wine_Alcohol	205	205	-0.27214	0.559289	-0.0753181	0.0459122	0.102776	0.496752	Wine_Alcohol	126	126	-0.21131	0.583969	0.0157233	0.0403833	0.697797	0.892704	Wine_Alcohol	223	223	-0.0117566	0.664384	0.00490191	0.0202482	0.808959	0.934278	Wine_Alcohol	871	871	0.0981863	0.783786	0.0102889	0.0109756	0.348809	0.674363	Wine_Alcohol	474.399	613.191	2439.09	8301.31	0.00919485	0.00602624	0.655393	0.512215	0.781802	NS	NS	NS
S29_Sutterella wadsworthensis	Wine_Alcohol	205	205	-0.27214	0.559289	0.103214	0.11365	0.364942	0.755952	Wine_Alcohol	126	126	-0.21131	0.583969	0.191582	0.090858	0.0372928	0.540746	Wine_Alcohol	223	223	-0.0117566	0.664384	-0.0461648	0.0595308	0.438902	0.934278	Wine_Alcohol	871	871	0.0981863	0.783786	0.00628673	0.0149595	0.674413	0.830288	Wine_Alcohol	77.4217	121.136	282.174	4468.56	0.0142144	0.00934772	0.657623	0.51078	0.781802	NS	NS	NS
S15_Parabacteroides johnsonii	Fruit_Juice_Milk	205	205	0.0499406	0.971662	-0.0401944	0.111849	0.719705	0.948702	Fruit_Juice_Milk	126	126	0.0470696	0.883709	-0.0881647	0.140014	0.530097	0.986097	Fruit_Juice_Milk	223	223	-0.0460608	0.585582	-0.0391211	0.0891363	0.661177	0.958707	Fruit_Juice_Milk	871	871	-0.00752221	0.66348	-0.00965771	0.0475274	0.839024	0.968309	Fruit_Juice_Milk	79.9347	51.0105	125.861	442.703	0.0378097	-0.0241735	-0.639346	0.522598	0.78324	NS	NS	NS
S16_Propionate/succinate producers	Fruit_Juice_Milk	205	205	0.0499406	0.971662	0.0182199	0.0327721	0.578901	0.841765	Fruit_Juice_Milk	126	126	0.0470696	0.883709	0.0114145	0.0760546	0.880951	0.986097	Fruit_Juice_Milk	223	223	-0.0460608	0.585582	-0.0634464	0.0693755	0.361469	0.958707	Fruit_Juice_Milk	871	871	-0.00752221	0.66348	0.0312354	0.0374646	0.404664	0.717164	Fruit_Juice_Milk	931.088	172.882	207.772	712.457	0.0222266	0.0138372	0.622549	0.533581	0.78324	NS	NS	NS
S19_Streptococci, L. sakei	Fruit_Juice_Milk	205	205	0.0499406	0.971662	-0.0231367	0.025847	0.371867	0.718944	Fruit_Juice_Milk	126	126	0.0470696	0.883709	0.0144502	0.063879	0.821446	0.986097	Fruit_Juice_Milk	223	223	-0.0460608	0.585582	0.00103533	0.0607379	0.986416	0.999286	Fruit_Juice_Milk	871	871	-0.00752221	0.66348	0.0402624	0.0233316	0.0847793	0.409767	Fruit_Juice_Milk	1496.86	245.066	271.07	1837.01	0.0161164	0.0112083	0.695456	0.486769	0.78324	NS	NS	NS
S5_Streptococcus, Bifidobacterium dentium	Fruit_Juice_Milk	205	205	0.0499406	0.971662	-0.0419327	0.0302095	0.166778	0.677861	Fruit_Juice_Milk	126	126	0.0470696	0.883709	0.0543941	0.0605206	0.370756	0.986097	Fruit_Juice_Milk	223	223	-0.0460608	0.585582	0.0150569	0.0253377	0.553052	0.958707	Fruit_Juice_Milk	871	871	-0.00752221	0.66348	0.00916735	0.0113721	0.420407	0.717164	Fruit_Juice_Milk	1095.75	273.019	1557.63	7732.45	0.009686	0.00593328	0.612563	0.540166	0.78324	NS	NS	NS
S11_Bacteroides faecis	Eggs_Alcoholic_drinks	205	205	-0.104303	0.43925	-0.13826	0.173532	0.426553	0.706598	Eggs_Alcoholic_drinks	126	126	-0.134042	0.302491	0.24863	0.422187	0.557029	0.986032	Eggs_Alcoholic_drinks	223	223	-0.0546888	0.448173	0.0106213	0.156945	0.946106	0.946106	Eggs_Alcoholic_drinks	871	871	0.0583724	0.606478	-0.0277507	0.0573805	0.628773	0.920717	Eggs_Alcoholic_drinks	33.2078	5.61035	40.5981	303.719	0.0510886	-0.0292158	-0.571866	0.567413	0.78357	NS	NS	NS
28_Haemophilus, Veillonella	Pasta_Pizza	205	205	-0.126846	0.636288	-0.0261151	0.0437205	0.551098	0.726447	Pasta_Pizza	126	126	-0.0709619	0.607965	-0.0851401	0.0558715	0.130523	0.989316	Pasta_Pizza	223	223	0.00315542	0.506156	-0.0373155	0.0316605	0.239959	0.550438	Pasta_Pizza	871	871	0.0399249	0.617093	0.00130902	0.0164539	0.936609	0.936609	Pasta_Pizza	523.154	320.346	997.619	3693.7	0.0134415	-0.0132485	-0.98564	0.32431	0.783749	NS	NS	NS
S6_Bifidobacterium_pseudocatenulatum	Sugar_Sweets	205	205	0.184389	1.11711	0.0481892	0.0980455	0.623616	0.93287	Sugar_Sweets	126	126	0.0308263	0.62208	-0.223731	0.186386	0.232362	0.65727	Sugar_Sweets	223	223	-0.0900997	0.489801	0.147963	0.141496	0.29686	0.506409	Sugar_Sweets	871	871	-0.0242716	0.577625	-0.066255	0.055372	0.231812	0.879516	Sugar_Sweets	104.027	28.7856	49.9476	326.152	0.0443281	-0.0307442	-0.693561	0.487958	0.786154	NS	NS	NS
28_Haemophilus, Veillonella	Fish_Nuts	205	205	-0.135461	0.55016	-0.00958007	0.0474459	0.840227	0.942259	Fish_Nuts	126	126	0.0141888	0.575752	-0.0186301	0.0440692	0.673337	0.922457	Fish_Nuts	223	223	0.0520077	0.656703	0.027529	0.0208046	0.187282	0.509322	Fish_Nuts	871	871	0.0168252	0.570004	9.70233e-05	0.0153717	0.994965	0.994965	Fish_Nuts	444.225	514.909	2310.37	4232.09	0.0115458	0.00668714	0.579185	0.562464	0.788764	NS	NS	NS
S1_Acetate/butyrate producers	Fish_Nuts	205	205	-0.135461	0.55016	0.179946	0.0660293	0.00699818	0.202947	Fish_Nuts	126	126	0.0141888	0.575752	0.0626832	0.0474751	0.189299	0.810424	Fish_Nuts	223	223	0.0520077	0.656703	-0.0119664	0.0264524	0.651453	0.787173	Fish_Nuts	871	871	0.0168252	0.570004	0.00175049	0.0139009	0.89982	0.994965	Fish_Nuts	229.364	443.678	1429.12	5175.01	0.0117225	0.0083881	0.715558	0.474264	0.788764	NS	NS	NS
S13_Escherichia coli, Bacteroides fragilis	Fish_Nuts	205	205	-0.135461	0.55016	-0.134399	0.0881761	0.12911	0.785922	Fish_Nuts	126	126	0.0141888	0.575752	-0.146069	0.0723452	0.0457877	0.76529	Fish_Nuts	223	223	0.0520077	0.656703	0.0427751	0.0317235	0.178998	0.509322	Fish_Nuts	871	871	0.0168252	0.570004	-0.0197357	0.0201826	0.328423	0.862276	Fish_Nuts	128.617	191.065	993.661	2454.96	0.0162902	-0.0135714	-0.833098	0.40479	0.788764	NS	NS	NS
S15_Parabacteroides johnsonii	Fish_Nuts	205	205	-0.135461	0.55016	-0.120907	0.194863	0.535657	0.864	Fish_Nuts	126	126	0.0141888	0.575752	0.185554	0.18102	0.307402	0.810424	Fish_Nuts	223	223	0.0520077	0.656703	-0.0531573	0.0768443	0.489832	0.734777	Fish_Nuts	871	871	0.0168252	0.570004	-0.0241904	0.0532989	0.650042	0.992169	Fish_Nuts	26.3356	30.5173	169.347	352.017	0.0415867	-0.0260092	-0.625421	0.531695	0.788764	NS	NS	NS
S16_Propionate/succinate producers	Fish_Nuts	205	205	-0.135461	0.55016	0.0451468	0.0483728	0.351858	0.830217	Fish_Nuts	126	126	0.0141888	0.575752	-0.0680475	0.0984092	0.490602	0.90773	Fish_Nuts	223	223	0.0520077	0.656703	-0.0873871	0.0584643	0.136471	0.509322	Fish_Nuts	871	871	0.0168252	0.570004	0.0605567	0.0419693	0.149418	0.638138	Fish_Nuts	427.363	103.259	292.562	567.723	0.0268133	0.0151561	0.565246	0.571907	0.788764	NS	NS	NS
S17_Alistipes	Fish_Nuts	205	205	-0.135461	0.55016	-0.297206	0.197475	0.133901	0.785922	Fish_Nuts	126	126	0.0141888	0.575752	-0.0517946	0.170008	0.761154	0.922457	Fish_Nuts	223	223	0.0520077	0.656703	-0.0590612	0.0903656	0.514074	0.734777	Fish_Nuts	871	871	0.0168252	0.570004	0.0822597	0.0516775	0.111798	0.638138	Fish_Nuts	25.6435	34.5986	122.46	374.452	0.0423655	0.0254082	0.599737	0.548681	0.788764	NS	NS	NS
S2_Bifidobacterium animalis	Fish_Nuts	205	205	-0.135461	0.55016	-0.0104224	0.0674053	0.877275	0.942259	Fish_Nuts	126	126	0.0141888	0.575752	-0.0271515	0.194383	0.889147	0.943406	Fish_Nuts	223	223	0.0520077	0.656703	-0.135632	0.136183	0.320381	0.612383	Fish_Nuts	871	871	0.0168252	0.570004	-0.00826243	0.0583939	0.887512	0.994965	Fish_Nuts	220.096	26.4656	53.9203	293.269	0.0410391	-0.0214719	-0.523206	0.600831	0.788764	NS	NS	NS
S22_Mucin degraders	Fish_Nuts	205	205	-0.135461	0.55016	0.0671764	0.0528677	0.205352	0.830217	Fish_Nuts	126	126	0.0141888	0.575752	0.020046	0.0770645	0.795221	0.922457	Fish_Nuts	223	223	0.0520077	0.656703	-0.0345148	0.0551477	0.53208	0.734777	Fish_Nuts	871	871	0.0168252	0.570004	0.00414423	0.0293357	0.88769	0.994965	Fish_Nuts	357.782	168.38	328.81	1162.01	0.0222664	0.0103505	0.464848	0.64204	0.788764	NS	NS	NS
S23_B. hydrogenotrophica	Fish_Nuts	205	205	-0.135461	0.55016	-0.0395978	0.173999	0.820211	0.942259	Fish_Nuts	126	126	0.0141888	0.575752	0.0276035	0.246084	0.910875	0.943406	Fish_Nuts	223	223	0.0520077	0.656703	0.0322687	0.101502	0.750858	0.806477	Fish_Nuts	871	871	0.0168252	0.570004	0.0165301	0.0459861	0.71934	0.993374	Fish_Nuts	33.0297	16.5133	97.0616	472.876	0.0401778	0.0162986	0.405661	0.684992	0.788764	NS	NS	NS
S24_Ruminococcus S24_Ruminococcus gnavus, Lachnospiraceae bacterium 1 1 57FAA, Lachnospiraceae bacterium	Fish_Nuts	205	205	-0.135461	0.55016	-0.0944484	0.15084	0.531942	0.864	Fish_Nuts	126	126	0.0141888	0.575752	0.000817911	0.102069	0.99362	0.99362	Fish_Nuts	223	223	0.0520077	0.656703	0.0572334	0.0300164	0.0579458	0.509322	Fish_Nuts	871	871	0.0168252	0.570004	-0.00964816	0.0178331	0.588635	0.953867	Fish_Nuts	43.9507	95.9871	1109.9	3144.45	0.0150854	0.00662512	0.439175	0.660535	0.788764	NS	NS	NS
S25_Lachnospiraceae bacterium 3 1 57FAA	Fish_Nuts	205	205	-0.135461	0.55016	-0.0908964	0.139854	0.516483	0.864	Fish_Nuts	126	126	0.0141888	0.575752	0.0756081	0.112605	0.503228	0.90773	Fish_Nuts	223	223	0.0520077	0.656703	-0.0827763	0.0685167	0.228317	0.509322	Fish_Nuts	871	871	0.0168252	0.570004	0.0157041	0.0656464	0.81099	0.994965	Fish_Nuts	51.1268	78.8649	213.013	232.048	0.0417009	-0.0220376	-0.528467	0.597175	0.788764	NS	NS	NS
S27_Turicibacter_sanguinis	Fish_Nuts	205	205	-0.135461	0.55016	0.0116816	0.0533787	0.826996	0.942259	Fish_Nuts	126	126	0.0141888	0.575752	-0.121578	0.152254	0.426144	0.90773	Fish_Nuts	223	223	0.0520077	0.656703	-0.0113057	0.0193509	0.559772	0.737882	Fish_Nuts	871	871	0.0168252	0.570004	-0.00179179	0.0379357	0.96234	0.994965	Fish_Nuts	350.965	43.1384	2670.54	694.872	0.0163092	-0.00866663	-0.531394	0.595146	0.788764	NS	NS	NS
S29_Sutterella wadsworthensis	Fish_Nuts	205	205	-0.135461	0.55016	0.0582797	0.114525	0.611429	0.864	Fish_Nuts	126	126	0.0141888	0.575752	-0.0312938	0.0963771	0.746035	0.922457	Fish_Nuts	223	223	0.0520077	0.656703	0.0639563	0.0608996	0.294798	0.610652	Fish_Nuts	871	871	0.0168252	0.570004	0.000594439	0.0208916	0.977307	0.994965	Fish_Nuts	76.2426	107.66	269.632	2291.17	0.0190876	0.00717052	0.375663	0.707167	0.788764	NS	NS	NS
S27_Turicibacter_sanguinis	Bread_Legumes	205	205	-0.0736819	0.691941	-0.0628961	0.0481802	0.193252	0.65795	Bread_Legumes	126	126	0.0277121	0.583927	-0.177547	0.160466	0.270748	0.579322	Bread_Legumes	223	223	-0.116311	0.444079	0.0280587	0.0310763	0.367768	0.860954	Bread_Legumes	871	871	0.0435099	0.579569	0.0405105	0.0412519	0.326378	0.865252	Bread_Legumes	430.788	38.8359	1035.48	587.642	0.0218596	0.00901674	0.412484	0.679985	0.788782	NS	NS	NS
S16_Propionate/succinate producers	Coffee_milk_Soup	205	205	-0.0190486	0.599621	-0.0722629	0.050775	0.156336	0.712566	Coffee_milk_Soup	126	126	0.00261508	0.755444	-0.0400188	0.0756538	0.597802	0.953261	Coffee_milk_Soup	223	223	-0.00397076	0.684592	0.0788749	0.0563354	0.16294	0.735351	Coffee_milk_Soup	871	871	0.00528062	0.524601	-0.0578658	0.0454789	0.203587	0.674534	Coffee_milk_Soup	387.883	174.718	315.092	483.482	0.0271046	-0.0280242	-1.03393	0.30117	0.793994	NS	NS	NS
S19_Streptococci, L. sakei	Coffee_milk_Soup	205	205	-0.0190486	0.599621	0.0324939	0.0440922	0.462079	0.80099	Coffee_milk_Soup	126	126	0.00261508	0.755444	-0.0138879	0.0662871	0.834427	0.953261	Coffee_milk_Soup	223	223	-0.00397076	0.684592	-0.00628778	0.0495952	0.899234	0.93135	Coffee_milk_Soup	871	871	0.00528062	0.524601	-0.049352	0.0277252	0.0754333	0.657113	Coffee_milk_Soup	514.371	227.584	406.556	1300.92	0.0202054	-0.0217218	-1.07505	0.282351	0.793994	NS	NS	NS
S12_Bacteroides finegoldii	Rolls_Spreads	205	205	0.00970005	1.07387	0.0809059	0.179758	0.653142	0.871781	Rolls_Spreads	126	126	0.0143831	0.689611	-0.434173	0.435348	0.320625	0.979653	Rolls_Spreads	223	223	-0.16152	0.433979	-0.309823	0.32376	0.339656	0.695868	Rolls_Spreads	871	871	0.0374261	0.602796	0.21679	0.119618	0.0702788	0.727649	Rolls_Spreads	30.9473	5.27627	9.54012	69.8886	0.0929872	0.10729	1.15382	0.248574	0.795221	NS	NS	NS
S14_Odoribacter	Rolls_Spreads	205	205	0.00970005	1.07387	-0.0234977	0.0757745	0.756837	0.900638	Rolls_Spreads	126	126	0.0143831	0.689611	-0.101958	0.385779	0.79201	0.979653	Rolls_Spreads	223	223	-0.16152	0.433979	-0.101558	0.24084	0.673695	0.849442	Rolls_Spreads	871	871	0.0374261	0.602796	-0.147873	0.109116	0.175712	0.727649	Rolls_Spreads	174.162	6.71928	17.2403	83.9893	0.0595374	-0.0671657	-1.12813	0.259267	0.795221	NS	NS	NS
S17_Alistipes	Rolls_Spreads	205	205	0.00970005	1.07387	0.0307854	0.200448	0.878094	0.958129	Rolls_Spreads	126	126	0.0143831	0.689611	-0.331656	0.382515	0.387651	0.979653	Rolls_Spreads	223	223	-0.16152	0.433979	-0.421655	0.298189	0.15878	0.511626	Rolls_Spreads	871	871	0.0374261	0.602796	-0.181782	0.116485	0.118992	0.727649	Rolls_Spreads	24.8883	6.83442	11.2465	73.6992	0.0925813	-0.168338	-1.81828	0.0690221	0.795221	NS	NS	NS
S18_Lactobacillus delbrueckii	Rolls_Spreads	205	205	0.00970005	1.07387	0.0728467	0.216155	0.736463	0.900638	Rolls_Spreads	126	126	0.0143831	0.689611	-0.488982	0.401759	0.225954	0.979653	Rolls_Spreads	223	223	-0.16152	0.433979	-0.190594	0.282178	0.500117	0.695868	Rolls_Spreads	871	871	0.0374261	0.602796	-0.187051	0.110305	0.0902906	0.727649	Rolls_Spreads	21.4028	6.19538	12.5589	82.1882	0.0904079	-0.157238	-1.73921	0.081998	0.795221	NS	NS	NS
S2_Bifidobacterium animalis	Rolls_Spreads	205	205	0.00970005	1.07387	0.0699472	0.0678614	0.303916	0.62954	Rolls_Spreads	126	126	0.0143831	0.689611	0.0486574	0.43857	0.911845	0.979653	Rolls_Spreads	223	223	-0.16152	0.433979	0.77541	0.448955	0.0855648	0.409099	Rolls_Spreads	871	871	0.0374261	0.602796	-0.00709199	0.131618	0.957041	0.957041	Rolls_Spreads	217.147	5.19903	4.96128	57.7261	0.0592314	0.0662358	1.11826	0.263458	0.795221	NS	NS	NS
S24_Ruminococcus S24_Ruminococcus gnavus, Lachnospiraceae bacterium 1 1 57FAA, Lachnospiraceae bacterium	Rolls_Spreads	205	205	0.00970005	1.07387	-0.235679	0.15212	0.122915	0.62954	Rolls_Spreads	126	126	0.0143831	0.689611	0.0567139	0.234957	0.809687	0.979653	Rolls_Spreads	223	223	-0.16152	0.433979	-0.282831	0.102208	0.00616836	0.178883	Rolls_Spreads	871	871	0.0374261	0.602796	0.00890972	0.0399038	0.823372	0.957041	Rolls_Spreads	43.2144	18.1144	95.7267	628.018	0.0356899	-0.0390236	-1.09341	0.274214	0.795221	NS	NS	NS
S25_Lachnospiraceae bacterium 3 1 57FAA	Rolls_Spreads	205	205	0.00970005	1.07387	-0.19245	0.140657	0.172785	0.62954	Rolls_Spreads	126	126	0.0143831	0.689611	-0.103114	0.254356	0.685912	0.979653	Rolls_Spreads	223	223	-0.16152	0.433979	-0.1866	0.227317	0.412617	0.695868	Rolls_Spreads	871	871	0.0374261	0.602796	-0.0113088	0.147967	0.939096	0.957041	Rolls_Spreads	50.5449	15.4567	19.3524	45.6739	0.0873611	-0.117905	-1.34963	0.177136	0.795221	NS	NS	NS
S3_Faecalibacterium_prausnitzii_Bifidobacterium_bifidum	Rolls_Spreads	205	205	0.00970005	1.07387	0.165452	0.0928268	0.0762203	0.62954	Rolls_Spreads	126	126	0.0143831	0.689611	-0.0218581	0.361084	0.951831	0.979653	Rolls_Spreads	223	223	-0.16152	0.433979	-0.272641	0.21882	0.214135	0.564539	Rolls_Spreads	871	871	0.0374261	0.602796	0.0515959	0.0912658	0.571992	0.902643	Rolls_Spreads	116.052	7.6698	20.8845	120.056	0.0614687	0.0738067	1.20072	0.22986	0.795221	NS	NS	NS
S6_Bifidobacterium_pseudocatenulatum	Rolls_Spreads	205	205	0.00970005	1.07387	0.429095	0.172001	0.0134194	0.389162	Rolls_Spreads	126	126	0.0143831	0.689611	0.0116167	0.454548	0.979653	0.979653	Rolls_Spreads	223	223	-0.16152	0.433979	0.705989	0.313266	0.025218	0.365661	Rolls_Spreads	871	871	0.0374261	0.602796	-0.0587371	0.118517	0.620303	0.902643	Rolls_Spreads	33.8016	4.83994	10.19	71.1928	0.0912778	0.146409	1.604	0.108715	0.795221	NS	NS	NS
S7_Alistipes, Bacteroides	Rolls_Spreads	205	205	0.00970005	1.07387	-0.0718701	0.0616311	0.244956	0.62954	Rolls_Spreads	126	126	0.0143831	0.689611	0.407259	0.136288	0.00340397	0.0987151	Rolls_Spreads	223	223	-0.16152	0.433979	-0.0824242	0.13037	0.5279	0.695868	Rolls_Spreads	871	871	0.0374261	0.602796	-0.0924645	0.0517469	0.0743101	0.727649	Rolls_Spreads	263.269	53.8372	58.8362	373.449	0.0365296	-0.0485405	-1.3288	0.183915	0.795221	NS	NS	NS
S22_Mucin degraders	Dairy_Lean_beef	205	205	-0.201195	0.55624	0.0229769	0.0537673	0.669599	0.943996	Dairy_Lean_beef	126	126	-0.146976	0.56817	-0.0486519	0.0795767	0.542112	0.924779	Dairy_Lean_beef	223	223	0.0254258	0.537627	-0.0392426	0.0720865	0.58675	0.850788	Dairy_Lean_beef	871	871	0.0612162	0.608226	-0.00365039	0.0281842	0.896977	0.896977	Dairy_Lean_beef	345.91	157.917	192.438	1258.89	0.0226157	-0.00607739	-0.268725	0.788141	0.797294	NS	NS	NS
S23_B. hydrogenotrophica	Dairy_Lean_beef	205	205	-0.201195	0.55624	0.0468877	0.176313	0.790565	0.953515	Dairy_Lean_beef	126	126	-0.146976	0.56817	-0.260022	0.249059	0.298575	0.924779	Dairy_Lean_beef	223	223	0.0254258	0.537627	0.240535	0.130787	0.0672611	0.33726	Dairy_Lean_beef	871	871	0.0612162	0.608226	-0.0096299	0.0440231	0.826899	0.856431	Dairy_Lean_beef	32.1685	16.1212	58.4616	515.987	0.0400726	0.0102927	0.256851	0.797294	0.797294	NS	NS	NS
S22_Mucin degraders	Bread_Legumes	205	205	-0.0736819	0.691941	-0.0238569	0.0485398	0.623626	0.910931	Bread_Legumes	126	126	0.0277121	0.583927	0.0396872	0.0809703	0.624934	0.823777	Bread_Legumes	223	223	-0.116311	0.444079	0.0172889	0.0893977	0.846836	0.935336	Bread_Legumes	871	871	0.0435099	0.579569	-0.013348	0.0320998	0.67764	0.916912	Bread_Legumes	424.428	152.528	125.126	970.498	0.0244516	-0.00888631	-0.363425	0.716287	0.798936	NS	NS	NS
S26_Roseburia	Coffee_milk_Soup	205	205	-0.0190486	0.599621	0.0410438	0.128332	0.749444	0.895957	Coffee_milk_Soup	126	126	0.00261508	0.755444	0.0763874	0.0969029	0.432123	0.953261	Coffee_milk_Soup	223	223	-0.00397076	0.684592	-0.0191748	0.0410016	0.640558	0.856802	Coffee_milk_Soup	871	871	0.00528062	0.524601	0.0777705	0.0475803	0.102525	0.657113	Coffee_milk_Soup	60.7196	106.494	594.838	441.718	0.0288223	0.0278905	0.967671	0.333209	0.805255	NS	NS	NS
28_Haemophilus, Veillonella	Cheese_Butter	205	205	-0.0931494	0.425837	-0.107153	0.0618653	0.0851022	0.707868	Cheese_Butter	126	126	-0.00880917	0.675371	0.0140969	0.0354208	0.691443	0.958474	Cheese_Butter	223	223	-0.0538434	0.563146	-0.0239129	0.0236284	0.312747	0.836161	Cheese_Butter	871	871	0.0356952	0.679706	6.85043e-05	0.0140728	0.996117	0.996117	Cheese_Butter	261.28	797.046	1791.15	5049.37	0.0112517	-0.00750069	-0.666628	0.50501	0.807345	NS	NS	NS
S1_Acetate/butyrate producers	Cheese_Butter	205	205	-0.0931494	0.425837	0.0637581	0.0857655	0.458116	0.931457	Cheese_Butter	126	126	-0.00880917	0.675371	0.00883674	0.0407588	0.828738	0.961336	Cheese_Butter	223	223	-0.0538434	0.563146	0.00149885	0.0314745	0.962062	0.976128	Cheese_Butter	871	871	0.0356952	0.679706	0.00773357	0.0117315	0.509935	0.838447	Cheese_Butter	135.949	601.945	1009.45	7265.98	0.0105331	0.00795401	0.755141	0.450164	0.807345	NS	NS	NS
S11_Bacteroides faecis	Cheese_Butter	205	205	-0.0931494	0.425837	-0.127186	0.171986	0.460467	0.931457	Cheese_Butter	126	126	-0.00880917	0.675371	-0.142162	0.177771	0.42547	0.958474	Cheese_Butter	223	223	-0.0538434	0.563146	0.0592833	0.127337	0.641996	0.876842	Cheese_Butter	871	871	0.0356952	0.679706	-0.0201982	0.0481742	0.67512	0.838447	Cheese_Butter	33.8075	31.6429	61.6724	430.894	0.0423327	-0.0248118	-0.586114	0.557799	0.807345	NS	NS	NS
S12_Bacteroides finegoldii	Cheese_Butter	205	205	-0.0931494	0.425837	0.25987	0.226801	0.253251	0.931457	Cheese_Butter	126	126	-0.00880917	0.675371	0.095154	0.164943	0.565093	0.958474	Cheese_Butter	223	223	-0.0538434	0.563146	0.0188549	0.116546	0.871629	0.936194	Cheese_Butter	871	871	0.0356952	0.679706	0.0189054	0.0450178	0.674623	0.838447	Cheese_Butter	19.4407	36.7565	73.6221	493.436	0.040056	0.0309124	0.771731	0.440274	0.807345	NS	NS	NS
S13_Escherichia coli, Bacteroides fragilis	Cheese_Butter	205	205	-0.0931494	0.425837	-0.0215823	0.113071	0.848827	0.944632	Cheese_Butter	126	126	-0.00880917	0.675371	0.0406947	0.0617699	0.511322	0.958474	Cheese_Butter	223	223	-0.0538434	0.563146	0.00113731	0.0379616	0.976128	0.976128	Cheese_Butter	871	871	0.0356952	0.679706	-0.019847	0.0168218	0.238394	0.838447	Cheese_Butter	78.216	262.088	693.921	3533.89	0.0147956	-0.0132156	-0.893216	0.371742	0.807345	NS	NS	NS
S14_Odoribacter	Cheese_Butter	205	205	-0.0931494	0.425837	-0.122555	0.106579	0.251687	0.931457	Cheese_Butter	126	126	-0.00880917	0.675371	0.000139133	0.145804	0.99924	0.99924	Cheese_Butter	223	223	-0.0538434	0.563146	-0.0591351	0.0857521	0.491218	0.876842	Cheese_Butter	871	871	0.0356952	0.679706	-0.027856	0.041026	0.497331	0.838447	Cheese_Butter	88.0352	47.0391	135.991	594.131	0.0339972	-0.0408862	-1.20263	0.229118	0.807345	NS	NS	NS
S16_Propionate/succinate producers	Cheese_Butter	205	205	-0.0931494	0.425837	-0.000358648	0.0637947	0.99552	0.99552	Cheese_Butter	126	126	-0.00880917	0.675371	0.266431	0.0804609	0.0012271	0.0355858	Cheese_Butter	223	223	-0.0538434	0.563146	0.0383911	0.0698115	0.582946	0.876842	Cheese_Butter	871	871	0.0356952	0.679706	-0.0203418	0.0354775	0.566543	0.838447	Cheese_Butter	245.715	154.465	205.185	794.498	0.0267274	0.023418	0.876177	0.380934	0.807345	NS	NS	NS
S17_Alistipes	Cheese_Butter	205	205	-0.0931494	0.425837	-0.197303	0.253238	0.436834	0.931457	Cheese_Butter	126	126	-0.00880917	0.675371	0.234111	0.143397	0.105173	0.958474	Cheese_Butter	223	223	-0.0538434	0.563146	0.219642	0.106576	0.0405051	0.792179	Cheese_Butter	871	871	0.0356952	0.679706	-0.0155483	0.0438184	0.722799	0.838447	Cheese_Butter	15.5934	48.6317	88.0403	520.819	0.0385448	0.0290425	0.753476	0.451164	0.807345	NS	NS	NS
S18_Lactobacillus delbrueckii	Cheese_Butter	205	205	-0.0931494	0.425837	-0.112392	0.273443	0.681496	0.931457	Cheese_Butter	126	126	-0.00880917	0.675371	-0.0533827	0.152656	0.727182	0.958474	Cheese_Butter	223	223	-0.0538434	0.563146	-0.0746818	0.101349	0.461994	0.876842	Cheese_Butter	871	871	0.0356952	0.679706	-0.047589	0.0414758	0.251537	0.838447	Cheese_Butter	13.3742	42.9112	97.3548	581.313	0.0368867	-0.0526954	-1.42857	0.153127	0.807345	NS	NS	NS
S19_Streptococci, L. sakei	Cheese_Butter	205	205	-0.0931494	0.425837	-0.00880963	0.0580227	0.879485	0.944632	Cheese_Butter	126	126	-0.00880917	0.675371	-0.03848	0.0700312	0.583768	0.958474	Cheese_Butter	223	223	-0.0538434	0.563146	0.0362996	0.0612894	0.55431	0.876842	Cheese_Butter	871	871	0.0356952	0.679706	-0.0280235	0.0216835	0.19658	0.838447	Cheese_Butter	297.032	203.9	266.213	2126.88	0.0185887	-0.0208713	-1.12279	0.261525	0.807345	NS	NS	NS
S2_Bifidobacterium animalis	Cheese_Butter	205	205	-0.0931494	0.425837	-0.027094	0.0860664	0.753241	0.931457	Cheese_Butter	126	126	-0.00880917	0.675371	-0.043524	0.165669	0.79322	0.958474	Cheese_Butter	223	223	-0.0538434	0.563146	-0.173447	0.16196	0.285392	0.836161	Cheese_Butter	871	871	0.0356952	0.679706	-0.0525969	0.0494128	0.287427	0.838447	Cheese_Butter	135	36.4348	38.1228	409.564	0.0401895	-0.0539435	-1.34223	0.179522	0.807345	NS	NS	NS
S20_Lactococcus lactis	Cheese_Butter	205	205	-0.0931494	0.425837	-0.058096	0.10946	0.596184	0.931457	Cheese_Butter	126	126	-0.00880917	0.675371	0.0139149	0.130017	0.914948	0.982722	Cheese_Butter	223	223	-0.0538434	0.563146	-0.0227883	0.0581254	0.695427	0.876842	Cheese_Butter	871	871	0.0356952	0.679706	0.0367409	0.0205293	0.0738804	0.838447	Cheese_Butter	83.4619	59.1563	295.984	2372.76	0.01886	0.0271778	1.44103	0.149576	0.807345	NS	NS	NS
S21_Clostridium bolteae, Coprobacillus	Cheese_Butter	205	205	-0.0931494	0.425837	-0.0806231	0.153172	0.599236	0.931457	Cheese_Butter	126	126	-0.00880917	0.675371	0.0350912	0.0447376	0.434536	0.958474	Cheese_Butter	223	223	-0.0538434	0.563146	-0.0550286	0.0320425	0.0874684	0.792179	Cheese_Butter	871	871	0.0356952	0.679706	-0.00710947	0.0113128	0.529885	0.838447	Cheese_Butter	42.6227	499.637	973.974	7813.81	0.0103528	-0.0101877	-0.984055	0.325088	0.807345	NS	NS	NS
S22_Mucin degraders	Cheese_Butter	205	205	-0.0931494	0.425837	0.17523	0.0667003	0.0092886	0.26937	Cheese_Butter	126	126	-0.00880917	0.675371	0.026562	0.0651943	0.684425	0.958474	Cheese_Butter	223	223	-0.0538434	0.563146	0.0615378	0.0651549	0.345997	0.836161	Cheese_Butter	871	871	0.0356952	0.679706	-0.00673426	0.0251749	0.789149	0.880205	Cheese_Butter	224.773	235.277	235.562	1577.84	0.0209728	0.021776	1.0383	0.299132	0.807345	NS	NS	NS
S24_Ruminococcus S24_Ruminococcus gnavus, Lachnospiraceae bacterium 1 1 57FAA, Lachnospiraceae bacterium	Cheese_Butter	205	205	-0.0931494	0.425837	-0.150132	0.192645	0.436725	0.931457	Cheese_Butter	126	126	-0.00880917	0.675371	-0.0304115	0.08648	0.725732	0.958474	Cheese_Butter	223	223	-0.0538434	0.563146	-0.0501564	0.0355196	0.159437	0.792179	Cheese_Butter	871	871	0.0356952	0.679706	-0.0118541	0.0148254	0.424178	0.838447	Cheese_Butter	26.9454	133.712	792.616	4549.77	0.0134803	-0.0184989	-1.37229	0.169973	0.807345	NS	NS	NS
S25_Lachnospiraceae bacterium 3 1 57FAA	Cheese_Butter	205	205	-0.0931494	0.425837	-0.0725426	0.178722	0.685254	0.931457	Cheese_Butter	126	126	-0.00880917	0.675371	-0.0130958	0.0961637	0.891906	0.982722	Cheese_Butter	223	223	-0.0538434	0.563146	-0.0175622	0.0817795	0.830163	0.936194	Cheese_Butter	871	871	0.0356952	0.679706	-0.0438265	0.0555674	0.430498	0.838447	Cheese_Butter	31.3073	108.138	149.524	323.862	0.0403952	-0.0334627	-0.828382	0.407454	0.807345	NS	NS	NS
S26_Roseburia	Cheese_Butter	205	205	-0.0931494	0.425837	-0.224612	0.163766	0.171783	0.931457	Cheese_Butter	126	126	-0.00880917	0.675371	0.133646	0.107607	0.216727	0.958474	Cheese_Butter	223	223	-0.0538434	0.563146	-0.0231514	0.0533921	0.665058	0.876842	Cheese_Butter	871	871	0.0356952	0.679706	-0.0194759	0.0374596	0.603258	0.838447	Cheese_Butter	37.2865	86.3611	350.789	712.644	0.0290242	-0.0158657	-0.546636	0.584629	0.807345	NS	NS	NS
S29_Sutterella wadsworthensis	Cheese_Butter	205	205	-0.0931494	0.425837	-0.125732	0.15165	0.408097	0.931457	Cheese_Butter	126	126	-0.00880917	0.675371	-0.0583157	0.0812834	0.474653	0.958474	Cheese_Butter	223	223	-0.0538434	0.563146	-0.0709028	0.0724766	0.329023	0.836161	Cheese_Butter	871	871	0.0356952	0.679706	-0.0162417	0.0175573	0.355205	0.838447	Cheese_Butter	43.4826	151.355	190.373	3244.02	0.0165994	-0.0221754	-1.33592	0.181576	0.807345	NS	NS	NS
S5_Streptococcus, Bifidobacterium dentium	Cheese_Butter	205	205	-0.0931494	0.425837	-0.0493621	0.0674123	0.464942	0.931457	Cheese_Butter	126	126	-0.00880917	0.675371	0.00235135	0.0540052	0.965351	0.99924	Cheese_Butter	223	223	-0.0538434	0.563146	-0.0314723	0.0224329	0.162263	0.792179	Cheese_Butter	871	871	0.0356952	0.679706	-0.00386316	0.0106511	0.716922	0.838447	Cheese_Butter	220.05	342.869	1987.14	8814.81	0.00938032	-0.00938408	-1.0004	0.317117	0.807345	NS	NS	NS
S6_Bifidobacterium_pseudocatenulatum	Cheese_Butter	205	205	-0.0931494	0.425837	-0.128485	0.220806	0.561299	0.931457	Cheese_Butter	126	126	-0.00880917	0.675371	-0.214316	0.170628	0.211541	0.958474	Cheese_Butter	223	223	-0.0538434	0.563146	0.0643353	0.113763	0.572304	0.876842	Cheese_Butter	871	871	0.0356952	0.679706	-0.0207162	0.0445244	0.641851	0.838447	Cheese_Butter	20.5105	34.3478	77.2676	504.433	0.0396352	-0.0243111	-0.613373	0.53963	0.807345	NS	NS	NS
S8_Eggerthella lenta, Gordonibacter pamelaeae	Cheese_Butter	205	205	-0.0931494	0.425837	0.050137	0.143738	0.727606	0.931457	Cheese_Butter	126	126	-0.00880917	0.675371	-0.0254284	0.0947372	0.788861	0.958474	Cheese_Butter	223	223	-0.0538434	0.563146	-0.0435415	0.0694199	0.531184	0.876842	Cheese_Butter	871	871	0.0356952	0.679706	-0.0140543	0.0286061	0.623339	0.838447	Cheese_Butter	48.4014	111.419	207.507	1222.03	0.0250836	-0.0167466	-0.667634	0.504367	0.807345	NS	NS	NS
S4_Bifidobacterium_catenulatum	Sweetened_tea_yoghurtdrink	205	205	0.111425	1.12755	0.0286887	0.0751259	0.702962	0.927838	Sweetened_tea_yoghurtdrink	126	126	0.0674218	0.540567	-0.0239917	0.112604	0.831639	0.894649	Sweetened_tea_yoghurtdrink	223	223	0.00250442	0.480442	-0.0980534	0.134387	0.4664	0.806662	Sweetened_tea_yoghurtdrink	871	871	-0.0373747	0.434722	-0.0285468	0.0442625	0.519145	0.901398	Sweetened_tea_yoghurtdrink	177.182	78.8672	55.3715	510.42	0.0348824	-0.0204532	-0.586347	0.557642	0.808581	NS	NS	NS
S22_Mucin degraders	Pasta_Pizza	205	205	-0.126846	0.636288	0.082404	0.0486482	0.0918697	0.322418	Pasta_Pizza	126	126	-0.0709619	0.607965	0.0011037	0.0822523	0.989316	0.989316	Pasta_Pizza	223	223	0.00315542	0.506156	-0.0279404	0.0850383	0.742811	0.897563	Pasta_Pizza	871	871	0.0399249	0.617093	0.00446829	0.0312612	0.886376	0.936609	Pasta_Pizza	422.538	147.81	138.284	1023.27	0.0240292	0.0206077	0.857613	0.391106	0.810149	NS	NS	NS
S23_B. hydrogenotrophica	Pasta_Pizza	205	205	-0.126846	0.636288	0.242954	0.159559	0.129431	0.341228	Pasta_Pizza	126	126	-0.0709619	0.607965	0.226502	0.263535	0.391792	0.989316	Pasta_Pizza	223	223	0.00315542	0.506156	0.00388657	0.156504	0.98021	0.98021	Pasta_Pizza	871	871	0.0399249	0.617093	-0.0800294	0.0489932	0.102732	0.438792	Pasta_Pizza	39.2787	14.3987	40.8271	416.609	0.0442325	-0.0398699	-0.90137	0.367392	0.810149	NS	NS	NS
S17_Alistipes	Vegetables_Fruit_Tea	205	205	-0.11222	0.77642	-0.327649	0.139522	0.0198372	0.28764	Vegetables_Fruit_Tea	126	126	-0.000156026	0.675955	0.163785	0.151925	0.283165	0.631676	Vegetables_Fruit_Tea	223	223	0.0418139	0.681131	-0.026154	0.0889003	0.76889	0.958588	Vegetables_Fruit_Tea	871	871	0.0161285	0.690431	0.0021027	0.0423342	0.960398	0.960398	Vegetables_Fruit_Tea	51.3704	43.3256	126.53	557.978	0.035824	-0.0152353	-0.425281	0.670632	0.810347	NS	NS	NS
S4_Bifidobacterium_catenulatum	Pastry_Sweets	205	205	-0.0467602	0.641192	-0.0208306	0.136618	0.878968	0.948574	Pastry_Sweets	126	126	0.0864701	0.764689	0.00486464	0.110556	0.964976	0.985666	Pastry_Sweets	223	223	0.04413	0.575045	-0.0448819	0.125378	0.720712	0.938899	Pastry_Sweets	871	871	-0.0122277	0.629675	-0.0453269	0.0343129	0.186877	0.690133	Pastry_Sweets	53.5775	81.8155	63.6143	849.345	0.0308849	-0.0401309	-1.29937	0.193817	0.811679	NS	NS	NS
S9_Bacteroides, Roseburia	Pastry_Sweets	205	205	-0.0467602	0.641192	-0.0623991	0.0445327	0.162721	0.546219	Pastry_Sweets	126	126	0.0864701	0.764689	-0.142075	0.0609996	0.0215253	0.312116	Pastry_Sweets	223	223	0.04413	0.575045	-0.00737569	0.0471571	0.875858	0.940736	Pastry_Sweets	871	871	-0.0122277	0.629675	-0.00311155	0.0190656	0.870397	0.918301	Pastry_Sweets	504.245	268.748	449.682	2751.06	0.0158636	-0.0205156	-1.29326	0.195923	0.811679	NS	NS	NS
S16_Propionate/succinate producers	Porridge_ready_Fish_fried_Chocolatemilk	205	205	0.0773975	0.762121	0.0483538	0.0392708	0.219752	0.892969	Porridge_ready_Fish_fried_Chocolatemilk	126	126	0.129518	0.829902	0.00950558	0.0699001	0.892059	0.990176	Porridge_ready_Fish_fried_Chocolatemilk	223	223	-0.0295003	0.594099	0.0546912	0.0656401	0.405666	0.786947	Porridge_ready_Fish_fried_Chocolatemilk	871	871	-0.0289628	0.569582	-0.0398201	0.041888	0.342058	0.857665	Porridge_ready_Fish_fried_Chocolatemilk	648.426	204.665	232.093	569.928	0.0245803	0.0140765	0.572675	0.566865	0.821954	NS	NS	NS
28_Haemophilus, Veillonella	Coffee_milk_Soup	205	205	-0.0190486	0.599621	-0.0107009	0.0489607	0.827257	0.895957	Coffee_milk_Soup	126	126	0.00261508	0.755444	-0.00329504	0.0315971	0.917142	0.960461	Coffee_milk_Soup	223	223	-0.00397076	0.684592	-0.0156035	0.019157	0.416328	0.806798	Coffee_milk_Soup	871	871	0.00528062	0.524601	-0.00795738	0.0165451	0.630679	0.914484	Coffee_milk_Soup	417.162	1001.63	2724.86	3653.11	0.0113251	-0.0101774	-0.89866	0.368834	0.822783	NS	NS	NS
S12_Bacteroides finegoldii	Savoury_snacks	205	205	-0.0114351	0.501597	0.164097	0.198805	0.410124	0.976642	Savoury_snacks	126	126	0.0331572	0.582506	-0.0429633	0.197599	0.828245	0.889597	Savoury_snacks	223	223	-0.010086	0.411775	-0.121559	0.159629	0.447181	0.623876	Savoury_snacks	871	871	0.000932337	0.495994	-0.0351817	0.0644471	0.585275	0.847776	Savoury_snacks	25.3013	25.6112	39.2441	240.765	0.0549715	-0.0307912	-0.56013	0.575391	0.824723	NS	NS	NS
S13_Escherichia coli, Bacteroides fragilis	Savoury_snacks	205	205	-0.0114351	0.501597	-0.0183838	0.0989656	0.852831	0.976642	Savoury_snacks	126	126	0.0331572	0.582506	0.106232	0.0735309	0.151232	0.730953	Savoury_snacks	223	223	-0.010086	0.411775	-0.11375	0.051677	0.0288185	0.208934	Savoury_snacks	871	871	0.000932337	0.495994	-0.000791272	0.0243324	0.974065	0.974065	Savoury_snacks	102.101	184.953	374.46	1689.01	0.0206261	-0.0111296	-0.539589	0.589481	0.824723	NS	NS	NS
S14_Odoribacter	Savoury_snacks	205	205	-0.0114351	0.501597	-0.0143817	0.0852116	0.866159	0.976642	Savoury_snacks	126	126	0.0331572	0.582506	-0.183838	0.173655	0.291892	0.816348	Savoury_snacks	223	223	-0.010086	0.411775	0.0233236	0.120887	0.847199	0.847199	Savoury_snacks	871	871	0.000932337	0.495994	0.0534612	0.0591878	0.366648	0.688187	Savoury_snacks	137.722	33.1607	68.4286	285.454	0.0436534	0.016731	0.383269	0.70152	0.824723	NS	NS	NS
S15_Parabacteroides johnsonii	Savoury_snacks	205	205	-0.0114351	0.501597	0.0878584	0.217916	0.687252	0.976642	Savoury_snacks	126	126	0.0331572	0.582506	-0.141828	0.184998	0.444799	0.816348	Savoury_snacks	223	223	-0.010086	0.411775	-0.0279628	0.125501	0.823894	0.847199	Savoury_snacks	871	871	0.000932337	0.495994	0.0687721	0.0645782	0.287199	0.688187	Savoury_snacks	21.0582	29.219	63.4896	239.788	0.0531828	0.0351331	0.660609	0.508863	0.824723	NS	NS	NS
S16_Propionate/succinate producers	Savoury_snacks	205	205	-0.0114351	0.501597	-0.0329506	0.0588938	0.576492	0.976642	Savoury_snacks	126	126	0.0331572	0.582506	-0.0232464	0.100557	0.817571	0.889597	Savoury_snacks	223	223	-0.010086	0.411775	-0.11225	0.0955921	0.241604	0.613312	Savoury_snacks	871	871	0.000932337	0.495994	0.0216234	0.0508885	0.671003	0.853245	Savoury_snacks	288.311	98.8958	109.435	386.154	0.0336566	-0.0178218	-0.52952	0.596445	0.824723	NS	NS	NS
S2_Bifidobacterium animalis	Savoury_snacks	205	205	-0.0114351	0.501597	0.0303674	0.0753116	0.687217	0.976642	Savoury_snacks	126	126	0.0331572	0.582506	0.155548	0.197782	0.433149	0.816348	Savoury_snacks	223	223	-0.010086	0.411775	0.287056	0.221847	0.197062	0.613312	Savoury_snacks	871	871	0.000932337	0.495994	0.00538526	0.0707899	0.939378	0.972927	Savoury_snacks	176.31	25.5639	20.3186	199.553	0.048694	0.0385012	0.790677	0.429133	0.824723	NS	NS	NS
S20_Lactococcus lactis	Savoury_snacks	205	205	-0.0114351	0.501597	-0.0103398	0.0958624	0.914214	0.976642	Savoury_snacks	126	126	0.0331572	0.582506	0.171106	0.154795	0.271209	0.816348	Savoury_snacks	223	223	-0.010086	0.411775	-0.0157983	0.0812188	0.845966	0.847199	Savoury_snacks	871	871	0.000932337	0.495994	-0.0173376	0.0299112	0.562323	0.847776	Savoury_snacks	108.819	41.7337	151.596	1117.72	0.0265385	-0.0110981	-0.418188	0.67581	0.824723	NS	NS	NS
S26_Roseburia	Savoury_snacks	205	205	-0.0114351	0.501597	-0.111	0.143066	0.438768	0.976642	Savoury_snacks	126	126	0.0331572	0.582506	0.0455909	0.131384	0.729211	0.848454	Savoury_snacks	223	223	-0.010086	0.411775	-0.0403743	0.0722422	0.576899	0.690898	Savoury_snacks	871	871	0.000932337	0.495994	-0.0201948	0.0535414	0.706134	0.853245	Savoury_snacks	48.8574	57.9313	191.61	348.836	0.0393069	-0.0271351	-0.69034	0.489981	0.824723	NS	NS	NS
S5_Streptococcus, Bifidobacterium dentium	Savoury_snacks	205	205	-0.0114351	0.501597	0.090166	0.0584519	0.124636	0.903607	Savoury_snacks	126	126	0.0331572	0.582506	0.0293915	0.0683143	0.667871	0.848454	Savoury_snacks	223	223	-0.010086	0.411775	-0.0256969	0.0323951	0.428631	0.623876	Savoury_snacks	871	871	0.000932337	0.495994	-0.0109326	0.0155535	0.482315	0.777062	Savoury_snacks	292.686	214.277	952.886	4133.77	0.0133707	-0.00661307	-0.494595	0.620886	0.824723	NS	NS	NS
S6_Bifidobacterium_pseudocatenulatum	Savoury_snacks	205	205	-0.0114351	0.501597	-0.185647	0.192962	0.337172	0.976642	Savoury_snacks	126	126	0.0331572	0.582506	-0.0219399	0.205496	0.915153	0.915153	Savoury_snacks	223	223	-0.010086	0.411775	0.20358	0.155519	0.191907	0.613312	Savoury_snacks	871	871	0.000932337	0.495994	-0.0560088	0.0637247	0.379689	0.688187	Savoury_snacks	26.857	23.6807	41.346	246.255	0.0543817	-0.0321782	-0.591711	0.554044	0.824723	NS	NS	NS
S7_Alistipes, Bacteroides	Savoury_snacks	205	205	-0.0114351	0.501597	0.0277723	0.0684478	0.685367	0.976642	Savoury_snacks	126	126	0.0331572	0.582506	-0.10692	0.0631182	0.0928656	0.53862	Savoury_snacks	223	223	-0.010086	0.411775	-0.0462545	0.0642116	0.472087	0.623876	Savoury_snacks	871	871	0.000932337	0.495994	0.011068	0.0278806	0.691481	0.853245	Savoury_snacks	213.442	251.01	242.534	1286.45	0.0223974	-0.00897445	-0.400691	0.688648	0.824723	NS	NS	NS
S9_Bacteroides, Roseburia	Savoury_snacks	205	205	-0.0114351	0.501597	0.0351548	0.0534685	0.511631	0.976642	Savoury_snacks	126	126	0.0331572	0.582506	-0.11165	0.0588719	0.0602986	0.53862	Savoury_snacks	223	223	-0.010086	0.411775	-0.0396749	0.0602225	0.510719	0.64395	Savoury_snacks	871	871	0.000932337	0.495994	0.0258738	0.0225852	0.252274	0.688187	Savoury_snacks	349.787	288.526	275.729	1960.43	0.0186518	0.00691153	0.370556	0.710968	0.824723	NS	NS	NS
S14_Odoribacter	Fish_Nuts	205	205	-0.135461	0.55016	-0.0370869	0.0758924	0.625655	0.864	Fish_Nuts	126	126	0.0141888	0.575752	0.11548	0.170715	0.500056	0.90773	Fish_Nuts	223	223	0.0520077	0.656703	0.0623852	0.0906713	0.492204	0.734777	Fish_Nuts	871	871	0.0168252	0.570004	0.00497271	0.0484669	0.918304	0.994965	Fish_Nuts	173.621	34.3128	121.635	425.706	0.0363871	0.00957073	0.263026	0.792531	0.829461	NS	NS	NS
S4_Bifidobacterium_catenulatum	Fish_Nuts	205	205	-0.135461	0.55016	-0.130624	0.146039	0.372166	0.830217	Fish_Nuts	126	126	0.0141888	0.575752	0.0289177	0.103808	0.781054	0.922457	Fish_Nuts	223	223	0.0520077	0.656703	-0.0535253	0.0981898	0.58623	0.73916	Fish_Nuts	871	871	0.0168252	0.570004	0.0191307	0.0329737	0.561952	0.953867	Fish_Nuts	46.8879	92.7987	103.721	919.741	0.0293212	0.00739586	0.252236	0.800859	0.829461	NS	NS	NS
S15_Parabacteroides johnsonii	Eggs_Alcoholic_drinks	205	205	-0.104303	0.43925	0.00219091	0.251392	0.993055	0.993055	Eggs_Alcoholic_drinks	126	126	-0.134042	0.302491	0.261564	0.366851	0.477231	0.934549	Eggs_Alcoholic_drinks	223	223	-0.0546888	0.448173	0.0953977	0.112562	0.397642	0.756933	Eggs_Alcoholic_drinks	871	871	0.0583724	0.606478	0.00198414	0.0537632	0.970569	0.970569	Eggs_Alcoholic_drinks	15.8233	7.43054	78.9258	345.963	0.047238	0.0227472	0.481545	0.630129	0.830625	NS	NS	NS
S14_Odoribacter	Pastry_Sweets	205	205	-0.0467602	0.641192	-0.0449747	0.0701628	0.522321	0.841517	Pastry_Sweets	126	126	0.0864701	0.764689	0.0176634	0.182095	0.922887	0.985666	Pastry_Sweets	223	223	0.04413	0.575045	-0.0229496	0.0965043	0.812265	0.938899	Pastry_Sweets	871	871	-0.0122277	0.629675	-0.0466038	0.0494438	0.346172	0.71707	Pastry_Sweets	203.136	30.1582	107.376	409.05	0.0365217	-0.0401894	-1.10043	0.271146	0.834185	NS	NS	NS
S15_Parabacteroides johnsonii	Pastry_Sweets	205	205	-0.0467602	0.641192	-0.214999	0.181474	0.237536	0.546219	Pastry_Sweets	126	126	0.0864701	0.764689	-0.0257703	0.193555	0.894304	0.985666	Pastry_Sweets	223	223	0.04413	0.575045	0.0862297	0.0980176	0.379975	0.862303	Pastry_Sweets	871	871	-0.0122277	0.629675	0.0611272	0.0544702	0.262083	0.690133	Pastry_Sweets	30.3648	26.6927	104.086	337.041	0.0448028	0.0448858	1.00185	0.316415	0.834185	NS	NS	NS
S19_Streptococci, L. sakei	Pastry_Sweets	205	205	-0.0467602	0.641192	-0.011255	0.0419139	0.788591	0.948574	Pastry_Sweets	126	126	0.0864701	0.764689	0.0582062	0.0899575	0.518917	0.985666	Pastry_Sweets	223	223	0.04413	0.575045	-0.0180693	0.0668497	0.787197	0.938899	Pastry_Sweets	871	871	-0.0122277	0.629675	-0.0343453	0.0262361	0.190865	0.690133	Pastry_Sweets	569.224	123.573	223.769	1452.79	0.020544	-0.0224339	-1.09199	0.274837	0.834185	NS	NS	NS
S7_Alistipes, Bacteroides	Pastry_Sweets	205	205	-0.0467602	0.641192	-0.0398394	0.0571325	0.486419	0.829774	Pastry_Sweets	126	126	0.0864701	0.764689	-0.0858827	0.0662018	0.197021	0.985666	Pastry_Sweets	223	223	0.04413	0.575045	-0.0760681	0.0500276	0.129836	0.818217	Pastry_Sweets	871	871	-0.0122277	0.629675	0.0038475	0.0235201	0.870097	0.918301	Pastry_Sweets	306.361	228.171	399.559	1807.68	0.0190979	-0.0201475	-1.05496	0.291443	0.834185	NS	NS	NS
S16_Propionate/succinate producers	Rolls_Spreads	205	205	0.00970005	1.07387	-0.101463	0.048789	0.0389172	0.564299	Rolls_Spreads	126	126	0.0143831	0.689611	0.00725202	0.222466	0.974049	0.979653	Rolls_Spreads	223	223	-0.16152	0.433979	0.347245	0.196523	0.0786701	0.409099	Rolls_Spreads	871	871	0.0374261	0.602796	0.103556	0.0944574	0.273242	0.727649	Rolls_Spreads	420.103	20.2056	25.8924	112.08	0.0415844	-0.0378373	-0.909891	0.36288	0.835737	NS	NS	NS
S19_Streptococci, L. sakei	Rolls_Spreads	205	205	0.00970005	1.07387	0.0737372	0.0445184	0.099341	0.62954	Rolls_Spreads	126	126	0.0143831	0.689611	-0.348485	0.18595	0.0635031	0.613863	Rolls_Spreads	223	223	-0.16152	0.433979	-0.147805	0.17106	0.388543	0.695868	Rolls_Spreads	871	871	0.0374261	0.602796	0.0135974	0.0574996	0.81312	0.957041	Rolls_Spreads	504.569	28.9205	34.1746	302.462	0.0339007	0.0300975	0.887814	0.374641	0.835737	NS	NS	NS
S23_B. hydrogenotrophica	Rolls_Spreads	205	205	0.00970005	1.07387	0.0770238	0.175571	0.661351	0.871781	Rolls_Spreads	126	126	0.0143831	0.689611	0.365979	0.554224	0.510297	0.979653	Rolls_Spreads	223	223	-0.16152	0.433979	-0.561013	0.334062	0.0945192	0.409099	Rolls_Spreads	871	871	0.0374261	0.602796	0.128766	0.103565	0.214081	0.727649	Rolls_Spreads	32.441	3.25559	8.96078	93.2338	0.0851592	0.0773686	0.908517	0.363605	0.835737	NS	NS	NS
S29_Sutterella wadsworthensis	Fruit_Juice_Milk	205	205	0.0499406	0.971662	0.0318885	0.0659434	0.629249	0.868962	Fruit_Juice_Milk	126	126	0.0470696	0.883709	0.124961	0.0744321	0.0960708	0.928685	Fruit_Juice_Milk	223	223	-0.0460608	0.585582	-0.0561778	0.070671	0.427529	0.958707	Fruit_Juice_Milk	871	871	-0.00752221	0.66348	-0.0168267	0.0184633	0.362374	0.717164	Fruit_Juice_Milk	229.963	180.501	200.225	2933.48	0.0167974	-0.00866783	-0.516021	0.60584	0.836636	NS	NS	NS
S26_Roseburia	Porridge_ready_Fish_fried_Chocolatemilk	205	205	0.0773975	0.762121	-0.140996	0.0968268	0.146956	0.892969	Porridge_ready_Fish_fried_Chocolatemilk	126	126	0.129518	0.829902	0.0993835	0.0922449	0.283524	0.640831	Porridge_ready_Fish_fried_Chocolatemilk	223	223	-0.0295003	0.594099	0.0436495	0.0491983	0.376073	0.786947	Porridge_ready_Fish_fried_Chocolatemilk	871	871	-0.0289628	0.569582	0.00552695	0.0439477	0.89995	0.994502	Porridge_ready_Fish_fried_Chocolatemilk	106.662	117.521	413.143	517.758	0.0294234	0.0151815	0.515966	0.605878	0.836689	NS	NS	NS
S13_Escherichia coli, Bacteroides fragilis	Sugar_Sweets	205	205	0.184389	1.11711	0.0494204	0.0502217	0.326338	0.93287	Sugar_Sweets	126	126	0.0308263	0.62208	-0.0152445	0.0680829	0.823221	0.951887	Sugar_Sweets	223	223	-0.0900997	0.489801	0.116899	0.0469884	0.0136346	0.111693	Sugar_Sweets	871	871	-0.0242716	0.577625	-0.0197365	0.0211034	0.349935	0.879516	Sugar_Sweets	396.477	215.737	452.917	2245.4	0.0173801	0.00753183	0.43336	0.664753	0.838167	NS	NS	NS
S15_Parabacteroides johnsonii	Sugar_Sweets	205	205	0.184389	1.11711	0.00454424	0.11058	0.967262	0.99832	Sugar_Sweets	126	126	0.0308263	0.62208	0.112943	0.168889	0.504946	0.770708	Sugar_Sweets	223	223	-0.0900997	0.489801	-0.127525	0.113707	0.263304	0.506409	Sugar_Sweets	871	871	-0.0242716	0.577625	-0.016429	0.056169	0.76998	0.92303	Sugar_Sweets	81.7796	35.0588	77.3443	316.962	0.0442311	-0.0210105	-0.475017	0.634775	0.838167	NS	NS	NS
S17_Alistipes	Sugar_Sweets	205	205	0.184389	1.11711	0.295803	0.11062	0.00811721	0.0784663	Sugar_Sweets	126	126	0.0308263	0.62208	-0.114675	0.157934	0.469194	0.770708	Sugar_Sweets	223	223	-0.0900997	0.489801	-0.0848263	0.133962	0.527261	0.672929	Sugar_Sweets	871	871	-0.0242716	0.577625	-0.013335	0.0545343	0.806882	0.92303	Sugar_Sweets	81.7204	40.0911	55.7236	336.248	0.0441174	0.0201738	0.457275	0.647473	0.838167	NS	NS	NS
S26_Roseburia	Sugar_Sweets	205	205	0.184389	1.11711	-0.0196551	0.0726522	0.787034	0.93287	Sugar_Sweets	126	126	0.0308263	0.62208	0.118931	0.117376	0.313033	0.703677	Sugar_Sweets	223	223	-0.0900997	0.489801	-0.0379645	0.0638203	0.552633	0.672929	Sugar_Sweets	871	871	-0.0242716	0.577625	0.0459446	0.0462049	0.32033	0.879516	Sugar_Sweets	189.454	72.5835	245.518	468.408	0.0320098	0.0175299	0.547642	0.583938	0.838167	NS	NS	NS
S9_Bacteroides, Roseburia	Sugar_Sweets	205	205	0.184389	1.11711	-0.0140923	0.0271147	0.603833	0.93287	Sugar_Sweets	126	126	0.0308263	0.62208	0.00458634	0.0545116	0.933089	0.951887	Sugar_Sweets	223	223	-0.0900997	0.489801	0.0723065	0.0545487	0.186385	0.506409	Sugar_Sweets	871	871	-0.0242716	0.577625	-0.0150563	0.0196405	0.443533	0.894731	Sugar_Sweets	1360.16	336.529	336.072	2592.35	0.0147041	-0.00699558	-0.475756	0.634248	0.838167	NS	NS	NS
S29_Sutterella wadsworthensis	Dairy_lf	205	205	-0.0789894	0.503158	-0.129891	0.126276	0.30497	0.86268	Dairy_lf	126	126	-0.0346258	0.518191	-0.0594313	0.108063	0.583476	0.769127	Dairy_lf	223	223	0.0070026	0.453292	-0.149524	0.0865468	0.0854702	0.774319	Dairy_lf	871	871	0.0221807	0.682257	-0.0241317	0.0172017	0.161036	0.853164	Dairy_lf	62.7129	85.6342	133.505	3379.56	0.0165263	-0.0313409	-1.89642	0.0579042	0.839611	NS	NS	NS
S11_Bacteroides faecis	Pastry_Sweets	205	205	-0.0467602	0.641192	-0.15041	0.125458	0.231998	0.546219	Pastry_Sweets	126	126	0.0864701	0.764689	0.163528	0.222117	0.46303	0.985666	Pastry_Sweets	223	223	0.04413	0.575045	-0.0273163	0.136672	0.841772	0.938899	Pastry_Sweets	871	871	-0.0122277	0.629675	0.0920054	0.058101	0.113663	0.690133	Pastry_Sweets	63.5335	20.2693	53.535	296.233	0.0480253	0.0450934	0.938952	0.347756	0.840409	NS	NS	NS
S22_Mucin degraders	Pastry_Cream	205	205	-0.0651555	0.556024	-0.0275409	0.053395	0.606576	0.916899	Pastry_Cream	126	126	0.0592037	0.832987	0.192901	0.0604513	0.00181318	0.0251983	Pastry_Cream	223	223	-0.0509842	0.476141	0.0493169	0.0786789	0.531456	0.851995	Pastry_Cream	871	871	0.0200538	0.596495	-0.0124919	0.0293949	0.670966	0.884679	Pastry_Cream	350.75	273.646	161.541	1157.33	0.0226848	0.0188529	0.831084	0.405926	0.840847	NS	NS	NS
S15_Parabacteroides johnsonii	Icecream_Beer_non-alcoholic	205	205	-0.119788	0.542039	-0.0657417	0.194704	0.735983	0.865307	Icecream_Beer_non-alcoholic	126	126	-0.0410161	0.57799	-0.235075	0.177488	0.187867	0.808028	Icecream_Beer_non-alcoholic	223	223	-0.0245111	0.517043	-0.0613673	0.0976916	0.530551	0.855517	Icecream_Beer_non-alcoholic	871	871	0.0407092	0.884625	-0.0146204	0.0340327	0.667595	0.89721	Icecream_Beer_non-alcoholic	26.3786	31.7442	104.782	863.388	0.0312151	-0.027526	-0.881817	0.377876	0.842954	NS	NS	NS
S16_Propionate/succinate producers	Meat_Potatoes_Gravy	205	205	0.0092388	0.66643	0.0489777	0.0483307	0.312177	0.838075	Meat_Potatoes_Gravy	126	126	0.0317397	0.612627	-0.125783	0.108989	0.250754	0.515934	Meat_Potatoes_Gravy	223	223	-0.12186	0.546907	0.0418633	0.0845675	0.621091	0.822655	Meat_Potatoes_Gravy	871	871	0.0247565	0.537179	-0.0101657	0.0506448	0.840961	0.937995	Meat_Potatoes_Gravy	428.109	84.1855	139.828	389.879	0.0309789	0.0117744	0.380077	0.703888	0.850531	NS	NS	NS
28_Haemophilus, Veillonella	Rolls_Spreads	205	205	0.00970005	1.07387	0.129446	0.0872959	0.139991	0.62954	Rolls_Spreads	126	126	0.0143831	0.689611	-0.0692168	0.0954525	0.469961	0.979653	Rolls_Spreads	223	223	-0.16152	0.433979	0.00564772	0.0676984	0.933598	0.933598	Rolls_Spreads	871	871	0.0374261	0.602796	-0.0345871	0.0352064	0.326187	0.727649	Rolls_Spreads	131.224	109.755	218.194	806.782	0.0281055	-0.0136518	-0.485734	0.627156	0.856039	NS	NS	NS
S1_Acetate/butyrate producers	Rolls_Spreads	205	205	0.00970005	1.07387	-0.0381519	0.0678277	0.574421	0.83291	Rolls_Spreads	126	126	0.0143831	0.689611	0.040143	0.107754	0.710163	0.979653	Rolls_Spreads	223	223	-0.16152	0.433979	-0.0889277	0.0873309	0.309682	0.695868	Rolls_Spreads	871	871	0.0374261	0.602796	-0.00395444	0.0313611	0.899687	0.957041	Rolls_Spreads	217.363	86.125	131.119	1016.76	0.0262489	-0.0141358	-0.53853	0.590211	0.856039	NS	NS	NS
S10_Bacteroides eggerthii	Rolls_Spreads	205	205	0.00970005	1.07387	-0.175206	0.160408	0.276044	0.62954	Rolls_Spreads	126	126	0.0143831	0.689611	1.13512	0.513238	0.0288828	0.418801	Rolls_Spreads	223	223	-0.16152	0.433979	0.200472	0.261646	0.444391	0.695868	Rolls_Spreads	871	871	0.0374261	0.602796	-0.0903048	0.123697	0.465557	0.843822	Rolls_Spreads	38.864	3.79631	14.6074	65.3558	0.0903053	-0.0446366	-0.494286	0.621104	0.856039	NS	NS	NS
S11_Bacteroides faecis	Rolls_Spreads	205	205	0.00970005	1.07387	0.14392	0.135739	0.290307	0.62954	Rolls_Spreads	126	126	0.0143831	0.689611	-0.369337	0.470542	0.434048	0.979653	Rolls_Spreads	223	223	-0.16152	0.433979	-0.277745	0.354138	0.433729	0.695868	Rolls_Spreads	871	871	0.0374261	0.602796	-0.148857	0.128148	0.245718	0.727649	Rolls_Spreads	54.2742	4.51652	7.97361	60.8944	0.0885064	-0.0402335	-0.454583	0.649409	0.856039	NS	NS	NS
S13_Escherichia coli, Bacteroides fragilis	Rolls_Spreads	205	205	0.00970005	1.07387	0.0940657	0.0889115	0.291405	0.62954	Rolls_Spreads	126	126	0.0143831	0.689611	0.107678	0.164682	0.514501	0.979653	Rolls_Spreads	223	223	-0.16152	0.433979	-0.156606	0.106258	0.142031	0.511626	Rolls_Spreads	871	871	0.0374261	0.602796	-0.044693	0.045026	0.321183	0.727649	Rolls_Spreads	126.498	36.8728	88.5687	493.258	0.0366323	-0.0269003	-0.734333	0.462746	0.856039	NS	NS	NS
S20_Lactococcus lactis	Rolls_Spreads	205	205	0.00970005	1.07387	0.00783268	0.0865748	0.928002	0.958129	Rolls_Spreads	126	126	0.0143831	0.689611	-0.361398	0.342539	0.293519	0.979653	Rolls_Spreads	223	223	-0.16152	0.433979	-0.0446143	0.169704	0.792897	0.919761	Rolls_Spreads	871	871	0.0374261	0.602796	-0.0340288	0.0550944	0.536984	0.902643	Rolls_Spreads	133.419	8.52277	34.7229	329.447	0.0444505	-0.0292325	-0.657642	0.510769	0.856039	NS	NS	NS
S22_Mucin degraders	Rolls_Spreads	205	205	0.00970005	1.07387	0.0686798	0.0544013	0.208273	0.62954	Rolls_Spreads	126	126	0.0143831	0.689611	-0.0247138	0.173422	0.886921	0.979653	Rolls_Spreads	223	223	-0.16152	0.433979	-0.2286	0.181654	0.209619	0.564539	Rolls_Spreads	871	871	0.0374261	0.602796	-0.0144509	0.0659982	0.826734	0.957041	Rolls_Spreads	337.895	33.25	30.3045	229.581	0.0398084	0.0192376	0.483256	0.628914	0.856039	NS	NS	NS
S27_Turicibacter_sanguinis	Rolls_Spreads	205	205	0.00970005	1.07387	0.0340194	0.0538324	0.528145	0.806116	Rolls_Spreads	126	126	0.0143831	0.689611	-0.194484	0.34396	0.57284	0.979653	Rolls_Spreads	223	223	-0.16152	0.433979	-0.0212679	0.0663934	0.749082	0.905141	Rolls_Spreads	871	871	0.0374261	0.602796	0.0697984	0.086361	0.419202	0.810456	Rolls_Spreads	345.074	8.45249	226.856	134.08	0.0374119	0.0204757	0.547305	0.584169	0.856039	NS	NS	NS
S4_Bifidobacterium_catenulatum	Rolls_Spreads	205	205	0.00970005	1.07387	-0.113193	0.147488	0.44371	0.756918	Rolls_Spreads	126	126	0.0143831	0.689611	-0.0163217	0.234276	0.944573	0.979653	Rolls_Spreads	223	223	-0.16152	0.433979	-0.0442199	0.325386	0.892026	0.933598	Rolls_Spreads	871	871	0.0374261	0.602796	0.0875088	0.0753731	0.245978	0.727649	Rolls_Spreads	45.9711	18.2199	9.44502	176.022	0.0632888	0.0379913	0.600284	0.548317	0.856039	NS	NS	NS
28_Haemophilus, Veillonella	Pastry_Sweets	205	205	-0.0467602	0.641192	0.00508668	0.0480766	0.915864	0.948574	Pastry_Sweets	126	126	0.0864701	0.764689	0.00465112	0.0466376	0.920748	0.985666	Pastry_Sweets	223	223	0.04413	0.575045	0.0294062	0.0261319	0.261817	0.843631	Pastry_Sweets	871	871	-0.0122277	0.629675	-0.0199121	0.0158139	0.208333	0.690133	Pastry_Sweets	432.645	459.756	1464.4	3998.75	0.0125436	-0.0050699	-0.404181	0.68608	0.858133	NS	NS	NS
S1_Acetate/butyrate producers	Pastry_Sweets	205	205	-0.0467602	0.641192	-0.0906974	0.0624594	0.148048	0.546219	Pastry_Sweets	126	126	0.0864701	0.764689	-0.0105436	0.0521941	0.840262	0.985666	Pastry_Sweets	223	223	0.04413	0.575045	-0.0325751	0.0336689	0.334369	0.862303	Pastry_Sweets	871	871	-0.0122277	0.629675	0.0158253	0.01424	0.26674	0.690133	Pastry_Sweets	256.333	367.076	882.152	4931.48	0.012464	0.00344676	0.276538	0.782135	0.858133	NS	NS	NS
S10_Bacteroides eggerthii	Pastry_Sweets	205	205	-0.0467602	0.641192	-0.0231007	0.14881	0.876793	0.948574	Pastry_Sweets	126	126	0.0864701	0.764689	-0.257968	0.245959	0.296366	0.985666	Pastry_Sweets	223	223	0.04413	0.575045	-0.168776	0.100328	0.093959	0.818217	Pastry_Sweets	871	871	-0.0122277	0.629675	0.0257817	0.0561307	0.646124	0.892266	Pastry_Sweets	45.1581	16.5301	99.3479	317.394	0.0457184	-0.0290367	-0.63512	0.52535	0.858133	NS	NS	NS
S12_Bacteroides finegoldii	Pastry_Sweets	205	205	-0.0467602	0.641192	-0.201676	0.165743	0.22512	0.546219	Pastry_Sweets	126	126	0.0864701	0.764689	0.0719299	0.206186	0.727806	0.985666	Pastry_Sweets	223	223	0.04413	0.575045	-0.0257184	0.125034	0.837225	0.938899	Pastry_Sweets	871	871	-0.0122277	0.629675	-0.0296	0.0543635	0.586249	0.850062	Pastry_Sweets	36.4024	23.5225	63.9649	338.365	0.0465114	-0.0374474	-0.805122	0.420749	0.858133	NS	NS	NS
S13_Escherichia coli, Bacteroides fragilis	Pastry_Sweets	205	205	-0.0467602	0.641192	-0.0665573	0.0843139	0.430858	0.78093	Pastry_Sweets	126	126	0.0864701	0.764689	0.0163888	0.0779682	0.833881	0.985666	Pastry_Sweets	223	223	0.04413	0.575045	0.0404623	0.041081	0.325793	0.862303	Pastry_Sweets	871	871	-0.0122277	0.629675	-0.00289935	0.0203312	0.886635	0.918301	Pastry_Sweets	140.67	164.5	592.542	2419.21	0.0173633	0.00310371	0.178751	0.858133	0.858133	NS	NS	NS
S16_Propionate/succinate producers	Pastry_Sweets	205	205	-0.0467602	0.641192	0.0686838	0.046127	0.138159	0.546219	Pastry_Sweets	126	126	0.0864701	0.764689	0.0260326	0.104955	0.804531	0.985666	Pastry_Sweets	223	223	0.04413	0.575045	0.0484029	0.0757382	0.523456	0.862303	Pastry_Sweets	871	871	-0.0122277	0.629675	-0.0457841	0.0428469	0.285572	0.690133	Pastry_Sweets	469.991	90.7804	174.329	544.704	0.027953	0.0141766	0.507159	0.612043	0.858133	NS	NS	NS
S17_Alistipes	Pastry_Sweets	205	205	-0.0467602	0.641192	0.00758635	0.185422	0.967405	0.967405	Pastry_Sweets	126	126	0.0864701	0.764689	0.481491	0.175658	0.00706057	0.204756	Pastry_Sweets	223	223	0.04413	0.575045	0.082416	0.115321	0.475582	0.862303	Pastry_Sweets	871	871	-0.0122277	0.629675	-0.0382048	0.0529067	0.470417	0.850062	Pastry_Sweets	29.0856	32.409	75.1944	357.256	0.0449946	0.0169525	0.376768	0.706346	0.858133	NS	NS	NS
S18_Lactobacillus delbrueckii	Pastry_Sweets	205	205	-0.0467602	0.641192	-0.279129	0.199016	0.162309	0.546219	Pastry_Sweets	126	126	0.0864701	0.764689	-0.0746795	0.190635	0.695944	0.985666	Pastry_Sweets	223	223	0.04413	0.575045	-0.151287	0.108386	0.164197	0.818217	Pastry_Sweets	871	871	-0.0122277	0.629675	0.0669228	0.0500761	0.181763	0.690133	Pastry_Sweets	25.2479	27.5167	85.1246	398.786	0.0431663	0.00877117	0.203195	0.838983	0.858133	NS	NS	NS
S20_Lactococcus lactis	Pastry_Sweets	205	205	-0.0467602	0.641192	0.0196319	0.0800699	0.806566	0.948574	Pastry_Sweets	126	126	0.0864701	0.764689	-0.0679864	0.162273	0.675992	0.985666	Pastry_Sweets	223	223	0.04413	0.575045	0.0527604	0.063781	0.409084	0.862303	Pastry_Sweets	871	871	-0.0122277	0.629675	0.0141673	0.0253001	0.575657	0.850062	Pastry_Sweets	155.977	37.9758	245.82	1562.26	0.0223493	0.0177733	0.795252	0.426467	0.858133	NS	NS	NS
S22_Mucin degraders	Pastry_Sweets	205	205	-0.0467602	0.641192	-0.106598	0.0493878	0.0321069	0.46555	Pastry_Sweets	126	126	0.0864701	0.764689	0.00743097	0.0818943	0.927853	0.985666	Pastry_Sweets	223	223	0.04413	0.575045	0.000877433	0.0712501	0.990186	0.990186	Pastry_Sweets	871	871	-0.0122277	0.629675	0.0481057	0.0299697	0.10883	0.690133	Pastry_Sweets	409.978	149.105	196.983	1113.36	0.0231284	0.00595731	0.257575	0.796735	0.858133	NS	NS	NS
S23_B. hydrogenotrophica	Pastry_Sweets	205	205	-0.0467602	0.641192	-0.209	0.161802	0.197958	0.546219	Pastry_Sweets	126	126	0.0864701	0.764689	-0.349921	0.260058	0.180985	0.985666	Pastry_Sweets	223	223	0.04413	0.575045	-0.0723911	0.129495	0.57672	0.880257	Pastry_Sweets	871	871	-0.0122277	0.629675	0.0276624	0.0470193	0.556471	0.850062	Pastry_Sweets	38.1972	14.7863	59.6342	452.322	0.0420726	-0.0087831	-0.208761	0.834635	0.858133	NS	NS	NS
S24_Ruminococcus S24_Ruminococcus gnavus, Lachnospiraceae bacterium 1 1 57FAA, Lachnospiraceae bacterium	Pastry_Sweets	205	205	-0.0467602	0.641192	0.434743	0.137607	0.00183059	0.053087	Pastry_Sweets	126	126	0.0864701	0.764689	0.138018	0.113919	0.228147	0.985666	Pastry_Sweets	223	223	0.04413	0.575045	-0.06144	0.0389513	0.116249	0.818217	Pastry_Sweets	871	871	-0.0122277	0.629675	-0.00707451	0.0179522	0.693626	0.913518	Pastry_Sweets	52.8106	77.0567	659.107	3102.88	0.0160296	-0.00741358	-0.462494	0.643727	0.858133	NS	NS	NS
S25_Lachnospiraceae bacterium 3 1 57FAA	Pastry_Sweets	205	205	-0.0467602	0.641192	-0.0170528	0.130711	0.896333	0.948574	Pastry_Sweets	126	126	0.0864701	0.764689	-0.0737827	0.119924	0.539556	0.985666	Pastry_Sweets	223	223	0.04413	0.575045	0.0278091	0.0877282	0.751555	0.938899	Pastry_Sweets	871	871	-0.0122277	0.629675	-0.0236655	0.0671271	0.724514	0.913518	Pastry_Sweets	58.53	69.533	129.934	221.924	0.0456473	-0.016184	-0.354544	0.722931	0.858133	NS	NS	NS
S26_Roseburia	Pastry_Sweets	205	205	-0.0467602	0.641192	-0.194796	0.118837	0.102787	0.546219	Pastry_Sweets	126	126	0.0864701	0.764689	-0.00242467	0.134669	0.985666	0.985666	Pastry_Sweets	223	223	0.04413	0.575045	0.0183571	0.0605859	0.762224	0.938899	Pastry_Sweets	871	871	-0.0122277	0.629675	0.0307276	0.045198	0.496789	0.850062	Pastry_Sweets	70.8101	55.1393	272.432	489.51	0.0335599	0.00688742	0.205228	0.837394	0.858133	NS	NS	NS
S3_Faecalibacterium_prausnitzii_Bifidobacterium_bifidum	Pastry_Sweets	205	205	-0.0467602	0.641192	-0.043611	0.0866785	0.615429	0.934575	Pastry_Sweets	126	126	0.0864701	0.764689	0.0497523	0.171378	0.772087	0.985666	Pastry_Sweets	223	223	0.04413	0.575045	0.10549	0.0846238	0.213907	0.843631	Pastry_Sweets	871	871	-0.0122277	0.629675	-0.0083277	0.0414054	0.840647	0.918301	Pastry_Sweets	133.1	34.0477	139.642	583.293	0.0335185	0.00647438	0.193158	0.846835	0.858133	NS	NS	NS
S6_Bifidobacterium_pseudocatenulatum	Pastry_Sweets	205	205	-0.0467602	0.641192	0.0628095	0.161506	0.697767	0.934575	Pastry_Sweets	126	126	0.0864701	0.764689	0.136832	0.214138	0.524046	0.985666	Pastry_Sweets	223	223	0.04413	0.575045	-0.0983273	0.121961	0.420999	0.862303	Pastry_Sweets	871	871	-0.0122277	0.629675	0.0152093	0.0537756	0.777376	0.918301	Pastry_Sweets	38.3375	21.8079	67.2292	345.803	0.0459714	0.00853997	0.185767	0.852627	0.858133	NS	NS	NS
S8_Eggerthella lenta, Gordonibacter pamelaeae	Pastry_Sweets	205	205	-0.0467602	0.641192	0.100704	0.104766	0.337616	0.652724	Pastry_Sweets	126	126	0.0864701	0.764689	0.0469656	0.119272	0.694476	0.985666	Pastry_Sweets	223	223	0.04413	0.575045	-0.103884	0.0753241	0.169286	0.818217	Pastry_Sweets	871	871	-0.0122277	0.629675	-0.00220979	0.0345892	0.949075	0.949075	Pastry_Sweets	91.1078	70.2943	176.251	835.831	0.0291918	-0.00654484	-0.224201	0.822601	0.858133	NS	NS	NS
S19_Streptococci, L. sakei	Vegetables_Fruit_Tea	205	205	-0.11222	0.77642	0.0249245	0.0317755	0.433808	0.82677	Vegetables_Fruit_Tea	126	126	-0.000156026	0.675955	-0.0157675	0.0754209	0.834778	0.928763	Vegetables_Fruit_Tea	223	223	0.0418139	0.681131	-0.0349476	0.0506417	0.490897	0.955139	Vegetables_Fruit_Tea	871	871	0.0161285	0.690431	-0.0123029	0.0208087	0.554519	0.756174	Vegetables_Fruit_Tea	990.409	175.799	389.927	2309.47	0.0160839	-0.00520661	-0.323716	0.746153	0.858829	NS	NS	NS
S4_Bifidobacterium_catenulatum	Vegetables_Fruit_Tea	205	205	-0.11222	0.77642	0.0943159	0.104005	0.365589	0.82677	Vegetables_Fruit_Tea	126	126	-0.000156026	0.675955	-0.0668499	0.0930077	0.473689	0.808057	Vegetables_Fruit_Tea	223	223	0.0418139	0.681131	-0.107695	0.0963109	0.264716	0.813179	Vegetables_Fruit_Tea	871	871	0.0161285	0.690431	0.0161268	0.0274552	0.557107	0.756174	Vegetables_Fruit_Tea	92.4463	115.601	107.808	1326.63	0.0246745	0.00656031	0.265874	0.790337	0.858829	NS	NS	NS
S5_Streptococcus, Bifidobacterium dentium	Vegetables_Fruit_Tea	205	205	-0.11222	0.77642	0.00857503	0.0375703	0.819711	0.860185	Vegetables_Fruit_Tea	126	126	-0.000156026	0.675955	-0.026973	0.0573743	0.639207	0.885561	Vegetables_Fruit_Tea	223	223	0.0418139	0.681131	0.0117255	0.0193529	0.545318	0.955139	Vegetables_Fruit_Tea	871	871	0.0161285	0.690431	-0.00625873	0.0103796	0.546688	0.756174	Vegetables_Fruit_Tea	708.454	303.784	2669.98	9281.94	0.0087827	-0.00222962	-0.253865	0.799599	0.858829	NS	NS	NS
S21_Clostridium bolteae, Coprobacillus	Fish_Nuts	205	205	-0.135461	0.55016	-0.0937547	0.116154	0.420552	0.864	Fish_Nuts	126	126	0.0141888	0.575752	-0.0790935	0.0554841	0.156892	0.810424	Fish_Nuts	223	223	0.0520077	0.656703	0.0336752	0.0269669	0.21322	0.509322	Fish_Nuts	871	871	0.0168252	0.570004	-0.00519959	0.0135239	0.700725	0.993374	Fish_Nuts	74.1199	324.835	1375.11	5467.63	0.0117511	-0.00203872	-0.173492	0.862265	0.862265	NS	NS	NS
S11_Bacteroides faecis	Dairy_Cereals	205	205	-0.161259	0.558239	-0.0439473	0.139689	0.753389	0.873931	Dairy_Cereals	126	126	-0.0521211	0.621192	0.070511	0.191761	0.713742	0.958129	Dairy_Cereals	223	223	-0.0111794	0.671357	-0.0188012	0.11075	0.865356	0.919942	Dairy_Cereals	871	871	0.0462207	0.622802	-0.0313401	0.0531104	0.555283	0.739579	Dairy_Cereals	51.2477	27.1945	81.5288	354.52	0.0440871	-0.0252253	-0.57217	0.567207	0.865737	NS	NS	NS
S17_Alistipes	Dairy_Cereals	205	205	-0.161259	0.558239	-0.169945	0.205412	0.409038	0.659005	Dairy_Cereals	126	126	-0.0521211	0.621192	0.0668386	0.155943	0.668976	0.958129	Dairy_Cereals	223	223	-0.0111794	0.671357	-0.0191487	0.0935466	0.838001	0.919942	Dairy_Cereals	871	871	0.0462207	0.622802	0.0432897	0.0482942	0.370302	0.572654	Dairy_Cereals	23.7	41.1213	114.273	428.756	0.0405604	0.0248307	0.612192	0.540411	0.865737	NS	NS	NS
S29_Sutterella wadsworthensis	Rolls_Spreads	205	205	0.00970005	1.07387	-0.0107582	0.116783	0.9267	0.958129	Rolls_Spreads	126	126	0.0143831	0.689611	-0.153633	0.215817	0.47808	0.979653	Rolls_Spreads	223	223	-0.16152	0.433979	0.130044	0.202001	0.520401	0.695868	Rolls_Spreads	871	871	0.0374261	0.602796	0.021078	0.0469571	0.653638	0.902643	Rolls_Spreads	73.3226	21.4699	24.507	453.522	0.0417821	0.0151164	0.361792	0.717507	0.866988	NS	NS	NS
S9_Bacteroides, Roseburia	Rolls_Spreads	205	205	0.00970005	1.07387	0.0319748	0.0482533	0.50833	0.806116	Rolls_Spreads	126	126	0.0143831	0.689611	0.192261	0.130983	0.144765	0.979653	Rolls_Spreads	223	223	-0.16152	0.433979	-0.0117464	0.122357	0.923608	0.933598	Rolls_Spreads	871	871	0.0374261	0.602796	-0.0202554	0.0420181	0.629882	0.902643	Rolls_Spreads	429.482	58.2869	66.7949	566.404	0.0298678	0.011313	0.37877	0.704859	0.866988	NS	NS	NS
S14_Odoribacter	Pasta_Pizza	205	205	-0.126846	0.636288	-0.0154333	0.0697666	0.825173	0.941549	Pasta_Pizza	126	126	-0.0709619	0.607965	-0.159998	0.183142	0.384065	0.989316	Pasta_Pizza	223	223	0.00315542	0.506156	-0.140026	0.113868	0.220206	0.550438	Pasta_Pizza	871	871	0.0399249	0.617093	0.088977	0.0516446	0.0852724	0.438792	Pasta_Pizza	205.449	29.8144	77.125	374.93	0.0381435	0.0212706	0.557648	0.577085	0.870034	NS	NS	NS
S16_Propionate/succinate producers	Pasta_Pizza	205	205	-0.126846	0.636288	0.0192014	0.0604228	0.751002	0.907461	Pasta_Pizza	126	126	-0.0709619	0.607965	-0.0237011	0.105895	0.82328	0.989316	Pasta_Pizza	223	223	0.00315542	0.506156	-0.0994129	0.0903072	0.272213	0.550438	Pasta_Pizza	871	871	0.0399249	0.617093	-0.0185523	0.0447126	0.678301	0.936609	Pasta_Pizza	273.904	89.1768	122.618	500.197	0.0318482	-0.018586	-0.583582	0.559501	0.870034	NS	NS	NS
S18_Lactobacillus delbrueckii	Pasta_Pizza	205	205	-0.126846	0.636288	-0.125424	0.197343	0.525791	0.726093	Pasta_Pizza	126	126	-0.0709619	0.607965	-0.143067	0.192011	0.457669	0.989316	Pasta_Pizza	223	223	0.00315542	0.506156	-0.0185362	0.131479	0.888015	0.953794	Pasta_Pizza	871	871	0.0399249	0.617093	-0.00568629	0.0523018	0.913449	0.936609	Pasta_Pizza	25.6777	27.1236	57.8482	365.567	0.0458245	-0.0215282	-0.469797	0.6385	0.870034	NS	NS	NS
S19_Streptococci, L. sakei	Pasta_Pizza	205	205	-0.126846	0.636288	-0.0667589	0.0407439	0.103008	0.322418	Pasta_Pizza	126	126	-0.0709619	0.607965	-0.114053	0.103731	0.273884	0.989316	Pasta_Pizza	223	223	0.00315542	0.506156	-0.0134341	0.0806222	0.867821	0.953794	Pasta_Pizza	871	871	0.0399249	0.617093	0.0231454	0.027191	0.394894	0.880917	Pasta_Pizza	602.385	92.9351	153.848	1352.54	0.0213118	-0.00979961	-0.459821	0.645645	0.870034	NS	NS	NS
S20_Lactococcus lactis	Pasta_Pizza	205	205	-0.126846	0.636288	-0.0295456	0.0790719	0.709059	0.89403	Pasta_Pizza	126	126	-0.0709619	0.607965	-0.0513479	0.16377	0.754418	0.989316	Pasta_Pizza	223	223	0.00315542	0.506156	0.0524378	0.0768565	0.495835	0.670772	Pasta_Pizza	871	871	0.0399249	0.617093	0.0107549	0.0259915	0.679142	0.936609	Pasta_Pizza	159.939	37.2845	169.293	1480.26	0.0232698	0.00983194	0.422519	0.672647	0.870034	NS	NS	NS
S24_Ruminococcus S24_Ruminococcus gnavus, Lachnospiraceae bacterium 1 1 57FAA, Lachnospiraceae bacterium	Pasta_Pizza	205	205	-0.126846	0.636288	-0.221516	0.138439	0.111179	0.322418	Pasta_Pizza	126	126	-0.0709619	0.607965	0.00449448	0.109194	0.967239	0.989316	Pasta_Pizza	223	223	0.00315542	0.506156	-0.00122861	0.0471174	0.979222	0.98021	Pasta_Pizza	871	871	0.0399249	0.617093	-0.00463447	0.0187731	0.805071	0.936609	Pasta_Pizza	52.1774	83.8689	450.441	2837.45	0.0170898	-0.00726786	-0.425275	0.670637	0.870034	NS	NS	NS
S3_Faecalibacterium_prausnitzii_Bifidobacterium_bifidum	Pasta_Pizza	205	205	-0.126846	0.636288	-0.00128817	0.0854717	0.98799	0.98799	Pasta_Pizza	126	126	-0.0709619	0.607965	-0.235267	0.169876	0.168663	0.989316	Pasta_Pizza	223	223	0.00315542	0.506156	-0.0894176	0.101987	0.381599	0.614799	Pasta_Pizza	871	871	0.0399249	0.617093	0.0104878	0.043198	0.80823	0.936609	Pasta_Pizza	136.885	34.6526	96.1409	535.885	0.0352769	-0.0140691	-0.398819	0.690027	0.870034	NS	NS	NS
S4_Bifidobacterium_catenulatum	Pasta_Pizza	205	205	-0.126846	0.636288	-0.01543	0.134946	0.909082	0.941549	Pasta_Pizza	126	126	-0.0709619	0.607965	-0.0632092	0.111392	0.571469	0.989316	Pasta_Pizza	223	223	0.00315542	0.506156	0.209681	0.150795	0.1658	0.534243	Pasta_Pizza	871	871	0.0399249	0.617093	-0.0334313	0.036195	0.355945	0.8602	Pasta_Pizza	54.9138	80.5923	43.9772	763.315	0.032568	-0.0235882	-0.724275	0.468897	0.870034	NS	NS	NS
S5_Streptococcus, Bifidobacterium dentium	Pasta_Pizza	205	205	-0.126846	0.636288	-0.0320707	0.0481921	0.50657	0.726093	Pasta_Pizza	126	126	-0.0709619	0.607965	-0.0876299	0.0788628	0.268941	0.989316	Pasta_Pizza	223	223	0.00315542	0.506156	0.00770604	0.0283335	0.785936	0.911685	Pasta_Pizza	871	871	0.0399249	0.617093	-0.00496582	0.0136084	0.715274	0.936609	Pasta_Pizza	430.574	160.789	1245.66	5399.93	0.011755	-0.00623394	-0.530323	0.595888	0.870034	NS	NS	NS
S11_Bacteroides faecis	Porridge_ready_Fish_fried_Chocolatemilk	205	205	0.0773975	0.762121	0.0361028	0.0973048	0.711012	0.892969	Porridge_ready_Fish_fried_Chocolatemilk	126	126	0.129518	0.829902	-0.0024263	0.148237	0.986968	0.999579	Porridge_ready_Fish_fried_Chocolatemilk	223	223	-0.0295003	0.594099	0.130725	0.119365	0.274655	0.786947	Porridge_ready_Fish_fried_Chocolatemilk	871	871	-0.0289628	0.569582	-0.0129674	0.0568969	0.81977	0.994502	Porridge_ready_Fish_fried_Chocolatemilk	105.617	45.5082	70.1853	308.903	0.0434285	0.0167328	0.385295	0.700019	0.870439	NS	NS	NS
S20_Lactococcus lactis	Porridge_ready_Fish_fried_Chocolatemilk	205	205	0.0773975	0.762121	0.0149006	0.0619006	0.810022	0.892969	Porridge_ready_Fish_fried_Chocolatemilk	126	126	0.129518	0.829902	-0.115035	0.107622	0.287269	0.640831	Porridge_ready_Fish_fried_Chocolatemilk	223	223	-0.0295003	0.594099	0.0678867	0.0546016	0.215181	0.786947	Porridge_ready_Fish_fried_Chocolatemilk	871	871	-0.0289628	0.569582	-0.00307624	0.0245314	0.900238	0.994502	Porridge_ready_Fish_fried_Chocolatemilk	260.982	86.3367	335.42	1661.71	0.0206529	0.00495459	0.239898	0.810409	0.870439	NS	NS	NS
S21_Clostridium bolteae, Coprobacillus	Porridge_ready_Fish_fried_Chocolatemilk	205	205	0.0773975	0.762121	0.0288949	0.0839242	0.730991	0.892969	Porridge_ready_Fish_fried_Chocolatemilk	126	126	0.129518	0.829902	-0.037686	0.0404582	0.353683	0.683787	Porridge_ready_Fish_fried_Chocolatemilk	223	223	-0.0295003	0.594099	0.0318286	0.0296944	0.285075	0.786947	Porridge_ready_Fish_fried_Chocolatemilk	871	871	-0.0289628	0.569582	0.00125342	0.0135805	0.926486	0.994502	Porridge_ready_Fish_fried_Chocolatemilk	141.979	610.924	1134.1	5422.08	0.0116968	0.00327979	0.2804	0.779171	0.870439	NS	NS	NS
S22_Mucin degraders	Porridge_ready_Fish_fried_Chocolatemilk	205	205	0.0773975	0.762121	-0.0468679	0.0383124	0.222674	0.892969	Porridge_ready_Fish_fried_Chocolatemilk	126	126	0.129518	0.829902	0.0684232	0.0539439	0.207126	0.640831	Porridge_ready_Fish_fried_Chocolatemilk	223	223	-0.0295003	0.594099	-0.00643985	0.0614634	0.916653	0.949391	Porridge_ready_Fish_fried_Chocolatemilk	871	871	-0.0289628	0.569582	-0.00208097	0.0293397	0.943472	0.994502	Porridge_ready_Fish_fried_Chocolatemilk	681.274	343.649	264.708	1161.69	0.0201976	-0.00511497	-0.253246	0.800078	0.870439	NS	NS	NS
S4_Bifidobacterium_catenulatum	Porridge_ready_Fish_fried_Chocolatemilk	205	205	0.0773975	0.762121	0.0282053	0.105604	0.789679	0.892969	Porridge_ready_Fish_fried_Chocolatemilk	126	126	0.129518	0.829902	0.0218246	0.0735906	0.767309	0.927165	Porridge_ready_Fish_fried_Chocolatemilk	223	223	-0.0295003	0.594099	0.0371223	0.109797	0.735615	0.880971	Porridge_ready_Fish_fried_Chocolatemilk	871	871	-0.0289628	0.569582	-0.0264767	0.0345438	0.44362	0.857665	Porridge_ready_Fish_fried_Chocolatemilk	89.6689	184.652	82.9509	838.032	0.0289242	-0.0104993	-0.362994	0.716609	0.870439	NS	NS	NS
S8_Eggerthella lenta, Gordonibacter pamelaeae	Porridge_ready_Fish_fried_Chocolatemilk	205	205	0.0773975	0.762121	0.0387871	0.0812175	0.633486	0.892969	Porridge_ready_Fish_fried_Chocolatemilk	126	126	0.129518	0.829902	-0.0912377	0.0781791	0.24559	0.640831	Porridge_ready_Fish_fried_Chocolatemilk	223	223	-0.0295003	0.594099	-0.0340709	0.0652326	0.602002	0.864192	Porridge_ready_Fish_fried_Chocolatemilk	871	871	-0.0289628	0.569582	0.0338133	0.034062	0.32114	0.857665	Porridge_ready_Fish_fried_Chocolatemilk	151.6	163.613	235.002	861.908	0.0266111	0.00856131	0.321719	0.747666	0.870439	NS	NS	NS
S5_Streptococcus, Bifidobacterium dentium	Fastfood	205	205	0.059247	0.613728	0.0418896	0.0706017	0.553686	0.744536	Fastfood	126	126	0.0181697	0.719587	0.0180322	0.0915084	0.844151	0.996213	Fastfood	223	223	-0.0641103	0.381483	-0.00235728	0.0427541	0.956088	0.990234	Fastfood	871	871	8.79047e-06	0.532809	-0.0207675	0.0197387	0.293058	0.566579	Fastfood	200.618	119.42	547.071	2566.62	0.0170654	-0.0128241	-0.75147	0.45237	0.874582	NS	NS	NS
S13_Escherichia coli, Bacteroides fragilis	Ready_meals	205	205	-0.0761095	0.668047	-0.000636216	0.0757549	0.993308	0.993308	Ready_meals	126	126	-0.0726462	0.963861	-0.0289749	0.0454189	0.524765	0.982067	Ready_meals	223	223	0.0593805	0.744316	-0.0196239	0.0289138	0.498076	0.993664	Ready_meals	871	871	0.0135936	0.640699	0.000708762	0.0185434	0.96952	0.96952	Ready_meals	174.252	484.76	1196.16	2908.17	0.0144892	-0.00746721	-0.515365	0.606298	0.879132	NS	NS	NS
S22_Mucin degraders	Ready_meals	205	205	-0.0761095	0.668047	0.00108413	0.045825	0.981149	0.993308	Ready_meals	126	126	-0.0726462	0.963861	-0.00416094	0.0478332	0.930827	0.982067	Ready_meals	223	223	0.0593805	0.744316	-0.0461971	0.0487937	0.344827	0.993664	Ready_meals	871	871	0.0135936	0.640699	-0.00497997	0.0273237	0.855423	0.96952	Ready_meals	476.207	437.061	420.023	1339.43	0.019343	-0.0102429	-0.529542	0.59643	0.879132	NS	NS	NS
S1_Acetate/butyrate producers	Porridge_ready_Fish_fried_Chocolatemilk	205	205	0.0773975	0.762121	0.01303	0.0485323	0.788607	0.892969	Porridge_ready_Fish_fried_Chocolatemilk	126	126	0.129518	0.829902	-0.0765295	0.0331274	0.0226324	0.640831	Porridge_ready_Fish_fried_Chocolatemilk	223	223	-0.0295003	0.594099	0.0396166	0.0294454	0.179898	0.786947	Porridge_ready_Fish_fried_Chocolatemilk	871	871	-0.0289628	0.569582	0.000451097	0.0138585	0.974041	0.994502	Porridge_ready_Fish_fried_Chocolatemilk	424.559	911.222	1153.36	5206.77	0.0113991	-0.00210011	-0.184235	0.853829	0.884323	NS	NS	NS
S3_Faecalibacterium_prausnitzii_Bifidobacterium_bifidum	Cheese_Butter	205	205	-0.0931494	0.425837	-0.0828069	0.118191	0.484365	0.931457	Cheese_Butter	126	126	-0.00880917	0.675371	-0.12036	0.13573	0.376995	0.958474	Cheese_Butter	223	223	-0.0538434	0.563146	-0.0902412	0.0785689	0.252013	0.836161	Cheese_Butter	871	871	0.0356952	0.679706	0.0483573	0.0342448	0.158279	0.838447	Cheese_Butter	71.586	54.281	161.994	852.73	0.0296098	0.0124112	0.419157	0.675101	0.889906	NS	NS	NS
28_Haemophilus, Veillonella	Meat_Potatoes_Gravy	205	205	0.0092388	0.66643	-0.0257101	0.0473465	0.587836	0.841698	Meat_Potatoes_Gravy	126	126	0.0317397	0.612627	0.0672679	0.04692	0.154609	0.448366	Meat_Potatoes_Gravy	223	223	-0.12186	0.546907	-0.0234118	0.0286277	0.414447	0.822655	Meat_Potatoes_Gravy	871	871	0.0247565	0.537179	0.00964358	0.0188318	0.608726	0.909477	Meat_Potatoes_Gravy	446.092	454.239	1220.19	2819.78	0.0142273	0.0035853	0.252001	0.80104	0.890432	NS	NS	NS
S10_Bacteroides eggerthii	Meat_Potatoes_Gravy	205	205	0.0092388	0.66643	0.10712	0.153126	0.485022	0.838075	Meat_Potatoes_Gravy	126	126	0.0317397	0.612627	-0.486223	0.254085	0.0580509	0.336695	Meat_Potatoes_Gravy	223	223	-0.12186	0.546907	0.0637641	0.112336	0.570881	0.822655	Meat_Potatoes_Gravy	871	871	0.0247565	0.537179	-0.0313594	0.0661662	0.635656	0.909477	Meat_Potatoes_Gravy	42.6485	15.4896	79.243	228.416	0.0522853	-0.0138684	-0.265245	0.790821	0.890432	NS	NS	NS
S29_Sutterella wadsworthensis	Meat_Potatoes_Gravy	205	205	0.0092388	0.66643	-0.0876455	0.111466	0.432677	0.838075	Meat_Potatoes_Gravy	126	126	0.0317397	0.612627	0.100084	0.108117	0.356664	0.515934	Meat_Potatoes_Gravy	223	223	-0.12186	0.546907	0.0388739	0.086718	0.654399	0.822655	Meat_Potatoes_Gravy	871	871	0.0247565	0.537179	-0.0101284	0.0251207	0.686915	0.909477	Meat_Potatoes_Gravy	80.4852	85.5487	132.979	1584.66	0.0230408	-0.00497577	-0.215955	0.829023	0.890432	NS	NS	NS
S17_Alistipes	Spreads_sweet	205	205	-0.0555374	0.536875	0.265106	0.212331	0.213298	0.618565	Spreads_sweet	126	126	0.0129582	0.465282	-0.132127	0.217369	0.544436	0.978735	Spreads_sweet	223	223	-0.0241369	0.470388	-0.118476	0.135012	0.381171	0.73693	Spreads_sweet	871	871	0.0180257	0.519839	-0.00555694	0.0576688	0.923257	0.956231	Spreads_sweet	22.1805	21.1644	54.8602	300.689	0.0500693	-0.0127522	-0.254691	0.798962	0.89115	NS	NS	NS
S15_Parabacteroides johnsonii	Cheese_Butter	205	205	-0.0931494	0.425837	-0.117791	0.248957	0.636633	0.931457	Cheese_Butter	126	126	-0.00880917	0.675371	0.203358	0.15387	0.188809	0.958474	Cheese_Butter	223	223	-0.0538434	0.563146	0.066601	0.0914108	0.467038	0.876842	Cheese_Butter	871	871	0.0356952	0.679706	-0.0495315	0.0451044	0.272443	0.838447	Cheese_Butter	16.1343	42.2369	119.676	491.544	0.0386452	-0.0144681	-0.374383	0.70812	0.892847	NS	NS	NS
S15_Parabacteroides johnsonii	Sweetened_tea_yoghurtdrink	205	205	0.111425	1.12755	-0.0168348	0.100167	0.866701	0.927838	Sweetened_tea_yoghurtdrink	126	126	0.0674218	0.540567	-0.0866641	0.197031	0.660837	0.814725	Sweetened_tea_yoghurtdrink	223	223	0.00250442	0.480442	-0.0326569	0.105322	0.756807	0.877896	Sweetened_tea_yoghurtdrink	871	871	-0.0373747	0.434722	0.0778469	0.0692091	0.260983	0.901398	Sweetened_tea_yoghurtdrink	99.6665	25.7591	90.1492	208.773	0.0485444	0.0221471	0.456223	0.64823	0.895174	NS	NS	NS
S6_Bifidobacterium_pseudocatenulatum	Dairy_Cereals	205	205	-0.161259	0.558239	0.217094	0.178631	0.225683	0.65448	Dairy_Cereals	126	126	-0.0521211	0.621192	0.0486385	0.18482	0.792874	0.958129	Dairy_Cereals	223	223	-0.0111794	0.671357	-0.177865	0.0982351	0.0715858	0.919942	Dairy_Cereals	871	871	0.0462207	0.622802	0.0535012	0.049064	0.275824	0.572654	Dairy_Cereals	31.3391	29.2753	103.625	415.408	0.0415354	0.0207384	0.499295	0.617571	0.895478	NS	NS	NS
S17_Alistipes	Fastfood	205	205	0.059247	0.613728	-0.224731	0.261598	0.391335	0.744536	Fastfood	126	126	0.0181697	0.719587	0.0876014	0.234196	0.709026	0.996213	Fastfood	223	223	-0.0641103	0.381483	0.222203	0.202638	0.274053	0.467502	Fastfood	871	871	8.79047e-06	0.532809	0.0401121	0.0803441	0.617727	0.942847	Fastfood	14.6127	18.2323	24.3532	154.915	0.068662	0.0468551	0.682401	0.494985	0.897161	NS	NS	NS
S2_Bifidobacterium animalis	Ready_meals	205	205	-0.0761095	0.668047	-0.029714	0.0573022	0.604651	0.826175	Ready_meals	126	126	-0.0726462	0.963861	0.0902408	0.121249	0.458172	0.982067	Ready_meals	223	223	0.0593805	0.744316	0.0717825	0.121163	0.554169	0.993664	Ready_meals	871	871	0.0135936	0.640699	0.0311855	0.0543566	0.566306	0.966051	Ready_meals	304.549	68.0216	68.1178	338.45	0.0358255	0.0160862	0.449014	0.653422	0.902344	NS	NS	NS
S10_Bacteroides eggerthii	Vegetables_Fruit_Tea	205	205	-0.11222	0.77642	0.141963	0.113074	0.210772	0.611239	Vegetables_Fruit_Tea	126	126	-0.000156026	0.675955	-0.446773	0.204279	0.0306763	0.33342	Vegetables_Fruit_Tea	223	223	0.0418139	0.681131	0.0843733	0.0775578	0.277856	0.813179	Vegetables_Fruit_Tea	871	871	0.0161285	0.690431	-0.0358472	0.0448895	0.424761	0.756174	Vegetables_Fruit_Tea	78.2124	23.9637	166.245	496.262	0.0361626	-0.00440181	-0.121723	0.903119	0.903119	NS	NS	NS
S13_Escherichia coli, Bacteroides fragilis	Vegetables_Fruit_Tea	205	205	-0.11222	0.77642	-0.0929569	0.0634716	0.144689	0.555356	Vegetables_Fruit_Tea	126	126	-0.000156026	0.675955	0.103877	0.0651032	0.113303	0.464575	Vegetables_Fruit_Tea	223	223	0.0418139	0.681131	-0.00976327	0.0314126	0.756257	0.958588	Vegetables_Fruit_Tea	871	871	0.0161285	0.690431	0.00522156	0.0163246	0.749154	0.804647	Vegetables_Fruit_Tea	248.222	235.937	1013.43	3752.43	0.0138013	0.0021207	0.15366	0.877878	0.903119	NS	NS	NS
S14_Odoribacter	Spreads_sweet	205	205	-0.0555374	0.536875	-0.0285281	0.0818168	0.727728	0.94012	Spreads_sweet	126	126	0.0129582	0.465282	0.14676	0.218529	0.503142	0.978735	Spreads_sweet	223	223	-0.0241369	0.470388	0.0058673	0.108905	0.957087	0.957087	Spreads_sweet	871	871	0.0180257	0.519839	0.0162451	0.0540991	0.764033	0.820628	Spreads_sweet	149.388	20.9402	84.3141	341.68	0.0409505	0.00814453	0.198887	0.842351	0.904747	NS	NS	NS
S25_Lachnospiraceae bacterium 3 1 57FAA	Pasta_Pizza	205	205	-0.126846	0.636288	-0.11571	0.128852	0.370268	0.596543	Pasta_Pizza	126	126	-0.0709619	0.607965	0.0742584	0.120992	0.540546	0.989316	Pasta_Pizza	223	223	0.00315542	0.506156	0.10513	0.105734	0.32119	0.550438	Pasta_Pizza	871	871	0.0399249	0.617093	-0.0687223	0.070005	0.326534	0.8602	Pasta_Pizza	60.2308	68.3101	89.4482	204.052	0.0486768	-0.0154391	-0.317175	0.751111	0.907592	NS	NS	NS
S26_Roseburia	Icecream_Beer_non-alcoholic	205	205	-0.119788	0.542039	0.0651626	0.12969	0.61592	0.862958	Icecream_Beer_non-alcoholic	126	126	-0.0410161	0.57799	0.0930424	0.124257	0.455488	0.877335	Icecream_Beer_non-alcoholic	223	223	-0.0245111	0.517043	-0.0896793	0.0541261	0.0991814	0.67146	Icecream_Beer_non-alcoholic	871	871	0.0407092	0.884625	-0.00863871	0.034018	0.7996	0.89721	Icecream_Beer_non-alcoholic	59.4544	64.7671	341.339	864.135	0.0274236	-0.0211896	-0.77268	0.439712	0.910831	NS	NS	NS
S17_Alistipes	Wine_Alcohol	205	205	-0.27214	0.559289	-0.056061	0.196355	0.775552	0.875346	Wine_Alcohol	126	126	-0.21131	0.583969	-0.0388463	0.16483	0.814087	0.892704	Wine_Alcohol	223	223	-0.0117566	0.664384	0.0837884	0.0881363	0.34283	0.880426	Wine_Alcohol	871	871	0.0981863	0.783786	0.00913	0.0369241	0.804762	0.891516	Wine_Alcohol	25.9367	36.8066	128.733	733.468	0.0328808	0.0157837	0.480029	0.631207	0.91525	NS	NS	NS
S26_Roseburia	Fruit_Juice_Milk	205	205	0.0499406	0.971662	-0.0742182	0.0735283	0.314042	0.677861	Fruit_Juice_Milk	126	126	0.0470696	0.883709	-0.10333	0.0971956	0.289919	0.986097	Fruit_Juice_Milk	223	223	-0.0460608	0.585582	-0.0482212	0.0502361	0.338317	0.958707	Fruit_Juice_Milk	871	871	-0.00752221	0.66348	0.0484587	0.0395374	0.220676	0.601738	Fruit_Juice_Milk	184.966	105.854	396.249	639.711	0.0274537	-0.00962762	-0.350686	0.725824	0.91799	NS	NS	NS
S8_Eggerthella lenta, Gordonibacter pamelaeae	Fruit_Juice_Milk	205	205	0.0499406	0.971662	-0.127298	0.063908	0.0477645	0.677861	Fruit_Juice_Milk	126	126	0.0470696	0.883709	0.146479	0.0865119	0.0931074	0.928685	Fruit_Juice_Milk	223	223	-0.0460608	0.585582	0.0334584	0.0680604	0.623507	0.958707	Fruit_Juice_Milk	871	871	-0.00752221	0.66348	-0.00916769	0.0305647	0.764294	0.968309	Fruit_Juice_Milk	244.844	133.613	215.879	1070.43	0.0245088	-0.00852187	-0.347706	0.728061	0.91799	NS	NS	NS
S13_Escherichia coli, Bacteroides fragilis	Fruit_Juice_Milk	205	205	0.0499406	0.971662	0.0386134	0.0506668	0.446937	0.762422	Fruit_Juice_Milk	126	126	0.0470696	0.883709	-0.027847	0.0565398	0.623282	0.986097	Fruit_Juice_Milk	223	223	-0.0460608	0.585582	0.00532574	0.0371446	0.886129	0.988375	Fruit_Juice_Milk	871	871	-0.00752221	0.66348	-0.00971276	0.0177566	0.584526	0.892171	Fruit_Juice_Milk	389.541	312.818	724.783	3171.6	0.0147462	-0.00448264	-0.303986	0.761138	0.919709	NS	NS	NS
28_Haemophilus, Veillonella	Dairy_lf	205	205	-0.0789894	0.503158	-0.109227	0.0512032	0.0343593	0.254416	Dairy_lf	126	126	-0.0346258	0.518191	-0.0333763	0.0472463	0.48147	0.734875	Dairy_lf	223	223	0.0070026	0.453292	-0.0207447	0.0289469	0.474434	0.774319	Dairy_lf	871	871	0.0221807	0.682257	0.00798784	0.0126463	0.527803	0.887984	Dairy_lf	381.423	447.985	1193.42	6252.74	0.0109926	-0.00379734	-0.345444	0.72976	0.920133	NS	NS	NS
S1_Acetate/butyrate producers	Dairy_lf	205	205	-0.0789894	0.503158	-0.0441243	0.0732224	0.547457	0.953416	Dairy_lf	126	126	-0.0346258	0.518191	-0.0259153	0.0527202	0.623949	0.780806	Dairy_lf	223	223	0.0070026	0.453292	0.0681629	0.0374415	0.0700638	0.774319	Dairy_lf	871	871	0.0221807	0.682257	-0.0124474	0.0113683	0.27386	0.887984	Dairy_lf	186.514	359.788	713.336	7737.59	0.0105426	-0.00725153	-0.687834	0.491557	0.920133	NS	NS	NS
S10_Bacteroides eggerthii	Dairy_lf	205	205	-0.0789894	0.503158	0.140544	0.173419	0.41866	0.867224	Dairy_lf	126	126	-0.0346258	0.518191	-0.439816	0.253093	0.0848176	0.538781	Dairy_lf	223	223	0.0070026	0.453292	0.0653165	0.112827	0.563253	0.774319	Dairy_lf	871	871	0.0221807	0.682257	-0.0293715	0.0450745	0.514818	0.887984	Dairy_lf	33.2512	15.6113	78.5546	492.197	0.0401735	-0.0185898	-0.462739	0.643552	0.920133	NS	NS	NS
S11_Bacteroides faecis	Dairy_lf	205	205	-0.0789894	0.503158	0.00859608	0.146964	0.953416	0.953416	Dairy_lf	126	126	-0.0346258	0.518191	-0.00822729	0.230882	0.971633	0.971633	Dairy_lf	223	223	0.0070026	0.453292	0.149424	0.152503	0.328271	0.774319	Dairy_lf	871	871	0.0221807	0.682257	-0.0459568	0.0467038	0.325388	0.887984	Dairy_lf	46.2997	18.7595	42.9977	458.453	0.0420142	-0.0254197	-0.605026	0.545162	0.920133	NS	NS	NS
S12_Bacteroides finegoldii	Dairy_lf	205	205	-0.0789894	0.503158	0.034921	0.194161	0.857449	0.953416	Dairy_lf	126	126	-0.0346258	0.518191	0.275887	0.212462	0.196597	0.57013	Dairy_lf	223	223	0.0070026	0.453292	-0.103599	0.139649	0.458976	0.774319	Dairy_lf	871	871	0.0221807	0.682257	-0.0237216	0.0436607	0.587052	0.887984	Dairy_lf	26.5262	22.1533	51.2775	524.587	0.0400146	-0.0171617	-0.428886	0.668006	0.920133	NS	NS	NS
S13_Escherichia coli, Bacteroides fragilis	Dairy_lf	205	205	-0.0789894	0.503158	-0.0322185	0.0963642	0.738489	0.953416	Dairy_lf	126	126	-0.0346258	0.518191	-0.0530895	0.0831449	0.524395	0.760373	Dairy_lf	223	223	0.0070026	0.453292	-0.0427396	0.0462354	0.356349	0.774319	Dairy_lf	871	871	0.0221807	0.682257	-0.00564193	0.016351	0.730141	0.887984	Dairy_lf	107.688	144.654	467.789	3740.34	0.014973	-0.0117129	-0.782266	0.434058	0.920133	NS	NS	NS
S15_Parabacteroides johnsonii	Dairy_lf	205	205	-0.0789894	0.503158	0.111244	0.21242	0.60107	0.953416	Dairy_lf	126	126	-0.0346258	0.518191	0.0766071	0.200634	0.703266	0.815789	Dairy_lf	223	223	0.0070026	0.453292	-0.0905766	0.109625	0.409576	0.774319	Dairy_lf	871	871	0.0221807	0.682257	-0.0556922	0.0437372	0.203241	0.853164	Dairy_lf	22.162	24.8422	83.2107	522.754	0.0391339	-0.0494384	-1.26331	0.206477	0.920133	NS	NS	NS
S16_Propionate/succinate producers	Dairy_lf	205	205	-0.0789894	0.503158	0.0899263	0.0523897	0.0877194	0.459491	Dairy_lf	126	126	-0.0346258	0.518191	-0.0893541	0.108574	0.412153	0.734875	Dairy_lf	223	223	0.0070026	0.453292	0.027041	0.0839265	0.747618	0.774319	Dairy_lf	871	871	0.0221807	0.682257	0.0101567	0.0344171	0.767984	0.890861	Dairy_lf	364.342	84.8298	141.972	844.214	0.0263949	0.0261938	0.992383	0.321011	0.920133	NS	NS	NS
S18_Lactobacillus delbrueckii	Dairy_lf	205	205	-0.0789894	0.503158	0.113995	0.233301	0.625649	0.953416	Dairy_lf	126	126	-0.0346258	0.518191	-0.0909712	0.197665	0.646184	0.780806	Dairy_lf	223	223	0.0070026	0.453292	-0.137522	0.12138	0.258472	0.774319	Dairy_lf	871	871	0.0221807	0.682257	-0.0263321	0.0402489	0.513137	0.887984	Dairy_lf	18.3725	25.5942	67.8742	617.294	0.0370336	-0.0354156	-0.95631	0.338916	0.920133	NS	NS	NS
S19_Streptococci, L. sakei	Dairy_lf	205	205	-0.0789894	0.503158	-0.0323655	0.0484563	0.505004	0.953416	Dairy_lf	126	126	-0.0346258	0.518191	0.0241549	0.0925971	0.794675	0.85354	Dairy_lf	223	223	0.0070026	0.453292	-0.0255347	0.0735787	0.728909	0.774319	Dairy_lf	871	871	0.0221807	0.682257	-0.00912414	0.0212867	0.668303	0.887984	Dairy_lf	425.893	116.629	184.712	2206.9	0.0184612	-0.0122079	-0.661275	0.508436	0.920133	NS	NS	NS
S2_Bifidobacterium animalis	Dairy_lf	205	205	-0.0789894	0.503158	-0.0182841	0.0734513	0.803673	0.953416	Dairy_lf	126	126	-0.0346258	0.518191	-0.0639322	0.214577	0.76626	0.85354	Dairy_lf	223	223	0.0070026	0.453292	0.282176	0.193868	0.146975	0.774319	Dairy_lf	871	871	0.0221807	0.682257	0.0181078	0.0479539	0.705814	0.887984	Dairy_lf	185.354	21.7187	26.6064	434.862	0.0386755	0.0158622	0.410136	0.681706	0.920133	NS	NS	NS
S20_Lactococcus lactis	Dairy_lf	205	205	-0.0789894	0.503158	-0.0809344	0.0932972	0.386718	0.86268	Dairy_lf	126	126	-0.0346258	0.518191	0.0168576	0.168414	0.920435	0.953308	Dairy_lf	223	223	0.0070026	0.453292	0.117841	0.0724794	0.105525	0.774319	Dairy_lf	871	871	0.0221807	0.682257	0.0098894	0.0226668	0.66274	0.887984	Dairy_lf	114.885	35.2568	190.358	1946.34	0.0209113	0.01442	0.689578	0.490459	0.920133	NS	NS	NS
S22_Mucin degraders	Dairy_lf	205	205	-0.0789894	0.503158	0.0761695	0.0577131	0.188435	0.683077	Dairy_lf	126	126	-0.0346258	0.518191	0.118994	0.0856244	0.167208	0.538781	Dairy_lf	223	223	0.0070026	0.453292	-0.0953389	0.0799876	0.234625	0.774319	Dairy_lf	871	871	0.0221807	0.682257	-0.0416244	0.0240065	0.0832979	0.853164	Dairy_lf	300.228	136.397	156.298	1735.17	0.0207252	-0.0206298	-0.995396	0.319544	0.920133	NS	NS	NS
S23_B. hydrogenotrophica	Dairy_lf	205	205	-0.0789894	0.503158	0.0152243	0.189646	0.936097	0.953416	Dairy_lf	126	126	-0.0346258	0.518191	-0.232253	0.270912	0.392988	0.734875	Dairy_lf	223	223	0.0070026	0.453292	-0.0922421	0.144768	0.524686	0.774319	Dairy_lf	871	871	0.0221807	0.682257	-0.0489792	0.0377332	0.19462	0.853164	Dairy_lf	27.8044	13.6252	47.7147	702.348	0.0355449	-0.0524869	-1.47664	0.139773	0.920133	NS	NS	NS
S25_Lachnospiraceae bacterium 3 1 57FAA	Dairy_lf	205	205	-0.0789894	0.503158	0.37357	0.150259	0.013736	0.199172	Dairy_lf	126	126	-0.0346258	0.518191	0.0974896	0.124254	0.434234	0.734875	Dairy_lf	223	223	0.0070026	0.453292	0.0682281	0.09801	0.48709	0.774319	Dairy_lf	871	871	0.0221807	0.682257	0.012533	0.0539137	0.816232	0.891423	Dairy_lf	44.2914	64.7709	104.102	344.034	0.0423638	0.0615129	1.45201	0.146498	0.920133	NS	NS	NS
S26_Roseburia	Dairy_lf	205	205	-0.0789894	0.503158	0.125258	0.139716	0.371079	0.86268	Dairy_lf	126	126	-0.0346258	0.518191	0.219465	0.138717	0.116324	0.538781	Dairy_lf	223	223	0.0070026	0.453292	-0.034911	0.0638386	0.585107	0.774319	Dairy_lf	871	871	0.0221807	0.682257	-0.028723	0.035992	0.425073	0.887984	Dairy_lf	51.2282	51.9688	245.377	771.947	0.0298738	-0.0115276	-0.385876	0.699589	0.920133	NS	NS	NS
S27_Turicibacter_sanguinis	Dairy_lf	205	205	-0.0789894	0.503158	0.0148954	0.0581695	0.798162	0.953416	Dairy_lf	126	126	-0.0346258	0.518191	-0.0968748	0.168333	0.566034	0.769127	Dairy_lf	223	223	0.0070026	0.453292	0.0133183	0.026658	0.617959	0.774319	Dairy_lf	871	871	0.0221807	0.682257	0.00541503	0.0308447	0.860685	0.891423	Dairy_lf	295.535	35.2909	1407.16	1051.09	0.0189352	0.00911267	0.481255	0.630335	0.920133	NS	NS	NS
S4_Bifidobacterium_catenulatum	Dairy_lf	205	205	-0.0789894	0.503158	-0.0432539	0.159444	0.786457	0.953416	Dairy_lf	126	126	-0.0346258	0.518191	0.21923	0.112902	0.0545076	0.538781	Dairy_lf	223	223	0.0070026	0.453292	0.117633	0.140011	0.401737	0.774319	Dairy_lf	871	871	0.0221807	0.682257	0.00934715	0.0275928	0.734883	0.887984	Dairy_lf	39.3356	78.4512	51.0127	1313.43	0.0259742	0.0227866	0.87728	0.380335	0.920133	NS	NS	NS
S6_Bifidobacterium_pseudocatenulatum	Dairy_lf	205	205	-0.0789894	0.503158	-0.164582	0.188223	0.382957	0.86268	Dairy_lf	126	126	-0.0346258	0.518191	-0.178696	0.221867	0.42217	0.734875	Dairy_lf	223	223	0.0070026	0.453292	-0.0596742	0.136519	0.662465	0.774319	Dairy_lf	871	871	0.0221807	0.682257	0.0608184	0.043141	0.158971	0.853164	Dairy_lf	28.2262	20.3149	53.6551	537.303	0.039544	0.0331515	0.838345	0.401837	0.920133	NS	NS	NS
S8_Eggerthella lenta, Gordonibacter pamelaeae	Dairy_lf	205	205	-0.0789894	0.503158	0.44151	0.129536	0.000792328	0.0229775	Dairy_lf	126	126	-0.0346258	0.518191	-0.11162	0.136636	0.415653	0.734875	Dairy_lf	223	223	0.0070026	0.453292	-0.0407811	0.0834145	0.625415	0.774319	Dairy_lf	871	871	0.0221807	0.682257	0.0260934	0.0277276	0.346942	0.887984	Dairy_lf	59.5966	53.5635	143.72	1300.69	0.0253382	0.0310818	1.22668	0.219944	0.920133	NS	NS	NS
S9_Bacteroides, Roseburia	Dairy_lf	205	205	-0.0789894	0.503158	0.0731775	0.0519251	0.160318	0.664176	Dairy_lf	126	126	-0.0346258	0.518191	-0.0458652	0.0645429	0.478702	0.734875	Dairy_lf	223	223	0.0070026	0.453292	-0.060083	0.0525755	0.254384	0.774319	Dairy_lf	871	871	0.0221807	0.682257	-0.00898344	0.0153093	0.557493	0.887984	Dairy_lf	370.89	240.05	361.77	4266.7	0.0138153	-0.00838548	-0.606973	0.543869	0.920133	NS	NS	NS
S1_Acetate/butyrate producers	Coffee_milk_Soup	205	205	-0.0190486	0.599621	0.0317341	0.0660603	0.631484	0.895957	Coffee_milk_Soup	126	126	0.00261508	0.755444	0.0342471	0.0365714	0.350974	0.953261	Coffee_milk_Soup	223	223	-0.00397076	0.684592	-0.00696084	0.0254311	0.784566	0.910097	Coffee_milk_Soup	871	871	0.00528062	0.524601	0.000702568	0.0150208	0.962705	0.965634	Coffee_milk_Soup	229.149	747.68	1546.21	4432.12	0.0119907	0.00362733	0.302511	0.762263	0.921068	NS	NS	NS
S10_Bacteroides eggerthii	Coffee_milk_Soup	205	205	-0.0190486	0.599621	0.39923	0.154085	0.0102791	0.197676	Coffee_milk_Soup	126	126	0.00261508	0.755444	0.0466745	0.178214	0.793846	0.953261	Coffee_milk_Soup	223	223	-0.00397076	0.684592	-0.0600721	0.0760037	0.430167	0.806798	Coffee_milk_Soup	871	871	0.00528062	0.524601	0.0100224	0.0595161	0.86631	0.965634	Coffee_milk_Soup	42.1193	31.4859	173.113	282.313	0.043477	0.0202541	0.465857	0.641318	0.921068	NS	NS	NS
S12_Bacteroides finegoldii	Coffee_milk_Soup	205	205	-0.0190486	0.599621	0.159174	0.174762	0.363499	0.765539	Coffee_milk_Soup	126	126	0.00261508	0.755444	-0.165327	0.148066	0.266408	0.953261	Coffee_milk_Soup	223	223	-0.00397076	0.684592	0.116927	0.0939184	0.214479	0.735351	Coffee_milk_Soup	871	871	0.00528062	0.524601	0.0121602	0.0576446	0.832976	0.965634	Coffee_milk_Soup	32.7421	45.6131	113.37	300.942	0.045053	0.0296066	0.657152	0.511083	0.921068	NS	NS	NS
S14_Odoribacter	Coffee_milk_Soup	205	205	-0.0190486	0.599621	-0.0483563	0.0787791	0.540096	0.864893	Coffee_milk_Soup	126	126	0.00261508	0.755444	-0.0258017	0.131361	0.844615	0.953261	Coffee_milk_Soup	223	223	-0.00397076	0.684592	-0.0477788	0.0693573	0.491675	0.806798	Coffee_milk_Soup	871	871	0.00528062	0.524601	0.0123111	0.0524826	0.814595	0.965634	Coffee_milk_Soup	161.131	57.9519	207.881	363.052	0.0355781	-0.0186701	-0.524765	0.599746	0.921068	NS	NS	NS
S2_Bifidobacterium animalis	Coffee_milk_Soup	205	205	-0.0190486	0.599621	-0.0133369	0.0662483	0.840657	0.895957	Coffee_milk_Soup	126	126	0.00261508	0.755444	-0.0274102	0.149304	0.854648	0.953261	Coffee_milk_Soup	223	223	-0.00397076	0.684592	0.220804	0.13046	0.0919868	0.666904	Coffee_milk_Soup	871	871	0.00528062	0.524601	0.00684995	0.0633085	0.913862	0.965634	Coffee_milk_Soup	227.851	44.8598	58.7547	249.503	0.0414881	0.0179251	0.432053	0.665703	0.921068	NS	NS	NS
S21_Clostridium bolteae, Coprobacillus	Coffee_milk_Soup	205	205	-0.0190486	0.599621	-0.139207	0.113416	0.221141	0.712566	Coffee_milk_Soup	126	126	0.00261508	0.755444	0.0132554	0.0418526	0.752071	0.953261	Coffee_milk_Soup	223	223	-0.00397076	0.684592	-0.0125677	0.0255849	0.623815	0.856802	Coffee_milk_Soup	871	871	0.00528062	0.524601	-0.00812397	0.0147834	0.582787	0.889517	Coffee_milk_Soup	77.7416	570.894	1527.67	4575.66	0.0121698	-0.00883101	-0.725647	0.468055	0.921068	NS	NS	NS
S22_Mucin degraders	Coffee_milk_Soup	205	205	-0.0190486	0.599621	-0.0128028	0.052148	0.806318	0.895957	Coffee_milk_Soup	126	126	0.00261508	0.755444	-0.0486885	0.0586247	0.407913	0.953261	Coffee_milk_Soup	223	223	-0.00397076	0.684592	0.00441596	0.052977	0.933647	0.933647	Coffee_milk_Soup	871	871	0.00528062	0.524601	-0.00687868	0.0319486	0.829581	0.965634	Coffee_milk_Soup	367.727	290.964	356.307	979.705	0.0223904	-0.012052	-0.538268	0.590392	0.921068	NS	NS	NS
S23_B. hydrogenotrophica	Coffee_milk_Soup	205	205	-0.0190486	0.599621	0.0610101	0.170987	0.721612	0.895957	Coffee_milk_Soup	126	126	0.00261508	0.755444	-0.268399	0.187441	0.154769	0.953261	Coffee_milk_Soup	223	223	-0.00397076	0.684592	0.117636	0.0973494	0.228212	0.735351	Coffee_milk_Soup	871	871	0.00528062	0.524601	0.00214884	0.0498598	0.965634	0.965634	Coffee_milk_Soup	34.2036	28.4623	105.52	402.252	0.0418693	0.0135419	0.323432	0.746368	0.921068	NS	NS	NS
S24_Ruminococcus S24_Ruminococcus gnavus, Lachnospiraceae bacterium 1 1 57FAA, Lachnospiraceae bacterium	Coffee_milk_Soup	205	205	-0.0190486	0.599621	-0.188207	0.148803	0.207435	0.712566	Coffee_milk_Soup	126	126	0.00261508	0.755444	-0.047118	0.0779203	0.546562	0.953261	Coffee_milk_Soup	223	223	-0.00397076	0.684592	0.028531	0.0286984	0.321307	0.806798	Coffee_milk_Soup	871	871	0.00528062	0.524601	-0.0146872	0.0191247	0.442721	0.855928	Coffee_milk_Soup	45.1622	164.702	1214.19	2734.08	0.0155078	-0.00523655	-0.337671	0.735611	0.921068	NS	NS	NS
S29_Sutterella wadsworthensis	Coffee_milk_Soup	205	205	-0.0190486	0.599621	-0.122952	0.112857	0.277341	0.765539	Coffee_milk_Soup	126	126	0.00261508	0.755444	-0.0212123	0.0731457	0.772372	0.953261	Coffee_milk_Soup	223	223	-0.00397076	0.684592	0.0112168	0.0587342	0.848723	0.911591	Coffee_milk_Soup	871	871	0.00528062	0.524601	0.0143231	0.0224445	0.523551	0.871681	Coffee_milk_Soup	78.5136	186.906	289.88	1985.09	0.0198404	0.00711154	0.358438	0.720016	0.921068	NS	NS	NS
S3_Faecalibacterium_prausnitzii_Bifidobacterium_bifidum	Coffee_milk_Soup	205	205	-0.0190486	0.599621	0.011931	0.0911193	0.895957	0.895957	Coffee_milk_Soup	126	126	0.00261508	0.755444	-0.0307023	0.122895	0.803153	0.953261	Coffee_milk_Soup	223	223	-0.00397076	0.684592	0.0429552	0.0636925	0.500771	0.806798	Coffee_milk_Soup	871	871	0.00528062	0.524601	-0.0489526	0.0438984	0.265104	0.717878	Coffee_milk_Soup	120.442	66.2111	246.504	518.922	0.0324088	-0.0161854	-0.499412	0.617489	0.921068	NS	NS	NS
S12_Bacteroides finegoldii	Icecream_Beer_non-alcoholic	205	205	-0.119788	0.542039	-0.122831	0.177697	0.490221	0.789801	Icecream_Beer_non-alcoholic	126	126	-0.0410161	0.57799	-0.0549507	0.190463	0.773454	0.887199	Icecream_Beer_non-alcoholic	223	223	-0.0245111	0.517043	0.00583456	0.124521	0.962671	0.995352	Icecream_Beer_non-alcoholic	871	871	0.0407092	0.884625	-0.0200406	0.033944	0.555075	0.883459	Icecream_Beer_non-alcoholic	31.6693	27.5662	64.4929	867.908	0.0317559	-0.022611	-0.712027	0.476448	0.921133	NS	NS	NS
S11_Bacteroides faecis	Sweetened_tea_yoghurtdrink	205	205	0.111425	1.12755	0.0112084	0.0692545	0.871593	0.927838	Sweetened_tea_yoghurtdrink	126	126	0.0674218	0.540567	-0.146902	0.226385	0.51764	0.768655	Sweetened_tea_yoghurtdrink	223	223	0.00250442	0.480442	-0.0540855	0.146596	0.712531	0.877896	Sweetened_tea_yoghurtdrink	871	871	-0.0373747	0.434722	0.0468613	0.0739123	0.526241	0.901398	Sweetened_tea_yoghurtdrink	208.499	19.5121	46.5323	183.048	0.0467478	0.0120888	0.258596	0.795947	0.923299	NS	NS	NS
S26_Roseburia	Sweetened_tea_yoghurtdrink	205	205	0.111425	1.12755	-0.0120953	0.0657478	0.854231	0.927838	Sweetened_tea_yoghurtdrink	126	126	0.0674218	0.540567	-0.0292711	0.138469	0.832949	0.894649	Sweetened_tea_yoghurtdrink	223	223	0.00250442	0.480442	-0.0223613	0.0613893	0.716069	0.877896	Sweetened_tea_yoghurtdrink	871	871	-0.0373747	0.434722	0.00219136	0.0575097	0.969614	0.981424	Sweetened_tea_yoghurtdrink	231.333	52.155	265.347	302.356	0.0342757	-0.0112732	-0.328897	0.742233	0.923299	NS	NS	NS
S3_Faecalibacterium_prausnitzii_Bifidobacterium_bifidum	Sweetened_tea_yoghurtdrink	205	205	0.111425	1.12755	-0.0308946	0.0475388	0.516521	0.927838	Sweetened_tea_yoghurtdrink	126	126	0.0674218	0.540567	0.137513	0.175962	0.436067	0.768655	Sweetened_tea_yoghurtdrink	223	223	0.00250442	0.480442	0.098435	0.0905146	0.278032	0.734174	Sweetened_tea_yoghurtdrink	871	871	-0.0373747	0.434722	0.0156129	0.0526035	0.766687	0.901398	Sweetened_tea_yoghurtdrink	442.491	32.2969	122.057	361.386	0.0323046	0.00879498	0.272251	0.785429	0.923299	NS	NS	NS
S6_Bifidobacterium_pseudocatenulatum	Sweetened_tea_yoghurtdrink	205	205	0.111425	1.12755	-0.108644	0.0885383	0.22124	0.712885	Sweetened_tea_yoghurtdrink	126	126	0.0674218	0.540567	0.163421	0.218004	0.454948	0.768655	Sweetened_tea_yoghurtdrink	223	223	0.00250442	0.480442	0.0986217	0.13087	0.451916	0.806662	Sweetened_tea_yoghurtdrink	871	871	-0.0373747	0.434722	0.0499213	0.0683089	0.465089	0.901398	Sweetened_tea_yoghurtdrink	127.567	21.0412	58.3872	214.311	0.0487193	0.0143272	0.294077	0.768699	0.923299	NS	NS	NS
S14_Odoribacter	Dairy_Cereals	205	205	-0.161259	0.558239	-0.0689978	0.0776441	0.375362	0.659005	Dairy_Cereals	126	126	-0.0521211	0.621192	-0.20659	0.155812	0.187392	0.816001	Dairy_Cereals	223	223	-0.0111794	0.671357	0.0476113	0.0751639	0.527153	0.919942	Dairy_Cereals	871	871	0.0462207	0.622802	0.0472874	0.0455023	0.298991	0.572654	Dairy_Cereals	165.876	41.1907	177.003	482.984	0.0339607	0.0130462	0.384155	0.700863	0.923865	NS	NS	NS
S4_Bifidobacterium_catenulatum	Dairy_Cereals	205	205	-0.161259	0.558239	-0.230453	0.150733	0.12788	0.65448	Dairy_Cereals	126	126	-0.0521211	0.621192	0.0671454	0.0950888	0.481474	0.958129	Dairy_Cereals	223	223	-0.0111794	0.671357	0.126002	0.101265	0.21474	0.919942	Dairy_Cereals	871	871	0.0462207	0.622802	0.00550944	0.0314871	0.861143	0.861143	Dairy_Cereals	44.0134	110.597	97.5172	1008.64	0.0281633	0.0119986	0.426036	0.670081	0.923865	NS	NS	NS
S15_Parabacteroides johnsonii	Rolls_Spreads	205	205	0.00970005	1.07387	-0.0559787	0.196842	0.776412	0.900638	Rolls_Spreads	126	126	0.0143831	0.689611	-0.213805	0.409727	0.602755	0.979653	Rolls_Spreads	223	223	-0.16152	0.433979	0.475744	0.252712	0.0610987	0.409099	Rolls_Spreads	871	871	0.0374261	0.602796	-0.106512	0.120092	0.375371	0.777554	Rolls_Spreads	25.8085	5.95678	15.6584	69.3378	0.0925444	-0.0227317	-0.24563	0.805969	0.924282	NS	NS	NS
S26_Roseburia	Rolls_Spreads	205	205	0.00970005	1.07387	0.00685279	0.130358	0.958129	0.958129	Rolls_Spreads	126	126	0.0143831	0.689611	0.0371969	0.285582	0.896593	0.979653	Rolls_Spreads	223	223	-0.16152	0.433979	-0.0288323	0.147925	0.845668	0.933598	Rolls_Spreads	871	871	0.0374261	0.602796	-0.0269976	0.099283	0.785746	0.957041	Rolls_Spreads	58.8468	12.2614	45.7001	101.45	0.0676885	-0.0146487	-0.216413	0.828666	0.924282	NS	NS	NS
S22_Mucin degraders	Dairy_Cereals	205	205	-0.161259	0.558239	0.0395058	0.0553858	0.476514	0.72731	Dairy_Cereals	126	126	-0.0521211	0.621192	-0.0249569	0.070654	0.724543	0.958129	Dairy_Cereals	223	223	-0.0111794	0.671357	-0.0123821	0.0569279	0.828025	0.919942	Dairy_Cereals	871	871	0.0462207	0.622802	-0.0136521	0.027374	0.618099	0.74687	Dairy_Cereals	325.989	200.321	308.567	1334.52	0.0214699	-0.00652746	-0.304028	0.761107	0.929867	NS	NS	NS
S5_Streptococcus, Bifidobacterium dentium	Dairy_Cereals	205	205	-0.161259	0.558239	0.052581	0.0547101	0.337758	0.659005	Dairy_Cereals	126	126	-0.0521211	0.621192	0.044695	0.0612316	0.466996	0.958129	Dairy_Cereals	223	223	-0.0111794	0.671357	0.0102482	0.0203318	0.614813	0.919942	Dairy_Cereals	871	871	0.0462207	0.622802	-0.011851	0.0118994	0.31958	0.572654	Dairy_Cereals	334.091	266.716	2419.06	7062.35	0.00995914	-0.00291773	-0.29297	0.769545	0.929867	NS	NS	NS
S18_Lactobacillus delbrueckii	Eggs_Alcoholic_drinks	205	205	-0.104303	0.43925	-0.175531	0.275799	0.525216	0.706598	Eggs_Alcoholic_drinks	126	126	-0.134042	0.302491	-0.396173	0.360476	0.273957	0.794475	Eggs_Alcoholic_drinks	223	223	-0.0546888	0.448173	-0.102293	0.124817	0.413374	0.756933	Eggs_Alcoholic_drinks	871	871	0.0583724	0.606478	0.0109963	0.0494398	0.824042	0.949578	Eggs_Alcoholic_drinks	13.1467	7.69568	64.188	409.117	0.0449854	-0.0150233	-0.333959	0.738411	0.93104	NS	NS	NS
S11_Bacteroides faecis	Pastry_Cream	205	205	-0.0651555	0.556024	0.131216	0.135239	0.333097	0.910744	Pastry_Cream	126	126	0.0592037	0.832987	0.000681565	0.171885	0.996843	0.996843	Pastry_Cream	223	223	-0.0509842	0.476141	0.13174	0.152552	0.388775	0.802771	Pastry_Cream	871	871	0.0200538	0.596495	-0.0647426	0.0570248	0.256546	0.837149	Pastry_Cream	54.6759	33.8473	42.9699	307.52	0.0477267	-0.0160618	-0.336537	0.736466	0.932584	NS	NS	NS
S14_Odoribacter	Pastry_Cream	205	205	-0.0651555	0.556024	-0.0823021	0.0759569	0.279996	0.910744	Pastry_Cream	126	126	0.0592037	0.832987	0.0408998	0.140553	0.77156	0.932301	Pastry_Cream	223	223	-0.0509842	0.476141	-0.0259055	0.109267	0.812827	0.901239	Pastry_Cream	871	871	0.0200538	0.596495	0.0551998	0.0486233	0.256587	0.837149	Pastry_Cream	173.327	50.6198	83.7565	422.971	0.0369946	0.0122946	0.332335	0.739636	0.932584	NS	NS	NS
S15_Parabacteroides johnsonii	Pastry_Cream	205	205	-0.0651555	0.556024	-0.162203	0.195731	0.408264	0.910744	Pastry_Cream	126	126	0.0592037	0.832987	0.0170683	0.149448	0.909263	0.976616	Pastry_Cream	223	223	-0.0509842	0.476141	0.00714077	0.109778	0.948196	0.964896	Pastry_Cream	871	871	0.0200538	0.596495	-0.016476	0.0534596	0.758008	0.884679	Pastry_Cream	26.1025	44.7732	82.9794	349.904	0.0445542	-0.0171554	-0.385045	0.700204	0.932584	NS	NS	NS
S16_Propionate/succinate producers	Pastry_Cream	205	205	-0.0651555	0.556024	0.0192542	0.0491309	0.695579	0.916899	Pastry_Cream	126	126	0.0592037	0.832987	-0.0793777	0.0807331	0.327481	0.730535	Pastry_Cream	223	223	-0.0509842	0.476141	0.0748662	0.084486	0.376543	0.802771	Pastry_Cream	871	871	0.0200538	0.596495	-0.035254	0.0420522	0.402074	0.837149	Pastry_Cream	414.277	153.425	140.098	565.486	0.0280245	-0.0107195	-0.382506	0.702086	0.932584	NS	NS	NS
S18_Lactobacillus delbrueckii	Pastry_Cream	205	205	-0.0651555	0.556024	-0.0457465	0.215298	0.83195	0.927944	Pastry_Cream	126	126	0.0592037	0.832987	-0.186272	0.1463	0.205402	0.578077	Pastry_Cream	223	223	-0.0509842	0.476141	-0.115594	0.121465	0.342325	0.802771	Pastry_Cream	871	871	0.0200538	0.596495	0.0185401	0.0491606	0.706166	0.884679	Pastry_Cream	21.5735	46.7209	67.7795	413.776	0.042646	-0.0179197	-0.420197	0.674342	0.932584	NS	NS	NS
S24_Ruminococcus S24_Ruminococcus gnavus, Lachnospiraceae bacterium 1 1 57FAA, Lachnospiraceae bacterium	Pastry_Cream	205	205	-0.0651555	0.556024	0.0940026	0.152247	0.537661	0.916899	Pastry_Cream	126	126	0.0592037	0.832987	-0.0392114	0.0840048	0.641536	0.885931	Pastry_Cream	223	223	-0.0509842	0.476141	-0.0675195	0.0434298	0.121557	0.77297	Pastry_Cream	871	871	0.0200538	0.596495	0.0211486	0.0176943	0.23234	0.837149	Pastry_Cream	43.1422	141.707	530.181	3193.99	0.0159943	0.00773842	0.483822	0.628512	0.932584	NS	NS	NS
S29_Sutterella wadsworthensis	Pastry_Cream	205	205	-0.0651555	0.556024	0.00661126	0.128224	0.958934	0.985105	Pastry_Cream	126	126	0.0592037	0.832987	-0.0655035	0.0784185	0.405389	0.839734	Pastry_Cream	223	223	-0.0509842	0.476141	0.261407	0.085299	0.00245596	0.0712228	Pastry_Cream	871	871	0.0200538	0.596495	-0.0208756	0.0219798	0.342515	0.837149	Pastry_Cream	60.8218	162.616	137.44	2069.92	0.0202827	-0.00721277	-0.355612	0.722131	0.932584	NS	NS	NS
S3_Faecalibacterium_prausnitzii_Bifidobacterium_bifidum	Pastry_Cream	205	205	-0.0651555	0.556024	0.0200293	0.0931639	0.829997	0.927944	Pastry_Cream	126	126	0.0592037	0.832987	-0.253095	0.129185	0.0524313	0.372001	Pastry_Cream	223	223	-0.0509842	0.476141	-0.0706402	0.0944049	0.455116	0.802771	Pastry_Cream	871	871	0.0200538	0.596495	0.0108189	0.0406186	0.790031	0.884679	Pastry_Cream	115.214	59.9209	112.205	606.108	0.0334553	-0.0159235	-0.475962	0.634101	0.932584	NS	NS	NS
S7_Alistipes, Bacteroides	Pastry_Cream	205	205	-0.0651555	0.556024	-0.0710978	0.061379	0.248113	0.910744	Pastry_Cream	126	126	0.0592037	0.832987	0.152388	0.0495567	0.00260672	0.0251983	Pastry_Cream	223	223	-0.0509842	0.476141	0.0130115	0.0562211	0.817196	0.901239	Pastry_Cream	871	871	0.0200538	0.596495	-0.00605041	0.0230677	0.793161	0.884679	Pastry_Cream	265.437	407.189	316.374	1879.28	0.0186719	0.0125249	0.670786	0.502357	0.932584	NS	NS	NS
S18_Lactobacillus delbrueckii	Sweetened_tea_yoghurtdrink	205	205	0.111425	1.12755	0.0240325	0.109998	0.827278	0.927838	Sweetened_tea_yoghurtdrink	126	126	0.0674218	0.540567	-0.106808	0.19408	0.583117	0.768655	Sweetened_tea_yoghurtdrink	223	223	0.00250442	0.480442	0.0723711	0.116699	0.535808	0.853973	Sweetened_tea_yoghurtdrink	871	871	-0.0373747	0.434722	-0.0318242	0.0636827	0.617392	0.901398	Sweetened_tea_yoghurtdrink	82.6472	26.5484	73.4287	246.58	0.048269	-0.00788071	-0.163267	0.870309	0.934776	NS	NS	NS
S7_Alistipes, Bacteroides	Sweetened_tea_yoghurtdrink	205	205	0.111425	1.12755	0.00189533	0.0314648	0.952028	0.952028	Sweetened_tea_yoghurtdrink	126	126	0.0674218	0.540567	-0.139369	0.066709	0.0388024	0.37509	Sweetened_tea_yoghurtdrink	223	223	0.00250442	0.480442	-0.0901914	0.0536087	0.0939291	0.501058	Sweetened_tea_yoghurtdrink	871	871	-0.0373747	0.434722	0.0448144	0.0298461	0.133587	0.801801	Sweetened_tea_yoghurtdrink	1010.07	224.715	347.96	1122.6	0.019226	-0.0038731	-0.201451	0.840346	0.934776	NS	NS	NS
S1_Acetate/butyrate producers	Pastry_Cream	205	205	-0.0651555	0.556024	-0.0273515	0.0675731	0.686082	0.916899	Pastry_Cream	126	126	0.0592037	0.832987	0.0725047	0.0387955	0.064138	0.372001	Pastry_Cream	223	223	-0.0509842	0.476141	-0.0669918	0.0374476	0.0750242	0.725234	Pastry_Cream	871	871	0.0200538	0.596495	0.00447671	0.0138896	0.747299	0.884679	Pastry_Cream	219.004	664.413	713.103	5183.47	0.0121447	0.0025982	0.213938	0.830596	0.935945	NS	NS	NS
S17_Alistipes	Pastry_Cream	205	205	-0.0651555	0.556024	-0.0225744	0.199625	0.910078	0.977491	Pastry_Cream	126	126	0.0592037	0.832987	-0.19516	0.138669	0.161898	0.578077	Pastry_Cream	223	223	-0.0509842	0.476141	0.160567	0.128619	0.213233	0.77297	Pastry_Cream	871	871	0.0200538	0.596495	-0.00961618	0.0519048	0.853064	0.916254	Pastry_Cream	25.0941	52.0049	60.449	371.18	0.0443361	-0.00900089	-0.203015	0.839123	0.935945	NS	NS	NS
S9_Bacteroides, Roseburia	Pastry_Cream	205	205	-0.0651555	0.556024	0.000899601	0.0481262	0.985105	0.985105	Pastry_Cream	126	126	0.0592037	0.832987	0.0307994	0.048069	0.522917	0.842478	Pastry_Cream	223	223	-0.0509842	0.476141	0.0780095	0.052458	0.138444	0.77297	Pastry_Cream	871	871	0.0200538	0.596495	-0.00945999	0.0186968	0.613008	0.884679	Pastry_Cream	431.755	432.783	363.393	2860.65	0.0156392	0.0036698	0.234654	0.814477	0.935945	NS	NS	NS
S5_Streptococcus, Bifidobacterium dentium	Bread_Legumes	205	205	-0.0736819	0.691941	-0.0492745	0.0490908	0.316807	0.676358	Bread_Legumes	126	126	0.0277121	0.583927	-0.0860836	0.0677831	0.206794	0.579322	Bread_Legumes	223	223	-0.116311	0.444079	-0.00882465	0.0301703	0.770227	0.935336	Bread_Legumes	871	871	0.0435099	0.579569	0.00687367	0.013926	0.621731	0.916912	Bread_Legumes	414.953	217.649	1098.61	5156.44	0.0120494	-0.00195042	-0.161869	0.871409	0.935958	NS	NS	NS
S1_Acetate/butyrate producers	Icecream_Beer_non-alcoholic	205	205	-0.119788	0.542039	0.0803301	0.0669078	0.23133	0.753652	Icecream_Beer_non-alcoholic	126	126	-0.0410161	0.57799	0.0180236	0.0471058	0.702697	0.886009	Icecream_Beer_non-alcoholic	223	223	-0.0245111	0.517043	-0.0408785	0.033548	0.22436	0.67146	Icecream_Beer_non-alcoholic	871	871	0.0407092	0.884625	0.00452391	0.00884809	0.609282	0.883459	Icecream_Beer_non-alcoholic	223.381	450.662	888.521	12773.2	0.00835197	0.0033155	0.396972	0.691388	0.936204	NS	NS	NS
S10_Bacteroides eggerthii	Icecream_Beer_non-alcoholic	205	205	-0.119788	0.542039	0.0251807	0.159143	0.874439	0.963033	Icecream_Beer_non-alcoholic	126	126	-0.0410161	0.57799	-0.0226936	0.228197	0.920949	0.920949	Icecream_Beer_non-alcoholic	223	223	-0.0245111	0.517043	-0.044148	0.100512	0.66093	0.958348	Icecream_Beer_non-alcoholic	871	871	0.0407092	0.884625	-0.00868364	0.0350515	0.804395	0.89721	Icecream_Beer_non-alcoholic	39.4842	19.2035	98.9847	813.928	0.0320816	-0.0111974	-0.349028	0.727068	0.936204	NS	NS	NS
S13_Escherichia coli, Bacteroides fragilis	Icecream_Beer_non-alcoholic	205	205	-0.119788	0.542039	-0.0909203	0.088856	0.307493	0.753652	Icecream_Beer_non-alcoholic	126	126	-0.0410161	0.57799	-0.0326382	0.0715437	0.649099	0.886009	Icecream_Beer_non-alcoholic	223	223	-0.0245111	0.517043	0.0570878	0.0414452	0.169852	0.67146	Icecream_Beer_non-alcoholic	871	871	0.0407092	0.884625	-0.00782536	0.0145163	0.589975	0.883459	Icecream_Beer_non-alcoholic	126.656	195.37	582.173	4745.6	0.013304	-0.00385733	-0.289937	0.771865	0.936204	NS	NS	NS
S17_Alistipes	Icecream_Beer_non-alcoholic	205	205	-0.119788	0.542039	0.180112	0.197887	0.363832	0.753652	Icecream_Beer_non-alcoholic	126	126	-0.0410161	0.57799	-0.117159	0.166897	0.484047	0.877335	Icecream_Beer_non-alcoholic	223	223	-0.0245111	0.517043	0.0771632	0.114853	0.502397	0.855517	Icecream_Beer_non-alcoholic	871	871	0.0407092	0.884625	-0.0190121	0.033039	0.565141	0.883459	Icecream_Beer_non-alcoholic	25.5367	35.9008	75.8085	916.106	0.0308115	-0.0106082	-0.344292	0.730627	0.936204	NS	NS	NS
S20_Lactococcus lactis	Icecream_Beer_non-alcoholic	205	205	-0.119788	0.542039	-0.13218	0.085129	0.122084	0.590074	Icecream_Beer_non-alcoholic	126	126	-0.0410161	0.57799	-0.0281567	0.149963	0.851384	0.887199	Icecream_Beer_non-alcoholic	223	223	-0.0245111	0.517043	0.0754864	0.0629063	0.231538	0.67146	Icecream_Beer_non-alcoholic	871	871	0.0407092	0.884625	0.00409651	0.0155631	0.792448	0.89721	Icecream_Beer_non-alcoholic	137.989	44.4665	252.704	4128.67	0.0148025	0.00361483	0.244204	0.807073	0.936204	NS	NS	NS
S22_Mucin degraders	Icecream_Beer_non-alcoholic	205	205	-0.119788	0.542039	0.0419051	0.0529837	0.42995	0.789801	Icecream_Beer_non-alcoholic	126	126	-0.0410161	0.57799	-0.0376964	0.0751632	0.616927	0.886009	Icecream_Beer_non-alcoholic	223	223	-0.0245111	0.517043	0.0687222	0.0696201	0.324718	0.855517	Icecream_Beer_non-alcoholic	871	871	0.0407092	0.884625	-0.0146923	0.018693	0.432097	0.883459	Icecream_Beer_non-alcoholic	356.218	177.006	206.315	2861.82	0.0166635	-0.00544612	-0.326829	0.743797	0.936204	NS	NS	NS
S25_Lachnospiraceae bacterium 3 1 57FAA	Icecream_Beer_non-alcoholic	205	205	-0.119788	0.542039	0.0982571	0.13962	0.482412	0.789801	Icecream_Beer_non-alcoholic	126	126	-0.0410161	0.57799	-0.0618068	0.110792	0.577978	0.886009	Icecream_Beer_non-alcoholic	223	223	-0.0245111	0.517043	-0.0628387	0.0872763	0.472301	0.855517	Icecream_Beer_non-alcoholic	871	871	0.0407092	0.884625	0.0428942	0.0418924	0.306162	0.883459	Icecream_Beer_non-alcoholic	51.2987	81.4668	131.283	569.809	0.0346301	0.0194244	0.56091	0.574859	0.936204	NS	NS	NS
S27_Turicibacter_sanguinis	Icecream_Beer_non-alcoholic	205	205	-0.119788	0.542039	0.0838318	0.0529731	0.115115	0.590074	Icecream_Beer_non-alcoholic	126	126	-0.0410161	0.57799	-0.165268	0.149353	0.270698	0.808028	Icecream_Beer_non-alcoholic	223	223	-0.0245111	0.517043	-0.0148334	0.0238491	0.534737	0.855517	Icecream_Beer_non-alcoholic	871	871	0.0407092	0.884625	0.0241578	0.023657	0.307479	0.883459	Icecream_Beer_non-alcoholic	356.361	44.8304	1758.15	1786.81	0.0159189	0.0100228	0.629615	0.528947	0.936204	NS	NS	NS
S4_Bifidobacterium_catenulatum	Icecream_Beer_non-alcoholic	205	205	-0.119788	0.542039	0.0793918	0.146005	0.587216	0.862958	Icecream_Beer_non-alcoholic	126	126	-0.0410161	0.57799	0.0184881	0.102096	0.856606	0.887199	Icecream_Beer_non-alcoholic	223	223	-0.0245111	0.517043	-0.161205	0.124409	0.196431	0.67146	Icecream_Beer_non-alcoholic	871	871	0.0407092	0.884625	-0.00811759	0.021023	0.699502	0.89721	Icecream_Beer_non-alcoholic	46.9097	95.9358	64.6095	2262.61	0.0201208	-0.00942665	-0.468502	0.639426	0.936204	NS	NS	NS
S6_Bifidobacterium_pseudocatenulatum	Icecream_Beer_non-alcoholic	205	205	-0.119788	0.542039	-0.00421444	0.172786	0.980565	0.980565	Icecream_Beer_non-alcoholic	126	126	-0.0410161	0.57799	0.19128	0.197342	0.334356	0.808028	Icecream_Beer_non-alcoholic	223	223	-0.0245111	0.517043	0.161314	0.121137	0.184368	0.67146	Icecream_Beer_non-alcoholic	871	871	0.0407092	0.884625	-0.00864787	0.0335782	0.79682	0.89721	Icecream_Beer_non-alcoholic	33.4951	25.6779	68.1466	886.92	0.0314	0.00797989	0.254137	0.79939	0.936204	NS	NS	NS
S23_B. hydrogenotrophica	Cheese_Butter	205	205	-0.0931494	0.425837	0.367317	0.220711	0.097637	0.707868	Cheese_Butter	126	126	-0.00880917	0.675371	0.0843514	0.209646	0.688141	0.958474	Cheese_Butter	223	223	-0.0538434	0.563146	-0.0475135	0.120743	0.694329	0.876842	Cheese_Butter	871	871	0.0356952	0.679706	0.000752205	0.0389413	0.984593	0.996117	Cheese_Butter	20.5283	22.7525	68.5929	659.447	0.0360066	0.00868192	0.24112	0.809462	0.93843	NS	NS	NS
S27_Turicibacter_sanguinis	Cheese_Butter	205	205	-0.0931494	0.425837	0.158138	0.0672497	0.0196751	0.285288	Cheese_Butter	126	126	-0.00880917	0.675371	0.17627	0.129135	0.174806	0.958474	Cheese_Butter	223	223	-0.0538434	0.563146	-0.0369403	0.0264296	0.163899	0.792179	Cheese_Butter	871	871	0.0356952	0.679706	-0.00648504	0.0319357	0.839135	0.901293	Cheese_Butter	221.116	59.9666	1431.59	980.498	0.0192694	-0.00508875	-0.264085	0.791715	0.93843	NS	NS	NS
S7_Alistipes, Bacteroides	Cheese_Butter	205	205	-0.0931494	0.425837	0.0228142	0.0782255	0.770861	0.931457	Cheese_Butter	126	126	-0.00880917	0.675371	0.0422292	0.0532371	0.42921	0.958474	Cheese_Butter	223	223	-0.0538434	0.563146	0.00870404	0.0468735	0.85286	0.936194	Cheese_Butter	871	871	0.0356952	0.679706	-0.0131227	0.0194706	0.500507	0.838447	Cheese_Butter	163.419	352.835	455.141	2637.8	0.0166454	-0.00333184	-0.200165	0.841351	0.93843	NS	NS	NS
S4_Bifidobacterium_catenulatum	Cheese_Butter	205	205	-0.0931494	0.425837	-0.203483	0.186322	0.276108	0.931457	Cheese_Butter	126	126	-0.00880917	0.675371	-0.038827	0.0884491	0.661469	0.958474	Cheese_Butter	223	223	-0.0538434	0.563146	-0.187503	0.116201	0.108066	0.792179	Cheese_Butter	871	871	0.0356952	0.679706	0.0241037	0.0279411	0.388578	0.838447	Cheese_Butter	28.8052	127.824	74.0589	1280.89	0.0257208	0.00407754	0.158531	0.874039	0.938782	NS	NS	NS
S21_Clostridium bolteae, Coprobacillus	Savoury_snacks	205	205	-0.0114351	0.501597	-0.257244	0.132476	0.0535927	0.777095	Savoury_snacks	126	126	0.0331572	0.582506	0.0357554	0.0574276	0.534849	0.816348	Savoury_snacks	223	223	-0.010086	0.411775	0.0364861	0.0438139	0.405983	0.623876	Savoury_snacks	871	871	0.000932337	0.495994	-0.00142926	0.0163733	0.93046	0.972927	Savoury_snacks	56.9803	303.221	520.926	3730.16	0.0147261	0.00213804	0.145187	0.884563	0.939278	NS	NS	NS
S25_Lachnospiraceae bacterium 3 1 57FAA	Savoury_snacks	205	205	-0.0114351	0.501597	0.0250151	0.156469	0.873143	0.976642	Savoury_snacks	126	126	0.0331572	0.582506	-0.0731089	0.114881	0.525737	0.816348	Savoury_snacks	223	223	-0.010086	0.411775	-0.0595797	0.112093	0.595602	0.690898	Savoury_snacks	871	871	0.000932337	0.495994	0.0736709	0.0795445	0.354622	0.688187	Savoury_snacks	40.8456	75.7707	79.5872	158.045	0.0531308	0.00672902	0.12665	0.899217	0.939278	NS	NS	NS
S3_Faecalibacterium_prausnitzii_Bifidobacterium_bifidum	Savoury_snacks	205	205	-0.0114351	0.501597	-0.0069589	0.103812	0.946622	0.976642	Savoury_snacks	126	126	0.0331572	0.582506	-0.112122	0.162319	0.491068	0.816348	Savoury_snacks	223	223	-0.010086	0.411775	-0.0970615	0.10801	0.369853	0.623876	Savoury_snacks	871	871	0.000932337	0.495994	0.0247728	0.0490854	0.613907	0.847776	Savoury_snacks	92.7909	37.9541	85.7178	415.046	0.0397933	-0.00465436	-0.116963	0.906889	0.939278	NS	NS	NS
S21_Clostridium bolteae, Coprobacillus	Icecream_Beer_non-alcoholic	205	205	-0.119788	0.542039	-0.126365	0.115165	0.273879	0.753652	Icecream_Beer_non-alcoholic	126	126	-0.0410161	0.57799	-0.00971113	0.0529261	0.854762	0.887199	Icecream_Beer_non-alcoholic	223	223	-0.0245111	0.517043	-0.00529971	0.0334922	0.87443	0.995352	Icecream_Beer_non-alcoholic	871	871	0.0407092	0.884625	-0.000274293	0.0103843	0.978933	0.985148	Icecream_Beer_non-alcoholic	75.3976	356.993	891.481	9273.55	0.00971404	-0.00191204	-0.196832	0.843959	0.941339	NS	NS	NS
S10_Bacteroides eggerthii	Pastry_Cream	205	205	-0.0651555	0.556024	0.199662	0.159596	0.212387	0.910744	Pastry_Cream	126	126	0.0592037	0.832987	0.0251049	0.190762	0.895518	0.976616	Pastry_Cream	223	223	-0.0509842	0.476141	0.0370021	0.112867	0.743351	0.901239	Pastry_Cream	871	871	0.0200538	0.596495	-0.0271461	0.0550513	0.622063	0.884679	Pastry_Cream	39.2603	27.48	78.4988	329.963	0.0458734	0.0052106	0.113587	0.909566	0.94205	NS	NS	NS
S8_Eggerthella lenta, Gordonibacter pamelaeae	Pastry_Cream	205	205	-0.0651555	0.556024	-0.084078	0.112833	0.457066	0.916899	Pastry_Cream	126	126	0.0592037	0.832987	-0.0370665	0.0917697	0.687024	0.905623	Pastry_Cream	223	223	-0.0509842	0.476141	-0.0603554	0.0835018	0.47059	0.802771	Pastry_Cream	871	871	0.0200538	0.596495	0.0295516	0.034503	0.391966	0.837149	Pastry_Cream	78.5469	118.741	143.42	840.015	0.0291022	0.00437212	0.150233	0.880581	0.94205	NS	NS	NS
S7_Alistipes, Bacteroides	Dairy_Cereals	205	205	-0.161259	0.558239	-0.0395782	0.0634159	0.533273	0.736425	Dairy_Cereals	126	126	-0.0521211	0.621192	-0.0160538	0.0574376	0.780343	0.958129	Dairy_Cereals	223	223	-0.0111794	0.671357	0.0160505	0.0407388	0.693979	0.919942	Dairy_Cereals	871	871	0.0462207	0.622802	-0.00392117	0.021473	0.855148	0.861143	Dairy_Cereals	248.659	303.115	602.537	2168.77	0.0173472	-0.00407475	-0.234894	0.814291	0.944578	NS	NS	NS
S29_Sutterella wadsworthensis	Sweetened_tea_yoghurtdrink	205	205	0.111425	1.12755	-0.0446676	0.0587658	0.448145	0.910507	Sweetened_tea_yoghurtdrink	126	126	0.0674218	0.540567	-0.18725	0.102485	0.0704468	0.408591	Sweetened_tea_yoghurtdrink	223	223	0.00250442	0.480442	-0.105923	0.0832969	0.204866	0.734174	Sweetened_tea_yoghurtdrink	871	871	-0.0373747	0.434722	0.0379228	0.0273461	0.16589	0.801801	Sweetened_tea_yoghurtdrink	289.568	95.2095	144.126	1337.24	0.0231487	0.0025097	0.108417	0.913665	0.946296	NS	NS	NS
S10_Bacteroides eggerthii	Cheese_Butter	205	205	-0.0931494	0.425837	-0.0439266	0.203533	0.829349	0.944632	Cheese_Butter	126	126	-0.00880917	0.675371	-0.159483	0.197297	0.420497	0.958474	Cheese_Butter	223	223	-0.0538434	0.563146	-0.0269083	0.0941029	0.775192	0.936194	Cheese_Butter	871	871	0.0356952	0.679706	0.0219077	0.0464777	0.637503	0.838447	Cheese_Butter	24.1395	25.6896	112.926	462.925	0.0399783	0.00310949	0.0777795	0.938003	0.947348	NS	NS	NS
S9_Bacteroides, Roseburia	Cheese_Butter	205	205	-0.0931494	0.425837	0.00569875	0.0614472	0.926202	0.959281	Cheese_Butter	126	126	-0.00880917	0.675371	-0.0246408	0.0498819	0.622222	0.958474	Cheese_Butter	223	223	-0.0538434	0.563146	-0.0429394	0.0438596	0.328661	0.836161	Cheese_Butter	871	871	0.0356952	0.679706	0.00646726	0.0157856	0.682133	0.838447	Cheese_Butter	264.848	401.896	519.84	4013.06	0.013868	-0.000915805	-0.0660374	0.947348	0.947348	NS	NS	NS
S22_Mucin degraders	Spreads_sweet	205	205	-0.0555374	0.536875	-0.0949527	0.0588282	0.108113	0.400541	Spreads_sweet	126	126	0.0129582	0.465282	-0.0064652	0.0979646	0.947492	0.978735	Spreads_sweet	223	223	-0.0241369	0.470388	-0.102736	0.0822231	0.212867	0.617316	Spreads_sweet	871	871	0.0180257	0.519839	0.04946	0.0327226	0.13103	0.379988	Spreads_sweet	288.954	104.198	147.915	933.908	0.026038	0.00195547	0.0751007	0.940135	0.9476	NS	NS	NS
S7_Alistipes, Bacteroides	Spreads_sweet	205	205	-0.0555374	0.536875	-0.152284	0.0648675	0.0198761	0.32664	Spreads_sweet	126	126	0.0129582	0.465282	0.00502119	0.0801487	0.950151	0.978735	Spreads_sweet	223	223	-0.0241369	0.470388	-0.0370972	0.0588622	0.529202	0.807729	Spreads_sweet	871	871	0.0180257	0.519839	0.0282261	0.025612	0.27074	0.53176	Spreads_sweet	237.654	155.671	288.62	1524.45	0.0212892	-0.00139914	-0.0657207	0.9476	0.9476	NS	NS	NS
S21_Clostridium bolteae, Coprobacillus	Dairy_lf	205	205	-0.0789894	0.503158	0.0706391	0.126279	0.576534	0.953416	Dairy_lf	126	126	-0.0346258	0.518191	-0.103921	0.066643	0.121834	0.538781	Dairy_lf	223	223	0.0070026	0.453292	0.0128763	0.037547	0.732007	0.774319	Dairy_lf	871	871	0.0221807	0.682257	0.00434707	0.0109558	0.691629	0.887984	Dairy_lf	62.7105	225.16	709.332	8331.33	0.0103536	0.00282803	0.273143	0.784743	0.948231	NS	NS	NS
S20_Lactococcus lactis	Fruit_Juice_Milk	205	205	0.0499406	0.971662	-0.00373104	0.0491995	0.939627	0.973185	Fruit_Juice_Milk	126	126	0.0470696	0.883709	-0.0760411	0.117451	0.518592	0.986097	Fruit_Juice_Milk	223	223	-0.0460608	0.585582	-0.048374	0.0593853	0.416263	0.958707	Fruit_Juice_Milk	871	871	-0.00752221	0.66348	0.00385702	0.0215577	0.858048	0.968309	Fruit_Juice_Milk	413.122	72.4911	283.558	2151.77	0.0185028	-0.00426954	-0.23075	0.817509	0.94831	NS	NS	NS
S1_Acetate/butyrate producers	Meat_Potatoes_Gravy	205	205	0.0092388	0.66643	-0.0211079	0.0646686	0.744464	0.841698	Meat_Potatoes_Gravy	126	126	0.0317397	0.612627	-0.0849852	0.0527948	0.110153	0.448366	Meat_Potatoes_Gravy	223	223	-0.12186	0.546907	0.0140352	0.0375832	0.709185	0.822655	Meat_Potatoes_Gravy	871	871	0.0247565	0.537179	0.00596738	0.0167235	0.721309	0.909477	Meat_Potatoes_Gravy	239.119	358.771	707.966	3575.59	0.0143128	-0.000873554	-0.0610329	0.951333	0.954008	NS	NS	NS
S24_Ruminococcus S24_Ruminococcus gnavus, Lachnospiraceae bacterium 1 1 57FAA, Lachnospiraceae bacterium	Meat_Potatoes_Gravy	205	205	0.0092388	0.66643	-0.0741354	0.145411	0.610739	0.841698	Meat_Potatoes_Gravy	126	126	0.0317397	0.612627	-0.119459	0.120115	0.322033	0.515934	Meat_Potatoes_Gravy	223	223	-0.12186	0.546907	0.0242582	0.0429384	0.572721	0.822655	Meat_Potatoes_Gravy	871	871	0.0247565	0.537179	0.000776373	0.0212285	0.970835	0.981688	Meat_Potatoes_Gravy	47.2939	69.3114	542.385	2219.03	0.0186403	0.00107506	0.0576739	0.954008	0.954008	NS	NS	NS
S17_Alistipes	Eggs_Alcoholic_drinks	205	205	-0.104303	0.43925	-0.296841	0.255094	0.245957	0.703885	Eggs_Alcoholic_drinks	126	126	-0.134042	0.302491	0.000750851	0.343895	0.998262	0.998262	Eggs_Alcoholic_drinks	223	223	-0.0546888	0.448173	0.0491816	0.132529	0.710925	0.888454	Eggs_Alcoholic_drinks	871	871	0.0583724	0.606478	0.0175994	0.0521944	0.736055	0.92807	Eggs_Alcoholic_drinks	15.3674	8.45566	56.9349	367.073	0.0472545	0.0105064	0.222337	0.824051	0.9559	NS	NS	NS
S7_Alistipes, Bacteroides	Eggs_Alcoholic_drinks	205	205	-0.104303	0.43925	0.129391	0.0784285	0.100562	0.703885	Eggs_Alcoholic_drinks	126	126	-0.134042	0.302491	-0.18297	0.125503	0.147482	0.610996	Eggs_Alcoholic_drinks	223	223	-0.0546888	0.448173	0.0609896	0.0576	0.290847	0.756933	Eggs_Alcoholic_drinks	871	871	0.0583724	0.606478	-0.00898878	0.0231963	0.698475	0.920717	Eggs_Alcoholic_drinks	162.574	63.4883	301.408	1858.49	0.0204724	0.00465069	0.227169	0.820292	0.9559	NS	NS	NS
S14_Odoribacter	Dairy_lf	205	205	-0.0789894	0.503158	0.146978	0.0875944	0.0950671	0.459491	Dairy_lf	126	126	-0.0346258	0.518191	-0.271709	0.187227	0.149327	0.538781	Dairy_lf	223	223	0.0070026	0.453292	-0.0832569	0.106367	0.434683	0.774319	Dairy_lf	871	871	0.0221807	0.682257	-0.0149351	0.0399852	0.708856	0.887984	Dairy_lf	130.331	28.5274	88.3866	625.464	0.0338505	-0.006068	-0.179259	0.857735	0.956704	NS	NS	NS
S7_Alistipes, Bacteroides	Dairy_lf	205	205	-0.0789894	0.503158	0.00648759	0.0667661	0.92269	0.953416	Dairy_lf	126	126	-0.0346258	0.518191	0.0673912	0.0688653	0.329749	0.734875	Dairy_lf	223	223	0.0070026	0.453292	-0.0854509	0.0559375	0.128065	0.774319	Dairy_lf	871	871	0.0221807	0.682257	-0.000272761	0.0188899	0.988483	0.988483	Dairy_lf	224.33	210.863	319.59	2802.47	0.0167665	-0.00348809	-0.208039	0.835198	0.956704	NS	NS	NS
S21_Clostridium bolteae, Coprobacillus	Rolls_Spreads	205	205	0.00970005	1.07387	-0.152369	0.116186	0.191247	0.62954	Rolls_Spreads	126	126	0.0143831	0.689611	-0.114656	0.122802	0.352558	0.979653	Rolls_Spreads	223	223	-0.16152	0.433979	-0.15009	0.0904858	0.0987479	0.409099	Rolls_Spreads	871	871	0.0374261	0.602796	0.0357292	0.0301916	0.236985	0.727649	Rolls_Spreads	74.0789	66.3119	122.135	1097.05	0.0271205	0.00145277	0.0535671	0.95728	0.95728	NS	NS	NS
S5_Streptococcus, Bifidobacterium dentium	Rolls_Spreads	205	205	0.00970005	1.07387	0.0450356	0.0531703	0.39808	0.733569	Rolls_Spreads	126	126	0.0143831	0.689611	-0.0519533	0.149093	0.728166	0.979653	Rolls_Spreads	223	223	-0.16152	0.433979	-0.0539359	0.0601965	0.371388	0.695868	Rolls_Spreads	871	871	0.0374261	0.602796	0.00345	0.028627	0.904105	0.957041	Rolls_Spreads	353.722	44.9866	275.967	1220.25	0.0229723	0.00154002	0.0670381	0.946551	0.95728	NS	NS	NS
S8_Eggerthella lenta, Gordonibacter pamelaeae	Rolls_Spreads	205	205	0.00970005	1.07387	-0.0948076	0.113542	0.404728	0.733569	Rolls_Spreads	126	126	0.0143831	0.689611	-0.314955	0.24928	0.208958	0.979653	Rolls_Spreads	223	223	-0.16152	0.433979	-0.125222	0.195293	0.522077	0.695868	Rolls_Spreads	871	871	0.0374261	0.602796	0.0812746	0.0763699	0.28753	0.727649	Rolls_Spreads	77.5693	16.0926	26.2196	171.457	0.058587	-0.00607801	-0.103743	0.917373	0.95728	NS	NS	NS
S11_Bacteroides faecis	Fruit_Juice_Milk	205	205	0.0499406	0.971662	-0.0168701	0.0773466	0.827566	0.973185	Fruit_Juice_Milk	126	126	0.0470696	0.883709	0.00431379	0.161291	0.978707	0.986097	Fruit_Juice_Milk	223	223	-0.0460608	0.585582	-0.0778207	0.124022	0.531006	0.958707	Fruit_Juice_Milk	871	871	-0.00752221	0.66348	0.0131204	0.0507312	0.795985	0.968309	Fruit_Juice_Milk	167.154	38.4398	65.0138	388.553	0.0389497	-0.00396797	-0.101874	0.918857	0.958196	NS	NS	NS
S18_Lactobacillus delbrueckii	Fruit_Juice_Milk	205	205	0.0499406	0.971662	0.102117	0.122659	0.40611	0.736074	Fruit_Juice_Milk	126	126	0.0470696	0.883709	-0.0628201	0.138088	0.649983	0.986097	Fruit_Juice_Milk	223	223	-0.0460608	0.585582	-0.0179707	0.0988667	0.855936	0.988375	Fruit_Juice_Milk	871	871	-0.00752221	0.66348	0.00173699	0.0437077	0.968309	0.968309	Fruit_Juice_Milk	66.466	52.443	102.306	523.462	0.0366451	0.00344254	0.0939427	0.925155	0.958196	NS	NS	NS
S24_Ruminococcus S24_Ruminococcus gnavus, Lachnospiraceae bacterium 1 1 57FAA, Lachnospiraceae bacterium	Fruit_Juice_Milk	205	205	0.0499406	0.971662	0.12117	0.0863639	0.162184	0.677861	Fruit_Juice_Milk	126	126	0.0470696	0.883709	0.0760556	0.0834817	0.364161	0.986097	Fruit_Juice_Milk	223	223	-0.0460608	0.585582	-0.0162702	0.0347755	0.640376	0.958707	Fruit_Juice_Milk	871	871	-0.00752221	0.66348	-0.000725869	0.0157171	0.963175	0.968309	Fruit_Juice_Milk	134.071	143.488	826.898	4048.14	0.0139311	0.0020895	0.149987	0.880774	0.958196	NS	NS	NS
S19_Streptococci, L. sakei	Sweetened_tea_yoghurtdrink	205	205	0.111425	1.12755	-0.0309134	0.0226309	0.173594	0.705866	Sweetened_tea_yoghurtdrink	126	126	0.0674218	0.540567	0.0673877	0.0923431	0.467051	0.768655	Sweetened_tea_yoghurtdrink	223	223	0.00250442	0.480442	0.160781	0.0697711	0.0221776	0.501058	Sweetened_tea_yoghurtdrink	871	871	-0.0373747	0.434722	0.0246082	0.0332266	0.459134	0.901398	Sweetened_tea_yoghurtdrink	1952.53	117.271	205.423	905.789	0.0177304	0.000899482	0.0507312	0.95954	0.95954	NS	NS	NS
S8_Eggerthella lenta, Gordonibacter pamelaeae	Savoury_snacks	205	205	-0.0114351	0.501597	-0.0718636	0.125651	0.568022	0.976642	Savoury_snacks	126	126	0.0331572	0.582506	0.019143	0.113568	0.866436	0.89738	Savoury_snacks	223	223	-0.010086	0.411775	0.0912534	0.095103	0.338379	0.613312	Savoury_snacks	871	871	0.000932337	0.495994	-0.00955394	0.0414144	0.81761	0.948428	Savoury_snacks	63.3382	77.5332	110.563	583.039	0.0346173	0.0017394	0.0502466	0.959926	0.959926	NS	NS	NS
S25_Lachnospiraceae bacterium 3 1 57FAA	Wine_Alcohol	205	205	-0.27214	0.559289	-0.0709711	0.13836	0.60856	0.860679	Wine_Alcohol	126	126	-0.21131	0.583969	0.188584	0.108	0.0833437	0.656491	Wine_Alcohol	223	223	-0.0117566	0.664384	-0.0333974	0.0670859	0.619108	0.934278	Wine_Alcohol	871	871	0.0981863	0.783786	0.0130055	0.0468375	0.78133	0.891516	Wine_Alcohol	52.2368	85.7341	222.196	455.84	0.0350068	0.0134416	0.38397	0.701001	0.961451	NS	NS	NS
S4_Bifidobacterium_catenulatum	Wine_Alcohol	205	205	-0.27214	0.559289	0.195503	0.144046	0.176248	0.638898	Wine_Alcohol	126	126	-0.21131	0.583969	0.0708937	0.100454	0.481724	0.87106	Wine_Alcohol	223	223	-0.0117566	0.664384	-0.0310722	0.0959148	0.746283	0.934278	Wine_Alcohol	871	871	0.0981863	0.783786	0.00139627	0.0238529	0.953336	0.987383	Wine_Alcohol	48.1943	99.0972	108.7	1757.59	0.0222851	0.00770966	0.345955	0.729377	0.961451	NS	NS	NS
S29_Sutterella wadsworthensis	Bread_Legumes	205	205	-0.0736819	0.691941	0.0511658	0.105494	0.628229	0.910931	Bread_Legumes	126	126	0.0277121	0.583927	0.00509644	0.10712	0.962141	0.962141	Bread_Legumes	223	223	-0.116311	0.444079	-0.0445752	0.0990493	0.653138	0.860954	Bread_Legumes	871	871	0.0435099	0.579569	-0.00247386	0.0230238	0.91446	0.947119	Bread_Legumes	89.856	87.1487	101.929	1886.45	0.0214898	-0.00192511	-0.0895824	0.928619	0.961784	NS	NS	NS
28_Haemophilus, Veillonella	Meat	205	205	0.0153272	0.592254	0.000992395	0.0470231	0.983187	0.9946	Meat	126	126	0.00509592	0.600788	0.0705682	0.0411924	0.0896111	0.691176	Meat	223	223	-0.0138947	0.560121	0.0138573	0.0245437	0.572985	0.802091	Meat	871	871	-0.0016754	0.624155	-0.00486537	0.0147891	0.742253	0.992103	Meat	452.249	589.339	1660.05	4572.08	0.0117252	0.00588368	0.501796	0.615811	0.962147	NS	NS	NS
S1_Acetate/butyrate producers	Meat	205	205	0.0153272	0.592254	-0.0359194	0.0641895	0.576393	0.891329	Meat	126	126	0.00509592	0.600788	0.012449	0.0467346	0.790418	0.958865	Meat	223	223	-0.0138947	0.560121	0.0206368	0.0319347	0.518824	0.802091	Meat	871	871	-0.0016754	0.624155	-0.00893259	0.0133906	0.504901	0.913222	Meat	242.701	457.85	980.559	5576.98	0.0117379	-0.00449143	-0.382645	0.701983	0.962147	NS	NS	NS
S10_Bacteroides eggerthii	Meat	205	205	0.0153272	0.592254	0.0392632	0.152232	0.796737	0.962724	Meat	126	126	0.00509592	0.600788	-0.186196	0.224846	0.409257	0.809849	Meat	223	223	-0.0138947	0.560121	-0.127158	0.0952476	0.183268	0.634441	Meat	871	871	-0.0016754	0.624155	0.00635772	0.0529113	0.904386	0.992103	Meat	43.151	19.7801	110.228	357.193	0.0434228	-0.0258963	-0.596375	0.550925	0.962147	NS	NS	NS
S12_Bacteroides finegoldii	Meat	205	205	0.0153272	0.592254	-0.194647	0.169641	0.252592	0.814157	Meat	126	126	0.00509592	0.600788	0.376292	0.185099	0.0442673	0.691176	Meat	223	223	-0.0138947	0.560121	0.0341389	0.118409	0.773382	0.934503	Meat	871	871	-0.0016754	0.624155	-0.0114433	0.0512469	0.823358	0.992103	Meat	34.7486	29.1871	71.3233	380.771	0.0440212	0.00445084	0.101107	0.919466	0.962147	NS	NS	NS
S14_Odoribacter	Meat	205	205	0.0153272	0.592254	-0.0111226	0.0730255	0.879109	0.9946	Meat	126	126	0.00509592	0.600788	-0.08153	0.166019	0.62426	0.905177	Meat	223	223	-0.0138947	0.560121	0.0303574	0.0886037	0.732234	0.934503	Meat	871	871	-0.0016754	0.624155	0.055952	0.0466752	0.230956	0.782022	Meat	187.522	36.2815	127.379	459.015	0.0351321	0.0302469	0.860947	0.389267	0.962147	NS	NS	NS
S17_Alistipes	Meat	205	205	0.0153272	0.592254	0.00128562	0.189706	0.9946	0.9946	Meat	126	126	0.00509592	0.600788	-0.112631	0.164927	0.495976	0.809849	Meat	223	223	-0.0138947	0.560121	0.0633171	0.109264	0.562862	0.802091	Meat	871	871	-0.0016754	0.624155	0.00222052	0.0498815	0.964503	0.992103	Meat	27.7868	36.7636	83.7614	401.903	0.0426318	0.00380027	0.0891418	0.928969	0.962147	NS	NS	NS
S18_Lactobacillus delbrueckii	Meat	205	205	0.0153272	0.592254	0.139807	0.204377	0.49473	0.890593	Meat	126	126	0.00509592	0.600788	0.177469	0.173328	0.307947	0.809849	Meat	223	223	-0.0138947	0.560121	-0.0247185	0.103098	0.810745	0.940464	Meat	871	871	-0.0016754	0.624155	-0.00424659	0.047247	0.928403	0.992103	Meat	23.9407	33.2859	94.0797	447.972	0.0408494	0.00838748	0.205327	0.837317	0.962147	NS	NS	NS
S2_Bifidobacterium animalis	Meat	205	205	0.0153272	0.592254	0.029656	0.0643577	0.645445	0.891329	Meat	126	126	0.00509592	0.600788	0.209886	0.187907	0.26624	0.809849	Meat	223	223	-0.0138947	0.560121	0.0198779	0.165	0.904221	0.956785	Meat	871	871	-0.0016754	0.624155	-0.055941	0.0562506	0.320259	0.782022	Meat	241.434	28.3213	36.7311	316.043	0.0400793	-0.00617709	-0.154122	0.877514	0.962147	NS	NS	NS
S21_Clostridium bolteae, Coprobacillus	Meat	205	205	0.0153272	0.592254	0.055065	0.110799	0.61976	0.891329	Meat	126	126	0.00509592	0.600788	-0.0422646	0.0550732	0.444503	0.809849	Meat	223	223	-0.0138947	0.560121	0.0675415	0.0318767	0.0353443	0.43198	Meat	871	871	-0.0016754	0.624155	-0.0121647	0.0130239	0.350562	0.782022	Meat	81.4568	329.7	984.135	5895.43	0.0117116	-0.00201567	-0.172109	0.863352	0.962147	NS	NS	NS
S22_Mucin degraders	Meat	205	205	0.0153272	0.592254	-0.0419777	0.0512581	0.413805	0.814157	Meat	126	126	0.00509592	0.600788	-0.070319	0.0740803	0.344429	0.809849	Meat	223	223	-0.0138947	0.560121	-0.0441018	0.0665223	0.508075	0.802091	Meat	871	871	-0.0016754	0.624155	0.0227412	0.0283011	0.421883	0.815641	Meat	380.605	182.219	225.978	1248.51	0.0221549	-0.00508699	-0.22961	0.818395	0.962147	NS	NS	NS
S23_B. hydrogenotrophica	Meat	205	205	0.0153272	0.592254	-0.106493	0.166061	0.522072	0.890593	Meat	126	126	0.00509592	0.600788	-0.121765	0.238853	0.611134	0.905177	Meat	223	223	-0.0138947	0.560121	0.150847	0.122305	0.218773	0.634441	Meat	871	871	-0.0016754	0.624155	0.00967241	0.0443251	0.827313	0.992103	Meat	36.2631	17.5282	66.8516	508.98	0.0398529	0.0143123	0.359127	0.7195	0.962147	NS	NS	NS
S24_Ruminococcus S24_Ruminococcus gnavus, Lachnospiraceae bacterium 1 1 57FAA, Lachnospiraceae bacterium	Meat	205	205	0.0153272	0.592254	0.128994	0.145901	0.377709	0.814157	Meat	126	126	0.00509592	0.600788	-0.0075326	0.0997412	0.93993	0.958865	Meat	223	223	-0.0138947	0.560121	0.0390945	0.0365781	0.286412	0.724278	Meat	871	871	-0.0016754	0.624155	0.00976836	0.017049	0.566827	0.913222	Meat	46.9768	100.52	747.41	3440.34	0.0151877	0.0157151	1.03472	0.3008	0.962147	NS	NS	NS
S25_Lachnospiraceae bacterium 3 1 57FAA	Meat	205	205	0.0153272	0.592254	-0.276981	0.132287	0.0375452	0.814157	Meat	126	126	0.00509592	0.600788	0.0427453	0.109545	0.697074	0.958865	Meat	223	223	-0.0138947	0.560121	0.0157042	0.0830998	0.850285	0.948395	Meat	871	871	-0.0016754	0.624155	0.000626453	0.0632744	0.992103	0.992103	Meat	57.1437	83.3328	144.81	249.772	0.0432314	-0.0183811	-0.42518	0.670705	0.962147	NS	NS	NS
S26_Roseburia	Meat	205	205	0.0153272	0.592254	0.0994036	0.1233	0.421116	0.814157	Meat	126	126	0.00509592	0.600788	-0.108325	0.125082	0.388243	0.809849	Meat	223	223	-0.0138947	0.560121	-0.0556839	0.0554644	0.316662	0.724278	Meat	871	871	-0.0016754	0.624155	0.0566623	0.0425647	0.183482	0.760138	Meat	65.7764	63.9164	325.066	551.951	0.0315172	0.0127033	0.403059	0.686905	0.962147	NS	NS	NS
S29_Sutterella wadsworthensis	Meat	205	205	0.0153272	0.592254	-0.00742424	0.111482	0.946974	0.9946	Meat	126	126	0.00509592	0.600788	-0.0100003	0.0978678	0.918802	0.958865	Meat	223	223	-0.0138947	0.560121	-0.0726945	0.073642	0.324676	0.724278	Meat	871	871	-0.0016754	0.624155	0.0227929	0.0201831	0.259101	0.782022	Meat	80.4616	104.405	184.395	2454.84	0.0188174	0.014485	0.769765	0.441439	0.962147	NS	NS	NS
S3_Faecalibacterium_prausnitzii_Bifidobacterium_bifidum	Meat	205	205	0.0153272	0.592254	0.080141	0.0883525	0.365478	0.814157	Meat	126	126	0.00509592	0.600788	0.257304	0.153042	0.0953346	0.691176	Meat	223	223	-0.0138947	0.560121	0.11143	0.079998	0.165087	0.634441	Meat	871	871	-0.0016754	0.624155	-0.0675284	0.0389562	0.083374	0.483569	Meat	128.104	42.695	156.258	658.94	0.0318465	-0.00591624	-0.185773	0.852622	0.962147	NS	NS	NS
S5_Streptococcus, Bifidobacterium dentium	Meat	205	205	0.0153272	0.592254	-0.0791382	0.0512436	0.124203	0.814157	Meat	126	126	0.00509592	0.600788	-0.00332815	0.0643783	0.958865	0.958865	Meat	223	223	-0.0138947	0.560121	0.0283118	0.0219046	0.197751	0.634441	Meat	871	871	-0.0016754	0.624155	-0.00707067	0.0121559	0.560952	0.913222	Meat	380.82	241.28	2084.15	6767.5	0.010274	-0.00208839	-0.20327	0.838924	0.962147	NS	NS	NS
S6_Bifidobacterium_pseudocatenulatum	Meat	205	205	0.0153272	0.592254	0.00459743	0.165299	0.977839	0.9946	Meat	126	126	0.00509592	0.600788	0.27361	0.194153	0.161348	0.809849	Meat	223	223	-0.0138947	0.560121	-0.231431	0.11461	0.0446876	0.43198	Meat	871	871	-0.0016754	0.624155	0.0116043	0.0506863	0.818967	0.992103	Meat	36.5981	26.5283	76.1293	389.241	0.043499	-0.0107382	-0.246862	0.805015	0.962147	NS	NS	NS
S8_Eggerthella lenta, Gordonibacter pamelaeae	Meat	205	205	0.0153272	0.592254	0.0287209	0.108301	0.791136	0.962724	Meat	126	126	0.00509592	0.600788	0.0104999	0.108503	0.923075	0.958865	Meat	223	223	-0.0138947	0.560121	0.111918	0.0710474	0.116673	0.634441	Meat	871	871	-0.0016754	0.624155	0.0100226	0.0328265	0.760197	0.992103	Meat	85.2586	84.9414	198.109	928.004	0.0277744	0.0268559	0.966928	0.33358	0.962147	NS	NS	NS
S9_Bacteroides, Roseburia	Meat	205	205	0.0153272	0.592254	-0.0582467	0.0455259	0.202247	0.814157	Meat	126	126	0.00509592	0.600788	-0.0189369	0.0568861	0.739798	0.958865	Meat	223	223	-0.0138947	0.560121	-0.01315	0.0446561	0.768679	0.934503	Meat	871	871	-0.0016754	0.624155	0.00299818	0.01797	0.867532	0.992103	Meat	482.483	309.02	501.462	3096.73	0.0150933	-0.00712229	-0.471885	0.637009	0.962147	NS	NS	NS
S3_Faecalibacterium_prausnitzii_Bifidobacterium_bifidum	Fruit_Juice_Milk	205	205	0.0499406	0.971662	-0.0545382	0.0535515	0.309719	0.677861	Fruit_Juice_Milk	126	126	0.0470696	0.883709	0.00423139	0.125842	0.973233	0.986097	Fruit_Juice_Milk	223	223	-0.0460608	0.585582	0.132165	0.0763269	0.0847862	0.518905	Fruit_Juice_Milk	871	871	-0.00752221	0.66348	-0.00293177	0.0361152	0.935319	0.968309	Fruit_Juice_Milk	348.704	63.1468	171.65	766.692	0.0272146	0.0012501	0.0459348	0.963362	0.963362	NS	NS	NS
S13_Escherichia coli, Bacteroides fragilis	Pasta_Pizza	205	205	-0.126846	0.636288	-0.240434	0.0798698	0.00296218	0.0286344	Pasta_Pizza	126	126	-0.0709619	0.607965	0.0486447	0.0806469	0.547566	0.989316	Pasta_Pizza	223	223	0.00315542	0.506156	0.0952377	0.049705	0.0567221	0.37494	Pasta_Pizza	871	871	0.0399249	0.617093	-0.00869155	0.0212756	0.682993	0.936609	Pasta_Pizza	156.76	153.753	404.762	2209.2	0.0184917	-0.00371486	-0.200894	0.840782	0.966353	NS	NS	NS
S15_Parabacteroides johnsonii	Pasta_Pizza	205	205	-0.126846	0.636288	0.125819	0.179658	0.484542	0.726093	Pasta_Pizza	126	126	-0.0709619	0.607965	-0.221825	0.19424	0.25572	0.989316	Pasta_Pizza	223	223	0.00315542	0.506156	0.0983003	0.1184	0.407314	0.62169	Pasta_Pizza	871	871	0.0399249	0.617093	-0.0134169	0.0568725	0.813557	0.936609	Pasta_Pizza	30.9819	26.5048	71.3345	309.169	0.0477824	0.00201559	0.0421826	0.966353	0.966353	NS	NS	NS
S26_Roseburia	Pasta_Pizza	205	205	-0.126846	0.636288	-0.148317	0.117562	0.208598	0.405128	Pasta_Pizza	126	126	-0.0709619	0.607965	0.042291	0.1387	0.760977	0.989316	Pasta_Pizza	223	223	0.00315542	0.506156	-0.117172	0.0666325	0.0802595	0.37494	Pasta_Pizza	871	871	0.0399249	0.617093	0.0865613	0.046776	0.0645843	0.438792	Pasta_Pizza	72.3542	51.9812	225.231	457.039	0.0352103	0.00575024	0.163311	0.870273	0.966353	NS	NS	NS
S27_Turicibacter_sanguinis	Pasta_Pizza	205	205	-0.126846	0.636288	0.0617326	0.0490378	0.209549	0.405128	Pasta_Pizza	126	126	-0.0709619	0.607965	-0.00587745	0.163977	0.971467	0.989316	Pasta_Pizza	223	223	0.00315542	0.506156	-0.0293974	0.0296445	0.32267	0.550438	Pasta_Pizza	871	871	0.0399249	0.617093	0.00711194	0.0399868	0.858879	0.936609	Pasta_Pizza	415.852	37.1908	1137.92	625.413	0.0212412	-0.00160217	-0.0754278	0.939874	0.966353	NS	NS	NS
S29_Sutterella wadsworthensis	Pasta_Pizza	205	205	-0.126846	0.636288	0.146176	0.105098	0.165904	0.370095	Pasta_Pizza	126	126	-0.0709619	0.607965	-0.0619995	0.105562	0.55821	0.989316	Pasta_Pizza	223	223	0.00315542	0.506156	-0.0997848	0.0938721	0.28897	0.550438	Pasta_Pizza	871	871	0.0399249	0.617093	0.00423158	0.0227026	0.852184	0.936609	Pasta_Pizza	90.5342	89.7392	113.482	1940.22	0.0211573	0.00203965	0.0964041	0.9232	0.966353	NS	NS	NS
S7_Alistipes, Bacteroides	Meat	205	205	0.0153272	0.592254	-0.0236358	0.0584997	0.686623	0.905093	Meat	126	126	0.00509592	0.600788	-0.113568	0.0599478	0.060572	0.691176	Meat	223	223	-0.0138947	0.560121	0.0025841	0.0476326	0.956785	0.956785	Meat	871	871	-0.0016754	0.624155	0.0194439	0.0221591	0.380475	0.788127	Meat	292.208	278.262	440.749	2036.56	0.0181137	0.000731481	0.0403826	0.967788	0.967788	NS	NS	NS
S26_Roseburia	Bread_Legumes	205	205	-0.0736819	0.691941	0.12405	0.123002	0.314452	0.676358	Bread_Legumes	126	126	0.0277121	0.583927	0.0850327	0.135007	0.530028	0.739442	Bread_Legumes	223	223	-0.116311	0.444079	-0.0695915	0.0723787	0.337514	0.860954	Bread_Legumes	871	871	0.0435099	0.579569	-0.00150208	0.0483822	0.97524	0.97524	Bread_Legumes	66.0965	54.8641	190.888	427.198	0.0367844	-0.00143607	-0.0390402	0.968858	0.968858	NS	NS	NS
S10_Bacteroides eggerthii	Ready_meals	205	205	-0.0761095	0.668047	-0.115219	0.135338	0.395603	0.800861	Ready_meals	126	126	-0.0726462	0.963861	-0.0564467	0.144989	0.697733	0.982067	Ready_meals	223	223	0.0593805	0.744316	0.000558771	0.0702835	0.993664	0.993664	Ready_meals	871	871	0.0135936	0.640699	0.00621876	0.0511103	0.903186	0.96952	Ready_meals	54.5959	47.5694	202.438	382.81	0.0381409	-0.0094294	-0.247225	0.804734	0.972387	NS	NS	NS
S17_Alistipes	Ready_meals	205	205	-0.0761095	0.668047	-0.0657273	0.168868	0.697528	0.826175	Ready_meals	126	126	-0.0726462	0.963861	0.0768934	0.106089	0.469987	0.982067	Ready_meals	223	223	0.0593805	0.744316	-0.00734628	0.0803579	0.927244	0.993664	Ready_meals	871	871	0.0135936	0.640699	-0.023904	0.0481768	0.619899	0.96952	Ready_meals	35.0674	88.8497	154.861	430.848	0.0375392	-0.00973692	-0.25938	0.795342	0.972387	NS	NS	NS
S23_B. hydrogenotrophica	Ready_meals	205	205	-0.0761095	0.668047	0.075689	0.147932	0.609465	0.826175	Ready_meals	126	126	-0.0726462	0.963861	-0.00870179	0.153845	0.954988	0.982067	Ready_meals	223	223	0.0593805	0.744316	-0.0325021	0.0901683	0.718853	0.993664	Ready_meals	871	871	0.0135936	0.640699	-0.0135423	0.0428151	0.751854	0.96952	Ready_meals	45.6957	42.2508	122.996	545.515	0.0363586	-0.0109645	-0.301564	0.762984	0.972387	NS	NS	NS
S10_Bacteroides eggerthii	Eggs_Alcoholic_drinks	205	205	-0.104303	0.43925	-0.227967	0.204796	0.266991	0.703885	Eggs_Alcoholic_drinks	126	126	-0.134042	0.302491	0.46077	0.467374	0.32618	0.85993	Eggs_Alcoholic_drinks	223	223	-0.0546888	0.448173	0.05239	0.115894	0.651684	0.888454	Eggs_Alcoholic_drinks	871	871	0.0583724	0.606478	0.00578337	0.0553684	0.916834	0.949578	Eggs_Alcoholic_drinks	23.8428	4.57795	74.4524	326.194	0.0482766	0.00573588	0.118813	0.905424	0.976484	NS	NS	NS
S20_Lactococcus lactis	Eggs_Alcoholic_drinks	205	205	-0.104303	0.43925	0.0683012	0.110441	0.536991	0.706598	Eggs_Alcoholic_drinks	126	126	-0.134042	0.302491	-0.155186	0.30809	0.615393	0.986032	Eggs_Alcoholic_drinks	223	223	-0.0546888	0.448173	0.0176883	0.0725586	0.807646	0.925571	Eggs_Alcoholic_drinks	871	871	0.0583724	0.606478	-0.00274499	0.024674	0.911446	0.949578	Eggs_Alcoholic_drinks	81.9866	10.5353	189.943	1642.56	0.022792	0.00146275	0.0641781	0.948828	0.976484	NS	NS	NS
S26_Roseburia	Eggs_Alcoholic_drinks	205	205	-0.104303	0.43925	0.250271	0.164231	0.129154	0.703885	Eggs_Alcoholic_drinks	126	126	-0.134042	0.302491	-0.412558	0.253796	0.106735	0.610996	Eggs_Alcoholic_drinks	223	223	-0.0546888	0.448173	0.110988	0.0630164	0.0797873	0.535874	Eggs_Alcoholic_drinks	871	871	0.0583724	0.606478	-0.0594423	0.0445243	0.182219	0.660545	Eggs_Alcoholic_drinks	37.0759	15.525	251.822	504.436	0.0351612	0.00103647	0.0294775	0.976484	0.976484	NS	NS	NS
S9_Bacteroides, Roseburia	Eggs_Alcoholic_drinks	205	205	-0.104303	0.43925	0.0350699	0.0616261	0.56995	0.706598	Eggs_Alcoholic_drinks	126	126	-0.134042	0.302491	0.222846	0.11668	0.0585347	0.565836	Eggs_Alcoholic_drinks	223	223	-0.0546888	0.448173	-0.0321049	0.0541066	0.553556	0.844901	Eggs_Alcoholic_drinks	871	871	0.0583724	0.606478	-0.00334156	0.0188044	0.859	0.949578	Eggs_Alcoholic_drinks	263.312	73.4522	341.586	2828.01	0.0168878	0.00147913	0.0875858	0.930206	0.976484	NS	NS	NS
S11_Bacteroides faecis	Coffee_milk_Soup	205	205	-0.0190486	0.599621	0.178557	0.13194	0.177489	0.712566	Coffee_milk_Soup	126	126	0.00261508	0.755444	0.0393586	0.160573	0.806787	0.953261	Coffee_milk_Soup	223	223	-0.00397076	0.684592	-0.0426007	0.102985	0.679533	0.856802	Coffee_milk_Soup	871	871	0.00528062	0.524601	-0.0434137	0.0616703	0.481644	0.871681	Coffee_milk_Soup	57.4441	38.7842	94.2868	262.935	0.0469608	-0.00804527	-0.171319	0.863973	0.980373	NS	NS	NS
S15_Parabacteroides johnsonii	Coffee_milk_Soup	205	205	-0.0190486	0.599621	0.138732	0.191458	0.469546	0.80099	Coffee_milk_Soup	126	126	0.00261508	0.755444	-0.228187	0.138093	0.101065	0.953261	Coffee_milk_Soup	223	223	-0.00397076	0.684592	-0.0329031	0.0739783	0.656931	0.856802	Coffee_milk_Soup	871	871	0.00528062	0.524601	0.0353305	0.0577788	0.541044	0.871681	Coffee_milk_Soup	27.2804	52.4393	182.722	299.545	0.0421829	-0.00642421	-0.152294	0.878955	0.980373	NS	NS	NS
S1_Acetate/butyrate producers	Dairy_Cereals	205	205	-0.161259	0.558239	0.035585	0.0696324	0.609889	0.803945	Dairy_Cereals	126	126	-0.0521211	0.621192	-0.0259764	0.0439419	0.555558	0.958129	Dairy_Cereals	223	223	-0.0111794	0.671357	-0.0114608	0.0273317	0.675397	0.919942	Dairy_Cereals	871	871	0.0462207	0.622802	0.00504964	0.0129506	0.696695	0.808166	Dairy_Cereals	206.242	517.896	1338.65	5962.41	0.0111628	0.00107812	0.0965818	0.923059	0.980438	NS	NS	NS
S15_Parabacteroides johnsonii	Dairy_Cereals	205	205	-0.161259	0.558239	0.265606	0.201214	0.188346	0.65448	Dairy_Cereals	126	126	-0.0521211	0.621192	-0.00285355	0.166832	0.986382	0.986382	Dairy_Cereals	223	223	-0.0111794	0.671357	-0.100528	0.0792732	0.206112	0.919942	Dairy_Cereals	871	871	0.0462207	0.622802	0.02829	0.0497564	0.569796	0.739579	Dairy_Cereals	24.6993	35.9287	159.128	403.927	0.0400422	0.00302705	0.0755966	0.93974	0.980438	NS	NS	NS
S27_Turicibacter_sanguinis	Dairy_Cereals	205	205	-0.161259	0.558239	0.0174346	0.0552987	0.752879	0.873931	Dairy_Cereals	126	126	-0.0521211	0.621192	-0.21636	0.138682	0.121365	0.715198	Dairy_Cereals	223	223	-0.0111794	0.671357	-0.011801	0.0202731	0.561216	0.919942	Dairy_Cereals	871	871	0.0462207	0.622802	0.045062	0.0355115	0.204823	0.539989	Dairy_Cereals	327.017	51.9951	2433.09	792.981	0.0166549	0.000408381	0.0245201	0.980438	0.980438	NS	NS	NS
S9_Bacteroides, Roseburia	Dairy_Cereals	205	205	-0.161259	0.558239	-0.0626205	0.0494525	0.206902	0.65448	Dairy_Cereals	126	126	-0.0521211	0.621192	-0.0227259	0.0537092	0.672959	0.958129	Dairy_Cereals	223	223	-0.0111794	0.671357	0.0148255	0.0382009	0.698327	0.919942	Dairy_Cereals	871	871	0.0462207	0.622802	0.00570604	0.0174055	0.743119	0.828864	Dairy_Cereals	408.906	346.66	685.257	3300.88	0.0145222	-0.000946883	-0.0652023	0.948013	0.980438	NS	NS	NS
S27_Turicibacter_sanguinis	Coffee_milk_Soup	205	205	-0.0190486	0.599621	0.0470925	0.0523647	0.36957	0.765539	Coffee_milk_Soup	126	126	0.00261508	0.755444	-0.0222457	0.117244	0.849835	0.953261	Coffee_milk_Soup	223	223	-0.00397076	0.684592	-0.00414142	0.0183966	0.822138	0.911591	Coffee_milk_Soup	871	871	0.00528062	0.524601	0.00441727	0.0409919	0.914213	0.965634	Coffee_milk_Soup	364.689	72.7474	2954.78	595.118	0.0158365	0.00149163	0.0941892	0.924959	0.984403	NS	NS	NS
S5_Streptococcus, Bifidobacterium dentium	Coffee_milk_Soup	205	205	-0.0190486	0.599621	-0.00873261	0.0518978	0.866557	0.895957	Coffee_milk_Soup	126	126	0.00261508	0.755444	-0.0132131	0.0487419	0.78684	0.953261	Coffee_milk_Soup	223	223	-0.00397076	0.684592	0.022103	0.0169707	0.19435	0.735351	Coffee_milk_Soup	871	871	0.00528062	0.524601	-0.0122821	0.0136393	0.368125	0.855928	Coffee_milk_Soup	371.281	420.916	3472.16	5375.44	0.0101851	0.000199107	0.0195488	0.984403	0.984403	NS	NS	NS
S7_Alistipes, Bacteroides	Coffee_milk_Soup	205	205	-0.0190486	0.599621	-0.0965356	0.0598269	0.108202	0.627574	Coffee_milk_Soup	126	126	0.00261508	0.755444	-0.0146613	0.0480781	0.760935	0.953261	Coffee_milk_Soup	223	223	-0.00397076	0.684592	0.0262134	0.0378666	0.489518	0.806798	Coffee_milk_Soup	871	871	0.00528062	0.524601	0.00793706	0.024935	0.750327	0.965634	Coffee_milk_Soup	279.388	432.619	697.407	1608.35	0.0182036	-0.000751105	-0.0412614	0.967088	0.984403	NS	NS	NS
S12_Bacteroides finegoldii	Ready_meals	205	205	-0.0761095	0.668047	-0.0669165	0.151489	0.659169	0.826175	Ready_meals	126	126	-0.0726462	0.963861	0.0267036	0.121103	0.825855	0.982067	Ready_meals	223	223	0.0593805	0.744316	0.107247	0.0867293	0.217582	0.993664	Ready_meals	871	871	0.0135936	0.640699	-0.0355545	0.0494893	0.472687	0.932539	Ready_meals	43.5748	68.1847	132.944	408.299	0.039133	-0.00207365	-0.0529899	0.95774	0.985368	NS	NS	NS
S19_Streptococci, L. sakei	Ready_meals	205	205	-0.0761095	0.668047	-0.0588971	0.0373291	0.116315	0.564307	Ready_meals	126	126	-0.0726462	0.963861	0.0487553	0.0513606	0.344507	0.982067	Ready_meals	223	223	0.0593805	0.744316	0.0499987	0.045833	0.276572	0.993664	Ready_meals	871	871	0.0135936	0.640699	0.00174856	0.0238058	0.941465	0.96952	Ready_meals	717.638	379.088	476.04	1764.56	0.0173102	0.000929656	0.0537058	0.95717	0.985368	NS	NS	NS
S20_Lactococcus lactis	Ready_meals	205	205	-0.0761095	0.668047	0.00188379	0.0729601	0.979427	0.993308	Ready_meals	126	126	-0.0726462	0.963861	-0.0817672	0.0950594	0.391411	0.982067	Ready_meals	223	223	0.0593805	0.744316	0.0462407	0.0435573	0.28967	0.993664	Ready_meals	871	871	0.0135936	0.640699	-0.00752352	0.0226149	0.739463	0.96952	Ready_meals	187.858	110.665	527.082	1955.28	0.0189631	0.000347784	0.0183401	0.985368	0.985368	NS	NS	NS
S21_Clostridium bolteae, Coprobacillus	Ready_meals	205	205	-0.0761095	0.668047	-0.0508746	0.0985965	0.606444	0.826175	Ready_meals	126	126	-0.0726462	0.963861	0.0572565	0.0326202	0.082053	0.982067	Ready_meals	223	223	0.0593805	0.744316	0.00387375	0.0236131	0.869857	0.993664	Ready_meals	871	871	0.0135936	0.640699	-0.008193	0.0125636	0.514504	0.932539	Ready_meals	102.867	939.78	1793.48	6335.35	0.0104419	0.000394381	0.037769	0.969872	0.985368	NS	NS	NS
S26_Roseburia	Ready_meals	205	205	-0.0761095	0.668047	-0.204223	0.108059	0.0602523	0.564307	Ready_meals	126	126	-0.0726462	0.963861	0.0940179	0.0784584	0.233216	0.982067	Ready_meals	223	223	0.0593805	0.744316	-0.0098846	0.0391742	0.80106	0.993664	Ready_meals	871	871	0.0135936	0.640699	0.00297276	0.0413476	0.942701	0.96952	Ready_meals	85.6398	162.451	651.628	584.925	0.0259531	-0.00466012	-0.179559	0.857499	0.985368	NS	NS	NS
S14_Odoribacter	Fastfood	205	205	0.059247	0.613728	-0.0398017	0.10027	0.691869	0.836008	Fastfood	126	126	0.0181697	0.719587	0.150496	0.235262	0.52359	0.996213	Fastfood	223	223	-0.0641103	0.381483	0.19361	0.162109	0.233726	0.467502	Fastfood	871	871	8.79047e-06	0.532809	0.00525104	0.0752517	0.944385	0.978113	Fastfood	99.4631	18.0674	38.0528	176.591	0.0548678	0.0212388	0.38709	0.69869	0.985715	NS	NS	NS
S25_Lachnospiraceae bacterium 3 1 57FAA	Fastfood	205	205	0.059247	0.613728	-0.336017	0.183217	0.0681497	0.654703	Fastfood	126	126	0.0181697	0.719587	-0.201539	0.154349	0.19414	0.938342	Fastfood	223	223	-0.0641103	0.381483	-0.0584454	0.154383	0.705375	0.818235	Fastfood	871	871	8.79047e-06	0.532809	0.16055	0.101784	0.11508	0.44469	Fastfood	29.7899	41.9754	41.9565	96.5246	0.0689661	-0.0258018	-0.374122	0.708313	0.985715	NS	NS	NS
S29_Sutterella wadsworthensis	Fastfood	205	205	0.059247	0.613728	0.096148	0.151294	0.525868	0.744536	Fastfood	126	126	0.0181697	0.719587	0.0164595	0.131981	0.900984	0.996213	Fastfood	223	223	-0.0641103	0.381483	-0.111646	0.136944	0.415814	0.615024	Fastfood	871	871	8.79047e-06	0.532809	-0.0119966	0.0324866	0.712016	0.978113	Fastfood	43.6875	57.4085	53.3231	947.525	0.0301245	-0.0110487	-0.366766	0.713793	0.985715	NS	NS	NS
S7_Alistipes, Bacteroides	Fastfood	205	205	0.059247	0.613728	0.102673	0.0805234	0.203772	0.744536	Fastfood	126	126	0.0181697	0.719587	-0.19558	0.0844046	0.0221898	0.321752	Fastfood	223	223	-0.0641103	0.381483	-0.100058	0.0882536	0.258147	0.467502	Fastfood	871	871	8.79047e-06	0.532809	0.00856606	0.0357114	0.810489	0.978113	Fastfood	154.225	140.368	128.391	784.126	0.0287824	-0.0147029	-0.510831	0.60947	0.985715	NS	NS	NS
S8_Eggerthella lenta, Gordonibacter pamelaeae	Fastfood	205	205	0.059247	0.613728	-0.155584	0.148302	0.295416	0.744536	Fastfood	126	126	0.0181697	0.719587	-0.0181172	0.15435	0.906764	0.996213	Fastfood	223	223	-0.0641103	0.381483	-0.0664695	0.133092	0.617992	0.779207	Fastfood	871	871	8.79047e-06	0.532809	0.00795758	0.0525649	0.879707	0.978113	Fastfood	45.4681	41.9748	56.4545	361.916	0.0444636	-0.0172141	-0.387149	0.698646	0.985715	NS	NS	NS
S14_Odoribacter	Porridge_ready_Fish_fried_Chocolatemilk	205	205	0.0773975	0.762121	-0.0372246	0.0619107	0.548409	0.892969	Porridge_ready_Fish_fried_Chocolatemilk	126	126	0.129518	0.829902	-0.0725968	0.121077	0.549908	0.839333	Porridge_ready_Fish_fried_Chocolatemilk	223	223	-0.0295003	0.594099	0.100688	0.0838022	0.23094	0.786947	Porridge_ready_Fish_fried_Chocolatemilk	871	871	-0.0289628	0.569582	-0.00033339	0.0483705	0.994502	0.994502	Porridge_ready_Fish_fried_Chocolatemilk	260.897	68.2148	142.393	427.405	0.0333535	-0.000521978	-0.0156498	0.987514	0.987514	NS	NS	NS
S16_Propionate/succinate producers	Sugar_Sweets	205	205	0.184389	1.11711	-0.00834909	0.0277902	0.764179	0.93287	Sugar_Sweets	126	126	0.0308263	0.62208	-0.0238635	0.0917416	0.79522	0.951887	Sugar_Sweets	223	223	-0.0900997	0.489801	0.0698698	0.0871844	0.423792	0.64684	Sugar_Sweets	871	871	-0.0242716	0.577625	0.00979465	0.0441904	0.824642	0.92303	Sugar_Sweets	1294.84	118.814	131.56	512.087	0.0220471	0.000273037	0.0123843	0.990119	0.990119	NS	NS	NS
S18_Lactobacillus delbrueckii	Sugar_Sweets	205	205	0.184389	1.11711	-0.0805411	0.121306	0.507489	0.93287	Sugar_Sweets	126	126	0.0308263	0.62208	0.152029	0.166167	0.362067	0.749997	Sugar_Sweets	223	223	-0.0900997	0.489801	-0.151827	0.126017	0.229588	0.506409	Sugar_Sweets	871	871	-0.0242716	0.577625	0.0208332	0.0516512	0.686796	0.905322	Sugar_Sweets	67.9577	36.217	62.9711	374.833	0.0429545	-0.00317184	-0.0738419	0.941136	0.990119	NS	NS	NS
S21_Clostridium bolteae, Coprobacillus	Sugar_Sweets	205	205	0.184389	1.11711	-0.0189109	0.0656723	0.773683	0.93287	Sugar_Sweets	126	126	0.0308263	0.62208	0.0382727	0.0498697	0.444486	0.770708	Sugar_Sweets	223	223	-0.0900997	0.489801	0.0705533	0.0384356	0.0679058	0.246159	Sugar_Sweets	871	871	-0.0242716	0.577625	-0.0129418	0.014247	0.363938	0.879516	Sugar_Sweets	231.865	402.093	676.911	4926.69	0.0126617	-0.000801176	-0.0632754	0.949547	0.990119	NS	NS	NS
S27_Turicibacter_sanguinis	Sugar_Sweets	205	205	0.184389	1.11711	6.37928e-05	0.0302658	0.99832	0.99832	Sugar_Sweets	126	126	0.0308263	0.62208	-0.119446	0.141653	0.400777	0.770708	Sugar_Sweets	223	223	-0.0900997	0.489801	0.0210206	0.0294986	0.477003	0.660458	Sugar_Sweets	871	871	-0.0242716	0.577625	-0.027186	0.0396973	0.493645	0.894731	Sugar_Sweets	1091.68	49.8366	1149.2	634.567	0.0184891	0.000349537	0.018905	0.984917	0.990119	NS	NS	NS
S29_Sutterella wadsworthensis	Sugar_Sweets	205	205	0.184389	1.11711	-0.0171577	0.0650507	0.792253	0.93287	Sugar_Sweets	126	126	0.0308263	0.62208	-0.10376	0.0895822	0.249309	0.65727	Sugar_Sweets	223	223	-0.0900997	0.489801	0.216586	0.0893015	0.0161119	0.111693	Sugar_Sweets	871	871	-0.0242716	0.577625	-0.00890184	0.0220193	0.686117	0.905322	Sugar_Sweets	236.318	124.611	125.396	2062.49	0.0198075	-0.00321143	-0.162132	0.871202	0.990119	NS	NS	NS
S3_Faecalibacterium_prausnitzii_Bifidobacterium_bifidum	Sugar_Sweets	205	205	0.184389	1.11711	-0.0248285	0.0525033	0.636809	0.93287	Sugar_Sweets	126	126	0.0308263	0.62208	-0.190691	0.148095	0.200374	0.65727	Sugar_Sweets	223	223	-0.0900997	0.489801	0.0277352	0.0992347	0.780137	0.837925	Sugar_Sweets	871	871	-0.0242716	0.577625	0.0308362	0.0426624	0.470001	0.894731	Sugar_Sweets	362.766	45.5953	101.548	549.427	0.0307244	0.00194192	0.0632045	0.949604	0.990119	NS	NS	NS
S1_Acetate/butyrate producers	Fastfood	205	205	0.059247	0.613728	0.0230245	0.0887338	0.795535	0.887327	Fastfood	126	126	0.0181697	0.719587	0.00298869	0.0659281	0.963919	0.996213	Fastfood	223	223	-0.0641103	0.381483	0.087932	0.0591388	0.138506	0.453635	Fastfood	871	871	8.79047e-06	0.532809	-0.016227	0.0215164	0.450954	0.769275	Fastfood	127.005	230.07	285.927	2160.04	0.018888	-0.00224648	-0.118937	0.905325	0.994685	NS	NS	NS
S10_Bacteroides eggerthii	Fastfood	205	205	0.059247	0.613728	-0.355446	0.208831	0.0903038	0.654703	Fastfood	126	126	0.0181697	0.719587	-0.157166	0.319436	0.62361	0.996213	Fastfood	223	223	-0.0641103	0.381483	-0.0305369	0.177709	0.863726	0.927706	Fastfood	871	871	8.79047e-06	0.532809	0.0496627	0.0852204	0.560209	0.90256	Fastfood	22.9302	9.80013	31.6652	137.693	0.0703443	-0.0188998	-0.268676	0.788179	0.994685	NS	NS	NS
S11_Bacteroides faecis	Fastfood	205	205	0.059247	0.613728	0.0566497	0.177921	0.750516	0.870599	Fastfood	126	126	0.0181697	0.719587	0.0712072	0.288023	0.805154	0.996213	Fastfood	223	223	-0.0641103	0.381483	-0.00245962	0.240561	0.991852	0.991852	Fastfood	871	871	8.79047e-06	0.532809	-0.0191724	0.0883436	0.828243	0.978113	Fastfood	31.5898	12.0544	17.2803	128.13	0.0727289	0.000787395	0.0108264	0.991362	0.994685	NS	NS	NS
S12_Bacteroides finegoldii	Fastfood	205	205	0.059247	0.613728	-0.234532	0.234548	0.318558	0.744536	Fastfood	126	126	0.0181697	0.719587	-0.00126964	0.266966	0.996213	0.996213	Fastfood	223	223	-0.0641103	0.381483	-0.0460417	0.220055	0.834467	0.927706	Fastfood	871	871	8.79047e-06	0.532809	0.0117734	0.0825566	0.886632	0.978113	Fastfood	18.1776	14.031	20.6508	146.722	0.0707847	-0.0175588	-0.24806	0.804088	0.994685	NS	NS	NS
S16_Propionate/succinate producers	Fastfood	205	205	0.059247	0.613728	0.122232	0.0658202	0.0648669	0.654703	Fastfood	126	126	0.0181697	0.719587	-0.0635723	0.135736	0.640383	0.996213	Fastfood	223	223	-0.0641103	0.381483	-0.154976	0.133849	0.248223	0.467502	Fastfood	871	871	8.79047e-06	0.532809	-0.0692806	0.0652485	0.288626	0.566579	Fastfood	230.824	54.276	55.8175	234.887	0.0416737	-0.0002776	-0.00666127	0.994685	0.994685	NS	NS	NS
S18_Lactobacillus delbrueckii	Fastfood	205	205	0.059247	0.613728	-0.302281	0.281869	0.284832	0.744536	Fastfood	126	126	0.0181697	0.719587	0.235089	0.245929	0.341034	0.988999	Fastfood	223	223	-0.0641103	0.381483	0.192693	0.191163	0.314574	0.506814	Fastfood	871	871	8.79047e-06	0.532809	-0.0223024	0.0761083	0.769565	0.978113	Fastfood	12.5865	16.5341	27.3649	172.638	0.066064	0.00656894	0.0994329	0.920795	0.994685	NS	NS	NS
S26_Roseburia	Fastfood	205	205	0.059247	0.613728	-0.138379	0.168721	0.413125	0.744536	Fastfood	126	126	0.0181697	0.719587	-0.177844	0.173552	0.307603	0.988999	Fastfood	223	223	-0.0641103	0.381483	0.0566005	0.0979666	0.564108	0.743597	Fastfood	871	871	8.79047e-06	0.532809	0.0286814	0.0683098	0.674686	0.978113	Fastfood	35.1285	33.2003	104.194	214.306	0.0508441	0.00330506	0.0650037	0.948171	0.994685	NS	NS	NS
S3_Faecalibacterium_prausnitzii_Bifidobacterium_bifidum	Fastfood	205	205	0.059247	0.613728	-0.000361626	0.122418	0.997646	0.997646	Fastfood	126	126	0.0181697	0.719587	0.123336	0.219369	0.575017	0.996213	Fastfood	223	223	-0.0641103	0.381483	-0.112787	0.148812	0.44933	0.620504	Fastfood	871	871	8.79047e-06	0.532809	-0.00523655	0.062901	0.933672	0.978113	Fastfood	66.728	20.7801	45.157	252.746	0.0509375	-0.0100616	-0.197527	0.843415	0.994685	NS	NS	NS
S20_Lactococcus lactis	Pastry_Cream	205	205	-0.0651555	0.556024	-0.0734185	0.0860613	0.394632	0.910744	Pastry_Cream	126	126	0.0592037	0.832987	0.420497	0.119364	0.000604881	0.0175415	Pastry_Cream	223	223	-0.0509842	0.476141	-0.00312696	0.0709629	0.964896	0.964896	Pastry_Cream	871	871	0.0200538	0.596495	-0.0112884	0.0244861	0.644915	0.884679	Pastry_Cream	135.016	70.1868	198.581	1667.87	0.0219706	7.34675e-05	0.0033439	0.997332	0.997332	NS	NS	NS
S14_Odoribacter	Icecream_Beer_non-alcoholic	205	205	-0.119788	0.542039	0.074816	0.0793273	0.346857	0.753652	Icecream_Beer_non-alcoholic	126	126	-0.0410161	0.57799	-0.198448	0.167211	0.237646	0.808028	Icecream_Beer_non-alcoholic	223	223	-0.0245111	0.517043	-0.0549856	0.0943102	0.560511	0.855517	Icecream_Beer_non-alcoholic	871	871	0.0407092	0.884625	0.00122765	0.0308817	0.968299	0.985148	Icecream_Beer_non-alcoholic	158.911	35.7662	112.43	1048.57	0.0271595	-7.62391e-05	-0.00280709	0.99776	0.99776	NS	NS	NS
S29_Sutterella wadsworthensis	Icecream_Beer_non-alcoholic	205	205	-0.119788	0.542039	-0.117215	0.123228	0.342719	0.753652	Icecream_Beer_non-alcoholic	126	126	-0.0410161	0.57799	-0.0490837	0.0954178	0.608018	0.886009	Icecream_Beer_non-alcoholic	223	223	-0.0245111	0.517043	0.0655254	0.0774752	0.398619	0.855517	Icecream_Beer_non-alcoholic	871	871	0.0407092	0.884625	0.000245082	0.0131617	0.985148	0.985148	Icecream_Beer_non-alcoholic	65.8534	109.835	166.6	5772.68	0.012788	-0.000127358	-0.00995919	0.992054	0.99776	NS	NS	NS
S3_Faecalibacterium_prausnitzii_Bifidobacterium_bifidum	Icecream_Beer_non-alcoholic	205	205	-0.119788	0.542039	0.235164	0.0910586	0.0105282	0.305319	Icecream_Beer_non-alcoholic	126	126	-0.0410161	0.57799	-0.0952244	0.156465	0.543949	0.886009	Icecream_Beer_non-alcoholic	223	223	-0.0245111	0.517043	-0.0503672	0.0842355	0.550514	0.855517	Icecream_Beer_non-alcoholic	871	871	0.0407092	0.884625	-0.0138035	0.0258515	0.593511	0.883459	Icecream_Beer_non-alcoholic	120.603	40.8478	140.932	1496.33	0.0235786	-0.00182416	-0.0773648	0.938333	0.99776	NS	NS	NS
S24_Ruminococcus S24_Ruminococcus gnavus, Lachnospiraceae bacterium 1 1 57FAA, Lachnospiraceae bacterium	Dairy_lf	205	205	-0.0789894	0.503158	0.203595	0.163993	0.215901	0.695681	Dairy_lf	126	126	-0.0346258	0.518191	0.111225	0.111764	0.32172	0.734875	Dairy_lf	223	223	0.0070026	0.453292	0.0145157	0.0433996	0.738368	0.774319	Dairy_lf	871	871	0.0221807	0.682257	-0.0049565	0.0144031	0.730838	0.887984	Dairy_lf	37.1836	80.0564	530.92	4820.43	0.0135227	5.28287e-05	0.00390668	0.996883	0.997937	NS	NS	NS
S3_Faecalibacterium_prausnitzii_Bifidobacterium_bifidum	Dairy_lf	205	205	-0.0789894	0.503158	-0.211957	0.0998914	0.0350919	0.254416	Dairy_lf	126	126	-0.0346258	0.518191	-0.287682	0.174131	0.101151	0.538781	Dairy_lf	223	223	0.0070026	0.453292	-0.0442291	0.0944974	0.640226	0.774319	Dairy_lf	871	871	0.0221807	0.682257	0.0420553	0.033225	0.205936	0.853164	Dairy_lf	100.218	32.9797	111.985	905.876	0.0294748	0.00209759	0.0711656	0.943266	0.997937	NS	NS	NS
S5_Streptococcus, Bifidobacterium dentium	Dairy_lf	205	205	-0.0789894	0.503158	0.0130472	0.060196	0.828644	0.953416	Dairy_lf	126	126	-0.0346258	0.518191	-0.119267	0.0692802	0.0879939	0.538781	Dairy_lf	223	223	0.0070026	0.453292	0.00132516	0.0255855	0.958748	0.958748	Dairy_lf	871	871	0.0221807	0.682257	0.0020805	0.0104778	0.842654	0.891423	Dairy_lf	275.971	208.344	1527.61	9108.84	0.00948271	-2.45205e-05	-0.00258581	0.997937	0.997937	NS	NS	NS
S13_Escherichia coli, Bacteroides fragilis	Wine_Alcohol	205	205	-0.27214	0.559289	-0.160077	0.0870523	0.067488	0.489288	Wine_Alcohol	126	126	-0.21131	0.583969	-0.104068	0.070671	0.143575	0.656491	Wine_Alcohol	223	223	-0.0117566	0.664384	0.00512981	0.0312686	0.869845	0.934278	Wine_Alcohol	871	871	0.0981863	0.783786	0.0082209	0.0142571	0.564348	0.743914	Wine_Alcohol	131.959	200.225	1022.78	4919.72	0.0126242	0.000594539	0.0470952	0.962437	0.998993	NS	NS	NS
S14_Odoribacter	Wine_Alcohol	205	205	-0.27214	0.559289	-0.0746889	0.0742415	0.315731	0.755952	Wine_Alcohol	126	126	-0.21131	0.583969	-0.150497	0.165235	0.364224	0.87106	Wine_Alcohol	223	223	-0.0117566	0.664384	-0.0978252	0.070679	0.167833	0.695307	Wine_Alcohol	871	871	0.0981863	0.783786	0.035303	0.0345125	0.306641	0.674363	Wine_Alcohol	181.429	36.6266	200.179	839.552	0.0281966	-0.0071608	-0.25396	0.799527	0.998993	NS	NS	NS
S15_Parabacteroides johnsonii	Wine_Alcohol	205	205	-0.27214	0.559289	0.460837	0.190104	0.0162389	0.235464	Wine_Alcohol	126	126	-0.21131	0.583969	0.116084	0.175927	0.510621	0.87106	Wine_Alcohol	223	223	-0.0117566	0.664384	-0.0194279	0.0751017	0.796121	0.934278	Wine_Alcohol	871	871	0.0981863	0.783786	-0.0253079	0.038023	0.505848	0.712905	Wine_Alcohol	27.6706	32.3098	177.296	691.682	0.0328097	-0.00478738	-0.145914	0.88399	0.998993	NS	NS	NS
S19_Streptococci, L. sakei	Wine_Alcohol	205	205	-0.27214	0.559289	-0.0671516	0.0438521	0.127389	0.527756	Wine_Alcohol	126	126	-0.21131	0.583969	-0.123016	0.0789694	0.122085	0.656491	Wine_Alcohol	223	223	-0.0117566	0.664384	0.0285363	0.05033	0.571332	0.934278	Wine_Alcohol	871	871	0.0981863	0.783786	0.0122918	0.0182534	0.500879	0.712905	Wine_Alcohol	520.019	160.355	394.771	3001.32	0.0156624	-0.00159187	-0.101637	0.919045	0.998993	NS	NS	NS
S2_Bifidobacterium animalis	Wine_Alcohol	205	205	-0.27214	0.559289	0.0262473	0.0666367	0.694087	0.875346	Wine_Alcohol	126	126	-0.21131	0.583969	0.484099	0.183194	0.00932583	0.270449	Wine_Alcohol	223	223	-0.0117566	0.664384	0.0480896	0.133233	0.718492	0.934278	Wine_Alcohol	871	871	0.0981863	0.783786	-0.0489695	0.0416306	0.239804	0.632212	Wine_Alcohol	225.202	29.7973	56.335	576.997	0.0335515	-0.00586533	-0.174816	0.861225	0.998993	NS	NS	NS
S3_Faecalibacterium_prausnitzii_Bifidobacterium_bifidum	Wine_Alcohol	205	205	-0.27214	0.559289	0.0450626	0.091587	0.62325	0.860679	Wine_Alcohol	126	126	-0.21131	0.583969	0.0443377	0.156246	0.777081	0.892704	Wine_Alcohol	223	223	-0.0117566	0.664384	-0.0373942	0.0646647	0.563682	0.934278	Wine_Alcohol	871	871	0.0981863	0.783786	0.000133389	0.0288971	0.996318	0.996318	Wine_Alcohol	119.215	40.9621	239.147	1197.54	0.0250245	-0.000998604	-0.039905	0.968169	0.998993	NS	NS	NS
S6_Bifidobacterium_pseudocatenulatum	Wine_Alcohol	205	205	-0.27214	0.559289	-0.336043	0.169462	0.0487434	0.471186	Wine_Alcohol	126	126	-0.21131	0.583969	-0.0226559	0.195294	0.907839	0.940262	Wine_Alcohol	223	223	-0.0117566	0.664384	0.0576097	0.0933532	0.537806	0.934278	Wine_Alcohol	871	871	0.0981863	0.783786	0.00805675	0.0375213	0.830032	0.891516	Wine_Alcohol	34.822	26.2193	114.747	710.305	0.0335939	4.24092e-05	0.00126241	0.998993	0.998993	NS	NS	NS
