# Supplementary material for: Long-term dietary patterns are associated with pro-inflammatory and anti-inflammatory features of the gut microbiome
Source: Gut. 2021 Apr 2;70(7):1287–98. doi: 10.1136/gutjnl-2020-322670 (PMC8223641; doi:10.1136/gutjnl-2020-322670)
Supplement: Supplementary data [file gutjnl-2020-322670supp006.xlsx]

## Sheet: S5_Markers_food_clusters
Table S5. Associations of intestinal inflammatory markes with food clusters
Shown are all associations per cohort and pooled results of the meta-analysis. Statistically significant results of the meta-analysis are coloured:
Red = positive association (FDR < 0.05, het-p > 0.05); blue = negative association (FDR < 0.05, het-p > 0.05); Light red and light blue inidicate heterogeneous results (FDR < 0.05 but het-p < 0.05)
Methods
Measurements of chromogranin A and fecal calprotectin were performed on the same fecal sample as metagenomic sequencing.
Unsupervised hierarchical clustering ased on squared Euclidean distances was used to identify clusters of foods.
In each cohort, a multivariate linear model of food clusters versus inflammatory markers was constructed, adding age, sex, caloric intake and sequencing depth as covariates.
Next, an inverse-variance meta-analysis was performed, followed by multiple testing correction and a Cochran’s Q test
Marker	Food cluster	N.CD	non-zeros.CD	Mean.CD	SD.CD	Coef.CD	SE.CD	Pval.CD	Qval.CD	food.CD	N.UC	non-zeros.UC	Mean.UC	SD.UC	Coef.UC	SE.UC	Pval.UC	Qval.UC	food.UC	N.IBS	non-zeros.IBS	Mean.IBS	SD.IBS	Coef.IBS	SE.IBS	Pval.IBS	Qval.IBS	food.IBS	N.HC	non-zeros.HC	Mean.HC	SD.HC	Coef.HC	SE.HC	Pval.HC	Qval.HC	food.HC	inverse_var.cd	inverse_var.uc	inverse_var.ibs	inverse_var.hc	se	beta	Z	P	FDR	Het.Q	Het.I2	Het.Pval
Calpro_D40	Meat_Potatoes_Gravy	205	NA	0.0092388	0.66643	0.553728	0.784462	0.481259	0.481259	Meat_Potatoes_Gravy	126	NA	0.0317397	0.612627	1.58495	1.14058	0.16828	0.16828	Meat_Potatoes_Gravy	223	NA	-0.12186	0.546907	0.225387	0.151854	0.139253	0.139253	Meat_Potatoes_Gravy	871	NA	0.0247565	0.537179	0.209175	0.067958	0.00215243	0.00215243	Meat_Potatoes_Gravy	1.62501	0.768682	43.3659	216.531	0.061746	0.218022	3.53095	0.000414073	0.000414073	1.63872	0	0.440714
Calpro_D40	Fastfood	205	NA	0.059247	0.613728	-0.677515	0.902259	0.45377	0.45377	Fastfood	126	NA	0.0181697	0.719587	1.10636	1.38454	0.426468	0.426468	Fastfood	223	NA	-0.0641103	0.381483	0.220328	0.24053	0.360718	0.360718	Fastfood	871	NA	8.79047e-06	0.532809	0.249788	0.0878709	0.00458341	0.00458341	Fastfood	1.22839	0.521664	17.2846	129.512	0.0820481	0.2417	2.94584	0.0032208	0.0032208	1.44432	0	0.485701
ChrA	Porridge_ready_Fish_fried_Chocolatemilk	205	NA	0.0773975	0.762121	-10.3902	43.6522	0.812121	0.812121	Porridge_ready_Fish_fried_Chocolatemilk	126	NA	0.129518	0.829902	-38.7935	34.265	0.259902	0.259902	Porridge_ready_Fish_fried_Chocolatemilk	223	NA	-0.0295003	0.594099	1.85507	2.18177	0.396159	0.396159	Porridge_ready_Fish_fried_Chocolatemilk	871	NA	-0.0289628	0.569582	2.25581	0.824678	0.00636852	0.00636852	Porridge_ready_Fish_fried_Chocolatemilk	0.000524794	0.000851721	0.210079	1.47038	0.771095	2.18102	2.82847	0.00467717	0.00467717	1.54345	0	0.462216
ChrA	Bread_Legumes	205	NA	-0.0736819	0.691941	-39.4268	54.4053	0.46954	0.46954	Bread_Legumes	126	NA	0.0277121	0.583927	-47.0383	51.1916	0.360071	0.360071	Bread_Legumes	223	NA	-0.116311	0.444079	-4.34871	3.24963	0.182288	0.182288	Bread_Legumes	871	NA	0.0435099	0.579569	-2.31026	0.920703	0.0122955	0.0122955	Bread_Legumes	0.000337845	0.000381596	0.0946958	1.17967	0.885585	-2.48486	-2.8059	0.00501759	0.00501759	1.58346	0	0.45306
Calpro_D40	Ready_meals	205	NA	-0.0761095	0.668047	-0.295772	0.616316	0.631928	0.631928	Ready_meals	126	NA	-0.0726462	0.963861	-0.154451	0.75047	0.837435	0.837435	Ready_meals	223	NA	0.0593805	0.744316	-0.0944405	0.0944181	0.318353	0.318353	Ready_meals	871	NA	0.0135936	0.640699	-0.100917	0.0527561	0.056105	0.056105	Ready_meals	2.63265	1.77555	112.173	359.298	0.0458407	-0.100668	-2.19604	0.0280891	0.0280891	0.109722	0	0.946617
Calpro_D40	Cheese_Butter	205	NA	-0.0931494	0.425837	-0.598659	0.970474	0.538163	0.538163	Cheese_Butter	126	NA	-0.00880917	0.675371	-0.699317	0.840887	0.407941	0.407941	Cheese_Butter	223	NA	-0.0538434	0.563146	-0.0466728	0.126041	0.711535	0.711535	Cheese_Butter	871	NA	0.0356952	0.679706	-0.0993255	0.0474849	0.0367663	0.0367663	Cheese_Butter	1.06178	1.41425	62.9473	443.495	0.0443278	-0.0955221	-2.1549	0.0311694	0.0311694	0.940999	0	0.62469
Calpro_D40	Fish_Nuts	205	NA	-0.135461	0.55016	0.277	0.680887	0.684663	0.684663	Fish_Nuts	126	NA	0.0141888	0.575752	-1.84678	1.08875	0.0935011	0.0935011	Fish_Nuts	223	NA	0.0520077	0.656703	-0.100327	0.105884	0.34447	0.34447	Fish_Nuts	871	NA	0.0168252	0.570004	-0.10038	0.0558328	0.0725606	0.0725606	Fish_Nuts	2.157	0.843613	89.1951	320.791	0.0492076	-0.101965	-2.07214	0.0382525	0.0382525	2.87909	0	0.237036
ChrA	Vegetables_Fruit_Tea	205	NA	-0.11222	0.77642	-68.0999	42.4693	0.110492	0.110492	Vegetables_Fruit_Tea	126	NA	-0.000156026	0.675955	12.3368	44.5808	0.782481	0.782481	Vegetables_Fruit_Tea	223	NA	0.0418139	0.681131	-1.32731	1.94094	0.49483	0.49483	Vegetables_Fruit_Tea	871	NA	0.0161285	0.690431	-1.20017	0.688825	0.0818329	0.0818329	Vegetables_Fruit_Tea	0.000554434	0.000503159	0.265447	2.10757	0.649012	-1.22714	-1.89078	0.0586544	0.0586544	2.57618	0	0.275797
ChrA	Meat	205	NA	0.0153272	0.592254	35.5677	58.7584	0.545691	0.545691	Meat	126	NA	0.00509592	0.600788	63.7005	47.7841	0.185114	0.185114	Meat	223	NA	-0.0138947	0.560121	3.07147	2.36835	0.196109	0.196109	Meat	871	NA	-0.0016754	0.624155	1.21704	0.811725	0.134183	0.134183	Meat	0.000289641	0.000437959	0.178282	1.51769	0.767711	1.43389	1.86774	0.0617977	0.0617977	2.58495	0	0.27459
ChrA	Wine_Alcohol	205	NA	-0.27214	0.559289	47.0483	60.8971	0.440731	0.440731	Wine_Alcohol	126	NA	-0.21131	0.583969	-52.9767	46.9723	0.261719	0.261719	Wine_Alcohol	223	NA	-0.0117566	0.664384	1.11652	1.97379	0.572227	0.572227	Wine_Alcohol	871	NA	0.0981863	0.783786	0.950012	0.643106	0.140008	0.140008	Wine_Alcohol	0.000269654	0.000453228	0.256683	2.41788	0.611385	0.961498	1.57266	0.115799	0.115799	NS	NS	NS
Calpro_D40	Porridge_ready_Fish_fried_Chocolatemilk	205	NA	0.0773975	0.762121	-0.252673	0.503886	0.61672	0.61672	Porridge_ready_Fish_fried_Chocolatemilk	126	NA	0.129518	0.829902	0.176269	0.868319	0.83962	0.83962	Porridge_ready_Fish_fried_Chocolatemilk	223	NA	-0.0295003	0.594099	0.204266	0.118913	0.0873192	0.0873192	Porridge_ready_Fish_fried_Chocolatemilk	871	NA	-0.0289628	0.569582	0.0551374	0.0567421	0.331473	0.331473	Porridge_ready_Fish_fried_Chocolatemilk	3.93855	1.3263	70.7197	310.591	0.0508607	0.0796983	1.56699	0.117117	0.117117	NS	NS	NS
ChrA	Savoury_snacks	205	NA	-0.0114351	0.501597	129.809	67.2806	0.0551838	0.0551838	Savoury_snacks	126	NA	0.0331572	0.582506	36.0176	49.7347	0.470405	0.470405	Savoury_snacks	223	NA	-0.010086	0.411775	-0.665009	3.22315	0.836741	0.836741	Savoury_snacks	871	NA	0.000932337	0.495994	1.74605	1.04689	0.0957388	0.0957388	Savoury_snacks	0.000220912	0.000404278	0.0962584	0.912421	0.99538	1.55786	1.56509	0.117562	0.117562	NS	NS	NS
ChrA	Eggs_Alcoholic_drinks	205	NA	-0.104303	0.43925	-6.96887	76.6389	0.927643	0.927643	Eggs_Alcoholic_drinks	126	NA	-0.134042	0.302491	-54.6695	98.9595	0.581708	0.581708	Eggs_Alcoholic_drinks	223	NA	-0.0546888	0.448173	4.03559	3.50416	0.250784	0.250784	Eggs_Alcoholic_drinks	871	NA	0.0583724	0.606478	1.11856	0.871455	0.199667	0.199667	Eggs_Alcoholic_drinks	0.000170256	0.000102114	0.0814391	1.31677	0.845613	1.28338	1.51769	0.129093	0.129093	NS	NS	NS
Calpro_D40	Dairy_lf	205	NA	-0.0789894	0.503158	0.770337	0.752785	0.307647	0.307647	Dairy_lf	126	NA	-0.0346258	0.518191	-0.910055	0.971964	0.351769	0.351769	Dairy_lf	223	NA	0.0070026	0.453292	-0.157007	0.152445	0.304234	0.304234	Dairy_lf	871	NA	0.0221807	0.682257	0.111792	0.0565474	0.0483759	0.0483759	Dairy_lf	1.76465	1.05852	43.0305	312.733	0.0528084	0.0797608	1.51038	0.130946	0.130946	NS	NS	NS
Calpro_D40	Vegetables_Fruit_Tea	205	NA	-0.11222	0.77642	0.184525	0.544685	0.735208	0.735208	Vegetables_Fruit_Tea	126	NA	-0.000156026	0.675955	0.296957	0.928546	0.749898	0.749898	Vegetables_Fruit_Tea	223	NA	0.0418139	0.681131	-0.061172	0.105684	0.563335	0.563335	Vegetables_Fruit_Tea	871	NA	0.0161285	0.690431	-0.0635313	0.0464764	0.172008	0.172008	Vegetables_Fruit_Tea	3.37061	1.15983	89.5324	462.951	0.0423708	-0.0609004	-1.43732	0.150627	0.150627	NS	NS	NS
ChrA	Fastfood	205	NA	0.059247	0.613728	35.6009	78.039	0.648774	0.648774	Fastfood	126	NA	0.0181697	0.719587	20.605	67.0741	0.759244	0.759244	Fastfood	223	NA	-0.0641103	0.381483	-0.179304	4.42088	0.967687	0.967687	Fastfood	871	NA	8.79047e-06	0.532809	1.83383	1.29978	0.158669	0.158669	Fastfood	0.000164201	0.000222275	0.0511662	0.591916	1.24663	1.68885	1.35474	0.175501	0.175501	NS	NS	NS
Calpro_D40	Pastry_Sweets	205	NA	-0.0467602	0.641192	-1.63111	0.647627	0.0127286	0.0127286	Pastry_Sweets	126	NA	0.0864701	0.764689	0.0503513	0.981952	0.959225	0.959225	Pastry_Sweets	223	NA	0.04413	0.575045	-0.108513	0.13627	0.426756	0.426756	Pastry_Sweets	871	NA	-0.0122277	0.629675	-0.0529274	0.058982	0.369794	0.369794	Pastry_Sweets	2.38424	1.0371	53.8514	287.449	0.0538599	-0.0722155	-1.3408	0.179985	0.179985	NS	NS	NS
ChrA	Spreads_sweet	205	NA	-0.0555374	0.536875	65.9988	64.3361	0.306277	0.306277	Spreads_sweet	126	NA	0.0129582	0.465282	102.608	62.1336	0.101359	0.101359	Spreads_sweet	223	NA	-0.0241369	0.470388	4.29099	2.93023	0.144598	0.144598	Spreads_sweet	871	NA	0.0180257	0.519839	-1.77171	0.943778	0.0608465	0.0608465	Spreads_sweet	0.000241596	0.000259028	0.116465	1.12269	0.898151	-1.1671	-1.29945	0.19379	0.19379	NS	NS	NS
Calpro_D40	Savoury_snacks	205	NA	-0.0114351	0.501597	-0.88165	0.768294	0.252809	0.252809	Savoury_snacks	126	NA	0.0331572	0.582506	1.52776	1.10519	0.170487	0.170487	Savoury_snacks	223	NA	-0.010086	0.411775	-0.0544446	0.180571	0.763322	0.763322	Savoury_snacks	871	NA	0.000932337	0.495994	0.104025	0.0683246	0.128262	0.128262	Savoury_snacks	1.69413	0.818696	30.6694	214.213	0.0635776	0.0823413	1.29513	0.195275	0.195275	NS	NS	NS
Calpro_D40	Icecream_Beer_non-alcoholic	205	NA	-0.119788	0.542039	1.11588	0.732139	0.129377	0.129377	Icecream_Beer_non-alcoholic	126	NA	-0.0410161	0.57799	-0.281432	0.878347	0.749443	0.749443	Icecream_Beer_non-alcoholic	223	NA	-0.0245111	0.517043	-0.203505	0.136157	0.136519	0.136519	Icecream_Beer_non-alcoholic	871	NA	0.0407092	0.884625	-0.0345106	0.0359725	0.337656	0.337656	Icecream_Beer_non-alcoholic	1.86558	1.29619	53.9409	772.787	0.0347128	-0.0432944	-1.24722	0.212318	0.212318	NS	NS	NS
ChrA	Meat_Potatoes_Gravy	205	NA	0.0092388	0.66643	-51.7059	57.2911	0.367934	0.367934	Meat_Potatoes_Gravy	126	NA	0.0317397	0.612627	78.2482	54.701	0.15527	0.15527	Meat_Potatoes_Gravy	223	NA	-0.12186	0.546907	-0.736254	2.79231	0.792294	0.792294	Meat_Potatoes_Gravy	871	NA	0.0247565	0.537179	1.42073	1.0145	0.161772	0.161772	Meat_Potatoes_Gravy	0.000304667	0.000334203	0.128254	0.971618	0.953241	1.17798	1.23576	0.216546	0.216546	NS	NS	NS
ChrA	Sweetened_tea_yoghurtdrink	205	NA	0.111425	1.12755	-14.8915	30.3187	0.623879	0.623879	Sweetened_tea_yoghurtdrink	126	NA	0.0674218	0.540567	2.03826	53.5425	0.969699	0.969699	Sweetened_tea_yoghurtdrink	223	NA	0.00250442	0.480442	0.0925221	2.67874	0.97248	0.97248	Sweetened_tea_yoghurtdrink	871	NA	-0.0373747	0.434722	1.43291	1.0775	0.183949	0.183949	Sweetened_tea_yoghurtdrink	0.00108787	0.000348821	0.13936	0.861316	0.998945	1.22899	1.23029	0.218588	0.218588	NS	NS	NS
Calpro_D40	Sugar_Sweets	205	NA	0.184389	1.11711	0.332879	0.379424	0.381577	0.381577	Sugar_Sweets	126	NA	0.0308263	0.62208	-0.996431	0.853135	0.246087	0.246087	Sugar_Sweets	223	NA	-0.0900997	0.489801	0.0656456	0.157786	0.677807	0.677807	Sugar_Sweets	871	NA	-0.0242716	0.577625	0.063201	0.0604837	0.296361	0.296361	Sugar_Sweets	6.94625	1.37393	40.1663	273.353	0.0557417	0.0648029	1.16256	0.245009	0.245009	NS	NS	NS
Calpro_D40	Bread_Legumes	205	NA	-0.0736819	0.691941	-0.0131336	0.701793	0.985091	0.985091	Bread_Legumes	126	NA	0.0277121	0.583927	-0.773375	1.08902	0.479552	0.479552	Bread_Legumes	223	NA	-0.116311	0.444079	-0.180651	0.173945	0.300212	0.300212	Bread_Legumes	871	NA	0.0435099	0.579569	-0.0416989	0.0617862	0.499934	0.499934	Bread_Legumes	2.0304	0.843191	33.0505	261.949	0.0579408	-0.0589928	-1.01816	0.308604	0.308604	NS	NS	NS
ChrA	Pasta_Pizza	205	NA	-0.126846	0.636288	-36.082	54.6365	0.509801	0.509801	Pasta_Pizza	126	NA	-0.0709619	0.607965	-35.0464	51.6713	0.498959	0.498959	Pasta_Pizza	223	NA	0.00315542	0.506156	-2.42392	3.03526	0.42544	0.42544	Pasta_Pizza	871	NA	0.0399249	0.617093	-0.701191	0.917542	0.444969	0.444969	Pasta_Pizza	0.000334992	0.000374543	0.108545	1.18781	0.878049	-0.864413	-0.984469	0.324885	0.324885	NS	NS	NS
Calpro_D40	Dairy_Cereals	205	NA	-0.161259	0.558239	0.202533	0.764927	0.791512	0.791512	Dairy_Cereals	126	NA	-0.0521211	0.621192	2.65433	0.877125	0.00327672	0.00327672	Dairy_Cereals	223	NA	-0.0111794	0.671357	0.102314	0.110452	0.355349	0.355349	Dairy_Cereals	871	NA	0.0462207	0.622802	0.0176403	0.0539754	0.743886	0.743886	Dairy_Cereals	1.70907	1.2998	81.9695	343.248	0.048324	0.0425892	0.881326	0.378141	0.378141	NS	NS	NS
ChrA	Fruit_Juice_Milk	205	NA	0.0499406	0.971662	-32.6091	33.6555	0.33383	0.33383	Fruit_Juice_Milk	126	NA	0.0470696	0.883709	5.64202	37.5933	0.880962	0.880962	Fruit_Juice_Milk	223	NA	-0.0460608	0.585582	4.30827	2.38159	0.0718971	0.0718971	Fruit_Juice_Milk	871	NA	-0.00752221	0.66348	-1.01916	0.758219	0.179281	0.179281	Fruit_Juice_Milk	0.00088285	0.000707586	0.176305	1.73945	0.722188	-0.541373	-0.749629	0.453478	0.453478	NS	NS	NS
ChrA	Dairy_Lean_beef	205	NA	-0.201195	0.55624	-85.9013	64.8872	0.18715	0.18715	Dairy_Lean_beef	126	NA	-0.146976	0.56817	23.0023	52.2842	0.660794	0.660794	Dairy_Lean_beef	223	NA	0.0254258	0.537627	3.87005	2.6034	0.138651	0.138651	Dairy_Lean_beef	871	NA	0.0612162	0.608226	0.16209	0.799616	0.839414	0.839414	Dairy_Lean_beef	0.00023751	0.000365813	0.147543	1.564	0.76424	0.474562	0.62096	0.534626	0.534626	NS	NS	NS
Calpro_D40	Dairy_Lean_beef	205	NA	-0.201195	0.55624	-0.449877	0.727956	0.537422	0.537422	Dairy_Lean_beef	126	NA	-0.146976	0.56817	0.527318	0.964559	0.586022	0.586022	Dairy_Lean_beef	223	NA	0.0254258	0.537627	-0.123845	0.140078	0.377652	0.377652	Dairy_Lean_beef	871	NA	0.0612162	0.608226	0.0537248	0.0548972	0.328041	0.328041	Dairy_Lean_beef	1.88708	1.07484	50.9635	331.817	0.0509156	0.0291207	0.57194	0.567363	0.567363	NS	NS	NS
ChrA	Ready_meals	205	NA	-0.0761095	0.668047	5.4109	50.3377	0.914513	0.914513	Ready_meals	126	NA	-0.0726462	0.963861	19.6807	30.3388	0.517816	0.517816	Ready_meals	223	NA	0.0593805	0.744316	-2.39408	1.72228	0.165996	0.165996	Ready_meals	871	NA	0.0135936	0.640699	-0.00320183	0.775956	0.996709	0.996709	Ready_meals	0.00039465	0.00108644	0.337126	1.66083	0.707206	-0.394563	-0.557919	0.5769	0.5769	NS	NS	NS
ChrA	Pastry_Sweets	205	NA	-0.0467602	0.641192	144.816	53.9687	0.00793586	0.00793586	Pastry_Sweets	126	NA	0.0864701	0.764689	11.868	52.0946	0.82019	0.82019	Pastry_Sweets	223	NA	0.04413	0.575045	-3.09003	2.50459	0.21869	0.21869	Pastry_Sweets	871	NA	-0.0122277	0.629675	-0.164061	0.854857	0.847856	0.847856	Pastry_Sweets	0.000343333	0.00036848	0.159414	1.3684	0.808842	-0.433752	-0.536263	0.591777	0.591777	NS	NS	NS
Calpro_D40	Spreads_sweet	205	NA	-0.0555374	0.536875	-0.953019	0.733948	0.195922	0.195922	Spreads_sweet	126	NA	0.0129582	0.465282	-2.08998	1.23106	0.0932233	0.0932233	Spreads_sweet	223	NA	-0.0241369	0.470388	0.0668746	0.161516	0.679267	0.679267	Spreads_sweet	871	NA	0.0180257	0.519839	-0.0327594	0.0629029	0.60265	0.60265	Spreads_sweet	1.85639	0.659839	38.3327	252.731	0.0583629	-0.030193	-0.517332	0.604925	0.604925	NS	NS	NS
Calpro_D40	Pasta_Pizza	205	NA	-0.126846	0.636288	-0.912041	0.634873	0.152722	0.152722	Pasta_Pizza	126	NA	-0.0709619	0.607965	0.848738	1.16218	0.467214	0.467214	Pasta_Pizza	223	NA	0.00315542	0.506156	-0.0806627	0.16749	0.630595	0.630595	Pasta_Pizza	871	NA	0.0399249	0.617093	0.0516797	0.0625931	0.409243	0.409243	Pasta_Pizza	2.48099	0.740383	35.6471	255.239	0.0583105	0.0295161	0.506188	0.612724	0.612724	NS	NS	NS
ChrA	Dairy_lf	205	NA	-0.0789894	0.503158	-29.6076	66.3925	0.656145	0.656145	Dairy_lf	126	NA	-0.0346258	0.518191	-23.498	60.6762	0.699266	0.699266	Dairy_lf	223	NA	0.0070026	0.453292	-2.95551	2.78827	0.290384	0.290384	Dairy_lf	871	NA	0.0221807	0.682257	0.544724	0.704913	0.439896	0.439896	Dairy_lf	0.000226862	0.000271621	0.128626	2.01247	0.683332	0.328253	0.480372	0.630963	0.630963	NS	NS	NS
ChrA	Sugar_Sweets	205	NA	0.184389	1.11711	-20.88	33.4599	0.533361	0.533361	Sugar_Sweets	126	NA	0.0308263	0.62208	17.7087	45.7455	0.699381	0.699381	Sugar_Sweets	223	NA	-0.0900997	0.489801	1.37341	2.89525	0.635737	0.635737	Sugar_Sweets	871	NA	-0.0242716	0.577625	0.335243	0.973015	0.730531	0.730531	Sugar_Sweets	0.000893203	0.000477864	0.119296	1.05624	0.921785	0.431429	0.468036	0.639759	0.639759	NS	NS	NS
Calpro_D40	Sweetened_tea_yoghurtdrink	205	NA	0.111425	1.12755	0.826688	0.340069	0.0161241	0.0161241	Sweetened_tea_yoghurtdrink	126	NA	0.0674218	0.540567	1.08905	0.986248	0.272609	0.272609	Sweetened_tea_yoghurtdrink	223	NA	0.00250442	0.480442	0.152279	0.146748	0.300612	0.300612	Sweetened_tea_yoghurtdrink	871	NA	-0.0373747	0.434722	-0.045	0.0730324	0.537955	0.537955	Sweetened_tea_yoghurtdrink	8.64699	1.02808	46.4364	187.486	0.0640713	0.0283353	0.442246	0.658311	0.658311	NS	NS	NS
ChrA	Cheese_Butter	205	NA	-0.0931494	0.425837	-23.8033	76.3724	0.755632	0.755632	Cheese_Butter	126	NA	-0.00880917	0.675371	-39.2837	41.4605	0.345354	0.345354	Cheese_Butter	223	NA	-0.0538434	0.563146	-2.10494	2.37567	0.376617	0.376617	Cheese_Butter	871	NA	0.0356952	0.679706	-0.102694	0.7135	0.885592	0.885592	Cheese_Butter	0.000171446	0.000581744	0.177186	1.96432	0.683226	-0.280837	-0.411045	0.68104	0.68104	NS	NS	NS
ChrA	Fish_Nuts	205	NA	-0.135461	0.55016	-29.9624	59.231	0.613546	0.613546	Fish_Nuts	126	NA	0.0141888	0.575752	39.5114	48.4478	0.416431	0.416431	Fish_Nuts	223	NA	0.0520077	0.656703	-1.39977	1.94408	0.472324	0.472324	Fish_Nuts	871	NA	0.0168252	0.570004	-0.107703	0.829849	0.896768	0.896768	Fish_Nuts	0.000285037	0.000426041	0.264588	1.45212	0.763066	-0.301887	-0.395624	0.692382	0.692382	NS	NS	NS
Calpro_D40	Fruit_Juice_Milk	205	NA	0.0499406	0.971662	0.0736664	0.403389	0.85532	0.85532	Fruit_Juice_Milk	126	NA	0.0470696	0.883709	0.653727	0.751816	0.387006	0.387006	Fruit_Juice_Milk	223	NA	-0.0460608	0.585582	0.174392	0.124343	0.162246	0.162246	Fruit_Juice_Milk	871	NA	-0.00752221	0.66348	-0.012966	0.0500696	0.79573	0.79573	Fruit_Juice_Milk	6.14543	1.7692	64.6781	398.889	0.046054	0.0163668	0.355383	0.722303	0.722303	NS	NS	NS
ChrA	Pastry_Cream	205	NA	-0.0651555	0.556024	16.9598	59.8927	0.777356	0.777356	Pastry_Cream	126	NA	0.0592037	0.832987	-19.6751	40.4126	0.62728	0.62728	Pastry_Cream	223	NA	-0.0509842	0.476141	-1.26542	2.83425	0.65572	0.65572	Pastry_Cream	871	NA	0.0200538	0.596495	-0.185192	0.873206	0.832096	0.832096	Pastry_Cream	0.000278774	0.000612302	0.124487	1.31149	0.83424	-0.283759	-0.340141	0.73375	0.73375	NS	NS	NS
Calpro_D40	Meat	205	NA	0.0153272	0.592254	-1.47463	0.67062	0.0292675	0.0292675	Meat	126	NA	0.00509592	0.600788	1.36632	0.971961	0.163447	0.163447	Meat	223	NA	-0.0138947	0.560121	-0.0260651	0.130095	0.841397	0.841397	Meat	871	NA	-0.0016754	0.624155	0.0285747	0.0544537	0.599895	0.599895	Meat	2.22355	1.05853	59.0857	337.245	0.0500242	0.0156751	0.313351	0.754014	0.754014	NS	NS	NS
Calpro_D40	Pastry_Cream	205	NA	-0.0651555	0.556024	0.181441	0.769669	0.813926	0.813926	Pastry_Cream	126	NA	0.0592037	0.832987	-1.69239	1.01294	0.0984454	0.0984454	Pastry_Cream	223	NA	-0.0509842	0.476141	0.201944	0.156258	0.197655	0.197655	Pastry_Cream	871	NA	0.0200538	0.596495	-0.0054775	0.0577004	0.924393	0.924393	Pastry_Cream	1.68807	0.974614	40.9559	300.361	0.053918	0.0153568	0.284817	0.775784	0.775784	NS	NS	NS
ChrA	Dairy_Cereals	205	NA	-0.161259	0.558239	-42.7233	62.0111	0.491692	0.491692	Dairy_Cereals	126	NA	-0.0521211	0.621192	19.1677	45.8317	0.67656	0.67656	Dairy_Cereals	223	NA	-0.0111794	0.671357	2.895	2.0467	0.158719	0.158719	Dairy_Cereals	871	NA	0.0462207	0.622802	-0.289494	0.805474	0.719385	0.719385	Dairy_Cereals	0.000260053	0.000476068	0.238721	1.54133	0.749365	0.136404	0.182026	0.855563	0.855563	NS	NS	NS
Calpro_D40	Rolls_Spreads	205	NA	0.00970005	1.07387	0.899914	0.693988	0.196524	0.196524	Rolls_Spreads	126	NA	0.0143831	0.689611	1.51149	2.67822	0.573992	0.573992	Rolls_Spreads	223	NA	-0.16152	0.433979	0.0572301	0.376838	0.879436	0.879436	Rolls_Spreads	871	NA	0.0374261	0.602796	-0.0628357	0.126635	0.619887	0.619887	Rolls_Spreads	2.07633	0.139414	7.04191	62.3584	0.118167	-0.0200525	-0.169697	0.865248	0.865248	NS	NS	NS
Calpro_D40	Eggs_Alcoholic_drinks	205	NA	-0.104303	0.43925	-1.73362	0.971182	0.0760769	0.0760769	Eggs_Alcoholic_drinks	126	NA	-0.134042	0.302491	-2.80454	2.08273	0.181699	0.181699	Eggs_Alcoholic_drinks	223	NA	-0.0546888	0.448173	-0.016084	0.15615	0.918059	0.918059	Eggs_Alcoholic_drinks	871	NA	0.0583724	0.606478	0.0195043	0.0568851	0.731781	0.731781	Eggs_Alcoholic_drinks	1.06023	0.230533	41.0124	309.031	0.0533506	0.00820652	0.153822	0.87775	0.87775	NS	NS	NS
ChrA	Rolls_Spreads	205	NA	0.00970005	1.07387	3.76333	59.7691	0.949861	0.949861	Rolls_Spreads	126	NA	0.0143831	0.689611	-241.323	107.905	0.0272347	0.0272347	Rolls_Spreads	223	NA	-0.16152	0.433979	-12.0225	6.62951	0.0711984	0.0711984	Rolls_Spreads	871	NA	0.0374261	0.602796	0.808281	1.92277	0.674325	0.674325	Rolls_Spreads	0.000279928	8.58852e-05	0.0227529	0.270487	1.84552	-0.25405	-0.137658	0.890511	0.890511	NS	NS	NS
ChrA	Coffee_milk_Soup	205	NA	-0.0190486	0.599621	15.5737	58.35	0.789836	0.789836	Coffee_milk_Soup	126	NA	0.00261508	0.755444	62.7748	36.9964	0.0924198	0.0924198	Coffee_milk_Soup	223	NA	-0.00397076	0.684592	5.15046	1.86273	0.00620376	0.00620376	Coffee_milk_Soup	871	NA	0.00528062	0.524601	-1.20137	0.924124	0.19397	0.19397	Coffee_milk_Soup	0.00029371	0.000730602	0.288205	1.17095	0.827554	0.0877106	0.105988	0.915592	0.915592	NS	NS	NS
Calpro_D40	Coffee_milk_Soup	205	NA	-0.0190486	0.599621	0.082438	0.764698	0.914281	0.914281	Coffee_milk_Soup	126	NA	0.00261508	0.755444	1.32717	1.29052	0.30668	0.30668	Coffee_milk_Soup	223	NA	-0.00397076	0.684592	-0.0378221	0.102068	0.711343	0.711343	Coffee_milk_Soup	871	NA	0.00528062	0.524601	0.0173399	0.0609517	0.776109	0.776109	Coffee_milk_Soup	1.71009	0.600441	95.9883	269.171	0.0521662	0.00537402	0.103017	0.917949	0.917949	NS	NS	NS
Calpro_D40	Wine_Alcohol	205	NA	-0.27214	0.559289	-0.225495	0.677272	0.739595	0.739595	Wine_Alcohol	126	NA	-0.21131	0.583969	-1.69511	0.906572	0.0649545	0.0649545	Wine_Alcohol	223	NA	-0.0117566	0.664384	-0.132385	0.104252	0.205548	0.205548	Wine_Alcohol	871	NA	0.0981863	0.783786	0.028586	0.0405525	0.481061	0.481061	Wine_Alcohol	2.18009	1.21673	92.0086	608.087	0.0377025	0.00376421	0.0998396	0.920472	0.920472	NS	NS	NS
ChrA	Icecream_Beer_non-alcoholic	205	NA	-0.119788	0.542039	12.0096	62.8174	0.848588	0.848588	Icecream_Beer_non-alcoholic	126	NA	-0.0410161	0.57799	-83.1484	48.3265	0.0879981	0.0879981	Icecream_Beer_non-alcoholic	223	NA	-0.0245111	0.517043	-1.33197	2.4869	0.592812	0.592812	Icecream_Beer_non-alcoholic	871	NA	0.0407092	0.884625	0.0982999	0.645664	0.879031	0.879031	Icecream_Beer_non-alcoholic	0.00025342	0.000428183	0.16169	2.39876	0.624862	-0.00473498	-0.00757765	0.993954	0.993954	NS	NS	NS
